# Supplementary material for: Analysis of potential biomarkers for diabetic kidney disease based on single-cell RNA-sequencing integrated with a single-cell sequencing assay for transposase-accessible chromatin
Source: publisher site journal article supplement (doi:10.18632/aging.205107), 2023-10-11
Supplement: Supplementary file [file aging-v15i19-205107-supplementary-material-SD4.pdf]

**Supplementary Table 3. Cell number in each cluster.**

|        | <b>SR-db-db-<br/>01_number</b> | <b>SR-db-db-<br/>02_number</b> | <b>SR-db-db-<br/>03_number</b> | <b>SR-db-m-<br/>01_number</b> | <b>SR-db-m-<br/>02_number</b> | <b>SR-db-m-<br/>03_number</b> | <b>db/db<br/>toatl</b> | <b>db/db<br/>percent</b> | <b>db/m<br/>toatl</b> | <b>db/m<br/>percent</b> |
|--------|--------------------------------|--------------------------------|--------------------------------|-------------------------------|-------------------------------|-------------------------------|------------------------|--------------------------|-----------------------|-------------------------|
| B cell | 86                             | 63                             | 98                             | 408                           | 209                           | 288                           | 247                    | 0.017762117              | 905                   | 0.049856765             |
| CD     | 46                             | 16                             | 18                             | 16                            | 27                            | 27                            | 80                     | 0.005752912              | 70                    | 0.003856324             |
| DCT    | 194                            | 106                            | 193                            | 122                           | 150                           | 169                           | 493                    | 0.035452323              | 441                   | 0.024294844             |
| endo   | 18                             | 13                             | 16                             | 50                            | 46                            | 15                            | 47                     | 0.003379836              | 111                   | 0.006115029             |
| LOH    | 83                             | 97                             | 213                            | 43                            | 72                            | 119                           | 393                    | 0.028261182              | 234                   | 0.012891141             |
| M1     | 90                             | 48                             | 68                             | 122                           | 127                           | 126                           | 206                    | 0.014813749              | 375                   | 0.020658881             |
| M2     | 21                             | 28                             | 28                             | 74                            | 30                            | 50                            | 77                     | 0.005537178              | 154                   | 0.008483914             |
| Neut   | 11                             | 9                              | 24                             | 46                            | 20                            | 44                            | 44                     | 0.003164102              | 110                   | 0.006059938             |
| NK     | 10                             | 5                              | 25                             | 119                           | 37                            | 68                            | 40                     | 0.002876456              | 224                   | 0.012340238             |
| podo   | 9                              | 13                             | 8                              | 8                             | 26                            | 20                            | 30                     | 0.002157342              | 54                    | 0.002974879             |
| PTB    | 379                            | 429                            | 637                            | 331                           | 527                           | 490                           | 1445                   | 0.10391198               | 1348                  | 0.074261789             |
| PTS1   | 1034                           | 1151                           | 1408                           | 963                           | 1590                          | 1060                          | 3593                   | 0.258377679              | 3613                  | 0.199041428             |
| PTS2   | 1572                           | 1579                           | 1565                           | 968                           | 3501                          | 2310                          | 4716                   | 0.339134187              | 6779                  | 0.373457                |
| PTS3   | 549                            | 902                            | 920                            | 706                           | 1798                          | 918                           | 2371                   | 0.170501942              | 3422                  | 0.188519                |
| T cell | 39                             | 28                             | 57                             | 160                           | 52                            | 100                           | 124                    | 0.008917014              | 312                   | 0.017188                |
