# Supplementary material for: Analysis of potential biomarkers for diabetic kidney disease based on single-cell RNA-sequencing integrated with a single-cell sequencing assay for transposase-accessible chromatin
Source: Aging (Albany NY). 2023 Oct 11;15(19):10681–704. doi: 10.18632/aging.205107 (PMC10599739; doi:10.18632/aging.205107)
Supplement: Supplementary Table 2 [file aging-15-205107-s003.xlsx]

## Sheet: 工作表1
Supplementary Table 2. Marker genes used for annotation.
cell type	maker	reference
B cell	cd79a	Park J, Shrestha R, Qiu C, et al. Single-cell transcriptomics of the mouse kidney reveals potential cellular targets of kidney disease. Science. 2018;360(6390):758-763. doi:10.1126/science.aar2129
B cell	cd19	Park J, Shrestha R, Qiu C, et al. Single-cell transcriptomics of the mouse kidney reveals potential cellular targets of kidney disease. Science. 2018;360(6390):758-763. doi:10.1126/science.aar2130
B cell	CD22	Park J, Shrestha R, Qiu C, et al. Single-cell transcriptomics of the mouse kidney reveals potential cellular targets of kidney disease. Science. 2018;360(6390):758-763. doi:10.1126/science.aar2131
B cell	cd79b	Park J, Shrestha R, Qiu C, et al. Single-cell transcriptomics of the mouse kidney reveals potential cellular targets of kidney disease. Science. 2018;360(6390):758-763. doi:10.1126/science.aar2132
T cell	cd3e	（1）Ho TK, Rajkumar V, Black CM, Abraham DJ, Baker DM. Increased angiogenic response but deficient arteriolization and abnormal microvessel ultrastructure in critical leg ischaemia. Br J Surg. 2006;93(11):1368-1376. doi:10.1002/bjs.5496（2）Sachdeva H, Sehgal R, Kaur S. Tinospora cordifolia as a protective and immunomodulatory agent in combination with cisplatin against murine visceral leishmaniasis…
T cell	cd3g	（1）Ho TK, Rajkumar V, Black CM, Abraham DJ, Baker DM. Increased angiogenic response but deficient arteriolization and abnormal microvessel ultrastructure in critical leg ischaemia. Br J Surg. 2006;93(11):1368-1376. doi:10.1002/bjs.5496（2）Sachdeva H, Sehgal R, Kaur S. Tinospora cordifolia as a protective and immunomodulatory agent in combination with cisplatin against murine visceral leishmaniasis…
T cell	lef1	Park J, Shrestha R, Qiu C, et al. Single-cell transcriptomics of the mouse kidney reveals potential cellular targets of kidney disease. Science. 2018;360(6390):758-763. doi:10.1126/science.aar2131
M1	lyz2	Farmer DT, Nathan S, Finley JK, et al. Defining epithelial cell dynamics and lineage relationships in the developing lacrimal gland. Development. 2017;144(13):2517-2528. doi:10.1242/dev.150789
M1	cd74	Park J, Shrestha R, Qiu C, et al. Single-cell transcriptomics of the mouse kidney reveals potential cellular targets of kidney disease. Science. 2018;360(6390):758-763. doi:10.1126/science.aar2131
M1	cd83	Park J, Shrestha R, Qiu C, et al. Single-cell transcriptomics of the mouse kidney reveals potential cellular targets of kidney disease. Science. 2018;360(6390):758-763. doi:10.1126/science.aar2131
M1	cd86	Park J, Shrestha R, Qiu C, et al. Single-cell transcriptomics of the mouse kidney reveals potential cellular targets of kidney disease. Science. 2018;360(6390):758-763. doi:10.1126/science.aar2131
M1	cfh	Park J, Shrestha R, Qiu C, et al. Single-cell transcriptomics of the mouse kidney reveals potential cellular targets of kidney disease. Science. 2018;360(6390):758-763. doi:10.1126/science.aar2131
M2	c1qb	Park J, Shrestha R, Qiu C, et al. Single-cell transcriptomics of the mouse kidney reveals potential cellular targets of kidney disease. Science. 2018;360(6390):758-763. doi:10.1126/science.aar2131
M2	cd74	Park J, Shrestha R, Qiu C, et al. Single-cell transcriptomics of the mouse kidney reveals potential cellular targets of kidney disease. Science. 2018;360(6390):758-763. doi:10.1126/science.aar2131
M2	Axl	Park J, Shrestha R, Qiu C, et al. Single-cell transcriptomics of the mouse kidney reveals potential cellular targets of kidney disease. Science. 2018;360(6390):758-763. doi:10.1126/science.aar2131
M2	c1qa	Park J, Shrestha R, Qiu C, et al. Single-cell transcriptomics of the mouse kidney reveals potential cellular targets of kidney disease. Science. 2018;360(6390):758-763. doi:10.1126/science.aar2131
Neut	s100a9	Young MD, Mitchell TJ, Vieira Braga FA, et al. Single-cell transcriptomes from human kidneys reveal the cellular identity of renal tumors. Science. 2018;361(6402):594-599. doi:10.1126/science.aat1699
Neut	s100a8	Young MD, Mitchell TJ, Vieira Braga FA, et al. Single-cell transcriptomes from human kidneys reveal the cellular identity of renal tumors. Science. 2018;361(6402):594-599. doi:10.1126/science.aat1699
NK	gzma	Park J, Shrestha R, Qiu C, et al. Single-cell transcriptomics of the mouse kidney reveals potential cellular targets of kidney disease. Science. 2018;360(6390):758-763. doi:10.1126/science.aar2131
NK	ccl5	Park J, Shrestha R, Qiu C, et al. Single-cell transcriptomics of the mouse kidney reveals potential cellular targets of kidney disease. Science. 2018;360(6390):758-763. doi:10.1126/science.aar2131
NK	gzmb	Park J, Shrestha R, Qiu C, et al. Single-cell transcriptomics of the mouse kidney reveals potential cellular targets of kidney disease. Science. 2018;360(6390):758-763. doi:10.1126/science.aar2131
NK	fasl	Park J, Shrestha R, Qiu C, et al. Single-cell transcriptomics of the mouse kidney reveals potential cellular targets of kidney disease. Science. 2018;360(6390):758-763. doi:10.1126/science.aar2131
Podo	cryab	Park J, Shrestha R, Qiu C, et al. Single-cell transcriptomics of the mouse kidney reveals potential cellular targets of kidney disease. Science. 2018;360(6390):758-763. doi:10.1126/science.aar2131
Podo	pdpn	Park J, Shrestha R, Qiu C, et al. Single-cell transcriptomics of the mouse kidney reveals potential cellular targets of kidney disease. Science. 2018;360(6390):758-763. doi:10.1126/science.aar2131
Podo	synpo	Park J, Shrestha R, Qiu C, et al. Single-cell transcriptomics of the mouse kidney reveals potential cellular targets of kidney disease. Science. 2018;360(6390):758-763. doi:10.1126/science.aar2131
Podo	robo2	Park J, Shrestha R, Qiu C, et al. Single-cell transcriptomics of the mouse kidney reveals potential cellular targets of kidney disease. Science. 2018;360(6390):758-763. doi:10.1126/science.aar2131
endo	cd200	Park J, Shrestha R, Qiu C, et al. Single-cell transcriptomics of the mouse kidney reveals potential cellular targets of kidney disease. Science. 2018;360(6390):758-763. doi:10.1126/science.aar2131
endo	cd38	Park J, Shrestha R, Qiu C, et al. Single-cell transcriptomics of the mouse kidney reveals potential cellular targets of kidney disease. Science. 2018;360(6390):758-763. doi:10.1126/science.aar2131
endo	cdh5	Park J, Shrestha R, Qiu C, et al. Single-cell transcriptomics of the mouse kidney reveals potential cellular targets of kidney disease. Science. 2018;360(6390):758-763. doi:10.1126/science.aar2131
endo	dll4	Park J, Shrestha R, Qiu C, et al. Single-cell transcriptomics of the mouse kidney reveals potential cellular targets of kidney disease. Science. 2018;360(6390):758-763. doi:10.1126/science.aar2131
endo	grasp	Park J, Shrestha R, Qiu C, et al. Single-cell transcriptomics of the mouse kidney reveals potential cellular targets of kidney disease. Science. 2018;360(6390):758-763. doi:10.1126/science.aar2131
endo	kdr	Park J, Shrestha R, Qiu C, et al. Single-cell transcriptomics of the mouse kidney reveals potential cellular targets of kidney disease. Science. 2018;360(6390):758-763. doi:10.1126/science.aar2131
CD	slc26a4	(1)Park J, Shrestha R, Qiu C, et al. Single-cell transcriptomics of the mouse kidney reveals potential cellular targets of kidney disease. Science. 2018;360(6390):758-763. doi:10.1126/science.aar2131(2)Adam M, Potter AS, Potter SS. Psychrophilic proteases dramatically reduce single-cell RNA-seq artifacts: a molecular atlas of kidney development. Development. 2017;144(19):3625-3632. doi:10.1242/de…
CD	insrr	(1)Park J, Shrestha R, Qiu C, et al. Single-cell transcriptomics of the mouse kidney reveals potential cellular targets of kidney disease. Science. 2018;360(6390):758-763. doi:10.1126/science.aar2131(2)Adam M, Potter AS, Potter SS. Psychrophilic proteases dramatically reduce single-cell RNA-seq artifacts: a molecular atlas of kidney development. Development. 2017;144(19):3625-3632. doi:10.1242/de…
CD	aqp2	(1)Park J, Shrestha R, Qiu C, et al. Single-cell transcriptomics of the mouse kidney reveals potential cellular targets of kidney disease. Science. 2018;360(6390):758-763. doi:10.1126/science.aar2131(2)Adam M, Potter AS, Potter SS. Psychrophilic proteases dramatically reduce single-cell RNA-seq artifacts: a molecular atlas of kidney development. Development. 2017;144(19):3625-3632. doi:10.1242/de…
CD	atp6v1g3	Adam M, Potter AS, Potter SS. Psychrophilic proteases dramatically reduce single-cell RNA-seq artifacts: a molecular atlas of kidney development. Development. 2017;144(19):3625-3632. doi:10.1242/dev.151142
CD	atp6v1b1	Adam M, Potter AS, Potter SS. Psychrophilic proteases dramatically reduce single-cell RNA-seq artifacts: a molecular atlas of kidney development. Development. 2017;144(19):3625-3632. doi:10.1242/dev.151142
DCT	calb1	Park J, Shrestha R, Qiu C, et al. Single-cell transcriptomics of the mouse kidney reveals potential cellular targets of kidney disease. Science. 2018;360(6390):758-763. doi:10.1126/science.aar2131
DCT	slc12a3	(1)Park J, Shrestha R, Qiu C, et al. Single-cell transcriptomics of the mouse kidney reveals potential cellular targets of kidney disease. Science. 2018;360(6390):758-763. doi:10.1126/science.aar2131 (2)Clark JZ, Chen L, Chou CL, Jung HJ, Lee JW, Knepper MA. Representation and relative abundance of cell-type selective markers in whole-kidney RNA-Seq data. Kidney Int. 2019;95(4):787-796. doi:10.10…
DCT	pvalb	Park J, Shrestha R, Qiu C, et al. Single-cell transcriptomics of the mouse kidney reveals potential cellular targets of kidney disease. Science. 2018;360(6390):758-763. doi:10.1126/science.aar2131
LOH	Irx2	Lee JW, Chou CL, Knepper MA. Deep Sequencing in Microdissected Renal Tubules Identifies Nephron Segment-Specific Transcriptomes. J Am Soc Nephrol. 2015;26(11):2669-2677. doi:10.1681/ASN.2014111067
LOH	umod	Park J, Shrestha R, Qiu C, et al. Single-cell transcriptomics of the mouse kidney reveals potential cellular targets of kidney disease. Science. 2018;360(6390):758-763. doi:10.1126/science.aar2131
LOH	slc12a1	Clark JZ, Chen L, Chou CL, Jung HJ, Lee JW, Knepper MA. Representation and relative abundance of cell-type selective markers in whole-kidney RNA-Seq data. Kidney Int. 2019;95(4):787-796. doi:10.1016/j.kint.2018.11.028
PTB	hbb.bs	NA
PTB	hba.a2	NA
PTS1	slc5a2	Representation and relative abundance of cell-type selective markers in whole-kidney RNA-Seq data、Quantitative Proteomics of All 14 Renal Tubule Segments in Rat
PTS1	slc16a1	Limbutara K, Chou CL, Knepper MA. Quantitative Proteomics of All 14 Renal Tubule Segments in Rat. J Am Soc Nephrol. 2020;31(6):1255-1266. doi:10.1681/ASN.2020010071
PTS1	slc34a3	Limbutara K, Chou CL, Knepper MA. Quantitative Proteomics of All 14 Renal Tubule Segments in Rat. J Am Soc Nephrol. 2020;31(6):1255-1266. doi:10.1681/ASN.2020010071
PTS2	acaa1b	Park J, Shrestha R, Qiu C, et al. Single-cell transcriptomics of the mouse kidney reveals potential cellular targets of kidney disease. Science. 2018;360(6390):758-763. doi:10.1126/science.aar2131
PTS2	cndp2	Park J, Shrestha R, Qiu C, et al. Single-cell transcriptomics of the mouse kidney reveals potential cellular targets of kidney disease. Science. 2018;360(6390):758-763. doi:10.1126/science.aar2131
PTS2	nudt19	Park J, Shrestha R, Qiu C, et al. Single-cell transcriptomics of the mouse kidney reveals potential cellular targets of kidney disease. Science. 2018;360(6390):758-763. doi:10.1126/science.aar2131
PTS2	slc22a12	Park J, Shrestha R, Qiu C, et al. Single-cell transcriptomics of the mouse kidney reveals potential cellular targets of kidney disease. Science. 2018;360(6390):758-763. doi:10.1126/science.aar2131
PTS2	slc22a6	Limbutara K, Chou CL, Knepper MA. Quantitative Proteomics of All 14 Renal Tubule Segments in Rat. J Am Soc Nephrol. 2020;31(6):1255-1266. doi:10.1681/ASN.2020010071
PTS3	malat1	Grün D, Lyubimova A, Kester L, et al. Single-cell messenger RNA sequencing reveals rare intestinal cell types. Nature. 2015;525(7568):251-255. doi:10.1038/nature14966
PTS3	trim7	Park J, Shrestha R, Qiu C, et al. Single-cell transcriptomics of the mouse kidney reveals potential cellular targets of kidney disease. Science. 2018;360(6390):758-763. doi:10.1126/science.aar2131
PTS3	slc22a30	Park J, Shrestha R, Qiu C, et al. Single-cell transcriptomics of the mouse kidney reveals potential cellular targets of kidney disease. Science. 2018;360(6390):758-763. doi:10.1126/science.aar2131
PTS3	slc7a13	Park J, Shrestha R, Qiu C, et al. Single-cell transcriptomics of the mouse kidney reveals potential cellular targets of kidney disease. Science. 2018;360(6390):758-763. doi:10.1126/science.aar2131
PTS3	slc6a18	Park J, Shrestha R, Qiu C, et al. Single-cell transcriptomics of the mouse kidney reveals potential cellular targets of kidney disease. Science. 2018;360(6390):758-763. doi:10.1126/science.aar2131
