# Supplementary material for: Analysis of potential biomarkers for diabetic kidney disease based on single-cell RNA-sequencing integrated with a single-cell sequencing assay for transposase-accessible chromatin
Source: Aging (Albany NY). 2023 Oct 11;15(19):10681–704. doi: 10.18632/aging.205107 (PMC10599739; doi:10.18632/aging.205107)
Supplement: Supplementary Table 4 [file aging-15-205107-s005.xlsx]

## Sheet: 工作表1
Supplementary Table 4. Differentially expressed genes.
B cell						CD						DCT						endo						LOH						M1						M2						Neut						NK
	FC	P.value	FDR	pct1	pct2		FC	P.value	FDR	pct1	pct2		FC	P.value	FDR	pct1	pct2		FC	P.value	FDR	pct1	pct2		FC	P.value	FDR	pct1	pct2		FC	P.value	FDR	pct1	pct2		FC	P.value	FDR	pct1	pct2		FC	P.value	FDR	pct1	pct2		FC
Gpx3	1.89556	4.62489e-33	1.97298e-29	0.894737	0.522652	Kap	0.185411	6.60517e-07	0.00495652	0.15	0.5	Kap	0.288912	1.12024e-31	5.84989e-28	0.225152	0.582766	Ctsc	0.290114	1.31237e-06	0.0096958	0.191489	0.63964	Ier3	2.09684	8.41393e-25	6.20527e-21	0.826972	0.525641	Gpx3	2.03321	2.91944e-19	1.79428e-15	0.849515	0.544	Ddit4	19.101	1.55531e-11	7.54636e-08	0.363636	0.038961	Gpx3	2.36755	2.75632e-11	7.77282e-08	0.954545	0.481818	Rpl21	1.26196
Zfp36l2	1.93663	2.25777e-25	9.62939e-22	0.720648	0.489503	Ckmt1	0.702069	2.33847e-06	0.0175456	0.85	0.928571	Fth1	1.09012	1.26549e-14	6.60711e-11	0.991886	0.979592	Ifi27l2a	0.361029	8.99094e-06	0.0664161	0.361702	0.666667	Umod	0.841706	2.17203e-22	1.60166e-18	0.969466	0.957265	Lgals3bp	0.179934	4.65835e-13	2.86256e-09	0.0679612	0.338667	Tsc22d3	2.95917	6.66263e-11	3.23204e-07	0.688312	0.318182	Ifitm1	0.539245	6.04196e-09	1.70323e-05	0.681818	0.945455	Il7r	9.27316
Gsta2	19.6813	8.98525e-19	3.83131e-15	0.125506	0.00994475	Hsd17b14	0.0372354	5.3196e-06	0.0399076	0.025	0.285714	Tmsb4x	5.2407	2.17092e-14	1.13322e-10	0.225152	0.0521542	Arap3	9.20984	9.20705e-06	0.0680033	0.255319	0.027027	Sec14l1	2.16305	6.43996e-22	4.74818e-18	0.796438	0.440171	Cd74	0.505052	2.12861e-12	1.30782e-08	0.538835	0.744	Gpx3	1.78846	6.77752e-08	0.00032871	0.935065	0.545455	Aldob	2.99699	2.53712e-08	7.14959e-05	0.727273	0.272727	Msn	0.437001
Tsc22d3	1.20424	1.21275e-17	5.16996e-14	0.931174	0.907182	Hspe1	0.66521	1.20342e-05	0.0902683	0.75	0.9	Lpl	0.647301	3.37548e-14	1.76166e-10	0.567951	0.716553	Fosb	0.41115	1.06739e-05	0.078827	0.340426	0.738739	Pde10a	11.4578	3.81959e-19	2.8158e-15	0.338422	0.025641	Ifi27l2a	0.540624	2.25089e-12	1.38272e-08	0.485437	0.701333	Sult1a1	4.37494	2.78747e-07	0.00135164	0.363636	0.0974026	Lrg1	0.445977	3.51339e-07	0.000989723	0.454545	0.845455	Aldob	2.58882
Rpl21	1.11908	5.1766e-15	2.20627e-11	0.951417	0.956906	Chchd10	0.90163	1.93807e-05	0.145355	0.9875	0.985714	Calb1	1.43995	9.7818e-14	5.10414e-10	0.823529	0.653061	Plxnd1	5.02021	1.09957e-05	0.0811922	0.319149	0.0540541	Col5a2	0.000364252	1.48922e-18	1.0977e-14	0	0.183761	Oas1a	0.29665	5.04755e-12	3.1002e-08	0.121359	0.402667	Serinc3	1.44242	3.09926e-07	0.00150252	0.896104	0.701299	Wfdc17	0.0967276	1.51578e-06	0.00426845	0.0681818	0.481818	Pck1	5.00166
Aldob	1.89247	4.96389e-14	2.11511e-10	0.534413	0.272928	Ldhb	0.879954	2.12638e-05	0.159457	0.9875	0.985714	Defb1	1.15018	3.08768e-13	1.61084e-09	0.955375	0.92517	Gm12253	0.000304748	1.19957e-05	0.0885639	0	0.324324	Gls	2.33973	2.09605e-18	1.54479e-14	0.681934	0.367521	Ms4a6d	0.275202	5.46898e-12	3.3585e-08	0.116505	0.389333	Aldob	2.21927	6.17737e-07	0.00299417	0.584416	0.207792	Cxcr4	1.89548	2.0139e-06	0.00566914	0.840909	0.536364	Gzmb	0.377906
Rps29	1.07152	1.34045e-11	5.71031e-08	0.967611	0.962431	Actg1	0.829353	2.37144e-05	0.177811	0.9875	0.985714	Acsm3	0.0438576	3.15471e-11	1.6455e-07	0.00608519	0.102041	Apbb1ip	0.407853	1.5205e-05	0.112243	0.340426	0.693694	Fabp3	1.69096	5.18697e-18	3.82228e-14	0.888041	0.598291	Aldob	2.15239	9.78594e-12	6.00857e-08	0.572816	0.293333	Pde4b	2.36617	9.53189e-07	0.00461915	0.597403	0.272727	Chac1	12.6767	8.86931e-06	0.0249582	0.25	0.0272727	Actg1	0.860665
Junb	0.80236	1.68518e-11	7.1772e-08	0.842105	0.935912	S100g	2.35342	3.09847e-05	0.232292	0.65	0.314286	Hspe1	0.778196	2.33305e-10	1.21669e-06	0.711968	0.782313	Ctsz	0.645619	1.65087e-05	0.12185	0.702128	0.891892	Mt1	1.18324	6.10327e-17	4.49689e-13	0.992366	0.961538	H2-Eb1	0.311812	1.07865e-11	6.62183e-08	0.11165	0.389333	Per1	4.06308	3.32422e-06	0.0161058	0.350649	0.103896	Slfn4	0.43438	1.13424e-05	0.0319062	0.363636	0.790909	Actb	0.87739
Nr4a1	0.71794	3.55943e-11	1.5156e-07	0.659919	0.832044	Hsp90ab1	0.871402	3.6174e-05	0.27116	0.975	0.985714	Ivd	0.581037	6.47616e-10	3.37667e-06	0.393509	0.537415	Fth1	0.884191	1.83021e-05	0.135069	0.978723	0.972973	Kap	0.378992	3.51787e-16	2.59161e-12	0.287532	0.581197	H2-Aa	0.324754	3.23772e-11	1.98731e-07	0.140777	0.413333	Dusp1	1.65754	7.69289e-06	0.0372644	0.714286	0.487013	Ifitm3	0.474798	1.28909e-05	0.0362491	0.431818	0.790909	Rpl8	1.12655
Spp1	4.82481	1.24536e-10	5.30151e-07	0.117409	0.0232044	Scg5	3.39017	4.22829e-05	0.31691	0.4875	0.171429	Clu	0.764071	6.9514e-10	3.62377e-06	0.718053	0.818594	Irf7	0.521835	1.8875e-05	0.139279	0.553191	0.792793	Usp2	1.87293	3.74609e-16	2.75937e-12	0.745547	0.504274	Rps29	1.10731	3.85287e-11	2.36451e-07	0.907767	0.901333	Tgfbr1	1.85442	2.21922e-05	0.107477	0.675325	0.415584	Smox	0.183209	1.43797e-05	0.0404213	0.0909091	0.472727	Rps28	1.20076
Sesn1	1.87626	1.54989e-10	6.59634e-07	0.473684	0.299448	Ptp4a2	2.10284	5.79209e-05	0.434059	0.675	0.4	Chchd10	0.926987	1.05441e-09	5.49557e-06	0.933063	0.936508	Uaca	18.5579	2.04159e-05	0.150628	0.212766	0.018018	Arrdc3	2.84852	6.97964e-16	5.14051e-12	0.549618	0.273504	Plac8	0.635538	4.37908e-11	2.687e-07	0.601942	0.754667	Rgs1	1.94745	2.53224e-05	0.122611	0.649351	0.396104	Lcn2	0.407206	1.51175e-05	0.0424801	0.340909	0.7	Lgals1	0.675553
Txnip	1.46138	2.18912e-10	9.3147e-07	0.700405	0.545856	Klk1	1.93193	5.89182e-05	0.441474	0.6875	0.285714	Kng2	1.12906	1.1895e-09	6.19848e-06	0.912779	0.891156	Tyrobp	0.67156	2.08673e-05	0.153938	0.553191	0.765766	Oxct1	0.847897	1.92998e-15	1.42123e-11	0.951654	0.940171	Tsc22d3	1.43378	6.0403e-11	3.70573e-07	0.791262	0.717333	Mtmr9	7.73846	2.73888e-05	0.132589	0.194805	0.0324675	Fcer1g	0.879805	5.00345e-05	0.140547	1	0.990909	Gm8797	0.408943
Gm8797	0.596878	5.85077e-10	2.48892e-06	0.37247	0.657459	Rsu1	0.23397	9.21025e-05	0.690032	0.05	0.285714	Ugt2b38	0.209058	1.20896e-09	6.29869e-06	0.0324544	0.142857	Tspan18	18.7109	2.11858e-05	0.156266	0.212766	0.018018	Tob1	1.78489	3.71249e-15	2.73351e-11	0.78626	0.538462	Ms4a4c	0.427202	2.12365e-10	1.30265e-06	0.276699	0.514667	Ap1g2	4.56865	2.88649e-05	0.139706	0.272727	0.0779221	H2-Q10	0.00016771	5.2664e-05	0.14788	0	0.3	Rpl35a	1.17216
Hsp90ab1	0.831138	7.09455e-10	3.01731e-06	0.82996	0.900552	Bptf	2.90182	0.000124419	0.932025	0.475	0.171429	Defb11	5.84104	2.28419e-09	1.18983e-05	0.123732	0.0204082	Sox18	4.19214	2.42987e-05	0.179203	0.382979	0.108108	Per1	4.28902	4.04508e-15	2.97799e-11	0.402036	0.111111	Fcgr1	0.256866	4.46542e-10	2.73864e-06	0.0776699	0.309333	Mef2c	1.83235	3.24913e-05	0.157225	0.662338	0.435065	S100a9	0.931186	7.0833e-05	0.198828	1	1	Gzma	0.776129
Pck1	2.14356	4.16104e-09	1.76928e-05	0.291498	0.131492	Pkd2	2.91421	0.00014597	1	0.4875	0.214286	Slc8a1	3.0651	6.87842e-09	3.58228e-05	0.198783	0.0680272	Fam167b	6.71268	2.60205e-05	0.191875	0.276596	0.045045	Wfdc15b	0.824002	1.53779e-14	1.13196e-10	0.913486	0.940171	Ms4a6b	0.499343	7.53866e-10	4.6227e-06	0.359223	0.586667	Rbm39	1.65523	3.70923e-05	0.179452	0.74026	0.5	Hao2	5.92606	7.79456e-05	0.218715	0.295455	0.0636364	Gpx3	1.9392
H2-Aa	1.05857	9.8116e-09	4.17091e-05	0.983806	0.976796	Bdh1	0.320211	0.000160417	1	0.125	0.4	Gpx3	1.19493	1.57387e-08	8.19515e-05	0.941176	0.882086	Cd9	3.48297	3.23001e-05	0.238149	0.425532	0.126126	Etfb	1.75692	2.51045e-14	1.84769e-10	0.763359	0.512821	Rpl35a	1.12297	9.26919e-10	5.68294e-06	0.902913	0.882667	Ifitm3	0.561535	5.03601e-05	0.243592	0.480519	0.694805	Tsc22d3	1.57785	9.52184e-05	0.267088	0.863636	0.681818	Rpl41	1.25344
Gm42418	1.06507	1.59555e-08	6.78111e-05	0.995951	0.998895	Lars2	1.58449	0.000182668	1	0.875	0.657143	Defb2	4.79197	1.64188e-08	8.54761e-05	0.135903	0.031746	Npr1	6.54459	3.41734e-05	0.251926	0.276596	0.045045	Pim3	1.69642	1.06815e-13	7.86053e-10	0.801527	0.57265	Il1b	0.68595	9.98468e-10	6.12061e-06	0.679612	0.826667	Zfp36l1	1.72476	5.1878e-05	0.250882	0.688312	0.474026	Per1	2.77789	9.60105e-05	0.269213	0.5	0.209091	Prf1	0.66927
Ubc	0.801187	1.86375e-08	7.91908e-05	0.744939	0.858564	Phb	0.717457	0.000184681	1	0.8125	0.9	Pgam2	1.32314	1.69374e-08	8.8159e-05	0.782961	0.630385	Adcy4	1855.04	3.48495e-05	0.256876	0.148936	0	Mrps6	0.832057	1.19045e-13	8.75931e-10	0.928753	0.935897	Ldlr	0.343605	1.44356e-09	8.84758e-06	0.140777	0.381333	Tecr	2.01153	5.79615e-05	0.280244	0.558442	0.311688	Dbi	2.57758	9.86857e-05	0.276616	0.522727	0.209091	Thy1	3.0107
Hist1h2ap	2.28307	3.85072e-08	0.000163579	0.283401	0.142541	Hnrnpa2b1	0.784156	0.000194164	1	0.875	0.9	Egln1	2.16157	2.44351e-08	0.00012716	0.267748	0.117914	Id3	2.78142	3.57671e-05	0.263603	0.553191	0.261261	Gadd45g	1.74844	4.58557e-13	3.3736e-09	0.793893	0.529915	Mdm1	2.68457	1.83761e-09	1.12609e-05	0.354369	0.144	Sh3bp2	2.62822	5.85983e-05	0.283264	0.38961	0.168831	Gsta2	58.449	0.000141026	0.395156	0.159091	0.00909091	Itgb2	0.739117
mt-Co1	1.046	7.95333e-08	0.000337778	1	0.998895	Mrpl15	0.466476	0.000211683	1	0.375	0.614286	Cbs	0.186127	3.1047e-08	0.000161537	0.0263692	0.117914	Cd180	0.334989	3.74355e-05	0.275862	0.212766	0.567568	Klk1	1.23552	5.56633e-13	4.09459e-09	0.966921	0.880342	H2-Ab1	0.351424	1.84054e-09	1.1277e-05	0.160194	0.397333	Inpp5d	1.87092	0.000121313	0.586305	0.558442	0.318182	S100a11	0.877829	0.00014499	0.406118	1	0.990909	Rps27a	1.12175
Rpl35a	1.06732	1.8186e-07	0.000772178	0.959514	0.960221	Actb	0.819753	0.000228054	1	0.8875	0.928571	D10Jhu81e	0.687975	4.48199e-08	0.000233153	0.488844	0.609977	Pltp	0.569036	4.70959e-05	0.347003	0.553191	0.846847	Mfsd7b	3.14639	6.54807e-13	4.8161e-09	0.435115	0.175214	Rps28	1.10115	2.08106e-09	1.27486e-05	0.873786	0.869333	Lpar6	2.12907	0.000124989	0.603948	0.506494	0.292208	Lcp1	0.845265	0.000168888	0.472886	0.954545	0.990909	Gm21092	4.47788
Hao2	2.49046	3.1348e-07	0.00133072	0.210526	0.0939227	Sbf2	4.29515	0.00024545	1	0.35	0.1	Rps29	1.09399	6.66872e-08	0.00034684	0.870183	0.875283	Ctla2a	4.58621	4.92668e-05	0.362949	0.297872	0.0540541	Gm8797	0.49389	6.73936e-13	4.95613e-09	0.356234	0.619658	Insig1	0.368077	4.77025e-09	2.92178e-05	0.11165	0.341333	Txnip	1.66923	0.000173653	0.838917	0.701299	0.506494	Tspo	0.562549	0.000170388	0.476917	0.5	0.772727	Aven	9.30683
Ppp1r21	3.64882	3.26548e-07	0.00138587	0.161943	0.0651934	Per1	4.77711	0.000258954	1	0.3375	0.1	mt-Co1	1.0458	7.55674e-08	0.000392951	0.993915	0.988662	Scimp	0.319599	4.93188e-05	0.363282	0.212766	0.54955	Coq10b	2.88662	7.38834e-13	5.43264e-09	0.452926	0.175214	Gm8797	0.58169	6.83406e-09	4.18518e-05	0.373786	0.666667	Trim8	3.59539	0.000198751	0.959966	0.25974	0.0844156	Fbp1	3.16134	0.000202047	0.565328	0.409091	0.145455	Inpp5e	5.51906
Ier2	0.779442	4.43716e-07	0.00188269	0.700405	0.828729	Serpinb9	0.556202	0.000263447	1	0.575	0.771429	Glod5	0.568878	1.14078e-07	0.000593094	0.269777	0.417234	Gapt	0.355894	5.31133e-05	0.391179	0.212766	0.576577	Gm26917	2.40696	7.64387e-13	5.61977e-09	0.53944	0.252137	Ddit4	2.43123	1.00743e-08	6.16849e-05	0.383495	0.176	Pmp22	3.74434	0.000227672	1	0.233766	0.0649351	Gpcpd1	1.34837	0.000234039	0.654607	0.863636	0.781818	Irf8	0.587413
mt-Atp8	1.0505	6.71874e-07	0.00285009	1	1	Tubb4b	0.49649	0.000273788	1	0.4375	0.614286	Usp2	1.59369	1.81296e-07	0.000942376	0.505071	0.349206	Gimap5	7.09511	5.66681e-05	0.417304	0.276596	0.0540541	Tmprss2	1.86069	1.56527e-12	1.15063e-08	0.6743	0.42735	H2-DMb1	0.308973	1.15554e-08	7.07422e-05	0.11165	0.322667	Gpr65	1.83906	0.000228411	1	0.571429	0.344156	Ly6g	0.000218	0.000251924	0.704379	0	0.254545	Ly6e	1.56474
Car2	2.61279	9.43082e-07	0.00399961	0.182186	0.078453	Nucb1	2.29564	0.000300294	1	0.55	0.285714	AY036118	1.23254	2.21041e-07	0.00114875	0.831643	0.789116	Vimp	0.494755	6.11405e-05	0.450178	0.425532	0.783784	Wnk1	1.69257	1.59449e-12	1.17195e-08	0.788804	0.512821	Ly6e	0.81755	1.95865e-08	0.000119889	0.820388	0.885333	Xiap	3.41148	0.000259864	1	0.246753	0.0714286	Oasl2	0.313783	0.000303857	0.84928	0.159091	0.490909	Klre1	0.603522
Gm10260	1.26734	1.43229e-06	0.00607292	0.696356	0.650829	Rassf3	9.24223	0.000301375	1	0.25	0.0428571	Gadd45g	1.7352	2.51263e-07	0.00130556	0.442191	0.285714	Ptprm	20.7122	6.70564e-05	0.493669	0.170213	0.00900901	Dpm1	5.57751	1.95491e-12	1.43666e-08	0.29771	0.0641026	Zbp1	0.384783	3.13936e-08	0.000192129	0.145631	0.365333	Cttnbp2nl	2.1278	0.000267465	1	0.415584	0.201299	Ifitm2	0.854742	0.000435562	1	0.977273	0.981818	Hoga1	18.1692
Kap	0.584813	2.63605e-06	0.0111742	0.368421	0.538122	Scap	5.77261	0.000303349	1	0.2625	0.0428571	Kctd12	2.75981	2.52822e-07	0.00131341	0.190669	0.0748299	Robo4	16.0831	7.55521e-05	0.556139	0.170213	0.00900901	AI317395	1.91136	2.56929e-12	1.88792e-08	0.643766	0.376068	Bst2	0.469732	3.33687e-08	0.000204183	0.271845	0.498667	Lmbrd2	43.3356	0.000295124	1	0.103896	0.00649351	Ly6e	0.491819	0.000714708	1	0.340909	0.654545	Nr4a1	0.473082
Cxcr4	1.36676	3.34626e-06	0.0141815	0.631579	0.498343	Atp5g3	0.914449	0.000305285	1	1	1	S100g	1.45345	2.59851e-07	0.00134967	0.618661	0.435374	H2-Ab1	0.569486	7.73795e-05	0.569513	0.468085	0.72973	Rps29	1.23053	2.57892e-12	1.89473e-08	0.954198	0.867521	Tmem176a	0.416511	3.66734e-08	0.000224368	0.247573	0.445333	Hexb	1.30632	0.000405955	1	0.896104	0.746753	S100a8	0.904447	0.000821184	1	1	1	Ccdc6	9.87854
Rilpl2	0.467902	5.07921e-06	0.0215206	0.11336	0.255249	Ndufs5	0.845133	0.000327745	1	0.9375	0.942857	Bdh1	0.593795	2.87006e-07	0.00149042	0.298174	0.433107	Gpx3	1.69119	7.77017e-05	0.571807	0.851064	0.558559	Ptms	1.53106	3.33915e-12	2.45294e-08	0.847328	0.611111	Hist1h2ap	3.70852	4.16536e-08	0.000254795	0.257282	0.096	Gmip	2.31115	0.000434171	1	0.428571	0.233766	Igfbp6	0.0740752	0.000876023	1	0.0227273	0.254545	Gm10260	1.56324
Dnaja1	0.617985	5.8402e-06	0.0247391	0.279352	0.448619	Idh3a	0.657651	0.000337044	1	0.6875	0.828571	Ckb	0.810402	3.28448e-07	0.0017053	0.752535	0.836735	Cpd	7.20664	7.95316e-05	0.585193	0.255319	0.045045	Atp4a	2.33988	3.67612e-12	2.70011e-08	0.506361	0.213675	Ms4a4a	0.367327	4.62254e-08	0.000282714	0.140777	0.349333	Zfp36	1.45632	0.00045306	1	0.74026	0.525974	Myd88	0.47023	0.00096421	1	0.295455	0.627273	Prrt1	3.94806
Fbp1	1.63794	8.88227e-06	0.0376164	0.279352	0.148066	Gtpbp2	4.24965	0.000349897	1	0.3125	0.0714286	Cyp4b1	0.204996	3.55587e-07	0.00184585	0.0567951	0.151927	Id1	3.57861	8.04713e-05	0.592027	0.361702	0.0990991	Gpx3	1.49739	4.34084e-12	3.18791e-08	0.900763	0.529915	Dynll1	0.670887	5.44867e-08	0.000333186	0.567961	0.741333	Uvrag	2.2651	0.000470806	1	0.38961	0.188312	Kap	0.471764	0.0010758	1	0.318182	0.627273	Metap1	3.97494
Cd180	0.498598	1.0076e-05	0.0426616	0.157895	0.293923	Litaf	0.543509	0.000360392	1	0.4375	0.728571	Nfe2l1	1.48407	4.03214e-07	0.00209268	0.535497	0.353741	Plscr4	7.09492	0.000100641	0.740312	0.234043	0.036036	Abhd17c	2.36167	4.86683e-12	3.57371e-08	0.513995	0.24359	Isg15	0.322261	5.87364e-08	0.000359114	0.116505	0.32	Il10ra	1.55579	0.000482955	1	0.727273	0.506494	Ass1	2.31328	0.00112246	1	0.431818	0.190909	Klra3	0.394943
Dnajb1	0.542149	1.50591e-05	0.0637451	0.174089	0.320442	Mdh1	0.873081	0.000381712	1	0.9625	0.985714	Hsp90ab1	0.894779	5.00416e-07	0.00259666	0.870183	0.886621	Nedd8	1.58991	0.000101201	0.744334	0.851064	0.684685	Hoxd8	1.75047	7.96128e-12	5.84517e-08	0.704835	0.410256	Mrpl52	0.652842	7.25987e-08	0.000443796	0.514563	0.722667	Tor4a	2.79515	0.000490843	1	0.25974	0.0909091	Klf3	1.85847	0.00125123	1	0.590909	0.372727	Rpl15	1.1542
Hs3st1	1.75629	1.51352e-05	0.0640521	0.303644	0.18453	Map3k8	1178.95	0.000450386	1	0.1625	0	Cox7c	1.06218	5.22744e-07	0.002712	0.957404	0.941043	Grn	0.750875	0.000102006	0.750152	0.829787	0.918919	Wnt10a	11.7029	7.97708e-12	5.85597e-08	0.221374	0.0213675	Pck1	2.83525	7.80927e-08	0.000477303	0.276699	0.104	Mbd6	5.69631	0.000521489	1	0.168831	0.038961	Rps28	1.84845	0.00126705	1	0.590909	0.354545	Ass1	2.36088
H2-Q6	0.53972	1.55903e-05	0.0659625	0.17004	0.313812	Mtx2	0.544177	0.000477587	1	0.4375	0.671429	Ces1d	0.338186	5.63462e-07	0.00292268	0.0547667	0.151927	Grrp1	9.03468	0.000108533	0.798043	0.191489	0.018018	Slc25a30	1.87433	2.31992e-11	1.70282e-07	0.661578	0.431624	Rtp4	0.283411	9.09312e-08	0.00055568	0.0728155	0.258667	Phlda1	2.51192	0.000529874	1	0.337662	0.142857	Yeats4	7.19425	0.00129992	1	0.204545	0.0454545	Fxyd2	2.41495
Rps28	1.05494	1.78129e-05	0.0753487	0.959514	0.954696	Creb3l2	3.09959	0.000524871	1	0.3625	0.114286	Slc25a5	0.913962	6.67915e-07	0.00346381	0.916836	0.936508	Ephb4	3.67847	0.000109123	0.802271	0.319149	0.0720721	Hnrnpa0	3.29268	2.59179e-11	1.90211e-07	0.335878	0.0982906	Id2	1.9966	9.34304e-08	0.00057086	0.5	0.317333	Ercc5	4.5066	0.000530064	1	0.168831	0.038961	Jund	1.44148	0.00131672	1	0.840909	0.681818	Ckb	3.80174
H2-Ob	0.755691	2.55113e-05	0.107887	0.530364	0.634254	Wnk1	1.87562	0.00053698	1	0.7	0.428571	Ndufa3	1.1087	7.66407e-07	0.00397382	0.882353	0.85941	H2-Eb1	0.517435	0.00011381	0.836619	0.446809	0.684685	Atp6v1a	1.37988	2.66061e-11	1.95235e-07	0.872774	0.717949	Spon1	0.107366	9.57908e-08	0.000585186	0.0145631	0.16	Akr1c21	2.00349	0.000549805	1	0.376623	0.155844	Stfa2l1	2.13032	0.0013201	1	0.522727	0.245455	Tmem176b	2.40351
Hist1h2bc	1.52375	2.69113e-05	0.113781	0.437247	0.313812	Rap1gap	1.64824	0.000606106	1	0.725	0.528571	E530001K10Rik	2.6743	1.09128e-06	0.00565719	0.186613	0.0793651	Cd52	0.552548	0.000120128	0.882944	0.489362	0.756757	Hoxd9	2.23189	5.08758e-11	3.73276e-07	0.501272	0.235043	Cyp51	0.258139	1.20253e-07	0.000734507	0.0582524	0.234667	Tmem119	1.98313	0.000565946	1	0.441558	0.227273	Wfdc21	0.637479	0.00135235	1	0.590909	0.772727	Tmbim6	0.742535
Ifi27l2a	0.675172	3.22735e-05	0.13642	0.360324	0.509392	Dst	1.77303	0.000609633	1	0.7	0.414286	Egf	0.911851	1.59473e-06	0.0082655	0.902637	0.936508	Rnf146	2.809	0.000120687	0.886927	0.489362	0.198198	Ndufc2	0.824092	5.49403e-11	4.03042e-07	0.86514	0.888889	Kap	0.558193	1.3128e-07	0.000801728	0.276699	0.549333	AY036118	1.57529	0.000670618	1	0.779221	0.551948	Fgl2	1.49747	0.00141642	1	0.818182	0.590909	Guca2b	5.45173
H2-D1	0.928666	3.42539e-05	0.144757	0.955466	0.974586	Chchd4	0.454484	0.000651048	1	0.2875	0.542857	Ly6a	0.915525	1.72621e-06	0.00894521	0.89858	0.92517	Kank4	1654.59	0.000133953	0.984287	0.12766	0	Kctd1	2.14666	9.50193e-11	6.96967e-07	0.529262	0.277778	Plbd1	0.746937	1.51958e-07	0.000927858	0.669903	0.786667	Atpaf2	4.1139	0.000689194	1	0.12987	0.0194805	Smpdl3a	0.0962009	0.00146477	1	0.0227273	0.245455	Gm3839	2.13959
Dbi	1.43426	3.53394e-05	0.149309	0.461538	0.311602	Ptprf	2.21176	0.000675525	1	0.525	0.257143	Cyp2e1	0.311899	2.13716e-06	0.0110726	0.0527383	0.142857	Lmcd1	4.93645	0.000134253	0.986357	0.255319	0.045045	Bckdhb	0.564962	1.07064e-10	7.85208e-07	0.486005	0.666667	Ifitm3	0.906871	1.61252e-07	0.000984442	0.834951	0.845333	Cd14	1.45635	0.000703179	1	0.779221	0.584416	Hcst	1.54559	0.00155315	1	0.75	0.536364	Zfp36l2	1.2055
Rpl41	1.08997	3.68055e-05	0.155467	0.910931	0.893923	Hsp90aa1	0.722081	0.000695691	1	0.7625	0.771429	Fkbp4	0.690052	3.84902e-06	0.0199379	0.397566	0.521542	Bst2	0.769445	0.000137448	1	0.829787	0.936937	Glo1	0.754397	1.1327e-10	8.30608e-07	0.798982	0.816239	Oas2	0.119481	2.04512e-07	0.00124834	0.00970874	0.144	Pirb	1.84366	0.000735465	1	0.506494	0.272727	Sgms1	2.88475	0.00188899	1	0.363636	0.154545	Vamp5	3.6903
Egr1	0.391606	4.03549e-05	0.170419	0.0728745	0.18011	Gabarap	0.775078	0.000817791	1	0.85	0.9	Gm8797	0.595718	3.89435e-06	0.0201689	0.227181	0.356009	Cnn3	3.06308	0.000141967	1	0.404255	0.135135	Aif1l	1.3169	1.81485e-10	1.33065e-06	0.898219	0.769231	Tspan13	0.495698	2.07643e-07	0.00126724	0.247573	0.469333	Spn	2.23086	0.000810382	1	0.376623	0.181818	Chil1	0.327677	0.00211506	1	0.113636	0.381818	Gimap3	1.31439
Pik3ip1	1.91415	4.37551e-05	0.184734	0.242915	0.142541	Sgk1	3.39751	0.000848199	1	0.4	0.171429	Ephx1	2.03431	3.92084e-06	0.0203021	0.206897	0.0952381	Mmrn2	3.45895	0.000153855	1	0.340426	0.0900901	Slc43a2	1.72987	2.70882e-10	1.98584e-06	0.651399	0.393162	Il2rg	0.597628	2.23528e-07	0.00136397	0.383495	0.605333	Grap	3.9279	0.000865391	1	0.155844	0.0324675	Rpl11	1.59705	0.00218695	1	0.636364	0.454545	Adgre5	0.654928
Gm3839	1.74541	4.41268e-05	0.186259	0.319838	0.20884	Krt7	0.786177	0.000940854	1	0.875	0.914286	Actg1	0.892925	4.55398e-06	0.0235759	0.884381	0.900227	Cd74	0.659352	0.0001556	1	0.574468	0.765766	Slc3a2	2.0134	2.73966e-10	2.00817e-06	0.552163	0.311966	Hspa1b	0.305953	2.57214e-07	0.00156927	0.0485437	0.216	Adcy7	2.72298	0.000878098	1	0.298701	0.12987	Zfp706	0.215874	0.0022357	1	0.0454545	0.281818	Rpl6	1.13892
Hist1h1c	1.54993	4.66004e-05	0.196654	0.417004	0.293923	Chchd2	0.91688	0.000947605	1	1	0.985714	Wfdc2	0.78564	5.61574e-06	0.0290671	0.638945	0.730159	Klk1	0.483038	0.000157413	1	0.446809	0.693694	Ucp2	2.45821	2.76062e-10	2.02326e-06	0.430025	0.183761	Lars2	1.40161	3.12559e-07	0.00190661	0.830097	0.672	Tnfaip8l2	1.73903	0.000880541	1	0.441558	0.227273	Pdcl	5.59288	0.00235145	1	0.181818	0.0363636	Gprin3	6.03198
Shisa5	0.916671	5.31906e-05	0.224411	0.898785	0.924862	Rps2	0.851044	0.00101101	1	0.925	0.928571	Rps21	1.13479	5.89087e-06	0.0304852	0.837728	0.789116	Lair1	0.593683	0.000157944	1	0.510638	0.756757	Rab6b	1.93138	3.20207e-10	2.34647e-06	0.549618	0.282051	Srebf2	0.391512	3.26106e-07	0.00198892	0.121359	0.317333	B3galnt1	2.86123	0.000919601	1	0.220779	0.0714286	Metrnl	2.84886	0.00243488	1	0.340909	0.136364	Ccl3	0.476312
Cacybp	0.517769	5.90389e-05	0.249026	0.129555	0.255249	Clu	2.02238	0.00102229	1	0.5875	0.328571	Cyb5rl	1.60277	5.92737e-06	0.0306682	0.399594	0.260771	Mgll	5.21479	0.000169875	1	0.319149	0.0900901	Gm10260	1.73816	3.62649e-10	2.65713e-06	0.666667	0.423077	Tmem176b	0.514317	3.31544e-07	0.00202176	0.325243	0.506667	Fxyd5	1.27744	0.000966867	1	0.857143	0.753247	Lilr4b	0.695213	0.00247389	1	0.636364	0.845455	Kctd2	4.85271
Fam107b	1.24421	7.73032e-05	0.325988	0.651822	0.58453	mt-Co1	1.14601	0.00108301	1	1	0.928571	Rpl37a	1.12224	6.04632e-06	0.0312776	0.855984	0.816327	Lars2	1.88206	0.000197485	1	0.723404	0.495495	Rbm3	1.64209	3.90147e-10	2.85822e-06	0.699746	0.470085	Pdia3	0.696006	3.37311e-07	0.00205658	0.587379	0.72	F11r	2.13803	0.00100215	1	0.402597	0.214286	Ifi27l2a	0.220412	0.002531	1	0.0681818	0.3	Cxcr4	3.05882
Trmt112	0.731352	8.51304e-05	0.35891	0.441296	0.594475	Atp5j2	0.910897	0.00109044	1	1	1	Fh1	0.71929	6.48062e-06	0.0335178	0.478702	0.571429	Cyba	0.74734	0.000206686	1	0.829787	0.918919	Tob2	2.59547	5.79516e-10	4.24496e-06	0.440204	0.230769	Actb	0.957626	3.51425e-07	0.00214229	0.970874	0.965333	Rps28	1.15797	0.0010138	1	0.987013	0.915584	Isg20	0.232138	0.00271721	1	0.0681818	0.3	Tmx1	0.146669
Ezr	0.815165	0.00010752	0.453199	0.65587	0.755801	Idh3b	0.807127	0.00112188	1	0.85	0.857143	Cutc	0.34546	6.87664e-06	0.0355591	0.0446247	0.124717	Sec11c	0.667273	0.00021645	1	0.659574	0.774775	Nr4a1	3.21537	9.1471e-10	6.69934e-06	0.340967	0.123932	Fdps	0.352493	3.82928e-07	0.00233395	0.11165	0.296	Lifr	1.96243	0.00105033	1	0.428571	0.246753	Raf1	1.77431	0.00281157	1	0.568182	0.345455	mt-Co1	1.09751
Odc1	0.397086	0.000143646	0.605324	0.0850202	0.18232	Uqcrc1	0.797599	0.00112363	1	0.8625	0.9	Itpkb	1.90857	8.27138e-06	0.042763	0.219067	0.106576	Tspan12	7.87921	0.000223645	1	0.234043	0.045045	Fam107b	1.69177	1.0101e-09	7.39696e-06	0.666667	0.457265	Cxcr4	1.56011	4.44814e-07	0.00271069	0.679612	0.525333	Timm44	3.11818	0.0010607	1	0.285714	0.123377	Ccr1	0.648408	0.00298046	1	0.545455	0.809091	Atg4d	0.111204
mt-Co3	1.04248	0.000144363	0.608201	1	1	Sil1	5.89508	0.00122717	1	0.2625	0.0714286	Slc25a11	0.736771	8.48248e-06	0.0438459	0.482759	0.573696	Pde4a	0.195257	0.000231102	1	0.0851064	0.369369	Mt2	1.45923	1.23549e-09	9.04623e-06	0.844784	0.645299	Myof	0.322481	4.79358e-07	0.00292073	0.0582524	0.226667	P2ry6	1.5331	0.00115996	1	0.675325	0.512987	Sertad1	0.268658	0.003029	1	0.0909091	0.327273	Rpl13	1.08396
Ms4a4c	0.65023	0.00016014	0.674509	0.255061	0.390055	Slc25a39	0.814816	0.00129869	1	0.9	0.928571	Rpl41	1.13436	8.58438e-06	0.0443641	0.866126	0.816327	Nipbl	0.360108	0.000235152	1	0.212766	0.540541	Etnk1	1.45398	2.59553e-09	1.90019e-05	0.804071	0.598291	Epsti1	0.600841	5.26976e-07	0.00321034	0.368932	0.578667	Cst3	1.09811	0.00118925	1	1	0.954545	Sord	2.3982	0.00303757	1	0.363636	0.145455	Eif4g2	0.627425
Erp29	0.725558	0.000165091	0.695196	0.376518	0.516022	S100a11	0.816857	0.00132713	1	0.9125	0.957143	mt-Nd3	1.33107	8.87967e-06	0.0458812	0.655172	0.573696	Anxa1	4.02	0.0002451	1	0.276596	0.0630631	Sik1	3.77897	2.87693e-09	2.10591e-05	0.267176	0.0726496	Ctss	0.890957	6.02045e-07	0.00366706	0.839806	0.84	Foxn3	2.53201	0.00129192	1	0.246753	0.0909091	Arpc5	0.641978	0.00305634	1	0.545455	0.790909	Klrb1c	0.5123
Fxyd2	1.36624	0.000165648	0.697377	0.40081	0.266298	Zfp384	6.33503	0.00134381	1	0.225	0.0428571	Atp6v0a4	0.708332	9.33939e-06	0.0482473	0.456389	0.557823	Cav2	4.86367	0.000259876	1	0.297872	0.0810811	Rogdi	1.76006	3.00628e-09	2.20029e-05	0.610687	0.367521	Clic4	0.496539	7.46704e-07	0.00454743	0.218447	0.434667	5430416N02Rik	8.84476	0.00134155	1	0.116883	0.0194805	Tnip2	4.84014	0.003087	1	0.159091	0.0272727	Hist1h2ap	2.94341
Serinc3	1.12177	0.000177267	0.746116	0.870445	0.834254	Skp1a	0.702391	0.00134787	1	0.7375	0.757143	Wfdc15b	1.09978	9.9918e-06	0.0516077	0.851927	0.857143	Cyb561a3	0.612665	0.000261207	1	0.531915	0.783784	Rgs2	3.21029	3.50025e-09	2.56149e-05	0.287532	0.0854701	Nr4a2	0.431375	7.85155e-07	0.00478081	0.18932	0.384	Cdk6	2.0938	0.00135605	1	0.376623	0.194805	Ctsb	0.36674	0.00317609	1	0.159091	0.418182	Etfb	3.28956
Arhgap31	2.09882	0.000188457	0.793026	0.182186	0.100552	Atp4a	2.4483	0.00137803	1	0.4625	0.242857	Rps28	1.2011	1.00343e-05	0.0518172	0.803245	0.712018	Cfp	0.398889	0.000283847	1	0.212766	0.54955	Emc6	1.36879	4.45682e-09	3.26106e-05	0.804071	0.675214	Hexb	0.581702	9.20605e-07	0.00560464	0.393204	0.565333	Trio	8.80495	0.00139573	1	0.103896	0.012987	Crlf3	0.103519	0.00318302	1	0.0227273	0.218182	Klra4	0.000217217
AY036118	1.24979	0.000217476	0.914922	0.748988	0.667403	Zzz3	5.15537	0.00141042	1	0.2625	0.0714286	Figf	1.7131	1.04025e-05	0.0537083	0.223124	0.106576	Prex2	13.6294	0.000317745	1	0.170213	0.018018	Fth1	1.08632	4.71916e-09	3.45254e-05	1	0.974359	Ifi47	0.376935	1.01098e-06	0.00615382	0.135922	0.317333	Herpud1	1.61987	0.00141129	1	0.623377	0.422078	Egr1	0.616576	0.00344638	1	0.5	0.781818	Fech	3.67913
Gimap5	1.49058	0.000227169	0.955472	0.352227	0.243094	Atp5a1	0.90143	0.00145652	1	0.9875	0.985714	Ubc	0.871234	1.16683e-05	0.0602318	0.8357	0.863946	Rin2	13.4513	0.000317745	1	0.170213	0.018018	Cd36	4.79445	5.61296e-09	4.10588e-05	0.239186	0.0598291	Itgax	0.351331	1.1258e-06	0.00685159	0.101942	0.274667	Kap	0.537241	0.00154383	1	0.402597	0.597403	Vim	0.587963	0.00360706	1	0.431818	0.690909	Vimp	0.299199
E130102H24Rik	1.92369	0.000242263	1	0.161943	0.0828729	Mdh2	0.854092	0.00147321	1	0.9375	0.928571	Sgsm1	2.73149	1.28297e-05	0.0662139	0.119675	0.0408163	Prkaa1	10.6236	0.000325994	1	0.191489	0.027027	Egfl6	0.388259	6.10978e-09	4.4687e-05	0.155216	0.350427	Ppt1	0.597505	1.31465e-06	0.00799963	0.368932	0.576	Calhm2	2.52529	0.00154868	1	0.298701	0.136364	Gda	0.680989	0.00366354	1	0.545455	0.727273	Fcer1g	0.895954
Jund	0.824258	0.000317898	1	0.672065	0.78895	Sh3glb2	2.1512	0.00151469	1	0.3875	0.142857	Oxct1	0.930872	1.43399e-05	0.0739938	0.933063	0.947846	Tie1	3.69092	0.000327506	1	0.297872	0.0720721	Gm20518	2.26072	9.05915e-09	6.62495e-05	0.427481	0.205128	Dok2	0.127069	1.61935e-06	0.00985211	0.0291262	0.16	Carhsp1	2.59044	0.00155239	1	0.25974	0.103896	Rpl24	1.81405	0.00397827	1	0.568182	0.345455	Cd48	0.600876
H2-Q7	0.565503	0.000336809	1	0.157895	0.267403	Foxo3	3.66458	0.00152853	1	0.275	0.0714286	Gm42418	1.05343	1.48218e-05	0.0764655	1	1	Sult1a1	4.44435	0.000331974	1	0.234043	0.045045	Lpl	0.765897	9.65492e-09	7.05968e-05	0.773537	0.747863	Tuba1c	0.640528	1.68019e-06	0.0102206	0.38835	0.624	Atp6ap2	1.81196	0.00158682	1	0.519481	0.318182	Khk	2.98028	0.00400182	1	0.318182	0.145455	Khk	2.32327
Slc43a2	1.82652	0.000341812	1	0.182186	0.101657	Smg1	3.00297	0.00160413	1	0.3125	0.1	Ltc4s	1.98581	1.51865e-05	0.0783322	0.180527	0.0816327	Lmo4	0.308313	0.000333658	1	0.12766	0.432432	Mdm2	2.1937	1.28914e-08	9.42487e-05	0.407125	0.183761	Neat1	1.3407	1.69322e-06	0.0102982	0.864078	0.776	Cd9	1.82612	0.00160727	1	0.428571	0.227273	Arhgap31	2.94215	0.00403334	1	0.272727	0.0909091	Dcxr	0.250217
Nme2	0.814133	0.000347266	1	0.611336	0.729282	4932438A13Rik	2.87707	0.00166593	1	0.35	0.128571	Wdr6	2.1814	1.52498e-05	0.0786431	0.192698	0.0929705	Id2	3.84946	0.000343433	1	0.340426	0.108108	Rpl41	1.16844	1.55494e-08	0.000113666	0.931298	0.880342	Ctsc	0.692464	1.8779e-06	0.0114195	0.582524	0.690667	Hmha1	1.66983	0.00172843	1	0.571429	0.37013	Jun	0.584101	0.00410036	1	0.431818	0.618182	Clptm1	0.0794415
mt-Co2	1.03363	0.000352867	1	1	0.998895	Atp5b	0.929185	0.00169014	1	1	0.985714	Slc17a3	0.256577	1.56088e-05	0.0804788	0.0344828	0.104308	Notch4	4.81687	0.000350965	1	0.234043	0.045045	Tmem178	2.19953	1.93975e-08	0.000141776	0.414758	0.196581	Tmbim6	0.812634	1.88365e-06	0.0114526	0.752427	0.824	Hpgd	1.70677	0.00178175	1	0.532468	0.324675	Alox5ap	0.886659	0.00410938	1	0.954545	0.981818	Adprh	0.183671
Kdelr1	0.654887	0.000358678	1	0.218623	0.345856	Ubac2	3.58678	0.00175475	1	0.2875	0.0857143	Cycs	0.939225	1.7403e-05	0.0897125	0.912779	0.911565	Lfng	6.31215	0.000358685	1	0.212766	0.036036	Tmem86a	0.426513	2.00783e-08	0.000146732	0.251908	0.435897	Manf	0.590073	1.89727e-06	0.0115335	0.359223	0.554667	Gmfb	2.75898	0.00181048	1	0.246753	0.0974026	Rabac1	1.65074	0.00416576	1	0.681818	0.436364	Tuba1c	0.545664
Ddit4	2.88086	0.000366555	1	0.109312	0.0497238	Sqle	8.37687	0.00178186	1	0.2125	0.0428571	Cdc42bpb	2.03022	1.74901e-05	0.0901438	0.231237	0.126984	Snrk	3.27598	0.000361102	1	0.404255	0.171171	Serpinb1a	2.33364	2.22258e-08	0.000162404	0.399491	0.188034	Ccr5	0.281836	1.93791e-06	0.0117786	0.0631068	0.218667	Sla	1.78511	0.00181184	1	0.454545	0.25974	Acss2	3.98096	0.00437859	1	0.227273	0.0727273	Rpl38	1.10692
Hsph1	0.368023	0.000374415	1	0.0404858	0.119337	Gsk3a	2.86822	0.00178292	1	0.35	0.128571	Slc25a39	0.811163	1.81189e-05	0.0933666	0.665314	0.746032	Ramp2	3.01373	0.000366412	1	0.425532	0.171171	Srsf2	1.79509	2.26309e-08	0.000165341	0.564885	0.34188	H2-M3	0.392308	1.96177e-06	0.0119217	0.116505	0.296	Stk25	2.77432	0.0018171	1	0.220779	0.0779221	Rbm3	1.59187	0.00438729	1	0.613636	0.436364	Zfp141	7.29144
Tubb4b	0.739756	0.000413015	1	0.425101	0.550276	Rgs2	2.00924	0.00183204	1	0.5375	0.271429	Ube2h	1.98539	2.06779e-05	0.106533	0.219067	0.113379	H2-T23	0.753564	0.000368397	1	0.787234	0.882883	Ly6c1	1.51355	2.41911e-08	0.000176716	0.743003	0.495726	Aig1	0.377392	1.9714e-06	0.0119782	0.11165	0.282667	Zc3h15	2.27479	0.00186741	1	0.272727	0.11039	Nfkbiz	0.63242	0.00440149	1	0.5	0.754545	Pth1r	4.7246
Creld2	0.37246	0.000429849	1	0.0404858	0.118232	Tpi1	0.834389	0.00190352	1	0.9125	0.928571	Eno1	0.875722	2.11523e-05	0.108956	0.833671	0.895692	H2-Q4	0.655948	0.000380212	1	0.617021	0.864865	Pth1r	1.54291	2.50317e-08	0.000182831	0.707379	0.517094	Gm42418	1.08948	2.14997e-06	0.013061	1	1	Bcl10	1.90041	0.00187804	1	0.441558	0.253247	Ube2k	5.71035	0.00461542	1	0.181818	0.0454545	M6pr	0.512994
Stub1	0.679867	0.000477382	1	0.271255	0.403315	Rps9	0.851276	0.00192084	1	0.8875	0.9	Dusp15	0.349619	2.15488e-05	0.110976	0.0547667	0.133787	B2m	0.818574	0.000430626	1	0.893617	0.954955	Ccng1	1.83618	2.79337e-08	0.000204	0.544529	0.333333	Acvrl1	0.279797	2.69592e-06	0.016375	0.0631068	0.213333	Fhl3	4.21559	0.00188085	1	0.12987	0.025974	Ogdh	3.35739	0.00501849	1	0.25	0.0909091	Arpc1b	0.850988
Mlf2	0.654785	0.000490915	1	0.210526	0.341436	Sf3a1	0.360157	0.00197263	1	0.15	0.357143	Trpm6	1.44394	2.16007e-05	0.111222	0.464503	0.321995	Cox6a2	0.559355	0.000443295	1	0.510638	0.72973	Myo19	1.92404	2.94052e-08	0.000214717	0.465649	0.235043	Oasl2	0.452381	3.18509e-06	0.019343	0.0776699	0.245333	Fos	1.43005	0.00192056	1	0.688312	0.493506	Rpl27a	1.55117	0.00512236	1	0.636364	0.454545	Jun	0.298279
Dusp2	0.822687	0.000522983	1	0.651822	0.743646	Cspp1	3.45065	0.00211267	1	0.3125	0.114286	Vdac2	0.788353	2.19307e-05	0.112899	0.602434	0.680272	Dusp6	4.2109	0.000456445	1	0.297872	0.0900901	Fkbp5	2.8975	3.28613e-08	0.00023992	0.302799	0.111111	Lrrc25	0.591984	3.41677e-06	0.0207466	0.325243	0.536	Xbp1	1.62996	0.00194557	1	0.571429	0.357143	Sec13	6.86315	0.00541327	1	0.159091	0.0363636	Nkg7	0.908799
Akr1a1	1.25884	0.000601351	1	0.558704	0.420994	Rassf7	0.326111	0.00214095	1	0.1625	0.371429	Rpl38	1.1126	2.22117e-05	0.114324	0.8357	0.814059	Ica1	5.42817	0.000460686	1	0.191489	0.027027	Zfyve9	2.60244	3.62719e-08	0.000264785	0.318066	0.119658	Cndp2	0.513668	3.63521e-06	0.0220694	0.281553	0.48	Gm10260	1.53782	0.00194632	1	0.675325	0.474026	Rpl9	1.93033	0.00542772	1	0.477273	0.272727	Ypel3	1.90707
P4hb	0.66717	0.000658386	1	0.242915	0.364641	Il10rb	0.123214	0.00218248	1	0.025	0.171429	Ltbp3	1.63232	2.31091e-05	0.118919	0.257606	0.138322	Cd68	0.572473	0.000473174	1	0.510638	0.720721	Ccs	1.5737	3.8013e-08	0.000277457	0.679389	0.452991	Fcgr2b	0.60045	3.7601e-06	0.0228238	0.359223	0.56	Tusc2	0.0776781	0.00196243	1	0.025974	0.162338	Dgat1	0.395718	0.00566359	1	0.181818	0.418182	Rps29	1.08207
Ubb	0.957975	0.000771257	1	0.967611	0.972376	Dmwd	3.84167	0.00220485	1	0.2625	0.0714286	Asb11	2.98126	2.35001e-05	0.120908	0.131846	0.0521542	Tm4sf1	2.8989	0.000493003	1	0.404255	0.153153	Mtch1	1.80275	3.93052e-08	0.000286849	0.513995	0.273504	Txndc12	0.458936	3.77101e-06	0.0228863	0.131068	0.309333	Mgea5	4.51479	0.00199359	1	0.181818	0.0584416	Grina	0.841564	0.00577774	1	0.886364	0.945455	Cma1	0.00031719
Ddx5	0.915656	0.000816468	1	0.910931	0.956906	Bcl7c	3.554	0.00220485	1	0.2625	0.0714286	Ndufa1	1.08309	2.44762e-05	0.125906	0.88641	0.861678	Ptpn14	1118.2	0.000512504	1	0.106383	0	Gm3839	1.51679	4.08926e-08	0.000298393	0.709924	0.555556	Runx3	0.498242	3.77889e-06	0.0229303	0.165049	0.362667	Plxdc2	1.78185	0.00200006	1	0.506494	0.311688	Atp6v0a1	0.130807	0.00594186	1	0.0227273	0.2	Spp2	5.90903
Rpl39	1.0298	0.000816691	1	0.959514	0.967956	Col27a1	7.31771	0.00224287	1	0.1875	0.0285714	Atp6v1f	0.869528	2.56253e-05	0.131791	0.789047	0.863946	S100g	1878.03	0.000512504	1	0.106383	0	Cd63	0.858483	4.17758e-08	0.000304796	0.895674	0.858974	Akr1c21	2.16212	4.66536e-06	0.0283047	0.31068	0.149333	Fbp1	1.88541	0.00213594	1	0.363636	0.168831	Ergic2	0.00042024	0.00603587	1	0	0.154545	Kbtbd3	5.61236
Sub1	0.864526	0.000818716	1	0.753036	0.841989	Rhbg	1.63522	0.00226069	1	0.675	0.457143	Idh3b	0.823454	2.56412e-05	0.131847	0.653144	0.69161	Dchs1	1291.96	0.000512504	1	0.106383	0	Trim16	10.017	4.20216e-08	0.000306547	0.155216	0.017094	Ms4a6c	0.765123	5.49808e-06	0.0333514	0.669903	0.778667	Glipr1	1.58896	0.00222703	1	0.597403	0.428571	Vta1	0.000452064	0.00603587	1	0	0.154545	Dhrs3	3.02
2210016F16Rik	0.395336	0.000869602	1	0.0526316	0.128177	Exd2	1043.27	0.00232767	1	0.125	0	Hsp90aa1	0.820949	2.57912e-05	0.132593	0.675456	0.707483	Sdpr	4.10906	0.000523782	1	0.276596	0.0720721	Ahcyl2	1.83875	4.21098e-08	0.000307149	0.534351	0.307692	Clec4n	0.209941	6.42766e-06	0.0389837	0.0291262	0.152	Stk17b	1.64027	0.00223392	1	0.558442	0.38961	Shisa5	0.403236	0.00617223	1	0.181818	0.418182	Txnip	1.48148
Ly6a	0.681584	0.000912166	1	0.287449	0.39779	Cenpb	2.09755	0.00234585	1	0.5375	0.314286	Dnaja4	2.42211	2.70754e-05	0.139167	0.15213	0.0657596	Sp140	0.56416	0.000550441	1	0.446809	0.738739	C130074G19Rik	1.94763	5.3262e-08	0.00038844	0.473282	0.252137	Hspa5	0.748446	7.00573e-06	0.0424828	0.660194	0.768	Dram2	1.80882	0.00228819	1	0.441558	0.272727	Pck1	2.99114	0.00630233	1	0.272727	0.1	Rufy3	4.83942
Tuba1b	0.741974	0.000956064	1	0.352227	0.481768	1500026H17Rik	4.86847	0.00238709	1	0.2375	0.0571429	Gpx6	1.31314	2.94689e-05	0.151441	0.602434	0.478458	Napsa	0.598952	0.000574279	1	0.510638	0.747748	Tmem151a	2.64082	5.42531e-08	0.000395613	0.323155	0.132479	Med21	0.615516	7.0835e-06	0.0429473	0.247573	0.464	Rps29	1.1099	0.00234191	1	0.987013	0.954545	Ifitm6	0.456928	0.00655362	1	0.204545	0.463636	Naa30	4.3673
Pag1	1.65221	0.000984122	1	0.251012	0.161326	Anxa5	0.756383	0.00242345	1	0.8	0.785714	Myl6	0.890745	3.14367e-05	0.161522	0.79716	0.825397	Ly6d	0.516368	0.000624293	1	0.404255	0.675676	Baiap2	2.02204	7.08796e-08	0.000516783	0.447837	0.24359	Oas1g	0.077069	7.20511e-06	0.0436774	0.00485437	0.104	Fuca2	2.30567	0.00243324	1	0.220779	0.0779221	Cd52	0.905982	0.00665484	1	1	0.990909	Zfp518a	4.3643
Dynll1	0.762007	0.0010123	1	0.408907	0.537017	Cacybp	0.557427	0.00243894	1	0.325	0.571429	Hspd1	0.711291	3.96764e-05	0.203818	0.419878	0.507937	H2-Q7	0.397463	0.000624536	1	0.234043	0.531532	Car12	2.00059	7.11901e-08	0.000518976	0.43257	0.209402	Gtpbp4	0.430425	8.05074e-06	0.0487956	0.092233	0.253333	Cebpa	2.83129	0.00249631	1	0.233766	0.0909091	Zfp740	5.26261	0.00673456	1	0.159091	0.0363636	Rps4x	1.10281
Spink1	1.41782	0.00116132	1	0.259109	0.159116	Nr1d2	2.67437	0.00244147	1	0.2875	0.0857143	Nudt19	0.631846	4.0639e-05	0.208722	0.361055	0.446712	Rnf6	0.384631	0.000645894	1	0.106383	0.405405	Slc25a25	3.53502	7.19086e-08	0.000524142	0.254453	0.0811966	Ly6a	0.178313	8.39681e-06	0.0508847	0.038835	0.162667	Ifi203	0.308666	0.00261935	1	0.0519481	0.207792	Relt	3.09041	0.00679379	1	0.295455	0.127273	Rps21	1.09927
Dnaja3	0.418546	0.00116431	1	0.0607287	0.137017	Hnrnpul2	2.18447	0.0025981	1	0.4875	0.228571	Atp6v0c	0.772048	4.22682e-05	0.217047	0.549696	0.628118	Aldob	2.14912	0.000654222	1	0.510638	0.243243	Mif	1.19898	7.20037e-08	0.000524763	0.933842	0.858974	Msmo1	0.421341	8.47725e-06	0.0513636	0.121359	0.285333	Tmx2	0.235412	0.00272282	1	0.0649351	0.220779	Ndel1	1.53963	0.00685758	1	0.636364	0.481818	Erlec1	3.80269
Cdk5rap1	0.41213	0.00118048	1	0.0566802	0.130387	Wdr74	0.267804	0.00271461	1	0.0875	0.271429	Lars2	1.21993	4.42489e-05	0.227174	0.770791	0.675737	Ptpn6	0.611092	0.000662152	1	0.510638	0.747748	Ddit4	2.62637	7.32223e-08	0.000533571	0.379135	0.188034	Hspa8	0.90411	8.51812e-06	0.0516028	0.898058	0.906667	Sh3gl1	2.26125	0.00279866	1	0.285714	0.12987	Itga4	2.09184	0.0069584	1	0.386364	0.2	Kmt2b	3.39608
Pfdn1	0.579305	0.00119984	1	0.145749	0.240884	Vdac1	0.854636	0.00271555	1	0.8875	0.914286	Ndufa12	0.872649	4.89118e-05	0.251064	0.774848	0.839002	Epas1	3.36298	0.000721563	1	0.319149	0.0990991	mt-Nd4l	0.922446	8.54919e-08	0.000622894	1	1	C1qb	0.148045	8.73766e-06	0.052924	0.0194175	0.130667	Tbc1d23	3.74949	0.00296415	1	0.168831	0.0519481	Jmjd1c	2.92236	0.00696376	1	0.25	0.0909091	Gm10076	1.06628
H2-T22	0.693446	0.00120312	1	0.275304	0.38895	Ufl1	3.70024	0.00273863	1	0.275	0.0857143	Ptgs1	1.75882	4.91336e-05	0.252154	0.229209	0.122449	Gng11	3.22081	0.000737419	1	0.361702	0.135135	S100g	2.86696	9.50165e-08	0.000692195	0.305344	0.119658	Sqle	0.145364	8.77981e-06	0.0531705	0.0194175	0.130667	Ucp2	1.17934	0.00301188	1	0.896104	0.844156	Cir1	0.208576	0.00699885	1	0.0454545	0.236364	Copb1	0.245063
Ptpn22	2.31572	0.00120315	1	0.109312	0.0530387	Cyp2j6	3.2447	0.00278065	1	0.325	0.128571	Cyb5a	0.825215	5.10278e-05	0.261824	0.681542	0.693878	Eng	2.4488	0.000796004	1	0.531915	0.288288	Mkln1	1.88863	1.11728e-07	0.000813825	0.440204	0.226496	Cd300lf	0.30258	9.06899e-06	0.0549127	0.0582524	0.194667	Tagap	2.04485	0.003093	1	0.376623	0.207792	Nxf1	0.200142	0.00708289	1	0.0227273	0.2	Sra1	0.459442
Ucp2	1.11824	0.00123385	1	0.821862	0.79116	Nudt19	0.558892	0.00282469	1	0.4375	0.628571	Scg5	1.63716	5.12318e-05	0.262819	0.312373	0.195011	Samhd1	0.541008	0.000799609	1	0.425532	0.684685	Cldn16	1.48421	1.17007e-07	0.000852161	0.740458	0.521368	Rngtt	0.25587	9.16194e-06	0.0554664	0.0242718	0.141333	Cmip	2.3996	0.00313924	1	0.25974	0.11039	Rps29	1.28779	0.00712066	1	0.795455	0.709091	Gp1bb	0.000379098
Rpl18a	0.967072	0.00123619	1	0.97166	0.98232	Slc25a5	0.895793	0.00283167	1	0.975	0.985714	Aldob	1.32392	5.14714e-05	0.263997	0.440162	0.285714	1810011O10Rik	2.91453	0.000837731	1	0.319149	0.0990991	Atp2b4	3.09562	1.18484e-07	0.0008628	0.26972	0.0940171	Tap1	0.547366	9.33542e-06	0.0565073	0.223301	0.416	Fus	1.55416	0.00323624	1	0.636364	0.428571	Rps3	1.47285	0.00723431	1	0.681818	0.509091	Uba52	1.06217
Eif4g2	0.799871	0.00129114	1	0.530364	0.660773	Cript	0.607711	0.00286376	1	0.4625	0.657143	Ucp2	1.36262	5.16111e-05	0.264662	0.553753	0.405896	Tram2	5.26734	0.00085115	1	0.212766	0.045045	Foxo3	1.86622	1.22405e-07	0.000891228	0.46056	0.247863	Gba	0.468867	1.00597e-05	0.0608813	0.140777	0.317333	Junb	1.40576	0.0033491	1	0.714286	0.506494	Tarm1	0.257043	0.00763495	1	0.0681818	0.263636	Emp3	0.708115
Rpl38	1.03134	0.00132318	1	0.959514	0.971271	Tmsb4x	0.586616	0.00287728	1	0.5375	0.7	Phyhip	1.77085	5.50327e-05	0.282153	0.241379	0.136054	Hn1	0.584859	0.000864338	1	0.510638	0.774775	Gsta3	2.31945	1.44073e-07	0.00104886	0.361323	0.166667	Tob1	0.440344	1.03583e-05	0.062678	0.121359	0.288	Pik3r1	2.21801	0.0034573	1	0.350649	0.188312	Rhoa	1.27616	0.00770549	1	0.840909	0.736364	Scimp	0.358205
Gucd1	0.593173	0.00132742	1	0.121457	0.216575	Slc25a3	0.887817	0.00290221	1	0.975	0.985714	mt-Atp6	1.04987	6.10286e-05	0.312833	0.979716	0.984127	Tinagl1	3.23004	0.000892641	1	0.319149	0.0990991	Socs3	0.23734	1.49159e-07	0.00108573	0.0661578	0.200855	Tmem185b	0.530078	1.08634e-05	0.0657236	0.140777	0.322667	Tmem9b	2.22369	0.00375798	1	0.285714	0.136364	Myadm	1.46381	0.00777811	1	0.704545	0.581818	Nxf1	1.79674
B2m	0.885511	0.00150756	1	0.813765	0.887293	Acat1	0.723936	0.00293055	1	0.725	0.842857	Bcat2	0.745227	6.12625e-05	0.31397	0.490872	0.569161	H2-T22	0.535691	0.000901538	1	0.404255	0.693694	Aff1	2.0812	1.84919e-07	0.00134584	0.356234	0.15812	mt-Co1	1.06676	1.08697e-05	0.0657509	1	1	Ifngr1	1.53556	0.00380469	1	0.623377	0.467532	Ly6c2	0.128157	0.00792243	1	0.0227273	0.190909	Pfkp	0.374505
Ppp4c	0.746139	0.00157257	1	0.311741	0.438674	Eef1b2	0.735989	0.00295847	1	0.7125	0.8	Sgpl1	1.84109	6.31064e-05	0.323357	0.225152	0.124717	Myo1d	14.7699	0.000942654	1	0.12766	0.00900901	Shd	1.51776	1.8605e-07	0.00135389	0.692112	0.431624	S100a4	1.34917	1.15099e-05	0.0696116	0.68932	0.597333	Clec10a	1.8554	0.003808	1	0.220779	0.0779221	Gm20406	0.000411807	0.0079382	1	0	0.145455	Rplp2	1.11552
Chd1	0.670651	0.00173526	1	0.186235	0.297238	Rplp0	0.852295	0.00297231	1	0.925	0.971429	Cndp2	0.397366	6.43826e-05	0.329832	0.166329	0.253968	Entpd1	3.85539	0.000949818	1	0.276596	0.0810811	Rpl35a	1.23471	2.18501e-07	0.00158981	0.936387	0.811966	Tkt	0.795948	1.19296e-05	0.0721381	0.708738	0.8	Ddx20	6.3196	0.00396548	1	0.103896	0.0194805	Litaf	0.826994	0.00797787	1	0.818182	0.881818	Dnajb1	0.394242
5031414D18Rik	1.47341	0.00181836	1	0.287449	0.201105	Smim22	0.359179	0.00311032	1	0.2625	0.428571	Ssbp4	1.73635	6.7108e-05	0.343727	0.288032	0.181406	Igsf8	0.45625	0.000962745	1	0.276596	0.567568	Atp6v1b1	1.43006	2.22123e-07	0.00161594	0.755725	0.564103	Tgm2	0.48385	1.24575e-05	0.0753182	0.174757	0.349333	Gigyf1	5.47703	0.0039756	1	0.12987	0.0324675	Aco2	2.86969	0.00801198	1	0.272727	0.109091	Cnn2	0.782296
Swap70	0.763958	0.00182243	1	0.396761	0.535912	Mtrf1l	0.143455	0.00314797	1	0.0375	0.185714	Lap3	0.588694	7.29038e-05	0.37334	0.188641	0.290249	H2afj	0.680057	0.000968866	1	0.659574	0.873874	Irx1	2.70366	2.42254e-07	0.00176216	0.318066	0.141026	Ms4a7	0.173903	1.24803e-05	0.0754435	0.0194175	0.128	St3gal6	1.46506	0.00397997	1	0.675325	0.480519	Golga2	3.87824	0.00812121	1	0.159091	0.0363636	Chmp2a	0.455686
Gnpnat1	0.436936	0.00195165	1	0.0445344	0.111602	Kdf1	0.458497	0.0032165	1	0.275	0.471429	Acat1	0.870602	8.06905e-05	0.413135	0.74645	0.764172	Cd93	2.74069	0.000971051	1	0.319149	0.0990991	Ddx5	1.33666	2.59148e-07	0.00188478	0.832061	0.662393	Mapk6	0.416828	1.25355e-05	0.0757646	0.0776699	0.226667	Trf	1.56648	0.00403825	1	0.545455	0.357143	Ndrg1	2.23529	0.00817259	1	0.363636	0.181818	Cnot1	2.36979
Smc1a	0.60609	0.00196547	1	0.1417	0.236464	Kat2b	3.01672	0.00322536	1	0.25	0.0714286	Unc5b	2.21006	8.34235e-05	0.427045	0.139959	0.0612245	Zfp69	7.71344	0.00097949	1	0.191489	0.036036	Litaf	0.49382	2.70025e-07	0.00196362	0.24173	0.41453	Ifitm2	0.878615	1.30677e-05	0.078968	0.834951	0.869333	Ldb1	4.33346	0.00416454	1	0.12987	0.0324675	Ccdc12	0.466912	0.00823698	1	0.227273	0.472727	Ap2m1	0.577081
Actb	0.965124	0.00200139	1	0.979757	0.98674	Cox7a2	0.939883	0.00324005	1	1	0.985714	Mdh1	0.924621	8.43888e-05	0.431902	0.904665	0.902494	Hs3st1	0.544451	0.000989844	1	0.382979	0.693694	Kctd12	2.65857	2.84559e-07	0.00206903	0.310433	0.132479	Stat1	0.518867	1.41492e-05	0.0854897	0.208738	0.389333	Armc1	0.137556	0.00417514	1	0.038961	0.168831	Map3k3	2.4523	0.00828073	1	0.295455	0.136364	Taf2	6.88757
Akap10	2.15692	0.00205139	1	0.121457	0.0651934	Kif1c	2.57578	0.00330248	1	0.3875	0.171429	Mrpl15	0.682948	9.09691e-05	0.465489	0.332657	0.428571	Trip10	8.69753	0.000990914	1	0.170213	0.027027	Bag1	1.38811	2.92175e-07	0.00212411	0.768448	0.615385	Cysltr1	0.200804	1.50245e-05	0.0907629	0.0339806	0.152	F630028O10Rik	4.47673	0.00436159	1	0.12987	0.0324675	Ctsh	0.138804	0.00839788	1	0.0227273	0.190909	Eif4a2	1.52008
Dpm1	2.13793	0.00208939	1	0.11336	0.0585635	Flrt1	4.44913	0.00330772	1	0.275	0.1	1700028J19Rik	0.529841	9.97873e-05	0.510512	0.1643	0.256236	Cdc42ep4	4.9971	0.000999284	1	0.212766	0.045045	Zc3h15	1.82251	2.96725e-07	0.0021569	0.498728	0.290598	Nrros	0.785341	1.53169e-05	0.0925141	0.699029	0.832	Oraov1	4.68151	0.00448109	1	0.116883	0.025974	Taok3	3.53999	0.00877512	1	0.204545	0.0636364	Rac2	0.907769
Serf2	0.917736	0.00209599	1	0.862348	0.898343	AU040320	2.86777	0.00331254	1	0.3375	0.128571	Eif4ebp3	0.531197	9.98516e-05	0.510741	0.141988	0.23356	Pdia6	0.624475	0.00100651	1	0.595745	0.792793	Jund	1.61199	3.12963e-07	0.00227461	0.633588	0.431624	Bnip3l	1.36619	1.55929e-05	0.0941658	0.694175	0.602667	Serpinb8	0.0569873	0.00449631	1	0.012987	0.123377	Stk17b	1.17612	0.00886003	1	0.931818	0.872727	Dopey2	5.78537
Stip1	0.538324	0.00211897	1	0.105263	0.190055	Sgms2	3.35315	0.00335125	1	0.2875	0.1	Nampt	1.44549	0.000100515	0.514034	0.427992	0.30839	Cdc42bpa	6.61621	0.00100769	1	0.191489	0.036036	Herpud1	1.55377	3.16638e-07	0.00230101	0.679389	0.5	Rpl37a	1.04781	1.68946e-05	0.102009	0.907767	0.906667	Apbb1ip	1.49071	0.00450822	1	0.623377	0.409091	Upp1	0.0996953	0.00901688	1	0.0227273	0.181818	Anxa6	0.68453
Mrps7	0.597154	0.00214313	1	0.133603	0.225414	Atp2a2	2.19972	0.00339505	1	0.4625	0.242857	Cwh43	1.33958	0.000100718	0.514969	0.494929	0.358277	Kif1c	13.4545	0.001017	1	0.148936	0.018018	Top3b	1.92516	3.54135e-07	0.00257314	0.458015	0.252137	Psmb8	0.778397	1.70147e-05	0.102718	0.660194	0.730667	Notch2	4.75255	0.00456705	1	0.12987	0.0324675	Fis1	0.579154	0.00905996	1	0.386364	0.618182	Rer1	0.565502
Ccnd1	2.22535	0.00227906	1	0.101215	0.0497238	Gpi1	0.790133	0.00340031	1	0.8125	0.842857	Natd1	2.51936	0.000117362	0.599957	0.105477	0.0385488	Ldb2	3.73636	0.00101746	1	0.255319	0.0630631	Fam46b	5.32164	3.57276e-07	0.00259561	0.198473	0.0555556	Irf1	0.540333	1.78964e-05	0.108022	0.247573	0.432	Snapc1	3.66432	0.00470658	1	0.116883	0.025974	Jdp2	3.60698	0.00975811	1	0.159091	0.0363636	Calm1	0.823589
Hspa8	0.886666	0.00246753	1	0.817814	0.898343	Raf1	2.06122	0.00356774	1	0.425	0.2	Stard5	0.389083	0.000122003	0.623556	0.0709939	0.145125	Smad6	5.63567	0.00103664	1	0.191489	0.036036	Nrbp2	1.87258	3.76098e-07	0.00273198	0.419847	0.209402	Pilra	0.595802	1.79867e-05	0.10855	0.26699	0.464	Zfp580	4.63614	0.004784	1	0.116883	0.025974	Gm15441	7.15606	0.00998324	1	0.113636	0.0181818	Rps24	1.0696
Ly6d	0.891659	0.00252491	1	0.838057	0.889503	Nucks1	1.9295	0.00359168	1	0.4625	0.242857	Etfdh	0.654701	0.000126715	0.647515	0.233266	0.340136	Tmem98	9.79443	0.00105624	1	0.12766	0.00900901	1700037H04Rik	2.35773	3.87246e-07	0.00281257	0.340967	0.162393	Hsp90ab1	0.855656	1.8303e-05	0.11044	0.849515	0.898667	Dusp6	1.87741	0.00487094	1	0.376623	0.214286	Grk5	6.10108	0.00998324	1	0.113636	0.0181818	Sdf4	0.542766
Pkig	1.25686	0.0025578	1	0.526316	0.456354	Nab2	8.79941	0.00364672	1	0.175	0.0285714	Txn2	0.813108	0.000129412	0.661168	0.606491	0.668934	Prickle3	4.7002	0.00108199	1	0.212766	0.045045	1500026H17Rik	1.95418	4.00489e-07	0.00290835	0.394402	0.188034	Pydc4	0.182486	2.03476e-05	0.122757	0.0242718	0.133333	Ola1	2.25314	0.00489374	1	0.246753	0.103896	Zyx	1.18236	0.0101679	1	0.909091	0.863636	Tmem216	5.68908
Fos	0.880803	0.00258565	1	0.793522	0.870718	Atp6v1e1	0.86492	0.00374236	1	0.9375	0.942857	Ppif	0.60943	0.000133702	0.682952	0.204868	0.303855	F2r	2.90971	0.00111915	1	0.255319	0.0630631	Sardh	1.88393	4.65873e-07	0.0033827	0.447837	0.247863	Ifi203	0.425435	2.08215e-05	0.125595	0.135922	0.293333	Malt1	5.17391	0.00499562	1	0.103896	0.0194805	Tnfaip2	1.27872	0.0102581	1	0.818182	0.727273	Klrg1	0.480165
Gngt2	0.58707	0.00259594	1	0.117409	0.20442	Atp5h	0.916882	0.00374606	1	0.9875	1	Mprip	1.5247	0.000140764	0.718883	0.336714	0.219955	Parvb	10.3525	0.00112448	1	0.148936	0.018018	Mocs2	1.74256	4.73729e-07	0.00343927	0.503817	0.282051	Irf7	0.687012	2.55421e-05	0.154045	0.475728	0.632	Id2	2.00787	0.00499613	1	0.363636	0.201299	Gltscr1l	8.83841	0.0103078	1	0.113636	0.0181818	Paip2	1.71862
Fgfr1op	1.55451	0.00282948	1	0.283401	0.212155	Eno1	0.842485	0.00382564	1	0.9125	0.914286	Idh3a	0.773389	0.000140944	0.719663	0.527383	0.578231	Qser1	7.25441	0.00115409	1	0.170213	0.027027	Slc35a3	3.38126	4.94536e-07	0.00358983	0.221374	0.0683761	Mppe1	0.346352	2.60545e-05	0.157109	0.0582524	0.192	Fbxo21	3.77257	0.00502322	1	0.116883	0.025974	Tmem27	2.16543	0.0104089	1	0.295455	0.127273	Csad	5.03179
Sptan1	0.614206	0.00283852	1	0.137652	0.225414	Garem	4.24154	0.00389473	1	0.225	0.0571429	Id2	0.648247	0.00014598	0.74523	0.263692	0.360544	H1f0	2.06105	0.00116228	1	0.531915	0.288288	Foxq1	2.0967	5.02841e-07	0.00364962	0.430025	0.25641	Lmo4	1.59116	2.79078e-05	0.168256	0.533981	0.394667	Apoe	1.33232	0.00508359	1	0.818182	0.655844	Gm2a	1.69497	0.0105685	1	0.545455	0.354545	Adck3	4.75357
Uba7	0.517243	0.00284626	1	0.0769231	0.153591	Klhl17	6.19086	0.0039003	1	0.175	0.0285714	Uqcrfs1	0.91752	0.000154272	0.787404	0.851927	0.85034	Plxna2	9.18958	0.00116258	1	0.148936	0.018018	Jade1	1.97767	5.61248e-07	0.00407297	0.412214	0.217949	Ergic2	0.542955	2.97772e-05	0.179497	0.150485	0.322667	Bcl2l11	2.8029	0.00512913	1	0.155844	0.0454545	Zcchc7	5.84814	0.0106418	1	0.113636	0.0181818	Mapre2	1.91628
Vps51	0.587589	0.00286047	1	0.11336	0.196685	Clec16a	5.494	0.00391727	1	0.2	0.0428571	Slc25a35	0.587295	0.000158949	0.811115	0.190669	0.287982	Gm5547	0.424536	0.00116553	1	0.255319	0.522523	Fam53b	2.28865	5.75824e-07	0.00417818	0.340967	0.162393	Klf2	1.24071	3.05818e-05	0.184316	0.781553	0.76	Filip1l	2.6296	0.00515078	1	0.246753	0.11039	Ddrgk1	4.51869	0.010855	1	0.204545	0.0727273	H2-T22	0.476976
Glo1	0.749291	0.00292947	1	0.319838	0.429834	Huwe1	1.94442	0.00392314	1	0.525	0.328571	Tns1	1.22966	0.000180102	0.91888	0.728195	0.609977	Rnase6	0.6059	0.00118921	1	0.489362	0.738739	Pank1	1.91844	5.79868e-07	0.00420694	0.43257	0.239316	Tmcc1	1.67612	3.07289e-05	0.185172	0.485437	0.349333	Abcb7	3.48482	0.005174	1	0.103896	0.0194805	AY036118	1.53331	0.0110692	1	0.636364	0.536364	Samsn1	0.29583
Orc2	0.417445	0.00305567	1	0.0404858	0.100552	Dock7	2.81234	0.00392323	1	0.325	0.128571	Chchd2	0.953727	0.000193503	0.987056	0.924949	0.918367	Sox7	7.14749	0.00118957	1	0.170213	0.027027	Csde1	1.54994	6.36996e-07	0.00462077	0.638677	0.435897	Mbp	1.54724	3.30934e-05	0.199387	0.558252	0.429333	Pou2f2	1.66559	0.00523115	1	0.493506	0.305195	Arhgap15	2.52102	0.0111072	1	0.295455	0.136364	Rpl3	1.16048
Psma1	0.687251	0.00309921	1	0.210526	0.316022	mt-Nd4	1.15884	0.00396558	1	0.9125	0.914286	Atp5k	1.09163	0.000199542	1	0.880325	0.861678	Nos3	10.0161	0.00120187	1	0.148936	0.018018	Tpmt	2.13823	6.40526e-07	0.00464573	0.371501	0.183761	Slfn1	0.456076	3.72763e-05	0.224553	0.15534	0.312	Mylip	2.19159	0.00531903	1	0.285714	0.136364	Comt	3.92689	0.0111389	1	0.181818	0.0545455	Raver1	0.163824
Zfp36	0.901888	0.00313876	1	0.862348	0.899448	Camk2a	925.162	0.00399747	1	0.1125	0	Arnt2	1.46056	0.000206109	1	0.336714	0.217687	Fkbp1a	1.59654	0.0012051	1	0.787234	0.693694	Hao2	1.55315	6.41441e-07	0.00465173	0.664122	0.495726	Fbp1	1.83106	3.79812e-05	0.228761	0.281553	0.136	Creb5	1.68004	0.00564604	1	0.467532	0.298701	Rnf138	0.055174	0.0112983	1	0.0227273	0.172727	Haghl	4.4535
H2-DMb2	1.06366	0.00314456	1	0.947368	0.935912	1500011B03Rik	1.91606	0.00399897	1	0.575	0.385714	Arhgef17	2.32893	0.000210274	1	0.115619	0.047619	Podxl	3.51953	0.00121442	1	0.276596	0.0810811	Ptp4a2	1.73225	6.52965e-07	0.00473465	0.491094	0.299145	Lilrb4a	0.711704	3.80639e-05	0.229221	0.504854	0.677333	Ifi35	0.347907	0.00568057	1	0.0909091	0.246753	Rnf103	5.31032	0.0113387	1	0.113636	0.0181818	mt-Nd1	1.1073
Stat1	0.616871	0.00317344	1	0.1417	0.232044	Kng2	2.19939	0.00407438	1	0.45	0.228571	Rtn4rl1	2.04913	0.000217933	1	0.150101	0.0725624	Tubgcp6	8.14433	0.00124238	1	0.148936	0.018018	Dnajb4	2.18835	6.89585e-07	0.00499949	0.356234	0.175214	Xaf1	0.434955	4.19891e-05	0.252816	0.126214	0.272	Nipbl	1.9747	0.0057157	1	0.324675	0.168831	Usp38	5.58858	0.0113387	1	0.113636	0.0181818	Zfp688	4.12301
Tuba1a	0.781446	0.00349913	1	0.425101	0.520442	Lrp6	2.24692	0.00410513	1	0.4125	0.2	Dpm1	2.21782	0.000224424	1	0.123732	0.0544218	Acer2	4.98097	0.00126184	1	0.191489	0.036036	C1qtnf4	1.55838	7.66746e-07	0.00555814	0.631043	0.42735	Sirpb1a	0.61311	4.41776e-05	0.265949	0.320388	0.498667	Fyb	1.46279	0.00591579	1	0.636364	0.454545	Map3k11	2.41803	0.0114016	1	0.295455	0.145455	Efr3a	0.429922
Cd74	1.01205	0.00373512	1	0.987854	0.99558	Kdm6b	2.2711	0.00420225	1	0.3875	0.171429	Ndufs7	0.880015	0.000227927	1	0.748479	0.770975	Alox5ap	0.647535	0.00127127	1	0.553191	0.765766	Ybx2	1.9452	7.78754e-07	0.00564441	0.430025	0.247863	Mrpl39	0.329389	4.60692e-05	0.277291	0.0485437	0.168	Slc25a25	2.47561	0.00617044	1	0.194805	0.0714286	Tnfrsf1b	2.01952	0.0115266	1	0.409091	0.218182	Gid8	0.0850318
Plaur	1.26188	0.00375821	1	0.489879	0.403315	Sp3os	2.14968	0.00422458	1	0.4375	0.2	Ptprf	1.36772	0.000229674	1	0.40568	0.274376	Plekhg1	5.81581	0.00128415	1	0.148936	0.018018	Gm15241	3.38921	7.88826e-07	0.00571662	0.188295	0.0470085	Rpl38	1.08567	4.64251e-05	0.279386	0.878641	0.869333	Mafg	0.0633723	0.00619196	1	0.012987	0.116883	Adgre5	1.20111	0.0115614	1	0.840909	0.809091	Itga2	0.086245
Guca2b	1.79736	0.00378265	1	0.145749	0.0850829	Gabarapl2	0.802752	0.004315	1	0.8625	0.9	Abhd14b	0.78547	0.000250185	1	0.525355	0.580499	Tmem229b	0.549197	0.00130174	1	0.425532	0.684685	Ftl1	1.07299	7.93664e-07	0.00575089	0.989822	0.974359	Oas3	0.328893	5.03262e-05	0.302812	0.0339806	0.144	Sp3	2.33204	0.00620855	1	0.25974	0.123377	Siglecf	5.28587	0.0117021	1	0.113636	0.0181818	Polm	3.64082
Sfxn3	0.516332	0.00382723	1	0.0728745	0.143646	Mrps6	0.752145	0.00432433	1	0.775	0.885714	Dbp	2.61023	0.000266802	1	0.115619	0.0498866	Cd300lg	3.29004	0.00132556	1	0.234043	0.0540541	Hotairm1	1.86538	8.54782e-07	0.0061929	0.419847	0.226496	St3gal5	3.17347	5.44417e-05	0.327521	0.169903	0.0666667	Csf3r	3.20185	0.00625669	1	0.155844	0.0519481	Fth1	1.0913	0.0119484	1	1	0.990909	Narfl	3.93757
Irf4	0.689707	0.00404498	1	0.206478	0.304972	Pde8a	2.91892	0.00433566	1	0.2875	0.1	Rab6b	2.22396	0.000268219	1	0.10142	0.0385488	Afap1l2	7.94721	0.00132722	1	0.148936	0.018018	Ybx1	1.23903	8.58818e-07	0.00622128	0.89313	0.777778	Scarb1	0.689514	5.45154e-05	0.32791	0.466019	0.621333	Kin	2.67791	0.00631102	1	0.181818	0.0649351	Lgals9	0.276866	0.0119485	1	0.0454545	0.227273	Sfxn1	1.86247
Fam43a	0.752198	0.00413923	1	0.34413	0.456354	Gpx3	1.38976	0.00448106	1	0.9	0.742857	Ly6e	0.731096	0.000273572	1	0.377282	0.473923	Tmem176b	2.2656	0.00133326	1	0.489362	0.243243	Tanc1	1.68031	9.02103e-07	0.00653393	0.519084	0.316239	Sdf2l1	0.518487	5.52582e-05	0.332323	0.208738	0.368	Adamts10	3.60279	0.00650511	1	0.155844	0.0519481	Atp5g3	1.79678	0.0120226	1	0.454545	0.254545	Arhgap30	0.438163
Fosb	0.725008	0.004157	1	0.303644	0.398895	Epb41l4b	2.86458	0.00448508	1	0.2875	0.1	Abhd6	1.4492	0.000291095	1	0.403651	0.292517	Hvcn1	0.47714	0.00133605	1	0.319149	0.576577	Csrp1	2.24218	9.02775e-07	0.0065379	0.312977	0.132479	Pnp	0.683937	5.64013e-05	0.339141	0.466019	0.608	Tcirg1	1.53919	0.00660477	1	0.532468	0.357143	Limd2	1.49726	0.0122746	1	0.659091	0.5	Ralgapb	3.71722
Slc39a7	0.555233	0.00432248	1	0.0931174	0.167956	Tmem178	3.43854	0.00463353	1	0.225	0.0571429	Pgam1	0.849729	0.000302525	1	0.679513	0.709751	Gm10260	1.43102	0.00136437	1	0.744681	0.675676	Pck1	2.39413	9.12212e-07	0.00660533	0.290076	0.115385	1810043H04Rik	0.537073	5.67896e-05	0.341419	0.184466	0.349333	Tk2	3.24073	0.00675567	1	0.168831	0.0584416	Ankrd44	2.22981	0.0122767	1	0.340909	0.181818	Dao	3.88795
Aldh2	1.26722	0.00433091	1	0.481781	0.40663	Rc3h2	2.49379	0.00464832	1	0.3375	0.142857	Slc25a3	0.929285	0.00030485	1	0.916836	0.938776	Gm42418	1.10542	0.00138034	1	1	0.990991	Cpeb3	2.59548	9.20691e-07	0.0066658	0.262087	0.0982906	Lgals9	0.558614	5.76083e-05	0.346284	0.213592	0.378667	Ankrd44	2.36531	0.00677404	1	0.25974	0.123377	Rpl10-ps3	0.543191	0.0123327	1	0.272727	0.5	Slc22a18	3.80681
Cse1l	0.548039	0.00445599	1	0.0809717	0.153591	Clcc1	4.17228	0.00482587	1	0.25	0.0857143	Hipk2	1.49926	0.000312171	1	0.302231	0.195011	Rgs10	0.561075	0.00141164	1	0.446809	0.693694	4833439L19Rik	1.25044	1.00826e-06	0.00729882	0.882952	0.773504	Siglece	0.270756	5.84905e-05	0.351528	0.0533981	0.170667	Gm26532	1.65837	0.00679965	1	0.480519	0.305195	Guca2b	3.739	0.0124821	1	0.181818	0.0545455	Rpl32	1.06288
Acd	0.664319	0.00474067	1	0.165992	0.255249	Mrpl32	0.434742	0.0049547	1	0.3	0.471429	Bckdhb	0.693276	0.000315149	1	0.30426	0.401361	Arhgef15	4.54109	0.00142447	1	0.170213	0.027027	Cox11	1.68505	1.03954e-06	0.00752416	0.508906	0.311966	1110008F13Rik	0.642364	6.36389e-05	0.382406	0.320388	0.498667	Nfkbia	1.41031	0.00683781	1	0.688312	0.480519	Kctd20	0.380478	0.0127706	1	0.113636	0.318182	Psmd12	0.348538
mt-Atp6	1.05394	0.00478488	1	0.995951	0.98011	Prdx2	0.821065	0.00495756	1	0.8875	0.914286	Cyp51	0.461865	0.00031774	1	0.0831643	0.156463	Cd59a	3.95734	0.00145558	1	0.255319	0.0720721	Hras	2.06656	1.14374e-06	0.00827721	0.310433	0.132479	Hsd17b12	0.570911	6.48452e-05	0.38959	0.150485	0.32	Arid1a	2.30583	0.00683965	1	0.25974	0.123377	Sphk2	0.197633	0.0130536	1	0.0454545	0.209091	Ccl4	0.6016
Calm1	0.893377	0.00481168	1	0.777328	0.845304	Pole4	0.536212	0.00496479	1	0.35	0.528571	Kif1c	1.54591	0.000327829	1	0.231237	0.133787	Arhgef40	5.39812	0.00146453	1	0.148936	0.018018	Btg2	1.57646	1.20412e-06	0.00871304	0.592875	0.363248	Parp14	0.500337	6.70985e-05	0.403061	0.150485	0.309333	Rhoc	1.89853	0.00700829	1	0.311688	0.155844	1810058I24Rik	0.584305	0.0130676	1	0.340909	0.636364	Pfn1	0.940054
Pnrc1	0.843005	0.00484058	1	0.57085	0.649724							Mxi1	1.8113	0.000342352	1	0.158215	0.0793651	Fads1	4.17533	0.00148064	1	0.234043	0.0630631	Cystm1	1.1553	1.24167e-06	0.00898345	0.941476	0.880342	Mybbp1a	0.528902	6.84266e-05	0.41097	0.106796	0.256	Sh3pxd2b	2.63534	0.00707197	1	0.194805	0.0779221	Mark2	1.99196	0.0131108	1	0.409091	0.236364	Cxcr6	2.4367
Phf7	1.81426	0.00489723	1	0.137652	0.079558							Actb	0.887029	0.000344322	1	0.799189	0.848073	Slc15a3	0.000564128	0.00148197	1	0	0.189189	Txnip	1.33482	1.24234e-06	0.00898711	0.842239	0.679487	H2-DMa	0.661476	6.85294e-05	0.411519	0.402913	0.562667	Fam46a	2.31483	0.00719253	1	0.272727	0.136364	Dock11	0.25328	0.0131669	1	0.0454545	0.218182	Jtb	1.99075
Pnp	0.635192	0.0049168	1	0.153846	0.243094							Copa	1.31616	0.000354878	1	0.555781	0.437642	RP23-144N15.7	0.000616285	0.00148197	1	0	0.189189	Epb41l4b	2.53634	1.41245e-06	0.0102162	0.26972	0.106838	Naa20	0.510677	7.0224e-05	0.421625	0.116505	0.269333	Pid1	1.59975	0.0072341	1	0.454545	0.285714	Klhdc4	0.000489397	0.0136581	1	0	0.127273	Tmem18	3.333
Tufm	0.641752	0.00494508	1	0.1417	0.228729							Ggct	0.402238	0.000357125	1	0.0649087	0.131519	Emp3	0.752067	0.00156222	1	0.744681	0.846847	Ncoa7	1.69221	1.44203e-06	0.0104288	0.480916	0.286325	AI607873	0.639705	7.06795e-05	0.424289	0.305825	0.490667	Cd33	1.81506	0.00736145	1	0.402597	0.24026	Anxa7	0.000561506	0.0136581	1	0	0.127273	Lonp2	0.260793
Pdia4	0.672461	0.00503504	1	0.186235	0.280663							Glo1	0.826606	0.000359896	1	0.612576	0.655329	Lpcat1	4.34982	0.00157408	1	0.191489	0.036036	Susd4	2.62631	1.524e-06	0.0110201	0.274809	0.115385	Txn2	0.647497	7.17154e-05	0.430436	0.373786	0.546667	Tmem41b	2.754	0.00756312	1	0.194805	0.0779221	Pdzk1ip1	2.31408	0.0137429	1	0.25	0.0909091	Limk2	0.000487186
Tmem214	0.489808	0.00510732	1	0.0647773	0.129282							Mrpl42	0.858491	0.000364582	1	0.691684	0.734694	Grm8	0.30229	0.00158399	1	0.0851064	0.351351	Slc25a16	2.05543	1.55894e-06	0.0112711	0.340967	0.166667	Per1	1.76182	7.6689e-05	0.460211	0.456311	0.328	Nfam1	1.75973	0.0075895	1	0.363636	0.194805	Rpl36	1.74869	0.0138315	1	0.477273	0.290909	Rpsa	1.09622
Pitpnc1	0.478672	0.00512451	1	0.0607287	0.123757							Mpv17l	0.477229	0.000376165	1	0.10142	0.176871	Ets2	2.69204	0.00158891	1	0.297872	0.0900901	Slc1a5	1.51902	1.73103e-06	0.0125136	0.628499	0.452991	Adrbk1	1.40934	7.99935e-05	0.479961	0.631068	0.541333	Zcchc17	3.22618	0.00758993	1	0.155844	0.0519481	Steap4	0.25727	0.0138614	1	0.0454545	0.218182	Dcaf7	2.13869
Irf7	0.578032	0.00515696	1	0.101215	0.176796							Uqcrc1	0.909076	0.000382745	1	0.799189	0.798186	Ftl1	0.915017	0.00159455	1	1	0.972973	Gtf3c1	1.74156	1.79894e-06	0.0130027	0.424936	0.230769	Pdia6	0.641316	8.35052e-05	0.500948	0.407767	0.549333	Cytip	1.57906	0.00764823	1	0.519481	0.331169	mt-Atp8	1.15956	0.0139825	1	0.977273	0.963636	Ubn1	2.17737
Hnrnpr	0.648364	0.00520956	1	0.153846	0.236464							Fbrs	2.0707	0.000394653	1	0.111562	0.047619	Blnk	0.559784	0.0015986	1	0.404255	0.657658	Myo1c	1.6519	2.01433e-06	0.0145575	0.534351	0.337607	Hprt	0.624815	8.37983e-05	0.502622	0.334951	0.498667	Ier2	1.38432	0.0076505	1	0.714286	0.487013	Cd24a	0.664905	0.0139931	1	0.477273	0.663636	Tmem30a	0.573982
Uba52	1.01101	0.00525501	1	0.963563	0.981215							Sdhb	0.914827	0.000401967	1	0.849899	0.868481	Clec12a	0.610012	0.00162003	1	0.510638	0.72973	Ahcyl1	1.67592	2.27872e-06	0.016466	0.503817	0.311966	Mndal	0.561562	8.40454e-05	0.50402	0.213592	0.378667	Mt1	1.47363	0.00778722	1	0.61039	0.415584	Ndufs3	4.60514	0.0141909	1	0.159091	0.0454545	Rpl17	1.13623
Jun	0.818494	0.00536415	1	0.562753	0.666298							Ldb1	1.60019	0.00044228	1	0.192698	0.106576	Gimap1	1.95801	0.00166554	1	0.489362	0.243243	Myo6	1.54014	2.31392e-06	0.016718	0.587786	0.388889	Eif3g	0.592052	8.42172e-05	0.504966	0.213592	0.384	Tmem19	2.34391	0.00782306	1	0.207792	0.0844156	Prr5l	0.374627	0.0143412	1	0.113636	0.318182	Ywhaz	0.917507
Cyp4b1	0.380071	0.00545489	1	0.0769231	0.138122							Glrx	0.649267	0.000450693	1	0.273834	0.356009	Dnajb1	0.361806	0.00167967	1	0.212766	0.468468	Birc2	2.40896	2.34745e-06	0.016958	0.259542	0.102564	Hsp90aa1	0.706783	8.49445e-05	0.509242	0.519417	0.693333	Cnot6l	2.88333	0.00782699	1	0.168831	0.0584416	Pdcd10	0.354513	0.0144447	1	0.113636	0.318182	Snapc5	0.22674
Ten1	0.475722	0.00557457	1	0.0526316	0.112707							Cbx7	1.83289	0.000467725	1	0.170385	0.0907029	Itga4	0.55529	0.00171942	1	0.425532	0.657658	Mecom	1.50187	2.36299e-06	0.0170679	0.638677	0.448718	Cd52	0.90058	8.76784e-05	0.525544	0.815534	0.84	Ahsa1	0.42032	0.00783191	1	0.142857	0.298701	Gm8797	0.574339	0.0144512	1	0.272727	0.545455	Xpo4	2.88836
Cenpa	0.58409	0.00558109	1	0.097166	0.171271							Atpif1	0.90459	0.000472447	1	0.801217	0.827664	Myl12a	1.23925	0.00173494	1	0.87234	0.900901	H3f3b	1.18516	2.51115e-06	0.0181355	0.949109	0.858974	Psmb9	0.656401	9.1057e-05	0.545705	0.383495	0.541333	Cirbp	1.77114	0.00789763	1	0.415584	0.272727	Dnaja1	0.514579	0.014836	1	0.25	0.481818	Dnase1	2.65693
Hsp90aa1	0.779939	0.00566295	1	0.421053	0.527072							Ptgds	1.79508	0.000478472	1	0.208925	0.124717	AI662270	0.48709	0.00174434	1	0.319149	0.585586	Dlgap4	1.87937	2.58469e-06	0.018664	0.409669	0.222222	Armc3	4.90945	9.30862e-05	0.557772	0.101942	0.0266667	Nr3c1	1.92404	0.00794896	1	0.311688	0.168831	Tmed4	3.92616	0.0148842	1	0.159091	0.0454545	Actr3	0.779344
Gpat4	0.529234	0.0056652	1	0.048583	0.107182							Xrn2	1.83812	0.000478766	1	0.180527	0.0997732	Anxa3	2.74453	0.00177013	1	0.340426	0.126126	Slx4	6.80813	2.77976e-06	0.0200699	0.132316	0.0213675	Gpcpd1	1.3019	9.81027e-05	0.587733	0.76699	0.706667	Gpat4	3.34445	0.00796786	1	0.142857	0.0454545	mt-Co1	1.13596	0.0149464	1	1	0.990909	Snrpd1	0.493861
Txndc5	0.737691	0.00576699	1	0.299595	0.40221							Pamr1	1.8105	0.000501926	1	0.184584	0.104308	Jun	0.671278	0.00178263	1	0.702128	0.837838	Cnn3	1.41182	2.94274e-06	0.0212436	0.697201	0.478632	AW112010	0.36659	9.97194e-05	0.597319	0.106796	0.234667	Mgl2	1.65489	0.00807658	1	0.441558	0.25974	Nars	0.182675	0.0153598	1	0.0227273	0.172727	Stk4	0.375433
Inpp5d	1.25919	0.00600091	1	0.48583	0.409945							Paf1	1.8729	0.000548449	1	0.156187	0.0816327	Sh3glb1	1.39749	0.00181035	1	0.851064	0.720721	1700020I14Rik	1.52924	2.99819e-06	0.021641	0.577608	0.376068	Pdia4	0.423807	0.000101085	0.605397	0.116505	0.253333	Gemin7	0.319554	0.00811074	1	0.0909091	0.227273	Rac2	0.82061	0.0153799	1	0.795455	0.927273	Serpinb9b	0.000326799
Ddx39b	0.767329	0.00600187	1	0.331984	0.434254							Eif1	0.916527	0.000568064	1	0.84787	0.85941	Eef1b2	0.820697	0.00181953	1	0.829787	0.891892	Papss1	1.37391	3.15241e-06	0.022751	0.727735	0.559829	Prep	0.338494	0.000103684	0.62086	0.0631068	0.184	Sirpa	1.50721	0.00812171	1	0.571429	0.396104	Cd300a	1.4404	0.015442	1	0.590909	0.481818	Ndfip1	0.706489
Akr1c21	1.40948	0.00610317	1	0.226721	0.149171							Nudt7	0.487141	0.000580381	1	0.0953347	0.1678	Mvp	0.347261	0.00184687	1	0.148936	0.405405	Mturn	1.66448	3.26538e-06	0.023563	0.491094	0.299145	Mnda	0.478594	0.000104363	0.624819	0.140777	0.285333	Dedd	0.166112	0.00816926	1	0.025974	0.136364	Fxyd2	1.67382	0.0158518	1	0.477273	0.3	RP24-64C6.3	5.19665
Lyst	2.05166	0.00610654	1	0.105263	0.0574586							Rapgef3	1.85106	0.000605387	1	0.178499	0.102041	Nrros	0.580132	0.00185785	1	0.468085	0.684685	Epcam	0.758938	3.32946e-06	0.0240221	0.687023	0.739316	Acp5	0.608258	0.000104782	0.627223	0.223301	0.397333	Ppp1r18	1.40629	0.00820668	1	0.649351	0.487013	Rrbp1	0.170062	0.0161962	1	0.0454545	0.2	Pnn	0.540649
Gpr183	0.826092	0.00613023	1	0.506073	0.587845							Tdrd3	1.44264	0.000608002	1	0.332657	0.226757	Upb1	0.569712	0.00187745	1	0.404255	0.747748	Tacc1	1.61035	3.51915e-06	0.0253872	0.531807	0.324786	Cd36	1.81704	0.000106048	0.6347	0.402913	0.272	Rnase6	1.70432	0.00820988	1	0.38961	0.233766	Irf9	0.336677	0.0163611	1	0.0681818	0.245455	Bzw1	0.609001
Cyba	0.896292	0.00616036	1	0.773279	0.844199							Ggt1	0.666826	0.000608235	1	0.334686	0.410431	Snx12	2.15304	0.00191773	1	0.489362	0.243243	Hoxd10	1.85734	3.51917e-06	0.0253872	0.422392	0.24359	9930111J21Rik2	2.81471	0.000113154	0.677113	0.18932	0.0853333	Gpr160	2.80187	0.00826264	1	0.220779	0.103896	Csf2rb	0.598345	0.0163623	1	0.318182	0.572727	Ccdc59	0.254466
Bcl10	0.736804	0.00620872	1	0.291498	0.390055							Lyrm7	0.569025	0.000635577	1	0.109533	0.188209	Nucks1	2.11288	0.00193459	1	0.468085	0.243243	Wwp1	1.73381	3.59295e-06	0.0259123	0.435115	0.235043	Slc35c2	0.638559	0.000114099	0.682655	0.300971	0.488	Zfp36l2	1.44075	0.00826769	1	0.675325	0.506494	D8Ertd738e	1.24364	0.0164041	1	0.818182	0.754545	AY036118	1.37886
Lgals9	0.677679	0.00623813	1	0.17004	0.259669							Aldh1l1	0.817424	0.000637743	1	0.584178	0.61678	Slc15a4	0.524771	0.00197546	1	0.361702	0.621622	Mknk2	1.68668	3.5993e-06	0.0259546	0.478372	0.299145	Sirt7	0.613737	0.000115165	0.688916	0.320388	0.506667	Herpud2	4.329	0.00827591	1	0.12987	0.038961	Ddx24	3.08802	0.0165466	1	0.204545	0.0727273	Klrb1b	0.202988
Anxa11	0.688065	0.00633621	1	0.174089	0.262983							Taok2	1.60549	0.00065033	1	0.208925	0.122449	Xpo6	0.000665804	0.00199336	1	0	0.18018	Ccnl2	1.67673	3.60603e-06	0.0259995	0.473282	0.290598	Hspa1a	0.492158	0.000119152	0.712648	0.15534	0.301333	Ginm1	2.05007	0.00836307	1	0.25974	0.12987	Rin3	1.62766	0.0171472	1	0.522727	0.390909	Mgat1	0.241984
Mrpl40	0.502667	0.00635898	1	0.0688259	0.132597							Tmem27	1.31	0.000682162	1	0.448276	0.324263	Ptprb	3.03315	0.00200512	1	0.297872	0.0990991	Eva1a	1.46118	3.9172e-06	0.0282391	0.671756	0.495726	Cers5	0.610029	0.000126828	0.758433	0.18932	0.36	Rnf216	2.71087	0.00836661	1	0.207792	0.0909091	Ptma	1.85032	0.0172015	1	0.431818	0.263636	Pbld2	4.58104
Fkbp4	0.728915	0.00639633	1	0.251012	0.343646							Ywhaq	0.795411	0.000700125	1	0.515213	0.582766	Tax1bp3	3.18906	0.00203262	1	0.340426	0.144144	Usmg5	1.11389	3.95355e-06	0.0284972	0.984733	0.935897	Herc4	1.56559	0.000131424	0.785782	0.548544	0.442667	Asb2	1.74817	0.0083701	1	0.38961	0.233766	App	0.450502	0.0172389	1	0.181818	0.390909	Ncor1	1.68753
Malat1	0.948753	0.00644415	1	0.983806	0.992265							Ndufs5	0.906784	0.000705191	1	0.823529	0.868481	Rbpms	2.7733	0.00203519	1	0.361702	0.153153	Pard6b	1.91849	4.07795e-06	0.0293898	0.407125	0.230769	Snx6	0.623435	0.00013478	0.805715	0.199029	0.373333	Ppp1r15a	1.58156	0.0083717	1	0.558442	0.402597	Eif6	3.11436	0.0173465	1	0.227273	0.0909091	Glipr2	1.77926
Dctn3	0.702518	0.00644504	1	0.218623	0.311602							Sult1a1	1.37646	0.000747708	1	0.326572	0.217687	Edem2	0.527234	0.00205559	1	0.340426	0.585586	Kpnb1	2.08101	4.1967e-06	0.0302414	0.343511	0.175214	Atg3	0.658318	0.00013713	0.819627	0.354369	0.525333	Ppcdc	2.03798	0.0085074	1	0.285714	0.149351	Stat3	0.578821	0.0173798	1	0.295455	0.536364	Arhgap15	1.92018
Fth1	0.949942	0.0064752	1	0.97166	0.971271							Zfp938	1.77457	0.000756358	1	0.174442	0.0952381	Phf11d	3.88114	0.00205666	1	0.234043	0.0630631	Mapk15	2.31363	4.22578e-06	0.0304467	0.295165	0.132479	Irgm1	0.455588	0.000138158	0.825634	0.092233	0.218667	Tle1	2.40936	0.00869889	1	0.246753	0.123377	Fmo1	3.67382	0.0175512	1	0.181818	0.0636364	Phf13	4.51616
Rgs1	1.90797	0.00651876	1	0.121457	0.0685083							Hsbp1l1	0.526028	0.000756655	1	0.125761	0.201814	Tpm3-rs7	0.33085	0.00205939	1	0.12766	0.387387	Rnasek	2.22129	4.29888e-06	0.0309691	0.307888	0.149573	Psmc6	0.521523	0.000139029	0.830697	0.174757	0.330667	Irf1	1.94487	0.00870795	1	0.350649	0.207792	Pfn1	0.892962	0.0176107	1	0.954545	0.981818	Rpl12	1.14445
Rbbp4	0.769982	0.00657476	1	0.307692	0.41326							Scd2	0.698543	0.000759174	1	0.371197	0.433107	Nfkbid	0.486364	0.00207241	1	0.276596	0.540541	Rasd2	12.782	4.3963e-06	0.0316665	0.111959	0.0128205	Pdcd4	2.76442	0.000142594	0.851854	0.174757	0.0746667	Cyth3	5.1391	0.00883031	1	0.116883	0.0324675	Gng5	1.1419	0.0176882	1	0.840909	0.818182	Slc9a3r1	0.635119
Ncl	0.803355	0.00661061	1	0.437247	0.554696							Cs	0.808643	0.000782786	1	0.537525	0.612245	4833407H14Rik	0.118372	0.00210547	1	0.0212766	0.225225	Rps3	0.925215	4.45105e-06	0.0320565	0.931298	0.888889	Psme1	0.780786	0.000154025	0.919993	0.635922	0.746667	Arhgap17	1.78979	0.00891738	1	0.402597	0.24026	Orai3	0.000578405	0.0178748	1	0	0.118182	2610507B11Rik	2.52643
Sertad1	0.72316	0.00664381	1	0.226721	0.324862							Ankfy1	2.13669	0.000808012	1	0.11359	0.0521542	Cdc42ep1	3.50395	0.00215398	1	0.234043	0.0630631	Ndufa13	0.928893	4.47215e-06	0.0322039	0.949109	0.935897	Fam50a	0.605704	0.000156228	0.932993	0.208738	0.384	Cadm1	1.60148	0.00892543	1	0.480519	0.311688	Vti1a	0.000525733	0.0178748	1	0	0.118182	Rps27	1.08871
Nsa2	0.851169	0.00670424	1	0.578947	0.677348							Zfyve21	0.538815	0.000808157	1	0.105477	0.179138	Sema7a	2.8604	0.00217289	1	0.297872	0.0990991	Serp1	1.42406	4.51219e-06	0.0324878	0.709924	0.5	Arf4	0.735847	0.00015636	0.933624	0.495146	0.666667	Setd3	1.62929	0.00894601	1	0.415584	0.25974	Ncf1	1.49446	0.0180531	1	0.636364	0.5	Arpc2	0.831614
Ogfr	0.612688	0.0067702	1	0.129555	0.207735							Gtf2i	1.39281	0.000809855	1	0.334686	0.22449	Tex2	0.446617	0.00217464	1	0.234043	0.495495	Dbi	0.922065	4.53084e-06	0.0326175	0.941476	0.888889	Cyth4	0.744286	0.000156543	0.934564	0.548544	0.717333	Smad2	2.36541	0.00907789	1	0.246753	0.123377	Smim24	5.90127	0.0185238	1	0.136364	0.0363636	Smad4	3.31188
Csrnp1	0.694383	0.00691027	1	0.226721	0.317127							Lyrm9	1.48283	0.000826104	1	0.255578	0.160998	Kbtbd11	0.132709	0.00217767	1	0.0425532	0.243243	Enox1	2.15453	4.81767e-06	0.0346776	0.262087	0.102564	Ifrd1	0.651054	0.000157613	0.940793	0.359223	0.522667	Kat7	2.28939	0.00917246	1	0.155844	0.0519481	Wdr45b	3.50679	0.0186913	1	0.181818	0.0636364	Snap23	0.345683
Commd2	0.536816	0.00691725	1	0.0850202	0.151381							Tcf7l2	1.77196	0.000833592	1	0.127789	0.0612245	Stxbp2	0.462312	0.00219445	1	0.234043	0.513514	Ddr1	1.57414	4.91764e-06	0.0353923	0.544529	0.346154	Axl	0.200043	0.000164257	0.980287	0.0242718	0.114667	H2-Ob	3.49305	0.00918807	1	0.155844	0.0584416	BC017643	0.244251	0.0192267	1	0.0454545	0.2	S1pr5	0.594759
Hhex	0.686851	0.00692927	1	0.153846	0.241989							Fuom	0.670125	0.000837312	1	0.296146	0.37415	Ppfibp1	3.20981	0.00220421	1	0.234043	0.0630631	Acsl5	1.50845	4.92081e-06	0.0354102	0.620865	0.423077	Dbndd2	0.407261	0.000176115	1	0.0825243	0.202667	Sdc4	1.86391	0.0093049	1	0.402597	0.25974	Sucla2	6.29864	0.0194782	1	0.136364	0.0363636	Lypla2	0.575362
Psmd4	0.746317	0.00712369	1	0.279352	0.379006							Acsl5	1.40222	0.000854314	1	0.383367	0.274376	Tpm1	2.32292	0.00224122	1	0.489362	0.297297	Kcnj16	1.33756	5.01026e-06	0.0360489	0.78117	0.589744	Pea15a	0.505876	0.000177609	1	0.0825243	0.205333	Laptm4a	1.31681	0.00938016	1	0.727273	0.584416	Cbx4	4.92074	0.0194782	1	0.136364	0.0363636	Tyrobp	0.884224
Eif4a1	0.768266	0.00721983	1	0.331984	0.434254							Txnl4a	0.581679	0.000854339	1	0.166329	0.247166	Fam3c	0.536978	0.00230429	1	0.276596	0.558559	Sat1	1.26971	5.19251e-06	0.0373549	0.821883	0.735043	Cfp	0.636107	0.000182993	1	0.315534	0.48	Nrros	1.49189	0.00949967	1	0.571429	0.376623	Gm37168	4.79668	0.0194782	1	0.136364	0.0363636	Emb	2.8102
Ndufc2	0.741647	0.00735764	1	0.251012	0.345856							Atp6v1b2	0.680389	0.000861702	1	0.25355	0.340136	Fcer1g	0.684214	0.00237633	1	0.574468	0.765766	Gapdh	1.14412	5.2315e-06	0.0376302	0.954198	0.905983	Clec4b1	0.413657	0.000183861	1	0.092233	0.213333	Fkbp5	4.01837	0.0095101	1	0.12987	0.038961	Tmed2	1.76005	0.0197135	1	0.431818	0.281818	Tmem97	3.5809
Gdi1	0.732567	0.00737957	1	0.222672	0.320442							Spa17	2.09128	0.000863958	1	0.119675	0.0566893	Arhgap31	3.13264	0.00237809	1	0.276596	0.0900901	Ncor1	1.69224	5.39525e-06	0.0388026	0.463104	0.269231	Cyp20a1	0.25529	0.000184822	1	0.038835	0.136	Gls	2.58715	0.00958576	1	0.207792	0.0909091	Anapc11	2.78681	0.0197216	1	0.25	0.118182	Rlim	0.273363
Blvrb	0.729574	0.00743485	1	0.238866	0.343646							Gm10260	1.36933	0.000905434	1	0.359026	0.253968	Crip2	2.36102	0.00253177	1	0.446809	0.225225	Ccnl1	1.96785	5.49026e-06	0.0394805	0.368957	0.196581	Klf13	1.35386	0.000186987	1	0.65534	0.573333	Vav3	0.107665	0.00970897	1	0.012987	0.11039	Arhgap24	0.245466	0.019889	1	0.0454545	0.2	Ubald2	0.690061
Ranbp1	0.693657	0.00748101	1	0.210526	0.296133							Fip1l1	1.62845	0.000912932	1	0.182556	0.104308	Pacsin1	0.613847	0.0025814	1	0.468085	0.720721	Car2	1.39085	5.65487e-06	0.0406585	0.707379	0.495726	Slc35f5	0.284234	0.000190215	1	0.0242718	0.114667	Arhgef1	1.92113	0.00982697	1	0.324675	0.181818	Sh3glb1	0.590957	0.0200722	1	0.340909	0.6	Srpr	0.470404
Gatm	1.54993	0.00749328	1	0.157895	0.0972376							Slc22a12	0.450626	0.00091703	1	0.0669371	0.129252	Fam162a	2.57758	0.00258469	1	0.382979	0.171171	Mbnl1	1.79735	5.83064e-06	0.0419165	0.384224	0.200855	F11r	0.20138	0.00019974	1	0.0291262	0.12	Txndc5	2.25218	0.0098477	1	0.194805	0.0779221	Rere	3.14691	0.0201728	1	0.227273	0.1	Hmgn1	0.283353
Cndp2	0.515897	0.00756181	1	0.145749	0.214365							Gmps	0.526147	0.00095178	1	0.0933063	0.163265	Serinc3	1.15747	0.00258664	1	0.93617	0.918919	Rab17	1.81528	5.85266e-06	0.0420689	0.417303	0.239316	Med15	0.558941	0.000200803	1	0.15534	0.301333	Ptgs1	1.72674	0.00988357	1	0.337662	0.188312	Sra1	0.397976	0.0202503	1	0.136364	0.318182	Mars	0.000514296
Rbm17	0.700909	0.0075761	1	0.186235	0.283978							Fdps	0.622701	0.000954656	1	0.156187	0.24263	Emc10	0.5663	0.00259011	1	0.404255	0.666667	Ube2b	1.40411	5.89787e-06	0.042388	0.715013	0.495726	Stard4	0.300371	0.000204419	1	0.0485437	0.152	Rtp4	0.372759	0.00990599	1	0.12987	0.272727	Sec61g	0.205426	0.020312	1	0.0681818	0.218182	Cap1	0.758389
Fam50a	0.657972	0.0075773	1	0.121457	0.201105							Itgb5	1.34626	0.000994476	1	0.387424	0.278912	Lrp8	0.31501	0.00259786	1	0.12766	0.369369	Mapk1	1.80257	6.15507e-06	0.0442303	0.407125	0.235043	Cgnl1	3.05622	0.000206705	1	0.121359	0.04	Mrps14	0.484674	0.00993026	1	0.207792	0.376623	Oma1	4.97302	0.0204752	1	0.136364	0.0363636	Hsp90ab1	0.776942
Hist1h4i	1.74859	0.00766099	1	0.157895	0.100552							Rpl37	1.06928	0.00100184	1	0.841785	0.834467	Ccdc162	0.343931	0.00261203	1	0.0851064	0.324324	Hnrnpd	2.25545	6.19162e-06	0.0444868	0.312977	0.15812	H2-T23	0.762891	0.000208304	1	0.572816	0.698667	Impact	0.134804	0.0100954	1	0.012987	0.11039	Slc36a3os	3.20225	0.0206285	1	0.159091	0.0454545	Nt5c3b	0.184488
Pim1	0.753392	0.00769918	1	0.356275	0.446409							Serinc3	1.24196	0.0010125	1	0.626775	0.544218	H2-DMb1	0.515116	0.00262136	1	0.319149	0.585586	Mgea5	2.48574	6.37939e-06	0.0458295	0.264631	0.115385	Npc2	0.816132	0.000211334	1	0.679612	0.757333	Ints3	3.64693	0.0101867	1	0.12987	0.038961	Mtus1	0.381034	0.0206799	1	0.113636	0.290909	Tmed9	0.619783
Wdr43	1.56086	0.00770697	1	0.182186	0.119337							Aldoa	0.945335	0.00108424	1	0.920892	0.929705	Cmtm7	0.590087	0.00262634	1	0.446809	0.693694	Dynlt1a	3.6361	6.57998e-06	0.047264	0.170483	0.0470085	Akap13	1.30397	0.000217761	1	0.718447	0.64	5031439G07Rik	2.20676	0.0101927	1	0.168831	0.0584416	Zmat2	0.279294	0.0209199	1	0.0454545	0.2	Wars	0.148203
Tcf4	0.713598	0.00785839	1	0.210526	0.301657							Bag4	1.49551	0.00109488	1	0.31643	0.222222	Lag3	0.563873	0.00264272	1	0.404255	0.684685	Pde4dip	1.56285	6.7182e-06	0.0482501	0.491094	0.299145	Tuba1a	0.637898	0.000228477	1	0.334951	0.474667	Dazap2	1.29162	0.0102194	1	0.753247	0.636364	Dao	3.05521	0.0211673	1	0.181818	0.0636364	Dhx15	0.382967
Dtd1	0.487077	0.00788195	1	0.0688259	0.128177							Jak3	2.22018	0.00116162	1	0.125761	0.0634921	Usp7	0.229273	0.00264431	1	0.0851064	0.306306	Dph3	1.47852	6.75341e-06	0.0484962	0.638677	0.461538	Sbno2	0.654832	0.000229975	1	0.26699	0.445333	Cyp2e1	0.153607	0.0103139	1	0.025974	0.12987	Dck	0.557938	0.0211864	1	0.227273	0.454545	Lbr	0.54704
Abcf1	0.634664	0.00800236	1	0.133603	0.20884							Mertk	2.10349	0.00117721	1	0.125761	0.0634921	Gm11817	0.00066877	0.00267445	1	0	0.171171	1110008P14Rik	1.33477	6.87664e-06	0.0493743	0.753181	0.628205	H2-DMb2	0.501656	0.000232743	1	0.179612	0.314667	Rab6b	5.79807	0.0104472	1	0.103896	0.025974	Pdlim2	0.462038	0.0211991	1	0.159091	0.372727	Sbf1	2.01111
Cnn3	0.717679	0.00801643	1	0.230769	0.318232							Minpp1	0.525297	0.00119344	1	0.111562	0.181406	S100a16	2.45945	0.00269605	1	0.382979	0.162162	Gyltl1b	1.84451	7.10234e-06	0.0509877	0.358779	0.188034	Puf60	0.656238	0.000234304	1	0.354369	0.52	Tmem176b	1.18421	0.010534	1	0.883117	0.785714	Zmynd11	2.57546	0.0216534	1	0.272727	0.136364	Rpl23	1.08137
Glyat	1.48263	0.00803788	1	0.165992	0.101657							Timm13	0.857855	0.00120209	1	0.640974	0.687075	Caskin2	3.39493	0.00270698	1	0.234043	0.0630631	Ssbp4	1.86797	7.63931e-06	0.054835	0.381679	0.209402	Nbeal2	2.30253	0.000236191	1	0.23301	0.122667	Nr1d2	5.82713	0.0106117	1	0.103896	0.025974	Rps5	1.7904	0.0222439	1	0.431818	0.254545	Ppcdc	2.19426
Rnf2	0.633227	0.00818316	1	0.101215	0.174586							Pi4ka	1.41251	0.00122112	1	0.279919	0.183673	Trove2	3.89094	0.00272766	1	0.212766	0.0540541	Nudt19	1.33781	7.66551e-06	0.0550154	0.750636	0.568376	Erap1	0.349974	0.000240985	1	0.0582524	0.165333	Man1c1	3.01192	0.0106319	1	0.142857	0.0454545	Mdh1	1.94404	0.0224795	1	0.318182	0.145455	Arhgdia	0.788686
Degs1	0.657701	0.00818759	1	0.149798	0.230939							Rps27	1.10482	0.00128384	1	0.787018	0.75737	Maml1	5.89107	0.00275902	1	0.170213	0.036036	Nfic	1.43485	7.70569e-06	0.055296	0.648855	0.423077	Fabp5	0.404434	0.000241502	1	0.0970874	0.218667	Aasdhppt	3.44166	0.0109968	1	0.116883	0.0324675	Hmgcl	0.487278	0.0225149	1	0.181818	0.4	Hao2	3.18766
Rbbp7	0.718611	0.00830036	1	0.202429	0.291713							Hspa1a	0.485263	0.00131952	1	0.129817	0.201814	Lpp	3.46477	0.00276476	1	0.297872	0.117117	Sult1a1	2.33023	7.94644e-06	0.0570157	0.272265	0.119658	Rps27	1.0498	0.000242294	1	0.878641	0.896	Mcl1	1.58995	0.0110323	1	0.493506	0.344156	Dusp1	1.11096	0.0229831	1	1	0.963636	Stip1	0.371854
Luc7l3	0.641203	0.00830943	1	0.11336	0.187845							Osbp	1.53004	0.00132128	1	0.150101	0.0793651	Trib1	0.609811	0.00285334	1	0.468085	0.738739	Stk39	1.71322	7.95932e-06	0.0571001	0.430025	0.24359	Ssh2	1.40505	0.000243209	1	0.616505	0.501333	Man2b2	1.95405	0.0110688	1	0.298701	0.155844	Pik3ca	3.52235	0.0231649	1	0.136364	0.0363636	Cuedc2	0.242658
B3gnt5	1.40062	0.0084261	1	0.336032	0.274033							Cisd1	0.907871	0.00133215	1	0.764706	0.780045	Prr13	0.767432	0.00287573	1	0.765957	0.846847	Pptc7	2.05369	8.09013e-06	0.0580305	0.346056	0.183761	Hao2	3.08545	0.000243481	1	0.179612	0.0826667	Il6ra	1.89596	0.0111405	1	0.311688	0.168831	Larp7	4.53567	0.0231649	1	0.136364	0.0363636	Rps19	1.10803
Orai3	0.577505	0.00851547	1	0.0890688	0.155801							Syne1	1.65209	0.001335	1	0.174442	0.0997732	Cdipt	0.427146	0.00288492	1	0.234043	0.486486	Akt1	2.1171	8.13794e-06	0.0583653	0.292621	0.136752	Psmg4	0.636261	0.000243601	1	0.203883	0.365333	Adap2	1.62342	0.0111676	1	0.402597	0.24026	Supt6	0.000573532	0.0233665	1	0	0.109091	Tmco1	0.304777
Atg3	0.680909	0.00853722	1	0.157895	0.240884							Afm	0.655762	0.0013497	1	0.20284	0.285714	Lsg1	0.342124	0.00289415	1	0.12766	0.369369	Osbpl6	1.64187	8.79442e-06	0.0630648	0.486005	0.311966	Fdft1	0.364463	0.000244372	1	0.0582524	0.165333	Eml2	2.64793	0.0112059	1	0.12987	0.038961	Milr1	0.00056261	0.0233665	1	0	0.109091	Gpd2	0.308946
Pigp	1.53802	0.00880661	1	0.202429	0.139227							Kdm1b	2.084	0.0013612	1	0.180527	0.111111	Synj1	2.66478	0.00290382	1	0.297872	0.108108	Sult1d1	1.39301	9.2164e-06	0.0660816	0.715013	0.5	Fam26f	0.482872	0.000246431	1	0.0631068	0.178667	Rab20	2.74654	0.0114241	1	0.233766	0.116883	Trappc9	0.000681414	0.0233665	1	0	0.109091	Dnaja1	0.610568
S1pr1	1.16621	0.0088985	1	0.639676	0.576796							Dtnb	1.54209	0.00138665	1	0.146045	0.0770975	Fam189b	7.01157	0.00291252	1	0.170213	0.036036	Mmd	1.71463	1.01802e-05	0.0729816	0.468193	0.299145	Mrpl30	0.68422	0.000252458	1	0.393204	0.570667	Csf2ra	1.34079	0.0114356	1	0.727273	0.564935	Mmp25	0.000544637	0.0233665	1	0	0.109091	Zkscan17	2.26161
Fam58b	0.489627	0.00891711	1	0.0526316	0.108287							Hoxd3os1	1.84839	0.00143789	1	0.127789	0.0634921	Asun	0.187682	0.00296855	1	0.0638298	0.27027	Erbb2ip	1.6188	1.02332e-05	0.0733519	0.475827	0.290598	Rpl21	1.08903	0.000262016	1	0.864078	0.856	Smim12	1.95745	0.0115614	1	0.246753	0.116883	Dfna5	0.430089	0.0234335	1	0.136364	0.327273	Smyd2	4.57133
Ugt2b38	0.391867	0.00907174	1	0.0647773	0.119337							Ptpra	1.87727	0.00145423	1	0.146045	0.0816327	Mctp2	0.45003	0.00299141	1	0.234043	0.504505	Atp5s	2.83187	1.02921e-05	0.0737632	0.185751	0.0598291	Aacs	0.44506	0.000268372	1	0.0776699	0.192	Orc4	2.55733	0.011656	1	0.168831	0.0649351	Tmub2	0.164097	0.0234958	1	0.0227273	0.154545	Zeb1	2.80239
Slc9a3r1	0.71533	0.00915305	1	0.210526	0.295028							Dlg5	1.5784	0.00146702	1	0.172414	0.0975057	Smdt1	0.71909	0.0030119	1	0.659574	0.864865	Tpm1	1.49204	1.03871e-05	0.0744338	0.572519	0.376068	Aif1	0.592301	0.00026886	1	0.276699	0.416	Cinp	0.0425928	0.011692	1	0.012987	0.103896	Emilin2	0.661698	0.0239295	1	0.431818	0.636364	Mfap1a	1.85991
Usf1	0.669998	0.0093061	1	0.145749	0.224309							Peli2	1.63947	0.00147053	1	0.182556	0.106576	Ppp1r9b	2.736	0.00301472	1	0.340426	0.144144	Rps21	1.14511	1.07708e-05	0.0771727	0.951654	0.880342	Leprot	0.638611	0.000271732	1	0.23301	0.389333	Irak2	1.54061	0.0118183	1	0.441558	0.272727	Lsp1	1.14386	0.0239389	1	0.977273	0.909091	Serf2	0.906186
Tex264	0.557701	0.009444	1	0.0809717	0.144751							Zfp91	1.6502	0.00147468	1	0.229209	0.14966	Jup	2.94976	0.0030563	1	0.361702	0.162162	Ntn4	3.09686	1.0823e-05	0.0775357	0.180662	0.0555556	Pigf	0.188964	0.000274147	1	0.0242718	0.109333	Ctla2b	3.45061	0.0118286	1	0.103896	0.025974	Dock8	0.36798	0.0245218	1	0.0909091	0.263636	Cops3	0.121259
Gm11808	0.566652	0.00950015	1	0.0850202	0.149171							H2afz	0.778814	0.00147924	1	0.472617	0.528345	Slc9a3r2	2.39665	0.0030737	1	0.361702	0.144144	Tnrc6b	1.75693	1.09428e-05	0.0783833	0.409669	0.230769	Xpnpep1	0.52145	0.000276376	1	0.121359	0.253333	Timp2	1.99133	0.0119425	1	0.298701	0.162338	Actn1	1.94501	0.0245942	1	0.386364	0.236364	Cyp51	4.05127
Smim12	0.571396	0.00954031	1	0.101215	0.165746							Zzz3	1.71553	0.00147989	1	0.141988	0.0748299	Hspa12b	7.32235	0.00307377	1	0.170213	0.036036	Cox4i1	0.956265	1.17501e-05	0.084154	0.984733	0.974359	Hist1h1c	1.65438	0.00028193	1	0.407767	0.285333	Wdr3	3.06148	0.0121606	1	0.116883	0.0324675	Gbas	7.76903	0.0246799	1	0.113636	0.0272727	AW112010	0.939276
Edem2	0.558999	0.00957235	1	0.0769231	0.140331							Lynx1	0.603804	0.00149258	1	0.148073	0.226757	Zfp503	8.09961	0.00307377	1	0.170213	0.036036	Hmgcs1	1.46399	1.18142e-05	0.0846016	0.613232	0.42735	Tgfbi	0.760343	0.00028512	1	0.548544	0.661333	Zfp281	2.99531	0.0121966	1	0.181818	0.0779221	Sp2	6.90766	0.0246799	1	0.113636	0.0272727	Psmd8	0.515592
Psmc2	0.688728	0.00966063	1	0.174089	0.259669							Zcchc11	1.80929	0.00152275	1	0.125761	0.0634921	Abca3	2.4501	0.00309821	1	0.319149	0.126126	Neat1	1.41217	1.25794e-05	0.0900688	0.641221	0.491453	Supt16	0.55595	0.000287125	1	0.131068	0.266667	Krit1	3.02906	0.0122638	1	0.155844	0.0584416	Serpinb6a	10.7456	0.0246799	1	0.113636	0.0272727	Tprn	4.06703
Myo1c	1.24116	0.00967155	1	0.453441	0.375691							Zdhhc1	1.69431	0.00152869	1	0.146045	0.0770975	Prkcdbp	2.46756	0.00310773	1	0.382979	0.171171	Lama5	1.82392	1.30887e-05	0.0937021	0.368957	0.209402	Ly86	0.733062	0.000289522	1	0.509709	0.616	Hsp90ab1	0.867116	0.0124039	1	0.779221	0.792208	Gm42418	1.05123	0.0247232	1	1	1	Arl8a	2.59987
Magoh	0.691178	0.0097585	1	0.165992	0.251934							Echs1	0.848458	0.00152933	1	0.626775	0.678005	Stx7	0.654632	0.00312265	1	0.553191	0.783784	Prmt6	3.27659	1.37836e-05	0.0986632	0.157761	0.042735	Mrpl36	0.607495	0.000296784	1	0.237864	0.4	Rps12-ps3	1.63185	0.0126523	1	0.376623	0.220779	Prkab1	5.08619	0.0248467	1	0.159091	0.0545455	Rps16	1.0643
Mea1	0.690239	0.00985475	1	0.165992	0.250829							Gde1	0.774863	0.00153515	1	0.442191	0.510204	Rapgef4	4.78385	0.00312352	1	0.191489	0.045045	Vamp2	1.37766	1.42577e-05	0.102043	0.704835	0.547009	Clec4a1	0.759491	0.000297426	1	0.553398	0.693333	Twistnb	2.00129	0.0126645	1	0.25974	0.136364	Pnp	0.182137	0.0248472	1	0.0227273	0.154545	Cpt1a	2.44717
Slc2a1	0.59134	0.00986172	1	0.0931174	0.156906							Slc41a3	1.60279	0.00155096	1	0.156187	0.0861678	Timm13	0.639477	0.00314441	1	0.510638	0.738739	Luc7l2	1.69377	1.44138e-05	0.103145	0.43257	0.260684	Nfkbie	0.539328	0.000311012	1	0.228155	0.373333	Mbnl2	1.60476	0.0127532	1	0.480519	0.331169	Tmcc1	0.499272	0.0249089	1	0.181818	0.381818	Ldb1	2.59348
Rab5c	0.72439	0.0100036	1	0.210526	0.302762							Asph	1.61203	0.00155837	1	0.168357	0.0952381	Abhd12	2.38645	0.00320392	1	0.361702	0.153153	Rragd	1.45422	1.46489e-05	0.104813	0.625954	0.444444	Il4ra	0.520646	0.000317718	1	0.116505	0.248	Cutc	3.24427	0.012772	1	0.103896	0.025974	Cpeb2	0.258669	0.0249993	1	0.0454545	0.190909	Vamp4	1.91399
Tomm40	0.682686	0.0101391	1	0.129555	0.21105							Cep164	2.19269	0.0016513	1	0.129817	0.0680272	H2-Aa	0.683974	0.00321104	1	0.531915	0.720721	Fkbp11	2.35106	1.47067e-05	0.105212	0.21374	0.0769231	Mrpl49	0.332102	0.0003284	1	0.0533981	0.154667	Dhrs7	2.51597	0.0127834	1	0.233766	0.116883	Oas3	0.256087	0.0249993	1	0.0454545	0.190909	Shfm1	0.747505
Srm	0.498537	0.0101815	1	0.0607287	0.117127							Aldoc	1.88329	0.00167148	1	0.160243	0.0929705	Ctnnd1	29.6302	0.00327788	1	0.106383	0.00900901	Tfcp2l1	1.32843	1.49173e-05	0.106704	0.753181	0.594017	Ifi204	0.617067	0.000333788	1	0.237864	0.4	Ggh	1.88587	0.0131953	1	0.337662	0.201299	Cdkn1a	2.22368	0.0252891	1	0.295455	0.145455	Eif4a3	0.455766
Ssh2	1.35373	0.0102824	1	0.315789	0.240884							1110001J03Rik	0.890667	0.0016721	1	0.736308	0.77551	Syt11	35.3706	0.00327788	1	0.106383	0.00900901	Sec61g	1.26194	1.51513e-05	0.108362	0.826972	0.696581	Ebp	0.629968	0.00033964	1	0.257282	0.421333	C5ar1	1.5197	0.0132666	1	0.506494	0.337662	Tmed9	2.85156	0.0253124	1	0.204545	0.0818182	Madd	2.69848
Pepd	0.572727	0.0104733	1	0.0890688	0.152486							Mrpl34	0.827995	0.00168651	1	0.58215	0.619048	Hs3st3b1	3.39739	0.00329539	1	0.212766	0.0540541	Sgpl1	2.26537	1.52166e-05	0.108814	0.259542	0.111111	Acsl4	0.385901	0.000345219	1	0.0485437	0.149333	Phf12	3.38648	0.0133447	1	0.142857	0.0519481	Evi2a	0.310968	0.0253506	1	0.0681818	0.227273	Inpp4b	3.74095
2810428I15Rik	0.645499	0.0105192	1	0.125506	0.2							Tpi1	0.907522	0.00169962	1	0.787018	0.798186	Man1b1	0.26816	0.00332003	1	0.106383	0.324324	Purb	1.75384	1.52172e-05	0.108814	0.399491	0.235043	Pcbd2	0.487517	0.000346487	1	0.106796	0.232	Slc25a51	2.54915	0.0135062	1	0.168831	0.0649351	Mbp	1.81742	0.0253537	1	0.409091	0.254545	Rpl26	1.07674
Rpl8	1.01744	0.0105192	1	0.963563	0.971271							Atp5b	0.957187	0.00171016	1	0.935091	0.941043	Trp53rkb	9.47044	0.00340082	1	0.148936	0.027027	Tmem167	1.67467	1.54313e-05	0.110318	0.435115	0.25641	Dusp1	1.11268	0.000351454	1	0.898058	0.88	Rpl12	1.21376	0.0135186	1	0.883117	0.785714	Rpl35a	1.3745	0.0254842	1	0.613636	0.509091	Apopt1	2.24525
Osbpl8	0.62593	0.0105796	1	0.109312	0.181215							Sesn1	1.99952	0.00172897	1	0.144016	0.0793651	Nhsl2	13.3031	0.00340148	1	0.106383	0.00900901	Eif5b	1.58033	1.56941e-05	0.112182	0.486005	0.303419	Tmem123	0.594906	0.00035381	1	0.199029	0.354667	Txndc12	0.301036	0.0135246	1	0.0779221	0.201299	Skil	0.0589836	0.025667	1	0.0227273	0.145455	Nup43	4.53412
Naa50	1.42655	0.0106359	1	0.283401	0.21989							1500011B03Rik	1.40963	0.00174348	1	0.296146	0.201814	Magee1	14.1819	0.00340148	1	0.106383	0.00900901	Flnb	1.6781	1.57632e-05	0.11266	0.430025	0.24359	Prdx5	1.14681	0.00035524	1	0.815534	0.805333	Cx3cr1	1.38404	0.0136372	1	0.675325	0.493506	Rpl10a	2.26177	0.0258373	1	0.227273	0.0909091	Wdr1	0.709164
Rpl36	1.02319	0.0107303	1	0.967611	0.974586							Ddt	0.861856	0.00175289	1	0.661258	0.687075	Reck	22.1154	0.00340148	1	0.106383	0.00900901	Tuba4a	1.42635	1.62168e-05	0.115886	0.648855	0.487179	Cd300lh	0.568114	0.000366798	1	0.160194	0.301333	Eef1a1	0.9653	0.0136818	1	1	0.993506	Fam160b1	4.25742	0.026494	1	0.159091	0.0545455	Plek	0.63979
Eif3g	0.736118	0.0110734	1	0.165992	0.250829							Mtmr3	1.5546	0.00176333	1	0.174442	0.102041	Arhgef5	20.1198	0.00340148	1	0.106383	0.00900901	Iqgap1	1.55035	1.62714e-05	0.116259	0.51145	0.333333	Rabgef1	0.319229	0.000371495	1	0.0485437	0.146667	Rnf130	2.14955	0.0137261	1	0.272727	0.149351	Iqsec1	0.43196	0.026572	1	0.136364	0.309091	Akr1c21	2.95471
Brd2	0.798708	0.0112622	1	0.417004	0.511602							Ccnl1	0.569511	0.0018066	1	0.123732	0.192744	Il6st	2.37943	0.00344071	1	0.361702	0.171171	Pgls	1.35679	1.64109e-05	0.11724	0.717557	0.525641	Farsb	0.486541	0.000374787	1	0.092233	0.213333	Smarce1	0.265996	0.0137739	1	0.0779221	0.201299	Abhd2	4.56579	0.0267479	1	0.113636	0.0272727	Dnajb4	0.000586344
Stx12	0.493547	0.0112921	1	0.0647773	0.121547							Kcnj16	1.2195	0.00182451	1	0.624746	0.512472	Tcirg1	0.619637	0.00348906	1	0.510638	0.720721	2410002F23Rik	2.01468	1.64829e-05	0.117737	0.340967	0.183761	Fastk	0.543745	0.000379312	1	0.092233	0.213333	Fbxo34	3.59932	0.0138441	1	0.142857	0.0519481	Stx8	5.85355	0.0267479	1	0.113636	0.0272727	Zbp1	0.243112
Spi1	0.77185	0.0114146	1	0.299595	0.409945							Letm1	0.756113	0.00183454	1	0.377282	0.444444	Natd1	11.3908	0.00351983	1	0.12766	0.018018	Smg5	2.35706	1.65794e-05	0.11841	0.236641	0.0982906	Lsr	0.469166	0.000382648	1	0.0776699	0.189333	C3ar1	1.45169	0.0139978	1	0.571429	0.435065	Pak2	1.53574	0.0274039	1	0.590909	0.409091	Proser1	2.65346
Uap1	0.580669	0.0115622	1	0.0526316	0.108287							Ddo	0.633099	0.00184558	1	0.180527	0.256236	Zfp704	16.3908	0.0035293	1	0.106383	0.00900901	Tjp3	2.21758	1.65956e-05	0.118509	0.256997	0.111111	S100a11	0.797251	0.000384217	1	0.660194	0.762667	Ccdc47	2.62199	0.0140133	1	0.181818	0.0779221	Mysm1	4.81261	0.0274697	1	0.113636	0.0272727	Zc3h15	0.499685
Ccdc88c	1.42611	0.0118273	1	0.214575	0.148066							Uqcr10	0.939864	0.00184602	1	0.894523	0.929705	Tnfsf12	10.9869	0.0035293	1	0.106383	0.00900901	Noct	2.28931	1.68708e-05	0.120457	0.246819	0.102564	Clic1	0.844744	0.000393052	1	0.76699	0.850667	Mvp	1.91119	0.0140354	1	0.272727	0.142857	Ctsd	0.828873	0.0275898	1	0.75	0.836364	Idh1	2.47125
Crebbp	1.51586	0.0118721	1	0.214575	0.151381							mt-Nd4	1.03222	0.00184887	1	0.967546	0.979592	Eno1	1.45787	0.00355207	1	0.808511	0.63964	Cyp2u1	2.37062	1.6935e-05	0.120899	0.246819	0.106838	Fkbp5	4.29578	0.00039451	1	0.126214	0.048	Ogfr	0.376359	0.0142069	1	0.116883	0.253247	Rpl15	1.75575	0.0278203	1	0.409091	0.236364	Cstf2	0.176907
Mrpl28	0.665221	0.011965	1	0.129555	0.201105							Mpc1	0.922756	0.00185725	1	0.843813	0.85941	Rgs7bp	0.000672715	0.00357967	1	0	0.162162	Zfp810	4.73073	1.69562e-05	0.121033	0.152672	0.042735	Usp18	0.201711	0.000394923	1	0.0242718	0.106667	Rps27rt	1.51792	0.0142076	1	0.480519	0.305195	Mapk3	0.277708	0.0280731	1	0.0454545	0.190909	Srgap3	3.03234
Il10ra	1.24017	0.0119705	1	0.45749	0.392265							Tspan1	1.33045	0.00186736	1	0.411765	0.321995	Cdh1	0.162771	0.00358261	1	0.0425532	0.243243	Mllt6	2.28369	1.69646e-05	0.121077	0.256997	0.111111	Hpgd	2.66518	0.000398173	1	0.160194	0.0693333	Lmbrd1	2.10645	0.0144426	1	0.272727	0.149351	Notch1	1.94975	0.0280752	1	0.363636	0.209091	S1pr4	1.62914
Txndc15	0.5464	0.0120473	1	0.0607287	0.116022							Keg1	0.493157	0.00189538	1	0.11359	0.179138	Dab2ip	6.93805	0.00360331	1	0.148936	0.027027	Usf2	2.23814	1.73217e-05	0.123608	0.274809	0.132479	Arl1	0.637088	0.000409769	1	0.257282	0.408	Plekhm3	2.32408	0.0146362	1	0.207792	0.0974026	Gatm	2.22848	0.0280982	1	0.295455	0.145455	Rabgap1	3.29759
H1f0	2.2187	0.0120538	1	0.109312	0.0651934							Taok3	1.68712	0.00192976	1	0.127789	0.0657596	Rasip1	4.76143	0.00360759	1	0.170213	0.036036	Adgra3	2.2333	1.76673e-05	0.126056	0.302799	0.15812	Lgmn	0.704807	0.000412261	1	0.451456	0.592	Zfhx3	1.884	0.0146948	1	0.337662	0.201299	Arrdc3	1.81141	0.0281339	1	0.409091	0.263636	Wdr20	2.86034
Casp8	0.619905	0.0121249	1	0.0931174	0.158011							Psma2	0.782033	0.00198132	1	0.423935	0.501134	Adk	0.499089	0.00361058	1	0.212766	0.504505	Smim5	1.48938	1.81394e-05	0.129407	0.575064	0.384615	Naaa	0.634369	0.000415671	1	0.281553	0.432	Myadm	1.40603	0.0148096	1	0.623377	0.441558	Hoga1	4.94048	0.0282083	1	0.113636	0.0272727	Ero1lb	4.01767
Nfkbiz	0.582843	0.0121431	1	0.0688259	0.128177							Sod2	0.886652	0.00198521	1	0.701826	0.723356	Emp1	3.36437	0.00363038	1	0.234043	0.0720721	Cul3	2.01517	1.90326e-05	0.13576	0.310433	0.15812	Ciita	0.400279	0.000421071	1	0.0533981	0.154667	Myo1f	1.48356	0.0148177	1	0.454545	0.292208	Pknox1	3.72053	0.0282348	1	0.159091	0.0545455	Whsc1	3.14682
Xpa	0.625879	0.0122381	1	0.0890688	0.154696							Sec61g	1.17405	0.0020098	1	0.716024	0.637188	Lims2	3.24234	0.00366372	1	0.297872	0.117117	Rps28	1.16803	2.02558e-05	0.144464	0.94402	0.850427	Phf11b	0.579789	0.000431078	1	0.145631	0.282667	Btg2	1.35273	0.014866	1	0.649351	0.474026	mt-Co3	1.11168	0.0282559	1	0.977273	0.981818	Fasn	2.19637
Tnpo1	0.602836	0.0122512	1	0.097166	0.161326							Mrps36	0.839991	0.0020124	1	0.563895	0.612245	Thrsp	5.89365	0.00370861	1	0.148936	0.027027	Hspa8	0.912525	2.06399e-05	0.147183	0.923664	0.867521	Ubc	0.856457	0.000457542	1	0.815534	0.866667	1700017B05Rik	2.86444	0.0148764	1	0.168831	0.0714286	Snai1	0.135461	0.0287345	1	0.0227273	0.145455	Med20	3.80292
Pdcd6	0.690723	0.0122731	1	0.153846	0.235359							Rcor1	0.492519	0.00203393	1	0.0608519	0.117914	Col18a1	7.0566	0.00370861	1	0.148936	0.027027	Ddx6	1.6374	2.08296e-05	0.148515	0.412214	0.230769	Anxa3	0.518873	0.000465636	1	0.15534	0.282667	Fam114a2	1.80474	0.0148794	1	0.246753	0.116883	9030624J02Rik	5.42551	0.0289639	1	0.113636	0.0272727	Maf	2.40642
Apex1	0.497236	0.0123848	1	0.0607287	0.116022							Deptor	1.3914	0.00207925	1	0.344828	0.247166	Mrrf	7.39119	0.00379815	1	0.106383	0.00900901	Rbm39	1.32838	2.14898e-05	0.1532	0.760814	0.598291	Gm10260	1.26182	0.000466749	1	0.665049	0.642667	Rnf220	3.43163	0.0148925	1	0.142857	0.0519481	Rps24	1.42845	0.0292171	1	0.590909	0.463636	Aar2	3.00299
Cyp2e1	0.477092	0.0125388	1	0.0728745	0.128177							Prodh	0.617694	0.00208742	1	0.144016	0.21542	Rapgef5	7.63445	0.00379815	1	0.106383	0.00900901	Arl4d	2.43218	2.15059e-05	0.153294	0.208651	0.0769231	Snrpc	0.683078	0.000473176	1	0.31068	0.485333	Acp2	0.342594	0.0150871	1	0.038961	0.149351	Rnaseh2c	0.165232	0.0292758	1	0.0227273	0.145455	Rce1	0.154638
Stradb	0.495312	0.0127491	1	0.0526316	0.104972							Vdac3	0.759648	0.002093	1	0.401623	0.46712	Fas	4.00736	0.00380346	1	0.170213	0.036036	Cirbp	1.55554	2.16807e-05	0.154518	0.534351	0.358974	Chid1	0.469303	0.000495252	1	0.0631068	0.170667	Cdc42se2	1.43912	0.0152654	1	0.493506	0.324675	Atp2b1	2.0956	0.0296837	1	0.318182	0.163636	Rps15a	1.08117
Slc15a4	0.720499	0.0128247	1	0.222672	0.298343							Ldhb	0.958496	0.00211079	1	0.959432	0.965986	Nr1d1	3.31412	0.00380874	1	0.191489	0.045045	Mllt4	1.90761	2.23678e-05	0.159393	0.318066	0.162393	Ssr2	0.672959	0.000496895	1	0.31068	0.472	Mybbp1a	0.45856	0.0153577	1	0.0909091	0.227273	2310015A10Rik	0.158504	0.0298254	1	0.0227273	0.145455	Rasal3	1.50491
Rps10	1.01481	0.0128295	1	0.963563	0.973481							Gm26917	1.39332	0.00211426	1	0.407708	0.319728	Tjp1	6.48555	0.00381671	1	0.148936	0.027027	Glis3	2.42871	2.27287e-05	0.161942	0.21883	0.0897436	Ubb	0.923766	0.00050087	1	0.902913	0.922667	Tspan13	1.76574	0.0154899	1	0.38961	0.246753	Irf2bp2	3.70031	0.0300733	1	0.159091	0.0545455	Gstm5	3.54541
Pcmtd1	1.3177	0.0128703	1	0.384615	0.319337							Rpl9	1.22284	0.00212511	1	0.606491	0.496599	Sema3g	6.47031	0.00381671	1	0.148936	0.027027	Alkbh5	1.69994	2.28085e-05	0.162488	0.389313	0.213675	Sec61a1	0.628517	0.000503239	1	0.296117	0.450667	Rbm34	2.72787	0.0156297	1	0.142857	0.0519481	Fabp5	0.408434	0.0301096	1	0.0909091	0.254545	Naa50	0.253047
Atl3	1.5193	0.0129719	1	0.194332	0.134807							Eif5a	0.852326	0.00220746	1	0.598377	0.646259	Acvrl1	3.77786	0.00387192	1	0.234043	0.0720721	Pkm	1.19409	2.30655e-05	0.164296	0.959288	0.846154	Psap	0.939196	0.000508173	1	0.936893	0.952	Atp6v0b	1.40214	0.0156773	1	0.662338	0.461039	Zfp608	0.170008	0.0303839	1	0.0227273	0.145455	Gpr183	3.17353
Ndufa10	0.697515	0.0130037	1	0.17004	0.247514							Crim1	1.63109	0.00224649	1	0.174442	0.104308	Rpl28	0.933336	0.00391389	1	0.978723	0.954955	Eif1	1.08808	2.36528e-05	0.168455	0.959288	0.923077	Ifi30	0.738001	0.000511931	1	0.5	0.626667	Mef2a	1.64856	0.0158043	1	0.38961	0.24026	Sde2	0.408163	0.0305408	1	0.0909091	0.254545	Itgam	0.143712
Snx6	0.731565	0.0131633	1	0.153846	0.237569							Coa3	0.745269	0.00224801	1	0.356998	0.437642	Pik3r6	4.87396	0.00393944	1	0.106383	0.00900901	Ppp1r1b	0.721205	2.36993e-05	0.168763	0.587786	0.666667	Itm2c	0.689719	0.000514055	1	0.42233	0.565333	Scaf4	4.78896	0.0158267	1	0.12987	0.0454545	Gad1-ps	2.1188	0.0309602	1	0.272727	0.136364	B3gnt7	0.000604314
Rapgef3	0.576294	0.0132892	1	0.0688259	0.127072							Mien1	0.836361	0.00226706	1	0.561866	0.60771	Plscr1	3.1361	0.00396647	1	0.276596	0.0990991	Lrrc51	3.09295	2.43879e-05	0.173642	0.160305	0.0470085	Pla2g15	0.361839	0.000536315	1	0.0631068	0.165333	Sec22b	0.312746	0.0162027	1	0.0649351	0.181818	Ier3	0.563934	0.0318902	1	0.295455	0.463636	Scamp4	0.000656378
Pop5	0.698963	0.013357	1	0.145749	0.222099							Abca2	1.47784	0.0022691	1	0.219067	0.138322	Msrb3	6.38104	0.00404153	1	0.148936	0.027027	Gclc	2.0933	2.4625e-05	0.175305	0.305344	0.162393	Nmi	0.559163	0.000551328	1	0.145631	0.277333	Smndc1	1.66791	0.0162197	1	0.337662	0.201299	Ifi27	0.335121	0.0319118	1	0.0681818	0.218182	Mrpl39	0.000627357
Fau	1.00869	0.0133574	1	0.975709	0.98453							Gm16010	1.70651	0.0023444	1	0.131846	0.0702948	Plpp1	2.50167	0.00406527	1	0.361702	0.162162	Zmiz1	1.42187	2.48227e-05	0.176688	0.631043	0.448718	Ctsa	0.84175	0.000576148	1	0.752427	0.826667	Sh2b3	2.09417	0.0164192	1	0.285714	0.162338	Gnai3	0.391364	0.0319996	1	0.113636	0.272727	Anxa2	0.797022
Ubl5	0.857856	0.0134745	1	0.518219	0.59337							Cdk5rap1	0.4958	0.00240935	1	0.0791075	0.138322	Akirin2	6.64048	0.004128	1	0.12766	0.018018	Rap1gap	1.40856	2.48785e-05	0.17706	0.666667	0.482906	Slfn5	0.552011	0.000595862	1	0.145631	0.277333	Yeats4	1.76887	0.0165141	1	0.285714	0.155844	Kdm3b	0.187932	0.0321136	1	0.0227273	0.145455	Klrb1f	1.4416
Rock2	0.534385	0.0134939	1	0.0607287	0.116022							Pgk1	0.855761	0.00242374	1	0.612576	0.650794	Tnfrsf22	8.14886	0.004128	1	0.12766	0.018018	Trabd2b	1.80732	2.51601e-05	0.179039	0.338422	0.179487	Tcp1	0.661369	0.000596609	1	0.320388	0.48	G3bp2	1.57725	0.0167734	1	0.441558	0.311688	Stk24	0.285626	0.0329386	1	0.0454545	0.181818	Herpud1	0.524658
Litaf	0.564899	0.0135059	1	0.0688259	0.125967							Uqcrc2	0.888546	0.00249339	1	0.72211	0.725624	1110004E09Rik	7.94721	0.004128	1	0.12766	0.018018	Mark3	1.93948	2.64891e-05	0.18847	0.295165	0.145299	Sp100	0.713881	0.000597733	1	0.407767	0.56	Trem2	2.78337	0.0167957	1	0.142857	0.0519481	Ccl3	3.38565	0.0336032	1	0.204545	0.0909091	Pdcd5	0.55589
Hrsp12	1.33785	0.0135803	1	0.271255	0.194475							Arf3	1.39565	0.00255775	1	0.294118	0.208617	Zfp639	2.93623	0.00415565	1	0.212766	0.0540541	Maged1	1.65447	2.65248e-05	0.188698	0.445293	0.269231	Cops2	0.572057	0.000598357	1	0.165049	0.306667	Lonp2	2.5761	0.0170481	1	0.194805	0.0909091	Ilkap	2.34074	0.0337942	1	0.25	0.118182	Cacybp	0.428954
Vbp1	0.625442	0.0137567	1	0.097166	0.161326							Fabp3	1.11562	0.00255881	1	0.858012	0.800454	Rapgef3	5.96141	0.00415839	1	0.148936	0.027027	Nrbf2	2.6717	2.69768e-05	0.191886	0.211196	0.0854701	Psma4	0.72806	0.000605595	1	0.34466	0.525333	Card11	2.75343	0.017201	1	0.142857	0.0519481	Txndc12	0.0687615	0.0338182	1	0.0227273	0.136364	Cst7	0.640439
Tnfrsf13c	1.20825	0.0137915	1	0.497976	0.435359							Lsm2	0.56809	0.00260605	1	0.0791075	0.14059	Sgk1	2.76735	0.00416426	1	0.340426	0.162162	Sphk2	1.78003	2.73336e-05	0.194397	0.374046	0.217949	Ddx18	0.53914	0.000607691	1	0.121359	0.248	Hectd1	1.95735	0.0172162	1	0.25974	0.12987	Hmox1	0.221308	0.0339264	1	0.0227273	0.145455	Pcnx	3.14377
Herpud1	1.20823	0.0139387	1	0.538462	0.475138							Tmem178	0.484793	0.00264339	1	0.0669371	0.122449	Txnip	1.32627	0.00416642	1	0.829787	0.810811	Smco4	1.60067	2.76196e-05	0.196403	0.496183	0.337607	Faf1	0.451392	0.000609796	1	0.092233	0.205333	Dph3	1.96443	0.0172713	1	0.285714	0.155844	Gsr	1.18858	0.0340788	1	0.954545	0.863636	Orc4	2.14097
Rbm42	0.788215	0.014169	1	0.283401	0.38453							Zkscan17	1.90012	0.00264937	1	0.109533	0.0544218	Rhoc	2.76045	0.00418442	1	0.340426	0.153153	Zfp787	1.65058	2.79999e-05	0.199079	0.437659	0.273504	Gm9733	0.721633	0.000619457	1	0.441748	0.592	Shkbp1	2.30097	0.0172752	1	0.181818	0.0779221	Trim30b	0.685199	0.0344472	1	0.431818	0.609091	Cela1	3.07041
Slc25a1	0.563424	0.0142299	1	0.0688259	0.124862							Adora2b	0.509627	0.00272104	1	0.0588235	0.113379	Cd37	0.633102	0.00422524	1	0.489362	0.72973	Smagp	1.3924	2.80739e-05	0.199577	0.694656	0.521368	Rab4b	0.683158	0.000619527	1	0.34466	0.504	Rnf180	3.31778	0.0172848	1	0.12987	0.0454545	Clec4e	0.760468	0.0344853	1	0.659091	0.854545	Rps8	1.08006
Psmd2	0.679557	0.0142811	1	0.157895	0.235359							Sort1	1.39742	0.00274143	1	0.21501	0.133787	Zdhhc18	6.35471	0.00426052	1	0.12766	0.018018	Stxbp2	1.73003	2.91416e-05	0.207138	0.399491	0.239316	Clec4a3	0.786967	0.000625715	1	0.616505	0.717333	Rrp1	1.58259	0.0173965	1	0.376623	0.246753	Dnajb1	0.352171	0.0349185	1	0.0681818	0.218182	Lat2	0.608593
Atf4	0.825216	0.0142867	1	0.441296	0.532597							Ppargc1b	1.57285	0.00275286	1	0.178499	0.108844	Nsg1	6.95889	0.00426052	1	0.12766	0.018018	C77080	2.21883	2.95045e-05	0.209689	0.277354	0.136752	Bbip1	0.576253	0.000626835	1	0.145631	0.28	Cib2	2.63447	0.0174068	1	0.142857	0.0519481	Irak4	0.334046	0.0349955	1	0.0681818	0.209091	Me2	0.374712
Cotl1	1.30599	0.0145741	1	0.384615	0.318232							Kalrn	1.36523	0.00275342	1	0.334686	0.24263	Sntb2	5.88228	0.00426052	1	0.12766	0.018018	Sfxn3	1.53921	2.95432e-05	0.209934	0.424936	0.239316	Osm	0.65937	0.000629112	1	0.213592	0.362667	Ergic3	1.4421	0.0174578	1	0.506494	0.350649	Psmb9	0.469251	0.035006	1	0.159091	0.345455	Mrps18c	0.301926
Zfp110	0.608442	0.0147182	1	0.0931174	0.158011							Slc39a9	1.62721	0.00276815	1	0.156187	0.0907029	Hdac7	3.03541	0.00432333	1	0.297872	0.117117	Rpl39	1.17981	3.01754e-05	0.214396	0.949109	0.846154	BC029722	0.497534	0.000630648	1	0.101942	0.221333	Sf3b2	1.68718	0.0176363	1	0.402597	0.25974	Nr4a1	1.39316	0.0351411	1	0.681818	0.545455	Sell	0.674416
Gm26532	0.787592	0.0147226	1	0.348178	0.434254							Ptges3	0.710429	0.00279687	1	0.263692	0.340136	Fyn	0.62684	0.004337	1	0.468085	0.72973	Hoxd3os1	2.0171	3.1705e-05	0.225232	0.29771	0.149573	Slc25a1	0.555796	0.000632489	1	0.150485	0.282667	Tmem258	1.45923	0.0176719	1	0.467532	0.324675	Erbb2ip	2.5799	0.0351575	1	0.227273	0.109091	Orai2	2.03286
Hspd1	0.758543	0.0148142	1	0.271255	0.345856							Huwe1	1.32846	0.00280077	1	0.324544	0.229025	Mbnl2	1.71761	0.00436581	1	0.553191	0.333333	Abhd3	0.428791	3.17269e-05	0.225356	0.101781	0.222222	Chst12	0.634675	0.000638092	1	0.228155	0.378667	Nampt	0.314989	0.0177884	1	0.0649351	0.181818	Gabarap	0.903934	0.0351954	1	0.931818	0.927273	Itpr1	2.81312
Cd55	0.896532	0.0151711	1	0.724696	0.79116							Celsr2	1.62373	0.00282072	1	0.198783	0.124717	Anxa2	2.00639	0.00437502	1	0.489362	0.261261	Arglu1	2.38337	3.20421e-05	0.227563	0.229008	0.0940171	Man2b2	0.560045	0.000646117	1	0.126214	0.253333	Rab3gap1	2.47129	0.0180022	1	0.181818	0.0779221	Mcl1	1.1144	0.0352107	1	0.954545	0.936364	Ctsd	0.833031
Ldha	0.795814	0.0153825	1	0.376518	0.478453							Kifap3	1.48663	0.00297263	1	0.225152	0.145125	Ssr1	0.528585	0.0043782	1	0.340426	0.603604	Cdadc1	2.09573	3.37238e-05	0.239473	0.264631	0.119658	Smdt1	0.812901	0.000648433	1	0.650485	0.749333	Mob1a	1.64007	0.0183274	1	0.350649	0.207792	Srgn	0.951758	0.0355778	1	1	1	Rpl35	1.10652
Med13	0.596259	0.0154362	1	0.11336	0.174586							Tfrc	0.78111	0.00297267	1	0.421907	0.485261	Dock6	3.46675	0.00445041	1	0.170213	0.036036	Inpp5a	2.69126	3.38798e-05	0.240546	0.198473	0.0769231	P4hb	0.772078	0.000649964	1	0.543689	0.661333	Ifi27l2a	0.763841	0.0183772	1	0.662338	0.727273	Zdhhc18	2.23617	0.0356939	1	0.204545	0.0818182	Birc6	1.69228
Upf3a	0.603415	0.0155022	1	0.0688259	0.125967							Atp1b1	0.960335	0.00302503	1	0.957404	0.979592	Dnajc13	0.30443	0.00446293	1	0.12766	0.333333	Rlim	1.84869	3.42945e-05	0.243457	0.315522	0.162393	Jak3	0.457576	0.000660521	1	0.0825243	0.192	Glrx3	0.502011	0.0189828	1	0.207792	0.350649	Cox17	1.33567	0.0358676	1	0.636364	0.563636	Arhgap10	0.270131
Naa10	0.681164	0.0155924	1	0.129555	0.2							Ap1b1	1.48014	0.00314445	1	0.231237	0.151927	H3f3a	1.12734	0.0045125	1	0.93617	0.918919	Pde4d	3.70301	3.43906e-05	0.244104	0.160305	0.0512821	Psmd10	0.424088	0.000662712	1	0.0873786	0.194667	Ube3a	2.41557	0.0189885	1	0.194805	0.0909091	Rps26	1.41394	0.0359203	1	0.590909	0.472727	Zfp326	3.02478
Rpl28	0.976556	0.0156011	1	0.97166	0.974586							Cul4b	1.88194	0.00316825	1	0.111562	0.0566893	Jund	0.740775	0.0045156	1	0.723404	0.828829	Slc7a8	1.8467	3.67799e-05	0.261027	0.284987	0.132479	Ap3s1	0.60374	0.000674427	1	0.213592	0.36	Plaa	2.87595	0.0189938	1	0.207792	0.103896	Bsdc1	3.0525	0.0361	1	0.181818	0.0727273	Il3ra	0.000648714
Zc3h12a	0.710042	0.0156075	1	0.174089	0.248619							Mrpl4	0.768115	0.00320748	1	0.395538	0.45805	H13	0.74518	0.00451818	1	0.702128	0.855856	Trio	2.73784	3.71398e-05	0.263544	0.198473	0.0769231	Erp44	0.660453	0.00067576	1	0.262136	0.424	Dpep2	1.71992	0.0189958	1	0.272727	0.142857	Plin2	0.330038	0.0370259	1	0.0909091	0.236364	Dhrs7	0.308551
Cbl	0.697976	0.0156739	1	0.117409	0.185635							Hibadh	0.841653	0.00321035	1	0.559838	0.596372	Ly6c1	2.18974	0.00453136	1	0.425532	0.207207	Dbp	1.89574	3.73736e-05	0.265166	0.3257	0.175214	Man1b1	0.453055	0.000683754	1	0.0776699	0.186667	Stx4a	1.79639	0.0192595	1	0.324675	0.201299	Ralgapa1	0.162373	0.0371174	1	0.0227273	0.136364	Ctdsp2	2.47239
Sirt7	0.739629	0.015977	1	0.210526	0.291713							Fbl	0.618592	0.00324111	1	0.119675	0.185941	Akt3	5.13058	0.0045372	1	0.12766	0.018018	Srsf5	1.34968	3.73777e-05	0.265166	0.704835	0.525641	Isy1	0.521703	0.00068659	1	0.126214	0.248	Fmnl1	1.46325	0.0192686	1	0.506494	0.37013	Prkcd	1.60381	0.0378375	1	0.5	0.354545	Abca2	2.96112
Tomm70a	0.635427	0.015991	1	0.0728745	0.132597							Aig1	1.31714	0.00325961	1	0.377282	0.278912	Hpse	0.509548	0.00454187	1	0.255319	0.531532	Ephx1	1.78351	3.76813e-05	0.267274	0.374046	0.213675	Chchd5	0.320877	0.00069018	1	0.0436893	0.133333	Slc11a1	1.42979	0.0194213	1	0.545455	0.396104	Atp6v1b2	0.557636	0.0379214	1	0.227273	0.427273	Elmo2	0.41565
Aacs	0.494804	0.0160004	1	0.0566802	0.107182							Nr4a1	1.4206	0.0032741	1	0.129817	0.0680272	Stab1	3.67146	0.00456745	1	0.170213	0.036036	Trib1	2.22075	3.81846e-05	0.270805	0.277354	0.141026	Cd86	0.634198	0.000695922	1	0.165049	0.309333	Fam129a	1.42618	0.0194809	1	0.558442	0.38961	Osm	0.679251	0.0387638	1	0.386364	0.627273	mt-Atp8	1.06137
Bsg	0.768595	0.0160547	1	0.271255	0.360221							Hnrnpdl	0.688599	0.0032804	1	0.286004	0.358277	F11r	4.03768	0.00457387	1	0.212766	0.0630631	Stard8	1.40152	3.83442e-05	0.271899	0.633588	0.457265	Cd53	0.776427	0.000701554	1	0.592233	0.706667	Klf6	1.36674	0.0196263	1	0.61039	0.512987	Reep3	1.93654	0.0387795	1	0.340909	0.209091	Uqcrh	1.21885
Ssr2	0.715509	0.0161124	1	0.137652	0.21326							Fam20b	1.42808	0.00329708	1	0.292089	0.201814	Zeb2	0.646814	0.00459216	1	0.531915	0.756757	Aldob	1.31311	3.8381e-05	0.272121	0.516539	0.290598	Trappc9	0.454017	0.000737021	1	0.0970874	0.210667	Gnai2	1.38841	0.0197033	1	0.597403	0.474026	Lyl1	3.68424	0.0389475	1	0.136364	0.0454545	Irf1	0.567166
Pef1	0.578056	0.0161198	1	0.0931174	0.151381							Cdh1	1.25027	0.00332396	1	0.525355	0.412698	Uba5	0.297102	0.00461421	1	0.106383	0.324324	Wdr13	2.35948	3.98412e-05	0.282435	0.21374	0.0854701	Mrps16	0.667453	0.000737348	1	0.262136	0.424	Nfkb2	0.29035	0.0197142	1	0.0649351	0.175325	Cmpk1	0.274314	0.0392418	1	0.0454545	0.172727	Clec2i	2.12941
Mrpl24	0.711215	0.016152	1	0.161943	0.240884							Ermp1	1.28208	0.00334477	1	0.391481	0.287982	Adam17	0.515244	0.00467301	1	0.276596	0.504505	Ubr3	1.94087	4.09212e-05	0.290049	0.284987	0.141026	Ccr2	0.731009	0.000739599	1	0.461165	0.597333	Hmgcl	1.52542	0.0197272	1	0.467532	0.324675	Tgfbr2	0.3858	0.0395257	1	0.0909091	0.245455	Cox20	0.443502
Mrps12	0.685207	0.0162182	1	0.121457	0.192265							Gpc3	1.44644	0.00334654	1	0.217039	0.138322	Pogk	4.55104	0.00468155	1	0.12766	0.018018	Setd7	2.4855	4.11691e-05	0.291765	0.175573	0.0598291	Snd1	0.58938	0.000743362	1	0.247573	0.378667	Runx1	1.66565	0.0197926	1	0.376623	0.24026	Zmym2	2.80937	0.0395866	1	0.181818	0.0727273	Nin	2.28212
Eef1e1	0.650725	0.0165047	1	0.109312	0.175691							Gpx1	0.881535	0.00336186	1	0.791075	0.802721	Hdgfrp3	3.8659	0.00468155	1	0.12766	0.018018	Ncor2	1.81385	4.15504e-05	0.294426	0.35369	0.196581	Rnf114	0.674004	0.000751284	1	0.271845	0.445333	Neurl3	1.371	0.0197973	1	0.584416	0.396104	Ube2h	0.283871	0.039885	1	0.0454545	0.172727	Brix1	0.316998
Gltscr2	0.781588	0.0168294	1	0.323887	0.40442							Dbn1	0.6261	0.00336254	1	0.223124	0.290249	Ehd2	2.76833	0.0047133	1	0.276596	0.0990991	Grb14	1.61793	4.15672e-05	0.294504	0.475827	0.299145	Rsrp1	0.849043	0.000759931	1	0.786408	0.861333	Trnt1	2.26745	0.019865	1	0.168831	0.0714286	Qdpr	2.83907	0.0403171	1	0.181818	0.0727273	Dicer1	3.59724
Rbm4b	0.582019	0.0169036	1	0.0566802	0.109392							Higd1a	0.865885	0.00341381	1	0.616633	0.643991	Klf6	0.657312	0.00471428	1	0.553191	0.756757	Dynlt1c	1.82909	4.15893e-05	0.294619	0.315522	0.162393	Tex264	0.713812	0.000764468	1	0.0825243	0.194667	Foxp1	1.87904	0.0198869	1	0.246753	0.12987	Lrrc58	4.48854	0.0406752	1	0.136364	0.0454545	Galt	0.0992305
Parp4	0.54235	0.0169084	1	0.0647773	0.118232							Pik3ip1	1.64646	0.00343458	1	0.105477	0.0521542	Tspan31	0.491955	0.00473043	1	0.255319	0.495495	Fuom	0.590147	4.18636e-05	0.29652	0.312977	0.435897	Ndufs8	0.695098	0.000789766	1	0.330097	0.504	Havcr2	1.91956	0.0199821	1	0.207792	0.0974026	Gm9843	0.441668	0.0408981	1	0.0909091	0.254545	Gm2a	2.70283
Plac8	0.715946	0.0170307	1	0.218623	0.291713							H3f3a	0.882724	0.00346663	1	0.68357	0.707483	Tcf4	0.799421	0.00474322	1	0.808511	0.855856	Kbtbd11	1.96387	4.27227e-05	0.302562	0.264631	0.123932	Gnai2	1.14993	0.000795039	1	0.825243	0.802667	Basp1	1.36807	0.0204072	1	0.649351	0.428571	Rps4x	1.66109	0.0409036	1	0.386364	0.227273	Stard4	3.02683
Atxn2l	1.31498	0.0170564	1	0.319838	0.253039							Ddah1	0.632429	0.00347385	1	0.174442	0.24263	Mndal	0.470206	0.00477289	1	0.297872	0.522523	Spc25	1.98655	4.42731e-05	0.313498	0.26972	0.123932	Cstb	0.709035	0.000814461	1	0.398058	0.541333	Pnp	0.624747	0.0204313	1	0.311688	0.480519	Il1r2	1.36096	0.0411519	1	0.681818	0.536364	Tsc22d3	1.29215
Pex19	0.50056	0.017081	1	0.0607287	0.112707							Phb	0.855003	0.00348652	1	0.592292	0.628118	Mmab	0.000723581	0.0047805	1	0	0.153153	Fxyd2	1.10603	4.57972e-05	0.324244	0.987277	0.952991	Rgs14	0.619646	0.00082067	1	0.228155	0.368	Stard5	2.53739	0.0205007	1	0.168831	0.0714286	Stk16	2.56736	0.0412694	1	0.227273	0.109091	Lcp1	0.825653
Mfsd1	0.650299	0.0173235	1	0.097166	0.160221							Kmt2d	1.68787	0.00352219	1	0.129817	0.0702948	Ckap4	4.43442	0.00478998	1	0.148936	0.027027	Kctd6	2.15156	4.62216e-05	0.327203	0.236641	0.106838	Dnajb11	0.676116	0.000853162	1	0.339806	0.501333	Ikbkb	1.92561	0.0207517	1	0.246753	0.12987	Cdc73	4.42212	0.0415632	1	0.136364	0.0454545	Med7	0.000709211
Cd83	0.916384	0.0175559	1	0.801619	0.843094							Larp1	1.46328	0.0035269	1	0.223124	0.145125	Cd69	0.591972	0.00479638	1	0.404255	0.657658	Higd1a	1.29966	4.66845e-05	0.330433	0.773537	0.581197	Vamp3	0.682797	0.000860646	1	0.271845	0.442667	Son	1.42505	0.0208214	1	0.545455	0.402597	Vdac2	0.352521	0.0415904	1	0.0909091	0.227273	Rpl27-ps3	0.000700943
Anxa6	0.808684	0.0176604	1	0.311741	0.428729							Cd82	1.35223	0.0035471	1	0.322515	0.231293	Plekhj1	0.588137	0.00480841	1	0.425532	0.63964	Cdk8	2.99792	4.71261e-05	0.333511	0.183206	0.0683761	Btg1	1.19942	0.00087379	1	0.752427	0.746667	Adrb2	1.63308	0.0209176	1	0.350649	0.214286	Dctn3	0.408316	0.0416049	1	0.136364	0.290909	Zadh2	0.000612722
Rhob	0.810002	0.0176963	1	0.404858	0.495028							Tns3	2.0791	0.00357662	1	0.125761	0.0702948	Cybb	0.659325	0.00481906	1	0.510638	0.765766	Gpx1	1.16583	4.76086e-05	0.336878	0.92112	0.824786	Hck	0.78649	0.000884603	1	0.606796	0.730667	1600020E01Rik	3.28	0.0211363	1	0.116883	0.038961	Sash3	0.387509	0.0416621	1	0.0681818	0.218182	Gtf3a	2.13052
Cox5a	0.808964	0.0177348	1	0.425101	0.517127							Amacr	0.551999	0.00358869	1	0.119675	0.181406	H2-D1	0.87227	0.00482599	1	0.93617	0.981982	Sh3bp5	1.80064	4.76244e-05	0.336943	0.335878	0.179487	Serpinb8	0.425097	0.000900305	1	0.0533981	0.146667	Snhg6	2.56022	0.021154	1	0.168831	0.0714286	Akr1c21	1.95088	0.0417196	1	0.295455	0.154545	Ms4a4b	0.781468
Mapk11	1.43436	0.0180241	1	0.214575	0.153591							Clybl	0.62916	0.00360325	1	0.21501	0.281179	Ccr9	0.621833	0.00483695	1	0.468085	0.756757	Rpl7	0.922402	4.85225e-05	0.343248	0.918575	0.888889	Akap9	0.512102	0.00090893	1	0.121359	0.242667	Sertad3	3.31811	0.0214114	1	0.116883	0.038961	Klhl24	2.34889	0.0419711	1	0.25	0.127273	Tomm22	0.640484
Sec24b	0.58695	0.0182502	1	0.0809717	0.138122							Gcat	0.678826	0.0036494	1	0.243408	0.312925	Il7r	0.512761	0.00484394	1	0.319149	0.558559	Arf6	1.9466	4.88549e-05	0.34555	0.262087	0.123932	Nelfe	0.557406	0.000925326	1	0.116505	0.242667	Polr2a	1.73403	0.0217031	1	0.285714	0.162338	Tor1a	0.250537	0.0421938	1	0.0227273	0.136364	Acin1	0.503143
Hmgcl	0.657096	0.0182816	1	0.105263	0.169061							Ndufc2	0.90913	0.0037113	1	0.776876	0.807256	Rock1	0.526338	0.00486015	1	0.234043	0.522523	Prkaca	1.91868	4.89976e-05	0.346511	0.279898	0.136752	Furin	1.74071	0.000927616	1	0.315534	0.202667	Pum1	2.10061	0.0219443	1	0.194805	0.0909091	M6pr	4.79838	0.0424674	1	0.136364	0.0454545	Os9	0.545539
Cisd1	0.626189	0.0183096	1	0.11336	0.175691							Gas6	1.16728	0.00374348	1	0.69574	0.619048	Ctss	0.660371	0.00489495	1	0.531915	0.747748	Swt1	2.1035	5.06645e-05	0.358248	0.244275	0.111111	Gpr137b	0.480572	0.00093277	1	0.0776699	0.181333	Tbxas1	1.56465	0.0219764	1	0.337662	0.201299	Ap4s1	3.39161	0.0424674	1	0.136364	0.0454545	Rasl12	2.55593
Cacul1	0.538865	0.0186311	1	0.0728745	0.125967							Cnn3	1.23093	0.00380291	1	0.598377	0.510204	Fos	0.65295	0.00493312	1	0.574468	0.837838	Thbs1	1.81657	5.20401e-05	0.367924	0.305344	0.153846	Il6ra	0.718319	0.000936428	1	0.42233	0.597333	Marcks	1.55994	0.0227243	1	0.428571	0.311688	Ptpn18	1.61444	0.0425979	1	0.409091	0.281818	Cd84	0.426012
Tcf3	0.739797	0.018753	1	0.242915	0.330387							Lsg1	1.87515	0.0038287	1	0.11359	0.0589569	Svbp	0.502011	0.00498956	1	0.255319	0.504505	Gucd1	2.12394	5.21882e-05	0.368918	0.284987	0.149573	Ube2d3	0.812323	0.000939828	1	0.679612	0.792	Itga4	2.94609	0.022834	1	0.116883	0.038961	Srpr	0.225498	0.0430481	1	0.0454545	0.163636	Nelfb	0.401134
Exoc4	0.627751	0.0187685	1	0.0769231	0.133702							Commd6	0.702248	0.00387632	1	0.259635	0.328798	Ssbp3	0.096723	0.00501979	1	0.0212766	0.189189	Tnks2	2.09567	5.2239e-05	0.369225	0.246819	0.111111	Oxct1	0.596136	0.00094589	1	0.179612	0.312	Lgals3bp	0.603731	0.0229266	1	0.25974	0.409091	Rgs14	0.459644	0.0434795	1	0.113636	0.272727	Atp11b	1.8736
Hvcn1	0.839903	0.0188609	1	0.469636	0.539227							C1qtnf4	1.39395	0.00387864	1	0.296146	0.206349	Egfl7	2.42295	0.00522395	1	0.361702	0.18018	Hsbp1l1	0.507239	5.36379e-05	0.379059	0.173028	0.303419	Dock10	0.706143	0.000946946	1	0.398058	0.562667	Zdhhc20	2.28568	0.0230068	1	0.25974	0.149351	Ldhd	0.0922468	0.043659	1	0.0227273	0.127273	Nde1	0.289731
Nolc1	0.652761	0.0191504	1	0.105263	0.167956							Abca13	1.13336	0.00388969	1	0.807302	0.743764	AI837181	3.85377	0.00527667	1	0.191489	0.0540541	Atrx	1.53356	5.42705e-05	0.383476	0.496183	0.316239	Ppp2r5a	1.57272	0.000955471	1	0.490291	0.413333	Abhd15	1.80366	0.0230669	1	0.272727	0.149351	Dbnl	0.496544	0.0438934	1	0.159091	0.327273	Tmem259	2.99911
Rassf4	1.85287	0.0191795	1	0.11336	0.0696133							Phf2	1.71953	0.00395438	1	0.156187	0.0929705	Apopt1	2.11282	0.00529825	1	0.468085	0.27027	Pygb	1.69509	5.43779e-05	0.38418	0.37659	0.209402	Syngr2	0.775149	0.000962654	1	0.553398	0.682667	Ddrgk1	1.73763	0.0231884	1	0.376623	0.253247	Sla	1.91406	0.0440445	1	0.340909	0.209091	Cmklr1	0.191412
Rcn2	1.59616	0.0192508	1	0.157895	0.107182							Per1	1.93586	0.0039754	1	0.131846	0.0748299	Srsf10	0.453233	0.0053102	1	0.212766	0.468468	AI661453	1.80773	5.47273e-05	0.386593	0.356234	0.209402	Hax1	0.621805	0.000969701	1	0.169903	0.306667	Il21r	1.85472	0.0232906	1	0.298701	0.175325	Gpr137b-ps	0.447778	0.044116	1	0.0909091	0.245455	Zmat5	0.403758
Ass1	1.19162	0.0192602	1	0.388664	0.303867							Sod1	1.34083	0.00402937	1	0.395538	0.29932	Unc93b1	0.764244	0.00532852	1	0.680851	0.792793	Id2	1.28211	5.58294e-05	0.394323	0.798982	0.636752	Mxd1	0.601371	0.00098032	1	0.150485	0.28	Rtn4	1.40033	0.0238781	1	0.571429	0.448052	Smim10l1	3.05027	0.044326	1	0.136364	0.0454545	Ugcg	0.575292
Gimap1	0.830162	0.0195935	1	0.469636	0.567956							S100a1	0.962149	0.00413522	1	0.918864	0.9161	Ctsl	0.742771	0.00533856	1	0.723404	0.891892	Tprn	1.79114	5.69315e-05	0.40205	0.328244	0.175214	Trim30b	0.406979	0.000992945	1	0.0339806	0.117333	Vps36	1.91242	0.0239036	1	0.194805	0.0909091	Sfxn1	3.58687	0.044326	1	0.136364	0.0454545	Dnajc14	0.296336
Map2k2	0.79764	0.0199981	1	0.352227	0.438674							Gm10076	1.0231	0.00419048	1	0.892495	0.907029	Amica1	0.559201	0.00535034	1	0.361702	0.594595	Trpt1	2.23259	5.70197e-05	0.402616	0.21883	0.0897436	Fam96b	0.628187	0.000992978	1	0.257282	0.4	Emp3	1.3924	0.0241746	1	0.532468	0.376623	Nfe2	0.635794	0.0443732	1	0.295455	0.509091	Emid1	3.21565
Ing5	0.596854	0.0201132	1	0.0607287	0.113812							Fam195a	0.750277	0.00422291	1	0.407708	0.46712	Sdc4	0.567251	0.0053649	1	0.340426	0.621622	4930426D05Rik	1.91214	5.81057e-05	0.410226	0.287532	0.149573	Psma3	0.775555	0.00101291	1	0.553398	0.677333	Inmt	0.326362	0.0241991	1	0.038961	0.136364	Arfgef1	0.071537	0.0444761	1	0.0227273	0.127273	Phf23	0.13828
Txndc12	0.512187	0.0203147	1	0.0647773	0.114917							Shroom4	1.95425	0.00431889	1	0.111562	0.0589569	P2ry14	0.625366	0.00539438	1	0.382979	0.693694	Colgalt2	2.08101	5.86089e-05	0.413721	0.267176	0.132479	Uba5	0.51445	0.00101482	1	0.092233	0.2	Arl16	3.90784	0.0242059	1	0.103896	0.0324675	Stat1	0.320735	0.0445488	1	0.0681818	0.2	Syngr2	0.551104
Rsrp1	0.842336	0.0203565	1	0.530364	0.620994							Oxld1	0.658994	0.00432642	1	0.188641	0.260771	Ccl4	0.62489	0.00543502	1	0.489362	0.738739	Zfp800	3.45624	5.97898e-05	0.421996	0.145038	0.042735	Cd68	0.816644	0.00102062	1	0.665049	0.749333	Scarb1	2.20746	0.0243544	1	0.220779	0.116883	Rdh12	1.95804	0.044604	1	0.318182	0.181818	Gatad2a	0.563757
4930523C07Rik	0.830629	0.0204235	1	0.453441	0.561326							Cpsf7	1.76834	0.00434261	1	0.123732	0.0680272	Rab12	5.10128	0.00552557	1	0.191489	0.0540541	Klhl21	2.1231	6.00538e-05	0.423799	0.226463	0.0940171	Rab2a	1.72788	0.00102343	1	0.354369	0.253333	Slc2a3	3.62132	0.0245369	1	0.103896	0.0324675	Ppia	1.46844	0.0449664	1	0.522727	0.372727	Cdc34	0.190147
Arih2	1.4243	0.020552	1	0.226721	0.166851							Acsm2	0.614616	0.00439842	1	0.176471	0.244898	Tspan4	2.73947	0.00566522	1	0.297872	0.117117	Scnn1a	1.35505	6.11784e-05	0.431675	0.684478	0.521368	Emc4	0.582468	0.00104209	1	0.145631	0.274667	Sft2d1	1.42018	0.0246917	1	0.493506	0.37013	Xbp1	0.522535	0.045507	1	0.159091	0.327273	Plcg2	0.307653
Psmd12	0.676908	0.0205639	1	0.133603	0.20221							Gclm	0.658688	0.00442004	1	0.235294	0.297052	Fam69a	0.529574	0.00567643	1	0.276596	0.531532	Chmp4b	1.52232	6.19761e-05	0.437241	0.483461	0.316239	Ndufc2	0.744751	0.0010428	1	0.470874	0.605333	Rsu1	1.53046	0.0248352	1	0.415584	0.266234	Rassf5	0.556975	0.0460847	1	0.204545	0.409091	Telo2	2.5337
Ddx3y	0.659017	0.0209367	1	0.133603	0.2							Bag1	1.18888	0.00445762	1	0.651116	0.564626	Ezr	0.584953	0.00568523	1	0.382979	0.684685	Xpo1	1.9681	6.25896e-05	0.441507	0.254453	0.115385	Ranbp1	0.676797	0.00104917	1	0.305825	0.464	Tspyl2	3.60521	0.0248719	1	0.103896	0.0324675	Stat6	1.78104	0.0461751	1	0.386364	0.254545	Zfp639	4.01887
Slc3a2	0.762938	0.0209503	1	0.226721	0.312707							Nr3c1	0.531306	0.00450888	1	0.0689655	0.122449	Zc3h12c	0.212485	0.00569378	1	0.0638298	0.252252	Jarid2	2.02528	6.31684e-05	0.445527	0.277354	0.141026	Tmed2	0.811728	0.00108922	1	0.631068	0.730667	Cc2d1b	3.32275	0.0248719	1	0.103896	0.0324675	Atxn10	0.33845	0.0465153	1	0.0909091	0.227273	Arpc3	0.801741
Atad3a	0.610326	0.0210504	1	0.0728745	0.128177							Map7d1	1.90012	0.00452906	1	0.105477	0.0544218	Trim47	3.86831	0.00580274	1	0.234043	0.0810811	Irx2	2.00519	6.33537e-05	0.44677	0.307888	0.166667	Mgst1	1.43882	0.00108944	1	0.509709	0.402667	Madd	2.67418	0.0249631	1	0.116883	0.038961	Hist2h2aa1	2.34999	0.0465837	1	0.181818	0.0727273	Fmo1	3.91907
Etfb	1.54995	0.0210912	1	0.194332	0.142541							Zbtb7b	1.731	0.00453881	1	0.148073	0.0884354	Cd28	0.237777	0.00588146	1	0.0851064	0.27027	Slc38a10	1.61678	6.36498e-05	0.448795	0.455471	0.294872	Bax	0.755517	0.0010923	1	0.524272	0.653333	Stk24	2.25531	0.0250164	1	0.155844	0.0649351	Prdx1	1.78991	0.0466232	1	0.340909	0.190909	Rpl13a	1.06381
Prpf4b	0.686451	0.0211115	1	0.1417	0.209945							Suds3	1.41126	0.00457456	1	0.257606	0.179138	Dnajc7	0.706123	0.00593724	1	0.659574	0.774775	Klk1b3	5.67559	6.37265e-05	0.449272	0.101781	0.017094	Galk2	0.483828	0.00109287	1	0.0970874	0.205333	Csf1r	1.19176	0.0251509	1	0.818182	0.720779	Selplg	0.844613	0.0468872	1	0.818182	0.909091	Dlg1	2.99207
1110008P14Rik	0.74619	0.0211131	1	0.182186	0.258564							Pde3b	1.89668	0.00459666	1	0.115619	0.0612245	Selk	0.790654	0.00594259	1	0.787234	0.873874	Prps2	1.46168	6.53014e-05	0.46031	0.513995	0.337607	P2rx4	0.659299	0.00110401	1	0.18932	0.325333	Parp1	1.69175	0.0251524	1	0.25974	0.136364	Stat5b	2.13102	0.0472588	1	0.25	0.127273	Zfp654	2.97703
Lsp1	0.900164	0.0211178	1	0.736842	0.794475							Ldhd	0.481415	0.00460161	1	0.11359	0.170068	Ptpn1	0.630547	0.00609691	1	0.446809	0.711712	Hint2	1.30651	6.61403e-05	0.466157	0.778626	0.602564	Pilrb2	0.695369	0.00111611	1	0.237864	0.394667	Zc3h4	3.58373	0.0252108	1	0.103896	0.0324675	Cdc40	0.222583	0.0474611	1	0.0454545	0.163636	Traf5	0.000713911
Cct2	0.822625	0.0212833	1	0.384615	0.483978							Pmpcb	0.772009	0.00462888	1	0.336714	0.410431	Sppl3	4.30565	0.00619481	1	0.191489	0.0540541	Sfrp1	1.35642	6.66428e-05	0.469632	0.651399	0.423077	Timm17b	0.611422	0.00112582	1	0.165049	0.296	Nup153	4.07451	0.0252108	1	0.103896	0.0324675	Hnrnpu	2.47354	0.0479535	1	0.204545	0.0909091	Otud6b	0.000698511
Ctsc	0.778199	0.0215214	1	0.303644	0.38895							Fam234a	1.23368	0.00472063	1	0.464503	0.353741	Laptm5	0.686261	0.00625827	1	0.553191	0.747748	Trpm7	1.98639	6.67107e-05	0.470044	0.236641	0.106838	Asah1	0.743696	0.00112699	1	0.475728	0.6	Klf2	1.41386	0.025262	1	0.558442	0.402597	Eif1a	2.28777	0.0479535	1	0.204545	0.0909091	Rab35	0.000732335
Ywhaq	0.810075	0.021551	1	0.356275	0.456354							Ephx2	0.544998	0.00480702	1	0.0993915	0.156463	Hbp1	1.97343	0.00626607	1	0.446809	0.243243	Gem	2.76867	6.67276e-05	0.470096	0.165394	0.0555556	Ola1	0.642411	0.00112764	1	0.194175	0.341333	Rnf170	2.64541	0.0252809	1	0.116883	0.038961	Iqgap1	1.18124	0.0481914	1	0.863636	0.8	Lysmd3	0.000707586
Ssna1	0.694856	0.0218415	1	0.145749	0.21547							Zfp638	1.51785	0.00481571	1	0.146045	0.0839002	Esam	2.6589	0.0062998	1	0.297872	0.117117	Dtnbp1	1.70484	6.78299e-05	0.477794	0.37659	0.217949	Brox	0.520438	0.00113028	1	0.0970874	0.205333	Otub1	1.60875	0.0253732	1	0.311688	0.175325	Aagab	2.90656	0.0482495	1	0.136364	0.0454545	Edf1	0.718577
Akr7a5	0.697803	0.0218595	1	0.17004	0.237569							Agrn	1.82192	0.00482494	1	0.117647	0.0634921	Card11	0.603499	0.00630663	1	0.446809	0.666667	Zranb1	2.17212	6.80364e-05	0.47918	0.229008	0.102564	Ggct	0.539995	0.00113354	1	0.0873786	0.194667	Slco2b1	1.45143	0.0254076	1	0.467532	0.292208	Anp32b	3.76642	0.0485063	1	0.159091	0.0636364	Alad	2.06118
Vpreb3	0.773099	0.0218757	1	0.327935	0.40221							Mrpl51	0.808149	0.00490215	1	0.482759	0.53288	Mtm1	0.000847163	0.00637078	1	0	0.144144	Efhd2	4.02645	6.82622e-05	0.480703	0.109415	0.0213675	Tnfrsf21	0.680872	0.00113755	1	0.315534	0.472	Glul	1.39679	0.025434	1	0.506494	0.383117	Cyp2j5	2.88769	0.0494274	1	0.159091	0.0636364	Abhd17a	3.86374
Micu2	0.681291	0.0219071	1	0.137652	0.20442							Bahd1	1.93235	0.00494719	1	0.119675	0.0657596	S1pr1	3.53765	0.0064145	1	0.234043	0.0810811	Ldb1	1.95969	6.93002e-05	0.487943	0.272265	0.136752	l7Rn6	0.528427	0.00115403	1	0.145631	0.261333	Lilrb4a	1.34459	0.0254867	1	0.662338	0.467532	Rfc2	0.191522	0.0496541	1	0.0227273	0.127273	Stat1	0.386767
Manbal	0.616263	0.0219451	1	0.0566802	0.107182							Deaf1	1.89855	0.004987	1	0.11359	0.0612245	Ube2e3	2.59469	0.0064357	1	0.361702	0.189189	Cdkn1a	6.39612	6.95927e-05	0.489933	0.114504	0.025641	Glrx	0.580962	0.00115862	1	0.199029	0.330667	Slc35e4	3.28472	0.0255537	1	0.103896	0.0324675	Txndc9	0.233573	0.0498066	1	0.0454545	0.163636	Ccnd2	0.716222
Rtca	0.530595	0.0219728	1	0.0566802	0.104972							Smu1	0.59095	0.00498758	1	0.119675	0.181406	Ly6c2	0.650987	0.00650643	1	0.510638	0.756757	Scaf8	2.66057	6.97802e-05	0.491183	0.193384	0.0769231	Ncstn	0.686248	0.00116494	1	0.257282	0.416	Tuba1a	1.68733	0.0255624	1	0.311688	0.175325	Gm5483	2.05517	0.04981	1	0.295455	0.163636	Rpl22	1.09226
Trmt10c	0.647762	0.0222173	1	0.0688259	0.124862							Slc35b1	1.4758	0.00502452	1	0.263692	0.185941	Trpv2	0.388369	0.00652746	1	0.148936	0.387387	Atp6v1e1	1.1725	7.22757e-05	0.508676	0.903308	0.816239	Tsn	0.68481	0.00116767	1	0.252427	0.405333	Mydgf	1.95479	0.0256619	1	0.25974	0.142857	Clec4d	1.16691	0.0498804	1	0.75	0.736364	Fgfr1op2	0.546578
Hiat1	0.670088	0.0222878	1	0.133603	0.2							Dnajc12	0.618012	0.00510193	1	0.139959	0.204082	Helz	2.47774	0.00661969	1	0.212766	0.0630631	Tmem176a	0.805986	7.23426e-05	0.509075	0.694656	0.730769	Cirbp	1.50408	0.00117224	1	0.470874	0.378667	Commd2	2.10466	0.0256883	1	0.207792	0.103896							Cdc42	0.865119
Drg1	0.692836	0.0222921	1	0.11336	0.177901							Gm13111	1.6041	0.00513365	1	0.150101	0.0884354	Jam2	3.85767	0.00663057	1	0.191489	0.0540541	Copz2	1.83565	7.26182e-05	0.510942	0.29771	0.153846	Psmc4	0.690472	0.00117665	1	0.252427	0.416	Inpp4b	3.6238	0.0259006	1	0.103896	0.0324675							Ndufc2	1.54657
Idh3a	0.6669	0.0224361	1	0.121457	0.185635							Bptf	1.65166	0.00516094	1	0.184584	0.117914	Lgals1	0.725126	0.00667073	1	0.680851	0.837838	Ablim1	1.56153	7.30753e-05	0.514085	0.422392	0.25641	Plek	0.744163	0.00118557	1	0.504854	0.656	Nlrc4	3.5769	0.0259006	1	0.103896	0.0324675							Pdzk1	1.94319
Psmb9	0.761586	0.0224786	1	0.226721	0.302762							Meaf6	0.511947	0.00523159	1	0.0933063	0.14966	Cd300c	0.618626	0.00669296	1	0.425532	0.675676	Pnrc1	1.52708	7.37955e-05	0.519078	0.503817	0.333333	Ap3b1	0.728286	0.00118833	1	0.237864	0.389333	Pira2	2.2378	0.025927	1	0.116883	0.038961							Ubash3a	3.81086
Cops6	0.761604	0.0225832	1	0.214575	0.293923							Tm9sf3	1.40157	0.00524031	1	0.26572	0.185941	Sirt7	0.499176	0.0069086	1	0.212766	0.468468	Rabl6	1.90467	7.38354e-05	0.519284	0.318066	0.175214	2210016F16Rik	0.63043	0.00120844	1	0.18932	0.322667	Lmbr1l	2.45016	0.0260983	1	0.155844	0.0649351							Snrk	2.02929
Ddb1	0.687435	0.022747	1	0.129555	0.194475							Dst	1.19986	0.00527896	1	0.626775	0.512472	Cox8a	0.824815	0.00691702	1	0.87234	0.963964	Igfbp4	1.59949	7.68974e-05	0.540743	0.381679	0.213675	Ctsz	0.843178	0.00121577	1	0.718447	0.797333	D2Wsu81e	3.13226	0.0262516	1	0.103896	0.0324675							Styk1	0.362937
Fam136a	0.640251	0.0230825	1	0.0890688	0.148066							Uqcrb	0.976929	0.00529861	1	0.906694	0.893424	Ncoa1	3.15625	0.00694504	1	0.234043	0.0810811	Polr3e	3.00523	7.72791e-05	0.543349	0.175573	0.0641026	Top3b	0.369057	0.00122043	1	0.0485437	0.136	Pi4k2a	2.96762	0.0262516	1	0.103896	0.0324675							Sgta	2.08901
Elp5	0.583957	0.02324	1	0.0607287	0.110497							Atrn	2.04049	0.00535264	1	0.115619	0.0634921	Dusp1	1.45355	0.00704413	1	0.787234	0.612613	Rexo4	2.55036	7.84686e-05	0.551634	0.180662	0.0683761	Npm1	0.826183	0.00123348	1	0.631068	0.733333	Irf7	0.556323	0.0263012	1	0.207792	0.344156							Zbtb20	1.6848
Crtc3	0.524632	0.0233314	1	0.0607287	0.109392							Hnrnpa0	1.29797	0.00535646	1	0.373225	0.283447	Nsmce1	0.505098	0.00716879	1	0.148936	0.396396	Pqlc1	0.403441	8.20296e-05	0.576586	0.114504	0.226496	H2-T24	0.401219	0.0012401	1	0.0533981	0.141333	Nit1	2.0448	0.0265029	1	0.194805	0.0909091							Pspc1	0.145054
Atp6v0d1	0.765477	0.0233384	1	0.275304	0.353591							Hotairm1	1.35422	0.00539054	1	0.332657	0.251701	Gas6	2.68098	0.00717387	1	0.297872	0.126126	Slc29a1	1.87703	8.2259e-05	0.578117	0.315522	0.17094	Socs3	0.7097	0.00124676	1	0.378641	0.517333	Susd3	1.50115	0.0266308	1	0.415584	0.279221							Pan2	3.31176
Rnf181	0.770019	0.0233629	1	0.242915	0.329282							Chrna4	1.81106	0.00540261	1	0.135903	0.0793651	Adpgk	0.511193	0.0071918	1	0.276596	0.522523	Cgnl1	1.29224	8.29074e-05	0.58259	0.760814	0.581197	Rars2	0.244047	0.00125386	1	0.0291262	0.104	Vezf1	2.58479	0.02676	1	0.194805	0.0974026							Galns	3.88651
Gk	0.525362	0.023449	1	0.0566802	0.103867							Sostdc1	0.863938	0.00542539	1	0.653144	0.702948	Ifitm2	1.89417	0.00720944	1	0.489362	0.297297	Epm2aip1	2.17915	8.35619e-05	0.587106	0.203562	0.0811966	Sf1	0.764666	0.00125692	1	0.495146	0.650667	Tspan31	1.58989	0.0267708	1	0.363636	0.24026							Capza1	0.693599
Bambi	0.58505	0.0234788	1	0.0566802	0.106077							Diaph1	1.43568	0.00568173	1	0.208925	0.136054	Ngdn	0.420468	0.00728701	1	0.170213	0.414414	Ppp1r2	1.47355	8.3628e-05	0.587487	0.516539	0.320513	Rassf3	1.78706	0.00128661	1	0.320388	0.221333	Rnf13	1.46025	0.0268604	1	0.532468	0.402597							Pctp	2.81513
Lta4h	0.549755	0.0235952	1	0.0607287	0.110497							St3gal6	0.625479	0.00574602	1	0.148073	0.210884	Pld4	0.678198	0.00730923	1	0.553191	0.774775	Tacstd2	1.55259	8.37554e-05	0.588298	0.442748	0.273504	Pla2g4a	0.445644	0.00128886	1	0.0631068	0.154667	Top1	0.582681	0.0268947	1	0.233766	0.38961							Fopnl	2.37168
Arhgap4	0.790578	0.0236955	1	0.299595	0.394475							Acot13	0.814317	0.00588726	1	0.496957	0.553288	Slc41a2	0.459654	0.00732766	1	0.191489	0.432432	Ostf1	1.31327	8.40109e-05	0.590008	0.712468	0.542735	Cd81	0.478292	0.00129696	1	0.0970874	0.2	Smad1	2.27643	0.0269229	1	0.116883	0.038961							Blcap	2.4624
Phpt1	0.575115	0.0237806	1	0.0647773	0.114917							Efhd1	0.84379	0.00591421	1	0.535497	0.566893	Fam101b	3.31307	0.00736847	1	0.234043	0.0810811	Pik3r3	7.06566	8.4083e-05	0.590431	0.111959	0.025641	Snrpd1	0.685367	0.00130279	1	0.320388	0.48	Prkch	2.44897	0.0272204	1	0.155844	0.0649351							Spn	0.709262
Fuca1	0.788149	0.0240652	1	0.214575	0.306077							Nckap1	1.3919	0.0059753	1	0.275862	0.192744	Tmem204	2.34737	0.00737199	1	0.297872	0.117117	Tmem176b	0.849814	8.45326e-05	0.593503	0.791349	0.799145	N4bp2l2	0.501047	0.00130365	1	0.135922	0.253333	Smn1	2.17246	0.0273402	1	0.168831	0.0714286							S100pbp	3.33447
Prr14l	0.617919	0.0245445	1	0.0769231	0.130387							Ctdsp2	1.4285	0.0060256	1	0.296146	0.222222	Sorbs3	5.05878	0.00749979	1	0.170213	0.045045	Ccdc28b	1.57695	8.52114e-05	0.598184	0.386768	0.222222	Saraf	0.580688	0.00131351	1	0.242718	0.373333	Adsl	0.382723	0.0273634	1	0.0779221	0.188312							PISD	1.4559
Sla	1.30797	0.0245967	1	0.319838	0.259669							Acad11	1.36729	0.00604237	1	0.267748	0.190476	Rplp1	0.940967	0.00753964	1	0.978723	0.954955	Rmdn1	1.58239	8.5585e-05	0.600721	0.452926	0.290598	Ccl6	1.16577	0.00134394	1	0.771845	0.762667	Timp3	0.278834	0.0274603	1	0.0519481	0.149351							Tmem19	0.19284
Brwd1	0.735513	0.0246521	1	0.186235	0.257459							Stx18	0.609309	0.00606408	1	0.0689655	0.122449	Idi1	0.661175	0.0076229	1	0.319149	0.585586	Ddx3x	1.5418	8.85539e-05	0.621471	0.51145	0.333333	Nck1	0.523636	0.0013458	1	0.101942	0.210667	Dr1	1.76559	0.0274645	1	0.298701	0.175325							Aoah	0.321096
Med4	0.627653	0.0246548	1	0.0769231	0.130387							Chchd7	0.815799	0.00609981	1	0.484787	0.53288	mt-Nd4l	0.920514	0.0076271	1	0.978723	1	Cdv3	2.11753	9.22649e-05	0.647423	0.249364	0.119658	Os9	0.695058	0.00135216	1	0.296117	0.448	Sertad2	2.37384	0.027683	1	0.168831	0.0779221							Sars	0.586179
Hspe1	0.830177	0.0246925	1	0.461538	0.553591							Dyrk1a	1.81206	0.00618188	1	0.103448	0.0544218	Ehd3	2.63398	0.00771323	1	0.276596	0.108108	Itgav	1.71698	9.23205e-05	0.647721	0.407125	0.25641	Cdkn1a	0.810357	0.00135765	1	0.616505	0.72	Tmem106b	3.09083	0.0276969	1	0.103896	0.0324675							Raph1	0.000677365
Ensa	1.4504	0.0248247	1	0.234818	0.18011							Mrpl19	0.541651	0.00619276	1	0.107505	0.163265	Ddx56	0.273292	0.00772454	1	0.0851064	0.288288	Coa5	1.57976	9.25355e-05	0.649137	0.389313	0.226496	Mrpl42	0.666388	0.00136006	1	0.228155	0.362667	Ict1	2.64451	0.0277573	1	0.194805	0.0974026							Atg7	0.000660074
Commd6	0.655469	0.0248587	1	0.11336	0.173481							Slc44a1	1.7416	0.00620366	1	0.137931	0.0816327	Tubgcp5	0.469153	0.00772762	1	0.212766	0.459459	Gon4l	1.9741	9.27162e-05	0.650311	0.256997	0.123932	Wdr1	0.807121	0.00136008	1	0.61165	0.744	Lin7c	2.22824	0.0277969	1	0.155844	0.0649351							Snapc2	0.000788842
Nudt8	0.565382	0.0249715	1	0.0850202	0.138122							Pdcd4	1.60308	0.00624574	1	0.137931	0.0816327	Rpl6	0.874145	0.00779767	1	0.893617	0.972973	Sptan1	1.42579	9.30592e-05	0.652624	0.597964	0.431624	Ifi35	0.647222	0.00136508	1	0.252427	0.392	Wdr91	2.81682	0.0278921	1	0.155844	0.0714286							Asah1	0.000779456
Hnrnpm	0.780184	0.0249817	1	0.275304	0.359116							Tomm5	0.783267	0.00627514	1	0.389452	0.453515	Exoc3l2	2.74131	0.0078414	1	0.212766	0.0630631	Map7	1.57201	9.65828e-05	0.677238	0.43257	0.264957	Usp8	0.665016	0.00136671	1	0.257282	0.405333	Tollip	0.221071	0.0280353	1	0.038961	0.12987							Rps26-ps1	0.000721689
Prelid1	0.80082	0.0250092	1	0.311741	0.412155							Pygb	1.28838	0.00628422	1	0.296146	0.208617	Sf1	0.645231	0.00790789	1	0.510638	0.72973	Tef	1.99522	9.7025e-05	0.680242	0.287532	0.153846	Gyg	0.707232	0.00137088	1	0.368932	0.514667	Scap	0.202247	0.0280856	1	0.025974	0.11039							Klra1	0.000461456
Polr1d	1.16378	0.025016	1	0.554656	0.511602							Scamp1	1.70395	0.00635853	1	0.133874	0.0770975	2010111I01Rik	3.19771	0.00795481	1	0.255319	0.0990991	Ush1c	1.79171	9.74968e-05	0.683452	0.3257	0.175214	Mrpl9	0.568464	0.00137686	1	0.160194	0.285333	Nelfe	0.323699	0.0282005	1	0.0649351	0.168831							Sorl1	2.07295
Eif6	0.778017	0.0251777	1	0.194332	0.279558							Rabgef1	1.4782	0.00642491	1	0.184584	0.117914	Cadm1	0.111561	0.0080595	1	0.0212766	0.18018	Ranbp9	4.01301	9.87574e-05	0.69219	0.150127	0.0512821	Bclaf1	0.723955	0.00139499	1	0.247573	0.402667	Gpr146	2.24971	0.0282583	1	0.181818	0.0844156							Plekhj1	1.4297
Blk	0.860275	0.0252296	1	0.57085	0.655249							Tmem53	1.56779	0.00643339	1	0.190669	0.126984	Glipr1	0.312707	0.00808867	1	0.0851064	0.288288	Pde4c	1.45309	9.88049e-05	0.692425	0.562341	0.380342	Tbrg1	0.463058	0.00140097	1	0.0825243	0.184	Ing4	2.11402	0.02832	1	0.168831	0.0714286							Rpl37a	1.04389
Commd8	0.655051	0.0254838	1	0.0890688	0.145856							Tradd	0.593287	0.00645456	1	0.0588235	0.108844	Bvht	3.15362	0.00810797	1	0.191489	0.0540541	Adcy6	1.58687	9.99333e-05	0.700233	0.384224	0.222222	Psmc2	0.659875	0.00140627	1	0.296117	0.432	Fam96a	1.52439	0.0283948	1	0.402597	0.253247							Nbeal1	2.79658
Scaf8	0.609072	0.0255661	1	0.0931174	0.148066							Smo	1.65155	0.00646381	1	0.121704	0.0680272	Npdc1	2.34578	0.0081557	1	0.319149	0.135135	Atxn7l3b	1.38428	0.000101438	0.710673	0.694656	0.491453	Grn	0.803449	0.00141216	1	0.621359	0.693333	Crlf3	1.54058	0.0285289	1	0.415584	0.272727							Rbbp7	0.555593
Snrpd1	0.743547	0.0255787	1	0.198381	0.276243							Plxnb1	1.40249	0.0065125	1	0.204868	0.133787	Ak3	2.21237	0.00817105	1	0.446809	0.279279	Pdxk	1.66553	0.00010197	0.714297	0.366412	0.217949	Chil3	1.58228	0.00141512	1	0.441748	0.346667	Sipa1	1.51984	0.0286136	1	0.415584	0.285714							Klra8	0.310334
Ubxn1	0.82283	0.0258722	1	0.408907	0.495028							Zer1	1.80502	0.00654347	1	0.117647	0.0657596	Aak1	2.8868	0.00819051	1	0.212766	0.0720721	Zmiz2	1.70026	0.00010362	0.725756	0.29771	0.149573	Rtn1	0.355382	0.00141944	1	0.0291262	0.104	Mob3b	2.19418	0.0286561	1	0.116883	0.038961							Ctnna1	0.200142
Otub1	0.692074	0.0259049	1	0.11336	0.177901							Mrps34	0.77073	0.0065599	1	0.385396	0.439909	Mtus1	4.29413	0.00819051	1	0.212766	0.0720721	1700011H14Rik	1.22953	0.000103953	0.727985	0.885496	0.747863	Vav3	2.1366	0.00142637	1	0.203883	0.112	Msrb2	2.52469	0.0288255	1	0.103896	0.0324675							Cfl1	0.940942
Anapc2	0.619485	0.0259232	1	0.105263	0.160221							Arhgef18	1.40931	0.00664159	1	0.243408	0.1678	Haao	0.28996	0.00821342	1	0.0851064	0.288288	Usp9x	1.72353	0.000104807	0.733858	0.399491	0.269231	Arsa	0.502016	0.00143208	1	0.092233	0.197333	Dda1	1.89748	0.0289094	1	0.272727	0.162338							Arl15	2.11709
Usp22	0.619725	0.0261456	1	0.0607287	0.110497							Gm15417	1.75729	0.00677938	1	0.139959	0.0839002	Elovl6	0.120789	0.00821458	1	0.0212766	0.18018	Avpi1	1.60536	0.000105912	0.741493	0.384224	0.230769	Phf11d	0.359464	0.00144058	1	0.038835	0.12	Lgals3	0.642835	0.0289284	1	0.376623	0.5							Man2c1	2.78533
Scyl3	1.85046	0.0261607	1	0.101215	0.0618785							Mdh2	0.923085	0.00680102	1	0.805274	0.829932	Scrn1	0.117605	0.00821458	1	0.0212766	0.18018	Mdh2	0.909579	0.000106468	0.745279	0.895674	0.888889	Igtp	0.352964	0.0014415	1	0.0291262	0.104	Il1b	1.3685	0.0289328	1	0.61039	0.467532							Rpl9	1.15153
Rbm10	0.629292	0.0262825	1	0.0769231	0.130387							Slc31a1	0.674081	0.00681045	1	0.206897	0.274376	Ctsb	0.826252	0.00842172	1	0.829787	0.891892	Jmy	2.82766	0.000107016	0.749008	0.155216	0.0512821	mt-Co3	1.05795	0.00144483	1	0.995146	1	Slc15a4	1.81427	0.028965	1	0.285714	0.168831							Acp5	1.67249
Lnpep	1.58888	0.0263693	1	0.174089	0.124862							Ifi30	0.784241	0.00686149	1	0.440162	0.489796	Mapk8ip3	0.337926	0.00843591	1	0.106383	0.315315	2022-09-04	1.81561	0.000107426	0.751769	0.290076	0.149573	Slc25a45	0.662005	0.00145398	1	0.184466	0.325333	Tprgl	2.70222	0.0290393	1	0.181818	0.0909091							Slk	2.6683
Ogdh	0.765171	0.0264884	1	0.242915	0.328177							mt-Nd4l	0.97266	0.00687215	1	0.983773	0.995465	Bcar1	4.14948	0.0084413	1	0.170213	0.045045	Zfp87	2.01382	0.0001077	0.75358	0.24173	0.111111	Ddx1	0.449367	0.00148437	1	0.0679612	0.162667	Stom	0.224312	0.0290404	1	0.025974	0.11039							Snrpg	1.2969
Kat6a	0.630215	0.0264957	1	0.0931174	0.150276							Trmt1	0.624794	0.00704795	1	0.0750507	0.129252	Bcam	2.30808	0.00845954	1	0.297872	0.117117	Pkdcc	3.6443	0.000107933	0.755099	0.127226	0.034188	Fam234b	0.325101	0.00148657	1	0.0291262	0.104	Jun	1.30937	0.0290449	1	0.701299	0.545455							Wbp5	0.320813
Ogt	0.648735	0.0265277	1	0.125506	0.18453							Ext1	1.54504	0.00714999	1	0.135903	0.0793651	Rad54l2	0.000829912	0.00847384	1	0	0.135135	Tspan4	2.05818	0.000108423	0.758422	0.264631	0.132479	Usp33	0.4248	0.0014991	1	0.0631068	0.154667	Tiparp	2.28531	0.0292236	1	0.233766	0.12987							Klra7	0.363103
Rps27rt	0.865325	0.0265935	1	0.578947	0.671823							Chp1	0.778145	0.00715894	1	0.393509	0.453515	Dstn	2.44598	0.00850421	1	0.425532	0.261261	Nhsl1	4.23292	0.000108616	0.759661	0.132316	0.0384615	Lmbrd1	0.587375	0.00150946	1	0.194175	0.322667	1810037I17Rik	0.516628	0.0292686	1	0.233766	0.363636							Ostf1	0.781634
Wnk1	0.655879	0.0266484	1	0.117409	0.174586							Neurl1b	1.5399	0.00717212	1	0.11359	0.0612245	Slc25a11	0.618098	0.00857949	1	0.297872	0.54955	Hectd1	1.40159	0.000111843	0.782117	0.557252	0.367521	Zfand3	0.678283	0.00151288	1	0.252427	0.386667	Vsir	1.34444	0.0293424	1	0.623377	0.461039							Ldhb	2.10172
Fus	0.841199	0.0266963	1	0.445344	0.519337							Tbc1d14	1.2442	0.00717381	1	0.381339	0.285714	Numb	2.62324	0.00861304	1	0.234043	0.0810811	Csrnp1	2.09856	0.000112431	0.786121	0.251908	0.123932	Phf23	0.614207	0.0015457	1	0.150485	0.277333	Mif	1.29946	0.0293652	1	0.519481	0.337662							Tmem126a	0.319544
Ddx42	0.706328	0.0266965	1	0.129555	0.19558							Taldo1	0.828604	0.00720041	1	0.517241	0.564626	Tek	3.45251	0.00870494	1	0.212766	0.0720721	Sulf2	2.20065	0.000113833	0.795807	0.254453	0.128205	Ptgs2	0.468611	0.0015473	1	0.092233	0.192	Eif3i	1.49356	0.0293802	1	0.532468	0.38961							Git2	1.64598
Ubqln1	0.715022	0.026726	1	0.133603	0.20442							Mrpl12	0.872352	0.00722282	1	0.618661	0.637188	Klf3	2.18246	0.00874011	1	0.404255	0.234234	Gna11	1.88034	0.000114591	0.80099	0.330789	0.192308	Apobec1	0.74131	0.00155046	1	0.451456	0.589333	Zdhhc12	2.64951	0.0294534	1	0.142857	0.0584416							Eif1	0.962119
Slc25a11	0.746704	0.0267356	1	0.214575	0.290608							Lmo7	1.57375	0.00726146	1	0.204868	0.14059	Urod	0.2515	0.00874087	1	0.0851064	0.27027	Ccser2	1.66978	0.000114904	0.803066	0.35369	0.205128	Rap1gap2	1.63597	0.00155391	1	0.378641	0.28	Plxnd1	1.91059	0.0299145	1	0.181818	0.0844156							Cd72	0.464214
Tmem115	0.532782	0.0267634	1	0.0566802	0.102762							Llph	0.694243	0.00728027	1	0.192698	0.260771	Meis2	2.28314	0.00875292	1	0.297872	0.117117	Tax1bp3	1.48461	0.000115182	0.804893	0.424936	0.260684	Lman2	0.755248	0.00156232	1	0.436893	0.584	Igsf9	2.92382	0.030149	1	0.12987	0.0519481							Rplp0	1.08895
Hmgn2	0.813274	0.0267777	1	0.327935	0.423204							Pdk1	1.41045	0.00729404	1	0.300203	0.226757	Csrp2	3.00888	0.00878114	1	0.234043	0.0810811	Crtc2	2.38626	0.000115406	0.80634	0.21374	0.0940171	Tsta3	0.538276	0.00156249	1	0.0970874	0.202667	Aimp1	1.94767	0.030264	1	0.285714	0.188312							Dctn2	0.490908
Ssbp2	0.534566	0.0267928	1	0.0566802	0.102762							Cdo1	0.781218	0.00738114	1	0.302231	0.378685	Rilpl2	0.633956	0.00880235	1	0.468085	0.702703	Btg3	4.35369	0.000116112	0.811161	0.124682	0.034188	Bcap31	0.71936	0.00157944	1	0.359223	0.514667	Adam19	1.97148	0.030354	1	0.233766	0.123377							Stat4	0.623809
Mrps36	0.717593	0.0268905	1	0.1417	0.212155							Gm2115	1.46541	0.00746806	1	0.141988	0.0839002	Slc9a9	0.476015	0.00880268	1	0.212766	0.423423	Akr1a1	1.2436	0.000117105	0.81798	0.857506	0.696581	Blvra	0.640349	0.00158406	1	0.213592	0.354667	Zbtb16	2.88342	0.0304925	1	0.12987	0.0519481							Unc119b	2.71646
Map1lc3b	0.846799	0.0269882	1	0.465587	0.562431							Cebpzos	0.743853	0.00757116	1	0.322515	0.380952	Bcl2l11	0.173018	0.00886196	1	0.0212766	0.18018	Nr1h2	1.61795	0.000117445	0.820238	0.419847	0.269231	Pltp	0.642426	0.00158964	1	0.218447	0.344	Antxr2	1.73908	0.0305435	1	0.25974	0.142857							Plk2	0.116152
Prpf31	0.611829	0.0271286	1	0.0607287	0.109392							Esrrb	1.27115	0.0075876	1	0.381339	0.285714	Rsrc1	0.29407	0.00887754	1	0.0851064	0.27027	Exph5	2.49853	0.000117865	0.823055	0.185751	0.0726496	mt-Atp8	1.06055	0.0015919	1	1	0.997333	Adprhl2	2.00125	0.0306669	1	0.194805	0.0974026							Il2rg	0.831623
Ncbp2	0.585823	0.0272841	1	0.0647773	0.113812							Rgs11	1.48165	0.00767971	1	0.206897	0.14059	Arpc5l	0.640594	0.008979	1	0.468085	0.720721	Tnrc6a	1.6397	0.000118227	0.82546	0.386768	0.239316	Psmd13	0.700975	0.00159636	1	0.330097	0.482667	Tmx3	2.20942	0.0307072	1	0.181818	0.0909091							Cul1	0.383677
Ralbp1	0.718157	0.0274441	1	0.117409	0.179006							Fgfr1	1.48758	0.00768171	1	0.212982	0.147392	Pgls	0.722436	0.00903353	1	0.617021	0.828829	Rpl17	1.26104	0.000124441	0.868725	0.816794	0.662393	Tmem106a	0.649008	0.00161916	1	0.237864	0.370667	Fgd2	1.38568	0.0308285	1	0.532468	0.363636							Cited4	2.56518
Ptpn6	0.852629	0.0275731	1	0.534413	0.637569							Tuba1c	0.79159	0.00773273	1	0.464503	0.512472	Klk1b27	0.479424	0.00903376	1	0.191489	0.432432	Lgr4	1.84831	0.000126284	0.881464	0.318066	0.183761	Naa38	0.676974	0.0016206	1	0.247573	0.4	Lamp1	1.24695	0.0310338	1	0.792208	0.675325							Rpn2	0.603722
Bzw1	0.808956	0.0277085	1	0.352227	0.453039							Tcea3	1.4439	0.00790142	1	0.186613	0.120181	Ylpm1	2.57687	0.00903899	1	0.255319	0.0990991	Gbf1	1.85726	0.000126929	0.88584	0.244275	0.115385	Fpr2	2.10151	0.00162992	1	0.15534	0.072	Usp16	2.44122	0.0315715	1	0.181818	0.0909091							Pydc3	2.76852
Ywhah	0.782158	0.0277984	1	0.303644	0.383425							Rpsa	0.905636	0.00790437	1	0.718053	0.727891	Gm8797	0.657527	0.00907875	1	0.510638	0.828829	BC049715	3.80813	0.000127091	0.886843	0.119593	0.0299145	Cdc123	0.640207	0.00163677	1	0.160194	0.298667	Gpcpd1	1.67569	0.031899	1	0.285714	0.168831							Dcun1d1	0.140315
Eif2s1	0.726223	0.0278877	1	0.161943	0.230939							Mif4gd	0.75672	0.00792608	1	0.381339	0.430839	Ccr2	0.560986	0.00908475	1	0.382979	0.567568	Micall1	1.72098	0.000127355	0.888556	0.274809	0.136752	Rad23a	0.627141	0.00166841	1	0.199029	0.330667	Pla2g15	1.57827	0.0319998	1	0.38961	0.266234							Rgl1	0.000796253
D10Jhu81e	0.645273	0.0280188	1	0.105263	0.162431							Fibp	1.46165	0.00803996	1	0.219067	0.151927	Cldn15	2.60051	0.00912617	1	0.234043	0.0810811	Zc3h14	1.64844	0.000130914	0.913258	0.366412	0.217949	Mrpl40	0.605727	0.00172502	1	0.140777	0.264	Clcn3	2.40067	0.0320605	1	0.168831	0.0779221							Zfp655	0.000792142
Cd22	0.822217	0.0280419	1	0.404858	0.510497							Tceb3	1.58664	0.00806667	1	0.123732	0.0702948	Golga5	2.28696	0.00915645	1	0.340426	0.171171	Wsb1	1.50003	0.000131114	0.914521	0.46056	0.311966	Fmnl1	1.1638	0.00172681	1	0.834951	0.808	Lypla2	1.49028	0.0321662	1	0.350649	0.220779							Dhx29	0.000670605
Dynlt1b	0.767529	0.0280996	1	0.234818	0.318232							Gm44386	1.26451	0.00831262	1	0.470588	0.387755	Tex264	0.612055	0.00915804	1	0.297872	0.558559	Ubap2l	1.49963	0.000131492	0.917028	0.465649	0.311966	Terf1	0.497454	0.00173073	1	0.0679612	0.16	Nfyc	2.21701	0.0327564	1	0.181818	0.0909091							Numb	0.00070759
Ap2s1	0.707021	0.0282305	1	0.174089	0.237569							Ccdc12	0.75947	0.00831674	1	0.290061	0.367347	Gns	0.683299	0.00921147	1	0.574468	0.747748	Fnbp1l	1.78514	0.000132258	0.922236	0.356234	0.213675	Trmt112	0.793389	0.00173676	1	0.553398	0.717333	Gtf2h2	1.83841	0.0328798	1	0.233766	0.12987							Pot1b	0.000712799
Zfp91	1.62448	0.0283132	1	0.133603	0.0883978							Rnf130	1.37629	0.00833116	1	0.229209	0.15873	Phpt1	2.00412	0.00938794	1	0.425532	0.243243	Ppargc1a	1.3465	0.000132944	0.926887	0.638677	0.5	Trim30a	0.663233	0.00175558	1	0.199029	0.330667	Pip5k1c	1.64516	0.0331162	1	0.337662	0.220779							Polr1d	0.690065
Skil	0.563299	0.0283313	1	0.0566802	0.102762							Cystm1	0.894455	0.00834182	1	0.673428	0.673469	2022-09-06	0.461268	0.00940093	1	0.170213	0.396396	Phf10	2.07711	0.000134124	0.934979	0.206107	0.0897436	Flna	1.14045	0.00177178	1	0.88835	0.853333	Atxn7l1	0.314053	0.0332386	1	0.0649351	0.162338							Ilf2	1.97079
Kdm5b	0.594312	0.0284945	1	0.0607287	0.108287							Arl2bp	1.3633	0.00840509	1	0.223124	0.151927	Atp5e	0.836667	0.00948077	1	0.893617	0.963964	Gatm	1.41397	0.000135966	0.947686	0.234097	0.0982906	Fundc1	0.583196	0.00177273	1	0.15534	0.282667	Bcap29	2.09848	0.0332455	1	0.220779	0.123377							Gng5	0.821512
Gramd3	1.40672	0.0284993	1	0.165992	0.113812							Trabd2b	0.726869	0.00845338	1	0.221095	0.292517	Tex261	0.593405	0.00949231	1	0.297872	0.558559	Tmem45b	4.13851	0.00013606	0.948204	0.104326	0.0213675	Acaa1a	0.717179	0.00178454	1	0.364078	0.512	Plekho1	1.53843	0.0333402	1	0.350649	0.214286							Ak2	1.98401
1110059E24Rik	1.29434	0.0286306	1	0.275304	0.212155							Zfp706	0.862806	0.00846871	1	0.600406	0.612245	Slc29a3	0.439091	0.00950323	1	0.12766	0.351351	Gnpnat1	1.46338	0.000136355	0.950124	0.465649	0.311966	Tubb2a	0.597652	0.00178652	1	0.160194	0.277333	Trp53i13	2.13805	0.0335354	1	0.194805	0.0974026							Arf5	0.758368
Stard3nl	0.671253	0.028663	1	0.0809717	0.137017							Tor3a	1.77714	0.00849221	1	0.107505	0.0589569	Irf9	0.46281	0.00951252	1	0.212766	0.441441	Def6	3.45552	0.000136609	0.951755	0.119593	0.0299145	Idi1	0.446272	0.00179691	1	0.0825243	0.176	Abcd3	0.153375	0.0337378	1	0.025974	0.103896							Sec13	0.536353
Fcgr2b	1.3528	0.0286678	1	0.283401	0.228729							Tspo	0.846701	0.00849229	1	0.555781	0.596372	Hip1	2.97721	0.00962673	1	0.212766	0.0720721	Glrx2	1.42881	0.000136655	0.951936	0.562341	0.384615	Gas2l1	0.439331	0.00180777	1	0.0631068	0.152	Gba	2.06803	0.0339089	1	0.207792	0.11039							Rab5b	0.165035
Hmgb1	0.898231	0.0287117	1	0.716599	0.779006							Mcee	0.880849	0.00851676	1	0.653144	0.675737	Cdk12	0.109251	0.00966643	1	0.0212766	0.171171	Nisch	1.44666	0.000136819	0.952947	0.541985	0.376068	Tuba1b	0.775656	0.00182391	1	0.553398	0.666667	Miox	1.44026	0.0339176	1	0.272727	0.142857							Rplp1	1.04028
Rps18	0.958724	0.0287434	1	0.919028	0.938122							Csnk1g2	1.50328	0.00864082	1	0.170385	0.108844	Ncoa3	2.71959	0.0098775	1	0.297872	0.126126	Shisa4	2.6818	0.000137394	0.956812	0.180662	0.0726496	Cacybp	0.677395	0.00182791	1	0.223301	0.368	Cd83	1.33286	0.0342495	1	0.636364	0.480519							Ccl5	0.920803
Phf6	1.55774	0.0287713	1	0.157895	0.111602							Rilpl1	1.4542	0.00865342	1	0.11359	0.0634921	2310011J03Rik	0.476569	0.010001	1	0.191489	0.423423	Ubn2	1.99004	0.000138444	0.963986	0.251908	0.123932	Relb	0.626952	0.0018299	1	0.15534	0.282667	Rab8b	2.32263	0.0342909	1	0.181818	0.0909091							Ddrgk1	0.528813
Herc4	1.3646	0.0290701	1	0.287449	0.235359							Chchd3	0.818552	0.00865679	1	0.466531	0.521542	2022-09-04	2.42451	0.0100367	1	0.276596	0.108108	Stk40	2.07572	0.00013853	0.964444	0.221374	0.0982906	Pdgfb	0.29918	0.00186296	1	0.0291262	0.101333	Ngfrap1	1.73262	0.0343374	1	0.311688	0.194805							Vps13a	2.28875
Timm22	0.642086	0.029207	1	0.0647773	0.114917							Fbp1	1.33857	0.00872771	1	0.235294	0.160998	Zcchc14	4.64229	0.0102005	1	0.148936	0.036036	Vav3	1.78979	0.000138782	0.966061	0.328244	0.183761	Phb2	0.738063	0.00188367	1	0.417476	0.568	Rpl35a	1.13881	0.0343519	1	0.987013	0.915584							Rps6	1.11785
Il21r	0.766751	0.0292409	1	0.206478	0.283978							Dynlt1b	0.783444	0.00873013	1	0.330629	0.396825	Tagap	0.546918	0.0102409	1	0.255319	0.504505	Wwc2	1.44106	0.000139846	0.973331	0.544529	0.371795	Ankrd52	0.412231	0.00188439	1	0.0291262	0.101333	Pcm1	2.45234	0.0344823	1	0.155844	0.0714286							Tmem199	2.59779
Ccnd3	1.32121	0.029283	1	0.34413	0.283978							Slc4a3	1.39276	0.00878281	1	0.188641	0.122449	H2-Q6	0.483129	0.0103121	1	0.234043	0.459459	Cln3	1.61995	0.000140169	0.975435	0.407125	0.260684	Tab2	1.55438	0.00189484	1	0.446602	0.362667	Dnajc8	1.4354	0.0345174	1	0.298701	0.168831							Cmc1	0.546312
Sin3b	0.769178	0.0294823	1	0.234818	0.314917							Vmp1	1.3368	0.00883383	1	0.257606	0.181406	Ptma	1.07806	0.0103606	1	1	0.972973	mt-Cytb	0.942619	0.000140204	0.975539	1	1	Cux1	0.652245	0.00193961	1	0.228155	0.365333	Ccni	1.99815	0.0345302	1	0.25974	0.155844							Med12	0.39254
Ring1	0.565535	0.029611	1	0.0607287	0.107182							9930021J03Rik	1.57336	0.00895673	1	0.11359	0.0634921	Snx5	0.740539	0.0103773	1	0.638298	0.774775	Cst3	0.840293	0.00014261	0.992141	0.768448	0.769231	Plekhg1	2.997	0.00196938	1	0.150485	0.0746667	Ankrd54	2.85299	0.0346112	1	0.142857	0.0649351							Rfx7	2.92144
Tbk1	0.66969	0.0298609	1	0.0647773	0.114917							Cacybp	0.679965	0.00903565	1	0.198783	0.263039	Adrb2	0.262518	0.0105038	1	0.0851064	0.261261	Slirp	1.44019	0.000144007	1	0.559796	0.384615	Lonp2	0.489076	0.00197417	1	0.101942	0.205333	Stk38	1.89466	0.0346424	1	0.285714	0.175325							Tespa1	2.27934
Nek7	0.682973	0.02989	1	0.11336	0.174586							Akr1b10	0.576536	0.00903747	1	0.0892495	0.142857	Rps6ka1	0.638754	0.0106228	1	0.425532	0.711712	Gna13	1.89494	0.000144968	1	0.315522	0.183761	mt-Co2	1.0457	0.00197756	1	0.995146	0.997333	Exosc5	1.83852	0.0347914	1	0.25974	0.155844							Zeb2	0.557819
Cox7b	0.829782	0.0300324	1	0.37247	0.449724							Fkbp1a	0.749281	0.00909174	1	0.332657	0.385488	Tmem41a	4.64516	0.0107194	1	0.148936	0.036036	Nbeal2	2.00181	0.000146374	1	0.195929	0.0769231	Ascc3	0.575856	0.00198118	1	0.0825243	0.181333	Khk	1.41351	0.03483	1	0.298701	0.162338							Rps3a1	1.0563
Adgre5	0.836239	0.0301985	1	0.449393	0.531492							Gnb1	1.3716	0.00909248	1	0.263692	0.190476	Vat1	2.05168	0.0107392	1	0.319149	0.135135	Eef1b2	0.865302	0.000146642	1	0.78626	0.777778	Napa	0.717333	0.00198912	1	0.339806	0.490667	Pim1	1.43467	0.0351265	1	0.519481	0.37013							Sun2	1.40731
Rnf146	0.66661	0.0303165	1	0.125506	0.183425							Scrn2	0.613577	0.00913815	1	0.0993915	0.154195	Tmem86a	0.263099	0.0107392	1	0.0638298	0.243243	Slc35g1	2.30091	0.000148329	1	0.167939	0.0598291	Pisd	0.659425	0.00199372	1	0.18932	0.322667	Chkb	1.94446	0.0354972	1	0.246753	0.142857							Zkscan14	2.42497
Rps27	1.01705	0.0304201	1	0.967611	0.975691							Apoa2	1.8219	0.00917136	1	0.115619	0.0657596	Cks2	0.28503	0.0108429	1	0.0425532	0.216216	Trim2	1.54983	0.000148813	1	0.46056	0.303419	Ncf4	0.838971	0.0020013	1	0.699029	0.776	Btf3l4	1.80055	0.0355029	1	0.25974	0.162338							Tmem181a	0.502554
Amd1	1.59258	0.030622	1	0.145749	0.0994475							Stt3b	1.47024	0.009213	1	0.166329	0.106576	Appl2	3.24453	0.0108834	1	0.234043	0.0900901	Ttc19	1.99876	0.000149095	1	0.244275	0.119658	Chmp2a	0.783821	0.00203734	1	0.504854	0.669333	Adgre5	1.62251	0.0355917	1	0.324675	0.201299							Mrpl57	1.82299
Rps2	1.01326	0.0308114	1	0.97166	0.977901							Azi2	0.664622	0.00926971	1	0.186613	0.247166	Klra17	0.552935	0.0109217	1	0.234043	0.468468	Gsto1	1.43924	0.00014929	1	0.526718	0.358974	Eif2ak2	0.565271	0.00206989	1	0.121359	0.232	Zc3h13	3.49115	0.0357579	1	0.116883	0.0454545							Rpl30	1.06301
Prkca	1.50055	0.0308369	1	0.149798	0.102762							Sf3b6	0.790858	0.0093487	1	0.348884	0.421769	Rasgrp3	4.57001	0.0109875	1	0.148936	0.036036	Chka	1.43176	0.000149949	1	0.557252	0.384615	Nhp2	0.672742	0.00207781	1	0.242718	0.384	3110040N11Rik	2.63989	0.035878	1	0.155844	0.0714286							1810006J02Rik	0.154943
Klf4	0.724074	0.0309125	1	0.161943	0.228729							Hsph1	0.619447	0.00940488	1	0.107505	0.163265	Ube2w	0.387769	0.0110271	1	0.12766	0.324324	Ube2j2	1.87516	0.000154659	1	0.279898	0.145299	Tmem33	0.604173	0.00208355	1	0.160194	0.288	Arl11	3.12099	0.036071	1	0.142857	0.0649351							Tubb4b	0.697714
Nhp2	0.750516	0.0310437	1	0.182186	0.255249							Pard6b	1.76097	0.00947988	1	0.117647	0.0680272	Ikbkg	0.135804	0.0110394	1	0.0212766	0.171171	mt-Nd1	0.937446	0.000155397	1	1	1	Ehd4	0.745302	0.002087	1	0.432039	0.568	Slfn2	0.535236	0.0362418	1	0.220779	0.344156							Sf3b4	0.42321
Ppp1r16b	0.66814	0.0310765	1	0.11336	0.171271							Sephs2	0.69117	0.00949149	1	0.233266	0.294785	Manf	0.717645	0.0110794	1	0.659574	0.774775	Usp53	1.69244	0.000155965	1	0.371501	0.230769	Tspo	0.827276	0.00211061	1	0.650485	0.738667	Krr1	2.18097	0.0363216	1	0.168831	0.0779221							Dtx3	1.88909
Psme2	0.783894	0.0311872	1	0.323887	0.416575							Ybx1	1.13864	0.00961668	1	0.699797	0.643991	Eif1	0.907605	0.0111204	1	0.93617	0.972973	Sgk1	4.3544	0.000160507	1	0.109415	0.025641	Dnaja1	0.761266	0.00211883	1	0.514563	0.629333	Tmem106c	2.1143	0.0363216	1	0.168831	0.0779221							Meaf6	0.112265
Mtfr1	0.591213	0.0314809	1	0.0688259	0.116022							Mlf2	0.837494	0.00969391	1	0.464503	0.517007	Sertad3	0.410367	0.0111508	1	0.106383	0.306306	P4hb	0.805522	0.000163212	1	0.707379	0.705128	Zcchc17	0.585486	0.00212186	1	0.131068	0.250667	Entpd1	1.76983	0.0364505	1	0.311688	0.201299							Cd52	0.900924
Tmem219	0.663379	0.0315126	1	0.105263	0.161326							Tsc1	1.6553	0.00970559	1	0.146045	0.0907029	Hspa5	0.780928	0.011204	1	0.723404	0.810811	Pdcd4	1.66217	0.000164422	1	0.254453	0.119658	Mesdc2	0.549702	0.00213812	1	0.0825243	0.181333	Cul4a	2.34914	0.036462	1	0.12987	0.0519481							Llph	1.49437
Tspyl1	0.707367	0.0315577	1	0.125506	0.18674							Klk1	0.864986	0.00970596	1	0.701826	0.746032	Gimap9	4.46876	0.0112276	1	0.191489	0.0630631	Dynll1	1.34355	0.000165103	1	0.689567	0.512821	Prpf19	0.645638	0.00215277	1	0.203883	0.341333	Ndfip2	2.52722	0.0365937	1	0.155844	0.0714286							Akt2	0.432124
Ndufs8	0.769482	0.031562	1	0.238866	0.314917							Rab5b	1.34963	0.00973189	1	0.312373	0.235828	Gin1	0.000995196	0.0112518	1	0	0.126126	Atox1	1.25604	0.000167697	1	0.806616	0.65812	Sra1	0.736419	0.00215641	1	0.354369	0.509333	Ddit3	1.58245	0.0367095	1	0.272727	0.155844							Sgk1	0.522346
Snx20	0.725974	0.031674	1	0.165992	0.232044							N6amt2	0.586919	0.0097974	1	0.0912779	0.142857	Gm19705	0.000861039	0.0112518	1	0	0.126126	Syngr2	1.58888	0.000169006	1	0.389313	0.235043	Xrn2	0.700877	0.00216866	1	0.349515	0.512	Rassf4	1.43447	0.0368574	1	0.467532	0.331169							Cxx1b	0.000894028
Atg4b	0.602799	0.0317479	1	0.0688259	0.117127							Prkag2	1.32395	0.00981281	1	0.206897	0.136054	Slc7a7	0.000758836	0.0112518	1	0	0.126126	Hsd17b14	1.56476	0.000169763	1	0.399491	0.247863	Dad1	0.792742	0.00217391	1	0.553398	0.704	Dpp4	0.201609	0.0368661	1	0.025974	0.103896							Gtf3c1	0.000821761
Sgms1	0.775766	0.0317517	1	0.149798	0.21768							Man2b2	1.50191	0.00988861	1	0.15213	0.0929705	Wdr24	0.000906642	0.0112518	1	0	0.126126	Tspan1	1.63868	0.000170141	1	0.396947	0.25641	Cbfa2t3	0.748526	0.0021745	1	0.432039	0.6	Tnip2	2.07514	0.0369702	1	0.220779	0.123377							Scml4	0.000810265
mt-Nd3	1.43912	0.031837	1	0.202429	0.150276							Hadhb	0.872684	0.00993667	1	0.628803	0.659864	Sh3d21	3.48439	0.0112616	1	0.148936	0.036036	Ubxn2a	1.47665	0.000171972	1	0.501272	0.32906	Parp10	0.424738	0.00218916	1	0.0582524	0.146667	Nudt16l1	2.09721	0.0372079	1	0.181818	0.0909091							mt-Co2	1.06527
Dock11	0.658598	0.0318542	1	0.11336	0.170166							Slc25a23	1.26609	0.00995669	1	0.340771	0.249433	Srprb	4.28423	0.0112616	1	0.148936	0.036036	Eif4ebp3	2.17004	0.000173707	1	0.198473	0.0854701	Slbp	0.664114	0.00220584	1	0.247573	0.389333	Mdh1	1.33961	0.0372874	1	0.597403	0.428571							Fbp1	1.99255
Pafah1b2	0.67819	0.0320468	1	0.0688259	0.119337							Acy3	0.490752	0.0100196	1	0.146045	0.199546	Clp1	0.28076	0.0112641	1	0.0638298	0.243243	Pafah1b1	1.45416	0.000176404	1	0.501272	0.346154	Crlf2	0.735523	0.00220731	1	0.466019	0.586667	Pop7	2.43279	0.0373216	1	0.155844	0.0714286							Tubb2a	0.306139
Rpl36a	1.04126	0.0322381	1	0.94332	0.943646							Pdgfa	1.62948	0.0101026	1	0.1643	0.106576	Ccnt2	0.520125	0.0114233	1	0.170213	0.405405	Dusp16	2.59738	0.000176831	1	0.145038	0.0470085	Itga4	1.2559	0.00223333	1	0.674757	0.650667	1500011K16Rik	0.337354	0.0376051	1	0.0649351	0.162338							Sypl	0.516216
Srrm2	0.827144	0.0323065	1	0.327935	0.41989							Rnf38	2.16163	0.0101276	1	0.10142	0.0566893	Mpeg1	0.701477	0.0114299	1	0.553191	0.747748	Srsf3	1.3828	0.000177504	1	0.62341	0.457265	Ccar2	0.369801	0.00224154	1	0.038835	0.114667	A230046K03Rik	2.19697	0.0377263	1	0.168831	0.0779221							Bin2	0.782219
Rabif	0.669957	0.03252	1	0.0728745	0.123757							Phf20	1.59356	0.0101381	1	0.129817	0.0770975	Unkl	8.052	0.0114632	1	0.12766	0.027027	Eef2	0.937075	0.000177748	1	0.931298	0.893162	Bambi	0.430722	0.00224401	1	0.0485437	0.130667	Opa3	3.21369	0.0378991	1	0.116883	0.0454545							Ramp1	4.37811
Cenpq	0.626616	0.0325241	1	0.0688259	0.117127							Pecr	0.556149	0.0102068	1	0.0892495	0.14059	Arhgef10	0.377584	0.0115101	1	0.106383	0.324324	Apopt1	1.55942	0.000177993	1	0.475827	0.316239	Ifnar2	0.750507	0.00227266	1	0.504854	0.637333	Nptn	1.2935	0.0379278	1	0.597403	0.454545							Sel1l	0.294314
Eif2b2	0.687909	0.0325548	1	0.129555	0.19116							Golga5	1.60598	0.010209	1	0.144016	0.0884354	Armc3	0.141377	0.011679	1	0.0212766	0.171171	Asrgl1	2.69917	0.000180274	1	0.16285	0.0598291	Vcp	0.752808	0.00227874	1	0.485437	0.613333	Arhgap18	1.63669	0.0380288	1	0.298701	0.181818							Kif1b	0.260928
Ctsa	0.801952	0.0325752	1	0.34413	0.422099							Plscr2	0.791423	0.0102843	1	0.393509	0.442177	Ppp1r15a	0.629743	0.0116815	1	0.382979	0.630631	Hnrnpu	1.62622	0.00018281	1	0.363868	0.222222	Smox	0.586934	0.00229429	1	0.092233	0.194667	Eif3l	1.47222	0.038138	1	0.428571	0.298701							Fam189b	1.59145
Zmiz1	1.53559	0.0326805	1	0.17004	0.121547							Rmnd5a	1.66001	0.0102903	1	0.150101	0.0952381	Zc2hc1a	3.56897	0.011702	1	0.191489	0.0630631	Nosip	1.88089	0.000183079	1	0.292621	0.15812	Napsa	0.853563	0.00230693	1	0.771845	0.850667	Zfp664	2.87575	0.038359	1	0.142857	0.0649351							Nudcd2	0.19957
Atg4d	0.702757	0.0329122	1	0.109312	0.166851							Fxyd2	0.994689	0.010493	1	0.98783	0.984127	Pak4	3.64281	0.011702	1	0.191489	0.0630631	Bclaf1	1.60824	0.000184289	1	0.417303	0.269231	Pcnp	0.670309	0.00232316	1	0.18932	0.325333	Cnp	1.65722	0.0384482	1	0.246753	0.136364							Gramd3	3.42597
Mycbp	0.637291	0.0329202	1	0.0769231	0.127072							Aarsd1	0.609925	0.0105	1	0.139959	0.195011	Klf10	3.18839	0.0117143	1	0.234043	0.0900901	Rpl11	1.11785	0.000185343	1	0.984733	0.91453	Ercc1	0.521366	0.00232521	1	0.0873786	0.186667	Acer3	1.40311	0.038549	1	0.454545	0.324675							Plekho2	0.450039
Klf13	1.43341	0.0331466	1	0.17004	0.120442							Ano6	1.35687	0.0105085	1	0.271805	0.199546	Tecr	0.667005	0.0117265	1	0.510638	0.72973	Cttn	1.49626	0.000185475	1	0.468193	0.303419	Ywhaq	0.755077	0.00235588	1	0.383495	0.562667	Mri1	2.17912	0.0385706	1	0.181818	0.0909091							Cln5	2.12652
Arl6ip1	1.14758	0.0331785	1	0.522267	0.502762							Map1lc3a	0.813326	0.0105363	1	0.425963	0.478458	Atp9a	5.5016	0.0117761	1	0.12766	0.027027	Zfand5	1.48464	0.000186116	1	0.475827	0.311966	Tpr	0.780614	0.00235671	1	0.519417	0.677333	Snapc5	1.79285	0.0386302	1	0.25974	0.155844							Isca1	0.515404
1810043H04Rik	0.731165	0.0334526	1	0.145749	0.212155							Bsnd	0.75063	0.0106219	1	0.31643	0.376417	Slc38a7	5.29365	0.0117761	1	0.12766	0.027027	Rab11fip4	1.52755	0.000186858	1	0.35369	0.200855	Stard3	0.709737	0.00236091	1	0.262136	0.4	Lacc1	1.51418	0.0387	1	0.363636	0.24026							Dbnl	0.699242
Nfkb2	0.779198	0.0336347	1	0.255061	0.332597							Egr1	0.552255	0.0106353	1	0.0912779	0.142857	Znrd1as	5.86765	0.0117761	1	0.12766	0.027027	Rai1	3.57112	0.000187976	1	0.150127	0.0555556	Atf6	0.674985	0.00240024	1	0.281553	0.408	Sumo2	0.748869	0.0387304	1	0.545455	0.642857							Rnf10	1.51203
Wdfy4	1.50482	0.0336517	1	0.194332	0.144751							Mtx2	0.800081	0.0106505	1	0.369168	0.428571	Emcn	2.0562	0.0118116	1	0.319149	0.135135	Plscr2	1.26124	0.000190035	1	0.778626	0.623932	Sp140	0.686915	0.00240354	1	0.291262	0.432	Clasp2	2.25032	0.0388144	1	0.155844	0.0714286							Bloc1s1	0.613206
H2-Ke6	0.730056	0.0336535	1	0.165992	0.233149							Atp6v0e	0.896201	0.010684	1	0.69574	0.739229	I830077J02Rik	0.441565	0.0118729	1	0.191489	0.396396	Rpl21	1.12963	0.000199596	1	0.949109	0.880342	Nsfl1c	0.598188	0.0024286	1	0.184466	0.306667	Mapkapk2	1.909	0.0388594	1	0.220779	0.12987							Osm	0.153718
Psmb10	0.784782	0.0337426	1	0.222672	0.304972							Slc25a13	0.625681	0.0107317	1	0.162272	0.219955	Impdh1	2.1746	0.0118994	1	0.234043	0.0810811	Med7	1.68936	0.000207623	1	0.338422	0.192308	Hsd3b7	0.470473	0.00243152	1	0.0728155	0.162667	Slamf7	1.39755	0.0389924	1	0.441558	0.285714							Slc25a51	2.21874
Rnf20	0.648263	0.0338019	1	0.097166	0.149171							Hnrnpul2	1.19891	0.0107332	1	0.255578	0.172336	Fstl3	0.210285	0.0118994	1	0.0212766	0.171171	Lgals3	1.33748	0.00021737	1	0.689567	0.534188	Shisa5	0.852647	0.00243407	1	0.694175	0.749333	Cwf19l2	4.49343	0.03911	1	0.103896	0.038961							Atp6ap1	0.510374
Clns1a	0.670636	0.0338359	1	0.121457	0.177901							Ppp1r14b	1.41546	0.0107557	1	0.170385	0.108844	Slamf9	0.576821	0.0119979	1	0.340426	0.576577	Arl15	1.64816	0.000219258	1	0.292621	0.153846	Lsp1	1.09654	0.00246389	1	0.883495	0.866667	Ptbp3	1.40607	0.0391258	1	0.38961	0.246753							mt-Cytb	1.08162
Eif3d	0.786438	0.0340846	1	0.251012	0.335912							Ptov1	1.30143	0.0109353	1	0.298174	0.217687	Arhgap9	0.393023	0.0120045	1	0.12766	0.315315	Snrpd2	1.34294	0.000220879	1	0.641221	0.465812	Vps35	0.65584	0.00246421	1	0.213592	0.346667	Cd79b	1.55817	0.0392275	1	0.272727	0.155844							Rpl36a	1.13645
Mysm1	1.47425	0.0341966	1	0.153846	0.106077							2022-09-09	1.34936	0.0110048	1	0.182556	0.117914	Tapt1	0.113768	0.0120263	1	0.0212766	0.162162	Tmcc3	1.75077	0.000224537	1	0.274809	0.145299	Gm1673	2.49795	0.0024855	1	0.165049	0.088	Prdx6	1.60951	0.0393241	1	0.350649	0.246753							Rpl29	1.10669
Ssrp1	0.793328	0.0344879	1	0.238866	0.314917							Haghl	1.32902	0.0110914	1	0.27789	0.201814	Dlst	0.602746	0.012032	1	0.212766	0.468468	Cdk5rap3	1.63432	0.00022713	1	0.351145	0.205128	Glmp	0.721971	0.0025353	1	0.296117	0.450667	Chfr	2.04593	0.0393715	1	0.12987	0.0519481							mt-Co3	1.06476
Plbd1	1.8805	0.0345271	1	0.109312	0.0718232							Phactr2	1.61916	0.0112188	1	0.150101	0.0952381	Pgam2	6.01579	0.0120966	1	0.12766	0.027027	Pea15a	1.65379	0.000228729	1	0.335878	0.188034	Rab19	0.425748	0.00256809	1	0.0679612	0.154667	1110037F02Rik	0.260041	0.0393715	1	0.025974	0.103896							Rpl39	1.05266
Phf3	0.623673	0.0349179	1	0.11336	0.164641							Ppargc1a	1.21677	0.011279	1	0.470588	0.37415	Cldn5	6.23925	0.0120966	1	0.12766	0.027027	Ranbp2	1.89457	0.00022903	1	0.3257	0.196581	Cdk5rap1	0.411698	0.00261154	1	0.0339806	0.106667	Pkig	1.71006	0.0393738	1	0.285714	0.168831							Prpf4b	1.78664
Ptp4a3	0.839901	0.0350281	1	0.493927	0.58011							Ankrd40	1.40018	0.0113041	1	0.227181	0.160998	Rbms1	1.62453	0.0121044	1	0.574468	0.432432	Sox6	1.72799	0.000229486	1	0.287532	0.153846	Anxa11	0.68152	0.00262825	1	0.257282	0.410667	Dus1l	2.09574	0.0395796	1	0.155844	0.0714286							Cyfip2	0.662665
Tsc22d4	0.825826	0.0351879	1	0.34413	0.446409							Ahctf1	1.79047	0.011308	1	0.10142	0.0566893	Fstl1	2.32296	0.0121235	1	0.234043	0.0810811	Mrgbp	2.84466	0.00023199	1	0.152672	0.0555556	Topors	0.46411	0.00263873	1	0.0631068	0.149333	Ndufv3	0.584353	0.0397028	1	0.246753	0.383117							BC017643	0.48423
Ndufb6	0.78539	0.0352428	1	0.242915	0.320442							Slc20a2	1.84025	0.011308	1	0.10142	0.0566893	Zfyve19	0.360474	0.0121491	1	0.106383	0.306306	Msrb2	1.59719	0.000234613	1	0.346056	0.209402	Slc39a7	0.723469	0.00264103	1	0.26699	0.410667	Rtn3	1.31004	0.0397595	1	0.454545	0.298701							Spg21	0.482583
Lsm3	0.738574	0.0353591	1	0.153846	0.220994							Eps8l2	1.24658	0.0114191	1	0.411765	0.324263	Calr	0.646312	0.0121554	1	0.489362	0.72973	Bcam	0.746441	0.000234977	1	0.605598	0.632479	Skap2	0.749621	0.00266109	1	0.495146	0.608	Vps29	0.54024	0.0398296	1	0.194805	0.324675							2310011J03Rik	0.4469
Frg1	0.739188	0.0353606	1	0.182186	0.247514							Gcdh	0.742965	0.0114601	1	0.231237	0.297052	Tcea2	8.8716	0.0121761	1	0.106383	0.018018	Sirt7	1.65017	0.000237228	1	0.348601	0.205128	Eif3m	0.739828	0.00269789	1	0.402913	0.544	Ifi27	1.53648	0.0398968	1	0.350649	0.220779							Nt5c	0.578689
Card6	1.40773	0.0358772	1	0.214575	0.162431							Tpmt	1.27809	0.0115009	1	0.310345	0.231293	Cd34	2.27673	0.0121855	1	0.340426	0.171171	Larp1b	1.64935	0.000241183	1	0.371501	0.239316	Snx2	0.729494	0.00271526	1	0.349515	0.498667	Clec4a1	1.82045	0.0399793	1	0.220779	0.116883							Fnbp1	0.545628
Lsm14a	0.633945	0.0359184	1	0.0647773	0.111602							Sft2d2	1.38245	0.0115615	1	0.21501	0.147392	Wrn	0.359042	0.0121896	1	0.0638298	0.243243	Npc2	0.658985	0.000244458	1	0.391858	0.504274	Ifitm6	1.15332	0.00273883	1	0.73301	0.730667	Map4k4	2.87407	0.0401484	1	0.116883	0.0454545							Nipbl	0.49068
Eps15	0.731822	0.0359951	1	0.125506	0.18895							Prr12	1.68775	0.0115757	1	0.111562	0.0634921	Rps16	0.923147	0.0123239	1	0.957447	0.972973	Cchcr1	1.91256	0.000248837	1	0.302799	0.175214	Zbtb8os	0.62911	0.00274839	1	0.174757	0.293333	1810026J23Rik	2.89149	0.0401484	1	0.116883	0.0454545							Ptp4a3	0.588433
Entpd5	0.585705	0.0364157	1	0.0728745	0.119337							Nol3	0.776338	0.0115854	1	0.381339	0.435374	Lmo1	6.50191	0.0124248	1	0.12766	0.027027	Srsf1	1.75517	0.000248861	1	0.340967	0.209402	Gbp3	0.38859	0.00274965	1	0.0436893	0.12	Paxbp1	3.27423	0.0401484	1	0.116883	0.0454545							Nufip2	0.135323
Rnh1	0.722064	0.0365105	1	0.17004	0.233149							Tbc1d4	1.38371	0.0116101	1	0.148073	0.0907029	Clu	5.56891	0.0124248	1	0.12766	0.027027	Smarca4	1.62594	0.000249148	1	0.389313	0.25641	Cacfd1	2.08005	0.00275219	1	0.203883	0.12	Ly6e	0.802215	0.0401706	1	0.675325	0.74026							Gba	0.37641
Actr8	0.604478	0.0365898	1	0.0688259	0.114917							Ttc3	1.32877	0.0116373	1	0.294118	0.217687	Ifi203	0.472235	0.0124806	1	0.212766	0.432432	Mcl1	1.4886	0.000249758	1	0.48855	0.324786	Ralb	0.725929	0.00276158	1	0.271845	0.421333	Mysm1	0.274032	0.0402382	1	0.025974	0.103896							S100a13	0.74656
Ttc33	0.590152	0.0366478	1	0.0728745	0.119337							B3glct	1.47416	0.0117144	1	0.109533	0.0612245	Clip3	8.84461	0.0125485	1	0.106383	0.018018	Acot9	1.67536	0.000250601	1	0.35369	0.213675	Arpc4	0.843111	0.00277084	1	0.718447	0.808	9030624J02Rik	2.36626	0.0403575	1	0.155844	0.0714286							Ndufs3	0.489269
Dnlz	0.601251	0.036915	1	0.0688259	0.116022							Suclg1	0.87778	0.0117507	1	0.626775	0.623583	Pdzd2	8.76715	0.0125485	1	0.106383	0.018018	Rnf111	2.50627	0.000251026	1	0.170483	0.0683761	Spata13	1.7808	0.00277868	1	0.223301	0.130667	2022-03-02	1.49574	0.0407453	1	0.350649	0.233766							Mrpl44	2.29964
Ppp2r2a	0.752831	0.0370568	1	0.178138	0.247514							Gm17767	0.636531	0.0117847	1	0.10142	0.156463	D13Ertd608e	0.569536	0.0125824	1	0.297872	0.558559	Ptp4a1	1.4471	0.000252488	1	0.513995	0.371795	Cdc42	0.902629	0.00279167	1	0.796117	0.832	Ifi47	0.462978	0.040884	1	0.103896	0.207792							Ralgapa2	2.46545
Gclm	0.640278	0.0371275	1	0.109312	0.161326							Hmgn2	0.759682	0.0117874	1	0.251521	0.321995	Nfic	2.22092	0.0126286	1	0.382979	0.225225	Dlg3	2.34355	0.000252569	1	0.147583	0.0512821	G3bp1	0.671064	0.00279662	1	0.276699	0.405333	Mfge8	2.34263	0.0410793	1	0.116883	0.0454545							Tmem176a	2.0561
Raver1	0.698238	0.0371386	1	0.121457	0.18011							Capns1	1.23744	0.0118073	1	0.446247	0.353741	Ctnna1	1.59673	0.0127036	1	0.553191	0.405405	Pcm1	1.76467	0.00025902	1	0.3257	0.188034	Myg1	0.500227	0.00283252	1	0.0631068	0.149333	Kif5b	1.80037	0.0411891	1	0.272727	0.168831							Prps2	0.130092
Lsm2	0.616517	0.037165	1	0.0728745	0.120442							Calml4	0.575031	0.0118709	1	0.0669371	0.113379	Anapc5	0.671816	0.0127506	1	0.553191	0.747748	Pds5a	1.97367	0.000259469	1	0.21374	0.0982906	Ace	1.32969	0.00288029	1	0.57767	0.482667	Cd36	1.30248	0.0414239	1	0.61039	0.441558							Fam13b	0.178252
Ndfip2	0.611554	0.0377125	1	0.0769231	0.124862							Coq5	0.701134	0.0118725	1	0.176471	0.238095	Arhgap17	0.658286	0.0127902	1	0.531915	0.684685	4833420G17Rik	2.68007	0.000266178	1	0.152672	0.0555556	Cct2	0.742289	0.00289646	1	0.436893	0.584	Vps72	1.9112	0.0414683	1	0.233766	0.136364							Srp19	0.563515
Birc3	1.19616	0.0379412	1	0.465587	0.41326							Dmxl1	1.73886	0.0118737	1	0.115619	0.0680272	Tbc1d8	0.651369	0.0128827	1	0.468085	0.702703	Hist2h2aa1	3.58951	0.000267389	1	0.119593	0.034188	Limd2	1.20374	0.00295512	1	0.742718	0.706667	Hdgfrp2	0.355388	0.0414721	1	0.0779221	0.175325							Nfkbid	0.278047
Smu1	0.76432	0.0379829	1	0.165992	0.230939							Aifm1	0.702536	0.0119022	1	0.279919	0.335601	Cav1	2.53795	0.0128986	1	0.255319	0.0990991	Azin1	1.40994	0.000268631	1	0.559796	0.401709	Spink1	1.81015	0.00296442	1	0.237864	0.141333	PISD	1.54869	0.0414813	1	0.337662	0.214286							Sdhc	0.445867
Pcbd2	0.679071	0.0381007	1	0.0647773	0.111602							Borcs8	0.70085	0.0119932	1	0.257606	0.315193	Mcts2	14.9013	0.012931	1	0.106383	0.018018	Arcn1	1.59397	0.000271809	1	0.407125	0.264957	Nab2	0.308836	0.00297096	1	0.0436893	0.117333	Scamp4	2.43023	0.041526	1	0.168831	0.0844156							Rpp25l	1.88226
Rsf1	0.699794	0.038504	1	0.11336	0.171271							Rabep2	1.61476	0.0120222	1	0.105477	0.0589569	Cyb561	10.7316	0.012931	1	0.106383	0.018018	Hspb1	0.411589	0.000275185	1	0.0966921	0.192308	Slfn8	0.444294	0.00302346	1	0.0728155	0.16	2810403A07Rik	1.87663	0.0415488	1	0.155844	0.0714286							Rpl36	1.0548
Eif3m	1.18901	0.0386462	1	0.453441	0.416575							Arl6ip1	1.14349	0.0121662	1	0.673428	0.603175	Smagp	3.65206	0.0129668	1	0.191489	0.0630631	Metap2	1.29954	0.000276245	1	0.689567	0.495726	Trim30d	0.438203	0.00303509	1	0.0485437	0.128	Rps18	0.911833	0.0416211	1	0.883117	0.87013							Rabgap1l	0.49645
Ctbp1	0.610137	0.0387195	1	0.0890688	0.138122							Phyh	0.898386	0.0121781	1	0.748479	0.802721	Dusp3	2.93421	0.0130689	1	0.255319	0.108108	Kansl1	1.81131	0.000280225	1	0.251908	0.123932	Eif6	0.72778	0.00306502	1	0.34466	0.496	Jund	1.36365	0.0416978	1	0.584416	0.435065							Pfkl	0.33714
Mrpl39	0.611566	0.0387479	1	0.0809717	0.128177							Brap	0.710006	0.0121857	1	0.221095	0.285714	Gtf2ird1	3.81212	0.0131049	1	0.12766	0.027027	Acin1	1.47739	0.000281374	1	0.475827	0.320513	Zdhhc6	0.682129	0.00307435	1	0.242718	0.376	Fam105a	1.3648	0.0418794	1	0.545455	0.396104							Stat3	0.631499
Rplp1	0.963596	0.0387688	1	0.947368	0.972376							Rtn4	1.41549	0.0122986	1	0.198783	0.136054	Kap	0.542847	0.0132219	1	0.319149	0.585586	Gm11789	1.62059	0.000282572	1	0.414758	0.277778	Edem1	0.595762	0.00307811	1	0.194175	0.317333	Apba3	3.0258	0.0420217	1	0.142857	0.0649351							Vti1b	0.613545
Tob1	0.703828	0.0388254	1	0.117409	0.175691							Ssh1	1.53189	0.0123261	1	0.111562	0.0634921	Lrrc32	2.97732	0.0132338	1	0.191489	0.0630631	Arrdc4	1.78185	0.000284133	1	0.274809	0.149573	Surf4	0.716962	0.00307833	1	0.364078	0.498667	Nfe2l2	1.35931	0.0420271	1	0.597403	0.454545							Rac3	0.35009
Ndufv3	0.796426	0.0388472	1	0.283401	0.359116							Rcc2	1.5014	0.0125341	1	0.109533	0.0612245	Zfp597	6.39844	0.0133238	1	0.106383	0.018018	Usp8	1.63827	0.000284197	1	0.343511	0.213675	Gbp9	0.640059	0.00308655	1	0.092233	0.194667	Kmt2e	1.39095	0.0420538	1	0.467532	0.324675							Pold4	1.97122
Gpd1l	0.730882	0.0390513	1	0.149798	0.21105							Mtfp1	0.63195	0.0126056	1	0.10142	0.154195	Itga5	3.47973	0.0133561	1	0.148936	0.036036	Snrnp200	1.61914	0.000285647	1	0.295165	0.162393	Vimp	0.716531	0.00308789	1	0.359223	0.506667	H2-DMb1	0.852001	0.0421501	1	0.753247	0.720779							Wdr83	2.42466
Tspan3	0.628748	0.0392042	1	0.0607287	0.106077							Mxd4	1.24568	0.0126414	1	0.350913	0.267574	Rp2	0.432923	0.0133838	1	0.170213	0.378378	Taok1	1.85812	0.000286051	1	0.29771	0.17094	Polr2d	0.528416	0.00312252	1	0.0970874	0.194667	Hip1	2.34361	0.0423594	1	0.155844	0.0714286							Cops4	0.416659
Paics	0.743296	0.0392849	1	0.202429	0.265193							Actr2	1.37228	0.0128941	1	0.308316	0.238095	Trappc13	0.259031	0.0133871	1	0.0638298	0.234234	Cys1	1.956	0.000287037	1	0.231552	0.111111	Abcb1b	0.414151	0.0031445	1	0.038835	0.112	Pknox1	2.74046	0.0425098	1	0.116883	0.0454545							Ndufa12	0.511333
Ebf1	1.03863	0.0393327	1	0.898785	0.901657							Hs6st1	1.3865	0.0131017	1	0.190669	0.126984	Tspan7	2.62568	0.0134455	1	0.212766	0.0720721	Abcc1	1.65567	0.000287499	1	0.284987	0.149573	Mrpl28	0.669571	0.00314878	1	0.23301	0.362667	Tsc22d4	1.55476	0.0426257	1	0.441558	0.344156							Romo1	0.601962
Tm9sf1	0.70088	0.0393424	1	0.105263	0.160221							Ehhadh	0.625112	0.0131107	1	0.105477	0.15873	Amigo2	3.87617	0.0134571	1	0.12766	0.027027	Txlna	2.47971	0.00028791	1	0.167939	0.0683761	Rbm3	1.07282	0.00315387	1	0.820388	0.832	Ap2m1	0.694157	0.0427107	1	0.402597	0.506494							Unc50	0.444727
Nmd3	1.51782	0.0393579	1	0.153846	0.107182							Ppp2r3a	1.2699	0.0131804	1	0.342799	0.265306	Rgs3	3.38742	0.0135057	1	0.191489	0.0630631	Gm10709	1.55252	0.000294757	1	0.287532	0.145299	Rabgap1l	2.83594	0.00317157	1	0.15534	0.0826667	0610012G03Rik	0.525426	0.0427208	1	0.142857	0.266234							Msi2	2.8437
Clcn4	0.663463	0.0394528	1	0.0688259	0.116022							Bmyc	1.46081	0.0132242	1	0.192698	0.131519	Alg3	3.24574	0.0135057	1	0.191489	0.0630631	Fdxr	2.15042	0.000295248	1	0.203562	0.0940171	Sf3a3	0.635745	0.00319117	1	0.121359	0.232	N4bp2l1	2.59009	0.0428746	1	0.142857	0.0649351							Pmpca	0.347234
Ndufb2	0.771172	0.0395948	1	0.198381	0.275138							Rlim	0.591119	0.0132913	1	0.10142	0.151927	Cdc42ep2	2.81136	0.0135468	1	0.234043	0.0900901	mt-Nd2	0.93846	0.000298776	1	0.994911	0.987179	Scamp2	0.740784	0.00319853	1	0.383495	0.517333	Orai1	0.328797	0.0429357	1	0.025974	0.103896							Relt	2.32628
Per1	1.42817	0.039794	1	0.226721	0.176796							Fam81a	1.27493	0.0133082	1	0.340771	0.258503	AW112010	2.67624	0.0135468	1	0.234043	0.0900901	Syne1	1.8963	0.000302661	1	0.208651	0.0940171	Cap1	0.835845	0.00321355	1	0.684466	0.781333	Tmed10	1.34053	0.0432037	1	0.571429	0.396104							Il16	0.533759
Rgs2	0.691285	0.0399548	1	0.125506	0.179006							Wdr83os	0.821737	0.0133159	1	0.401623	0.471655	Tmed9	0.690304	0.0135847	1	0.595745	0.81982	Nedd4l	1.5726	0.000303302	1	0.366412	0.217949	Abcg3	0.577192	0.00324077	1	0.0970874	0.197333	Sdcbp	0.718362	0.0434273	1	0.506494	0.616883							Rps12	1.04823
Chtf8	0.78881	0.0400653	1	0.206478	0.283978							Myzap	1.36622	0.0133382	1	0.111562	0.0634921	Prkch	2.26439	0.0135887	1	0.255319	0.0990991	Cspp1	1.77906	0.000303456	1	0.244275	0.119658	Ifih1	0.469241	0.00324477	1	0.0873786	0.181333	Mfap1b	2.2884	0.0435681	1	0.194805	0.103896							Nr4a2	0.53648
Atraid	0.733084	0.0400929	1	0.145749	0.209945							Tmem65	1.32039	0.0133786	1	0.330629	0.253968	Traf4	0.566278	0.0135942	1	0.276596	0.504505	Zfp944	3.77399	0.000303988	1	0.117048	0.034188	Pglyrp1	1.34624	0.00324756	1	0.529126	0.402667	Asxl2	0.309277	0.0438418	1	0.038961	0.123377							Tsg101	0.387599
Vkorc1	0.640581	0.0402469	1	0.0809717	0.129282							Abcd3	0.779122	0.013444	1	0.365112	0.424036	Dnm3	7.81802	0.0137271	1	0.106383	0.018018	Slc27a1	1.50977	0.000307333	1	0.417303	0.264957	Gm2a	0.857668	0.00327563	1	0.742718	0.816	Pcmtd1	0.390778	0.0438628	1	0.0519481	0.142857							Glod4	0.296327
Sh3glb1	1.1465	0.0402651	1	0.550607	0.507182							Slc40a1	0.564717	0.0135635	1	0.0872211	0.136054	Ttl	7.17984	0.0137271	1	0.106383	0.018018	Ube2s	2.02251	0.000309618	1	0.244275	0.123932	Frmd4b	0.448723	0.00328147	1	0.0436893	0.12	Rac3	2.07407	0.0439364	1	0.194805	0.103896							Poc1b	2.72878
Zfp1	1.81365	0.0404486	1	0.109312	0.0718232							Stxbp2	1.40644	0.013567	1	0.231237	0.165533	Parp12	4.6509	0.0137271	1	0.106383	0.018018	4933431E20Rik	3.49427	0.000310028	1	0.104326	0.025641	Lrwd1	0.551722	0.00331197	1	0.121359	0.224	Atp5o	1.352	0.0443715	1	0.493506	0.318182							Slc3a2	0.594878
Rps23	0.967634	0.0405142	1	0.94332	0.955801							1500026H17Rik	1.47654	0.013573	1	0.200811	0.138322	Ghitm	0.729057	0.0137834	1	0.680851	0.738739	Hnrnph1	1.44494	0.000316023	1	0.473282	0.316239	Sdhaf4	0.539613	0.00333357	1	0.0970874	0.194667	Frmd4b	1.5409	0.0446295	1	0.376623	0.246753							Ecd	0.294373
Mvb12a	0.742357	0.0405558	1	0.129555	0.19116							Nr1d2	1.55947	0.0136146	1	0.144016	0.0907029	Ly86	0.673991	0.0138411	1	0.531915	0.765766	H1f0	1.26307	0.000318097	1	0.791349	0.632479	Dym	0.559967	0.00334345	1	0.0825243	0.176	Fez2	1.80423	0.0446552	1	0.207792	0.11039							Vmp1	0.425801
Calm3	0.799506	0.0405676	1	0.263158	0.345856							Csrp2	0.817544	0.0136362	1	0.448276	0.492063	Stat4	6.31265	0.0141411	1	0.106383	0.018018	Rtkn	2.04188	0.000320664	1	0.254453	0.141026	Psmd14	0.648794	0.00334357	1	0.203883	0.328	4930453N24Rik	2.21778	0.0446659	1	0.168831	0.0844156							Tpm4	0.717276
Dctn1	0.726283	0.0407448	1	0.0809717	0.132597							Oaz1	0.943281	0.0137197	1	0.819473	0.820862	2700033N17Rik	5.35623	0.0141411	1	0.106383	0.018018	Kazn	2.04145	0.000321464	1	0.211196	0.0982906	Hmgcr	0.523201	0.00335462	1	0.11165	0.210667	Scyl1	2.03581	0.0446809	1	0.194805	0.103896							Capn15	2.79541
Txndc17	0.81789	0.0407549	1	0.287449	0.373481							Mfap3l	0.609439	0.0137237	1	0.139959	0.195011	Plekhg2	3.9589	0.0141411	1	0.106383	0.018018	Rnf185	2.20471	0.000322727	1	0.208651	0.0982906	Atp5b	0.829629	0.00335814	1	0.669903	0.757333	Serp1	1.33964	0.0446857	1	0.597403	0.415584							Fam129a	2.64364
Scyl1	0.66901	0.0408936	1	0.097166	0.150276							Taf6l	1.32398	0.0137262	1	0.334686	0.258503	Msn	1.34167	0.0141776	1	0.808511	0.72973	Mrpl50	1.48299	0.000324974	1	0.396947	0.24359	Cyb561d2	0.508092	0.0033621	1	0.0728155	0.16	Cd48	1.35056	0.0447175	1	0.558442	0.428571							Sft2d1	0.535606
Chkb	0.774704	0.0409853	1	0.226721	0.306077							Rsrp1	0.844824	0.013749	1	0.458418	0.53288	Prkar1a	1.35297	0.0141839	1	0.829787	0.747748	Klhdc3	1.94172	0.000325812	1	0.256997	0.136752	Nt5m	0.323118	0.00337415	1	0.0436893	0.117333	Dnaja1	0.541585	0.0447612	1	0.220779	0.344156							Stub1	0.669908
Prkx	1.71774	0.0412577	1	0.101215	0.0640884							Hsd17b14	0.627374	0.0138019	1	0.0973631	0.14966	Gata2	3.83189	0.0141868	1	0.12766	0.027027	Srrm2	1.38985	0.000326349	1	0.582697	0.423077	Sec11a	0.736712	0.00337733	1	0.315534	0.464	Chchd5	2.00438	0.0448719	1	0.155844	0.0714286							Kap	0.666867
Lat2	1.22749	0.0414038	1	0.40081	0.343646							Fkbp11	0.645385	0.0138235	1	0.196755	0.251701	Galnt18	3.07097	0.0141868	1	0.12766	0.027027	Cenpb	1.45118	0.000328028	1	0.412214	0.264957	Samd9l	0.513022	0.00343131	1	0.0873786	0.178667	Nxt1	1.84536	0.0450453	1	0.168831	0.0779221							B4galt3	2.25247
Wdr46	0.551171	0.0414441	1	0.0647773	0.107182							Ube2f	0.602123	0.0139467	1	0.131846	0.185941	Angptl6	4.17943	0.0141868	1	0.12766	0.027027	Epc1	1.78217	0.000329353	1	0.29771	0.166667	Tspan17	0.436503	0.00347423	1	0.0485437	0.125333	Lmna	1.90295	0.0450453	1	0.168831	0.0779221							Cdc40	0.380425
Prmt1	0.803584	0.0414786	1	0.238866	0.320442							Farp1	1.55031	0.0139805	1	0.144016	0.0907029	Arhgap23	4.40498	0.0141868	1	0.12766	0.027027	Gca	1.60343	0.000329681	1	0.399491	0.252137	Fars2	0.50167	0.00348208	1	0.0776699	0.170667	Fkbp15	2.0345	0.0450571	1	0.194805	0.103896							Atp13a2	2.55457
Ttpal	0.743338	0.0415692	1	0.153846	0.21547							Ppdpf	0.807066	0.0140765	1	0.356998	0.417234	Tgm2	3.84724	0.0142112	1	0.234043	0.0990991	Zfp710	3.72819	0.000330067	1	0.122137	0.0384615	Ccdc134	0.443358	0.00348523	1	0.0339806	0.104	Mast3	2.21154	0.0450721	1	0.168831	0.0844156							Tmem230	0.322156
Rps27l	0.78005	0.0416657	1	0.230769	0.299448							Cdv3	1.37709	0.0141372	1	0.271805	0.204082	Rpp30	2.87267	0.0142112	1	0.234043	0.0990991	Set	1.43531	0.000336435	1	0.483461	0.320513	Lat2	0.667825	0.00349111	1	0.286408	0.413333	Supt5	1.56522	0.0451285	1	0.311688	0.194805							Ddx47	0.534522
Rps14	0.979636	0.0416863	1	0.963563	0.967956							A430005L14Rik	0.612804	0.0141849	1	0.0811359	0.129252	Samsn1	0.615529	0.0142161	1	0.382979	0.603604	Chd4	1.36026	0.000337096	1	0.587786	0.423077	Renbp	0.564636	0.00349673	1	0.106796	0.205333	Sfpq	1.85852	0.0451898	1	0.25974	0.162338							Ppdpf	1.58308
Timp3	0.637272	0.0418887	1	0.121457	0.172376							Rpl7a	0.924049	0.0142065	1	0.756592	0.789116	1810009A15Rik	1.98761	0.0143187	1	0.446809	0.279279	Setd3	1.50417	0.000340289	1	0.450382	0.299145	Smpdl3a	1.19669	0.00354084	1	0.723301	0.672	Eef2	0.978536	0.0453616	1	0.961039	0.902597							Ncr1	0.863895
Fbl	0.780203	0.0419434	1	0.238866	0.310497							Ptgr2	0.726194	0.0143039	1	0.237323	0.297052	Stk10	2.28053	0.0143552	1	0.297872	0.144144	Wnk4	1.23449	0.000344115	1	0.811705	0.679487	Gps1	0.686858	0.00354589	1	0.208738	0.338667	Tmem127	1.64022	0.0453899	1	0.207792	0.11039							Znhit6	2.20445
Smek2	0.744856	0.0420014	1	0.202429	0.269613							Usf2	1.31512	0.0143539	1	0.231237	0.160998	Eif4a2	0.680715	0.014421	1	0.531915	0.720721	Ezr	1.23087	0.00035468	1	0.80916	0.67094	Snx5	0.74729	0.00354775	1	0.427184	0.536	Pla2g7	1.39119	0.0456849	1	0.519481	0.402597							Map3k11	0.301042
Eif4h	0.789146	0.0420266	1	0.279352	0.352486							Minos1	0.921156	0.0145279	1	0.807302	0.854875	Aldh3b1	0.452681	0.014447	1	0.148936	0.351351	Dusp15	0.649275	0.000356759	1	0.356234	0.478632	Mrps12	0.705797	0.00361925	1	0.203883	0.328	Usp12	3.22147	0.0457846	1	0.103896	0.038961							1110004F10Rik	0.560318
Taz	0.763824	0.0421359	1	0.194332	0.267403							Pcgf2	1.49778	0.0145996	1	0.156187	0.102041	Ikzf1	0.599394	0.0144794	1	0.340426	0.54955	Rhot2	1.62353	0.000360434	1	0.330789	0.192308	G3bp2	0.750083	0.00363061	1	0.398058	0.541333	Rab4b	1.58087	0.0459213	1	0.337662	0.233766							Klf13	0.421543
Phc3	1.71785	0.0423715	1	0.105263	0.0685083							Sdc2	0.624243	0.014606	1	0.119675	0.170068	Sdc2	0.142332	0.0145596	1	0.0425532	0.189189	Inpp5j	1.41845	0.000362293	1	0.516539	0.363248	Rps21	1.00756	0.0036838	1	0.834951	0.874667	Pole3	0.19896	0.0459761	1	0.038961	0.116883							Wdr6	2.58426
Eef1g	0.887945	0.0424301	1	0.62753	0.695028							Pnkd	0.878904	0.0148711	1	0.608519	0.653061	Osmr	3.61374	0.0145645	1	0.12766	0.027027	Chp1	1.37697	0.000363222	1	0.587786	0.457265	Wwp2	0.658294	0.00370806	1	0.169903	0.290667	Lcorl	2.35994	0.0460125	1	0.116883	0.0454545							Nipsnap3b	0.481935
Sec23b	0.702578	0.0425037	1	0.0769231	0.128177							Tram1	1.27908	0.0149497	1	0.292089	0.21542	Zbtb46	5.01431	0.0145661	1	0.106383	0.018018	Gsk3b	1.71834	0.000367775	1	0.3257	0.196581	Mapk1	0.703712	0.00371133	1	0.26699	0.402667	Larp7	1.84925	0.0460371	1	0.181818	0.0909091							Tmem185b	0.198359
Psmc1	0.776959	0.042513	1	0.17004	0.240884							Rnf128	0.745998	0.015001	1	0.261663	0.324263	Rasgrp4	7.77091	0.0145661	1	0.106383	0.018018	Ggnbp2	1.52897	0.000369173	1	0.447837	0.307692	Thrap3	0.702387	0.00371394	1	0.300971	0.445333	Asgr2	3.57913	0.0463355	1	0.103896	0.038961							Golga3	2.46498
Gars	0.755312	0.0426154	1	0.129555	0.18895							Tkt	0.817479	0.0151298	1	0.365112	0.435374	Npat	5.88441	0.0145661	1	0.106383	0.018018	Kpna6	1.97716	0.000369303	1	0.226463	0.111111	Ldha	0.83356	0.00372838	1	0.665049	0.749333	Rexo4	2.50011	0.0464342	1	0.142857	0.0649351							Hprt	0.56091
Nol11	1.6209	0.0426332	1	0.129555	0.0883978							Cmtm8	1.31479	0.0151455	1	0.27789	0.201814	Myg1	0.381964	0.0145722	1	0.0425532	0.207207	Paxbp1	2.3249	0.00037225	1	0.195929	0.0897436	Cbr3	0.432173	0.00373387	1	0.0631068	0.144	Zfp326	2.65134	0.0464342	1	0.142857	0.0649351							Psmc6	0.498009
Gps2	0.799045	0.0426829	1	0.259109	0.329282							Gucd1	0.64914	0.0152821	1	0.103448	0.156463	Pi16	1.96916	0.0147076	1	0.297872	0.135135	Oxr1	2.47492	0.000376437	1	0.183206	0.0811966	Sri	0.769934	0.00378218	1	0.480583	0.621333	Snx20	1.49252	0.0467653	1	0.38961	0.292208							Scaf1	0.36884
Tarbp2	0.647115	0.0427469	1	0.0647773	0.109392							Nsrp1	1.48423	0.0153001	1	0.125761	0.0770975	Zbtb21	0.18654	0.0148117	1	0.0425532	0.189189	Rab5b	1.48099	0.000376513	1	0.458015	0.311966	Inpp5b	0.499013	0.00380625	1	0.0679612	0.152	Ep300	2.07648	0.04715	1	0.168831	0.0844156							Bccip	0.480333
Cd53	0.835812	0.0429099	1	0.421053	0.514917							Hcfc1	1.61099	0.0153798	1	0.127789	0.0793651	Dhrs3	2.81657	0.0148167	1	0.234043	0.0900901	Rps3a1	0.929631	0.00037726	1	0.916031	0.910256	Pmpca	0.607816	0.0038289	1	0.106796	0.205333	Mtmr2	1.8772	0.0472559	1	0.181818	0.0909091							Lactb2	2.38436
Rlim	0.742446	0.0429146	1	0.202429	0.270718							Jade1	1.3119	0.0154206	1	0.251521	0.179138	Cpsf7	0.352351	0.0149386	1	0.0638298	0.234234	Lsm7	1.47076	0.000378503	1	0.455471	0.299145	Ctns	0.320665	0.00386276	1	0.0339806	0.101333	Rad23b	1.6324	0.0473088	1	0.220779	0.123377							Apoa1bp	0.432964
Bnip3	1.49317	0.0429558	1	0.174089	0.130387							Ccdc189	1.36983	0.0154684	1	0.196755	0.136054	AF251705	0.361949	0.0149722	1	0.12766	0.315315	Casz1	1.71062	0.000382719	1	0.282443	0.153846	D8Ertd738e	0.837235	0.00389388	1	0.723301	0.826667	Mdfic	2.60383	0.047362	1	0.142857	0.0649351							Mad2l1bp	0.214635
Amacr	0.504917	0.0431507	1	0.0647773	0.106077							Scnn1a	0.883066	0.0155372	1	0.630832	0.648526	Hivep2	4.50141	0.0150023	1	0.106383	0.018018	Copa	1.38129	0.000383473	1	0.521628	0.346154	Glo1	0.73692	0.00391516	1	0.354369	0.498667	Sirt2	1.66046	0.0473899	1	0.311688	0.201299							Gm42418	1.04233
Gpbp1l1	0.749148	0.043309	1	0.121457	0.179006							Fnta	0.70903	0.0156409	1	0.156187	0.217687	Myh9	1.56126	0.0152165	1	0.659574	0.522523	Fyttd1	1.76707	0.000384258	1	0.284987	0.15812	Ptcd2	0.556911	0.00395477	1	0.0970874	0.192	Dhx8	3.55955	0.0474543	1	0.103896	0.038961							Ncdn	2.25502
Lsm4	0.824896	0.0433147	1	0.319838	0.405525							Isyna1	1.18527	0.0157359	1	0.576065	0.492063	Pttg1ip	1.71695	0.0152814	1	0.553191	0.423423	Angptl8	2.87302	0.000391667	1	0.142494	0.0512821	Dhx58	0.492455	0.0039564	1	0.11165	0.205333	Jak1	1.69461	0.0474678	1	0.337662	0.227273							Srcap	2.24582
Mia3	0.736697	0.0433165	1	0.11336	0.170166							Scaf8	1.50826	0.0157907	1	0.115619	0.0680272	Unc5b	2.85776	0.0153467	1	0.12766	0.027027	Ube2f	1.63094	0.000395101	1	0.356234	0.217949	Cd177	1.77039	0.0039892	1	0.305825	0.218667	Mfng	1.79167	0.0474935	1	0.220779	0.123377							Tusc3	1.72275
Gtf2h5	0.769995	0.0433736	1	0.178138	0.248619							Ank2	1.27862	0.0158971	1	0.290061	0.21542	Ago3	0.173904	0.0153573	1	0.0212766	0.162162	Tomm20	1.26008	0.000395399	1	0.727735	0.611111	Csnk1g3	0.440751	0.00403338	1	0.038835	0.109333	Cfp	0.261029	0.0478317	1	0.038961	0.116883							App	2.36728
Ptprcap	0.886638	0.043408	1	0.639676	0.718232							Pcbd1	1.08665	0.0159457	1	0.795132	0.770975	Rad9a	0.168458	0.0153573	1	0.0212766	0.162162	Cited4	2.26649	0.000395821	1	0.19084	0.0854701	Grpel1	0.758459	0.00403686	1	0.300971	0.453333	Hsd17b12	1.48702	0.047916	1	0.311688	0.194805							Wwp1	3.70366
Gimap6	0.914324	0.0435022	1	0.765182	0.823204							Slc35e4	1.68279	0.0159801	1	0.133874	0.0861678	Gemin5	4.12637	0.01545	1	0.106383	0.018018	Cpeb4	1.9658	0.000401021	1	0.211196	0.0982906	Ndufb2	0.749027	0.00404323	1	0.368932	0.514667	Myd88	1.56433	0.0481595	1	0.324675	0.214286							Actr2	0.710127
5031425E22Rik	0.791055	0.0435619	1	0.251012	0.319337							Vps13c	1.82033	0.0161404	1	0.10142	0.0589569	Rnf113a2	0.430913	0.0154832	1	0.191489	0.396396	Irx3	1.63857	0.000401926	1	0.310433	0.175214	Arhgap1	0.661415	0.00411995	1	0.194175	0.314667	Tmem181a	1.95981	0.0481866	1	0.220779	0.12987							Cuta	0.584597
Akap13	1.13305	0.0436353	1	0.554656	0.511602							Ndufa2	1.05867	0.0161841	1	0.880325	0.861678	Hmgb1	1.19343	0.0155268	1	0.957447	0.891892	Ephb4	1.72131	0.00040287	1	0.287532	0.15812	Tomm40l	0.465639	0.00413029	1	0.038835	0.109333	Zswim6	3.26846	0.0485956	1	0.103896	0.038961							Naa38	1.60534
Ccdc59	0.784411	0.0438514	1	0.17004	0.237569							Pvalb	0.967929	0.0162622	1	0.941176	0.952381	Fgr	0.641563	0.015553	1	0.382979	0.63964	Eef1a1	0.972908	0.000403185	1	0.982188	0.957265	Tbc1d22a	0.593116	0.00413372	1	0.11165	0.210667	Plgrkt	2.37889	0.0487829	1	0.142857	0.0649351							Atp6v1e1	0.573798
Pik3ap1	0.762168	0.0441719	1	0.165992	0.236464							Sdhd	0.874144	0.0163194	1	0.628803	0.678005	Dock1	4.07344	0.0155617	1	0.170213	0.0540541	Dusp4	3.42258	0.000403987	1	0.122137	0.0384615	Plekho1	0.695727	0.00414188	1	0.252427	0.365333	Ccl9	1.64013	0.0491928	1	0.220779	0.116883							Psmc3	0.724575
Cnppd1	0.786363	0.0442913	1	0.214575	0.286188							2610528J11Rik	0.714945	0.016514	1	0.237323	0.292517	Rprd1a	4.18038	0.0155617	1	0.170213	0.0540541	Trappc2l	1.41752	0.000404095	1	0.524173	0.367521	H2-T22	0.675231	0.00414382	1	0.26699	0.397333	Fmo1	2.41106	0.0492644	1	0.142857	0.0649351							Dap3	2.75682
Nfkbib	0.764291	0.044831	1	0.174089	0.240884							1110065P20Rik	1.38737	0.016636	1	0.227181	0.160998	Fdps	0.651557	0.0156203	1	0.489362	0.675676	Cyb5b	1.38062	0.000410258	1	0.564885	0.405983	Ticam1	0.384391	0.00414431	1	0.038835	0.109333	Tmem160	1.57978	0.0492964	1	0.311688	0.201299							Supt5	0.540687
Ttc5	0.725622	0.0449015	1	0.149798	0.207735							Mrpl37	0.737983	0.0166913	1	0.30426	0.353741	Wwtr1	4.12346	0.0158949	1	0.170213	0.0540541	Amotl2	1.54845	0.000412561	1	0.374046	0.235043	Coa7	0.339303	0.0041749	1	0.0339806	0.101333	Gpr183	1.45396	0.049354	1	0.402597	0.279221							Rpf1	2.10458
Pglyrp1	0.725269	0.0449658	1	0.149798	0.212155							Ash1l	1.32558	0.0167692	1	0.273834	0.204082	Nrep	3.47179	0.0159094	1	0.106383	0.018018	Mtcl1	1.76324	0.00041262	1	0.251908	0.132479	Scd2	0.419037	0.00418962	1	0.0339806	0.101333	Slu7	1.66903	0.0495048	1	0.246753	0.149351							Surf4	1.60762
Hacd2	0.637741	0.0452761	1	0.0769231	0.124862							Crat	0.7711	0.0167868	1	0.377282	0.417234	Sub1	0.812321	0.0159506	1	0.829787	0.891892	Tjp1	2.28928	0.000417067	1	0.193384	0.0897436	Phkg2	0.663247	0.00419134	1	0.101942	0.202667	Psmb2	1.38656	0.0496118	1	0.467532	0.337662							Klra9	0.258351
Pdcd4	1.54249	0.0453055	1	0.137652	0.0950276							Stard3	1.73519	0.0168154	1	0.107505	0.0634921	Psme1	0.843076	0.0159796	1	0.829787	0.90991	Irak1	1.81581	0.000418293	1	0.256997	0.132479	B2m	0.925821	0.00422901	1	0.868932	0.866667	Upf3b	2.97401	0.0497599	1	0.103896	0.038961							Nomo1	2.23665
Ran	0.841192	0.0455564	1	0.425101	0.506077							Ubr3	1.36272	0.0168184	1	0.229209	0.165533	Plekha2	0.354307	0.0160162	1	0.106383	0.288288	Dvl1	1.90755	0.000426022	1	0.284987	0.166667	Slpi	1.71084	0.00423701	1	0.320388	0.224	Armc8	3.36418	0.0497599	1	0.103896	0.038961							Tti1	2.5208
Fcrla	0.852734	0.0456531	1	0.453441	0.521547							Atp5f1	0.94523	0.0169455	1	0.855984	0.870748	Slc38a1	0.618798	0.0161635	1	0.361702	0.630631	Scrib	2.1187	0.000427933	1	0.195929	0.0897436	Clec10a	0.596359	0.0042445	1	0.0825243	0.170667	Akap8	2.05847	0.0498689	1	0.246753	0.155844							Mbip	2.3833
Atg101	0.778193	0.0457576	1	0.202429	0.271823							Efna5	1.65732	0.0170139	1	0.11359	0.0680272	Efnb2	2.53283	0.0161656	1	0.12766	0.027027	Prpf8	1.43995	0.000428331	1	0.475827	0.316239	Actr10	0.716354	0.00424588	1	0.281553	0.416													Pigv	2.62652
Lims1	0.74412	0.0457621	1	0.117409	0.177901							Myo10	1.26746	0.0171068	1	0.344828	0.265306	Gbf1	2.27829	0.0161701	1	0.361702	0.207207	Uba3	1.90617	0.00043745	1	0.193384	0.0854701	Fxyd5	0.889538	0.00428973	1	0.834951	0.882667													Rexo2	0.53905
Stat4	1.43536	0.0457803	1	0.194332	0.144751							2010107E04Rik	1.04539	0.0172498	1	0.89858	0.884354	Raph1	3.67583	0.0162344	1	0.170213	0.0540541	Zfp36	1.38608	0.000442306	1	0.564885	0.405983	Unc119	1.60903	0.00429999	1	0.330097	0.234667													Pigt	0.59122
Erlin1	0.641126	0.0460133	1	0.0647773	0.109392							Cyc1	0.932564	0.017421	1	0.823529	0.839002	Lyst	0.325356	0.0162708	1	0.0851064	0.252252	Tmem65	1.66952	0.000444287	1	0.256997	0.132479	Lta4h	0.607957	0.0043106	1	0.194175	0.306667
BC028528	0.665684	0.0460175	1	0.0850202	0.132597							Ilk	1.3432	0.0174242	1	0.292089	0.226757	Adam15	3.22853	0.0163914	1	0.276596	0.135135	Kif1bp	2.44637	0.000447754	1	0.195929	0.0940171	Eif3a	0.780956	0.00431966	1	0.441748	0.605333
Nabp2	0.721771	0.0461433	1	0.121457	0.175691							Slc5a3	1.20553	0.0174682	1	0.377282	0.290249	Erh	1.33541	0.0164439	1	0.744681	0.621622	Mtx1	1.44902	0.000464357	1	0.40458	0.264957	Nampt	0.625204	0.00432387	1	0.140777	0.250667
Gpr171	0.834218	0.0463239	1	0.336032	0.420994							Adgrg1	1.32733	0.0175333	1	0.229209	0.160998	Prpf19	1.92735	0.0164951	1	0.446809	0.297297	Gm12216	3.48899	0.000465717	1	0.137405	0.0512821	Tssc4	0.44879	0.00433072	1	0.0533981	0.130667
Nxpe3	1.42147	0.0464465	1	0.186235	0.140331							Spsb3	0.62262	0.0175849	1	0.107505	0.15873	Aplp2	2.10596	0.0165286	1	0.382979	0.225225	Ralbp1	1.44418	0.000469066	1	0.468193	0.320513	Gclm	0.714226	0.00435583	1	0.145631	0.264
Faf1	0.663243	0.0465578	1	0.0728745	0.119337							Gm11273	1.38637	0.0176328	1	0.115619	0.0680272	Zkscan17	3.02438	0.0165339	1	0.212766	0.0810811	Ckmt1	1.27881	0.000470439	1	0.73028	0.576923	Serp1	0.852514	0.00438466	1	0.674757	0.744
Josd2	0.69377	0.0466306	1	0.097166	0.149171							Aco2	0.928063	0.0176423	1	0.829615	0.866213	Spata6	4.77264	0.0165802	1	0.170213	0.0540541	Ptprd	1.86068	0.000474659	1	0.236641	0.119658	Slc35a4	0.654466	0.00442257	1	0.126214	0.232
Fam134c	0.781158	0.0466645	1	0.190283	0.258564							Prdm16	1.60053	0.01771	1	0.137931	0.0884354	Cd53	0.643679	0.0167232	1	0.425532	0.630631	4930402H24Rik	1.48137	0.000474661	1	0.407125	0.25641	Gosr2	0.677294	0.00443676	1	0.223301	0.352
Trim25	1.33152	0.0466976	1	0.287449	0.238674							Pgap1	1.40304	0.0177132	1	0.192698	0.133787	Tubb2a	0.712882	0.016773	1	0.574468	0.765766	Cpox	1.93562	0.000476025	1	0.19084	0.0854701	Cab39l	0.511319	0.0044445	1	0.092233	0.184
Dhx8	0.648938	0.0467335	1	0.0607287	0.103867							Psmg1	0.676829	0.0177371	1	0.123732	0.176871	Idh1	0.58984	0.0168232	1	0.340426	0.576577	Atf4	1.49011	0.000477712	1	0.496183	0.376068	Morf4l2	0.686518	0.00450542	1	0.247573	0.386667
Impa1	0.723882	0.0467875	1	0.109312	0.162431							Eif4a2	0.837006	0.017834	1	0.517241	0.544218	Rell1	0.699282	0.0168364	1	0.553191	0.747748	Plekhf2	1.68133	0.000484294	1	0.26972	0.141026	Dnajb1	0.693706	0.00452507	1	0.305825	0.437333
Umad1	1.51803	0.0468184	1	0.109312	0.0707182							Smarca4	1.23154	0.0178744	1	0.302231	0.222222	Xbp1	0.773615	0.0168395	1	0.723404	0.801802	Acat1	0.932927	0.000484842	1	0.905852	0.82906	Pygo2	0.560755	0.00454047	1	0.0873786	0.178667
Grk6	0.789349	0.047122	1	0.238866	0.309392							Atp6v1h	0.77589	0.0180206	1	0.324544	0.380952	Plaur	0.685449	0.0168614	1	0.531915	0.72973	Emd	1.72477	0.000490944	1	0.318066	0.188034	Grcc10	0.816403	0.0045533	1	0.592233	0.701333
Prmt3	0.686788	0.0473082	1	0.0728745	0.119337							Stx16	1.39711	0.018123	1	0.103448	0.0589569	Snrnp27	0.522371	0.0168817	1	0.297872	0.477477	Spsb3	1.83879	0.000493487	1	0.251908	0.132479	Ctr9	0.451639	0.00457238	1	0.0485437	0.122667
Mrfap1	0.827839	0.0474511	1	0.348178	0.41547							Nipal3	1.32867	0.0181738	1	0.255578	0.183673	Ift43	3.09814	0.0169325	1	0.170213	0.0540541	Ankrd9	1.67126	0.000495837	1	0.340967	0.213675	Sbds	0.733367	0.00457524	1	0.247573	0.386667
Cers5	0.65523	0.0477236	1	0.0931174	0.141436							Hmgn1	0.859366	0.0182534	1	0.525355	0.555556	Fcrla	0.501859	0.0170098	1	0.255319	0.432432	Atp6v1f	1.16099	0.000498482	1	0.954198	0.850427	Ldhb	1.49462	0.00459947	1	0.315534	0.210667
Fzr1	0.635918	0.0478984	1	0.0769231	0.123757							Nrp1	1.36972	0.0182879	1	0.188641	0.129252	Bambi	2.51707	0.0170673	1	0.234043	0.0900901	Pdap1	1.42702	0.00050972	1	0.506361	0.346154	Pgap2	0.632687	0.00461319	1	0.150485	0.256
Wdr82	0.70718	0.0479936	1	0.109312	0.161326							Mrpl13	0.752491	0.0183317	1	0.247465	0.306122	Arl8b	0.482713	0.017206	1	0.212766	0.414414	Gm16685	2.4861	0.00051614	1	0.180662	0.0811966	Bet1l	0.646273	0.0046837	1	0.116505	0.218667
Rplp0	1.01702	0.048119	1	0.97166	0.971271							Smim1	0.690276	0.0184605	1	0.162272	0.217687	Atp6v1d	0.651582	0.0172162	1	0.446809	0.684685	Ptpn23	2.04007	0.000519214	1	0.226463	0.115385	Exosc8	0.63642	0.00470578	1	0.116505	0.221333
Rps19	1.00295	0.0481568	1	0.959514	0.981215							Coprs	0.711857	0.0184781	1	0.162272	0.219955	Hsd11b1	0.296831	0.0172598	1	0.106383	0.27027	Lmo4	1.49731	0.000522208	1	0.412214	0.269231	Fh1	0.595722	0.00472841	1	0.203883	0.312
Tmem160	0.740409	0.0482446	1	0.174089	0.235359							Nt5c3	0.609904	0.018499	1	0.0831643	0.129252	Ick	3.72016	0.0172913	1	0.170213	0.0540541	Ctbp1	1.69862	0.000522244	1	0.318066	0.192308	Coa3	0.729834	0.00473719	1	0.291262	0.437333
Rnf31	0.661596	0.0482975	1	0.0688259	0.113812							Cox6c	1.00718	0.0185544	1	0.959432	0.975057	Sh3bp5	2.54878	0.0175016	1	0.297872	0.144144	Wdr26	1.63948	0.000522631	1	0.330789	0.205128	Derl1	0.740487	0.00477154	1	0.383495	0.512
Nelfcd	0.61547	0.0483133	1	0.0728745	0.117127							Psma7	1.15927	0.0186014	1	0.636917	0.553288	Mlxip	2.41373	0.0175156	1	0.191489	0.0630631	Mvb12a	1.36913	0.000537851	1	0.592875	0.440171	Tor2a	0.599933	0.00477379	1	0.169903	0.274667
Stk11	0.723341	0.0483796	1	0.109312	0.162431							Zfp87	1.38386	0.0186355	1	0.212982	0.151927	Mfge8	2.42043	0.0176598	1	0.340426	0.189189	Sod1	1.58136	0.000538524	1	0.366412	0.226496	Ak6	0.696731	0.00478451	1	0.257282	0.389333
Inadl	1.65153	0.0487981	1	0.105263	0.0685083							Rab14	0.852883	0.0186831	1	0.517241	0.548753	Ostm1	0.449207	0.0176938	1	0.170213	0.378378	Ube3b	1.78989	0.000539129	1	0.274809	0.153846	Unc93b1	0.840232	0.00478846	1	0.674757	0.741333
Siglecg	1.12505	0.0488132	1	0.623482	0.559116							Dedd2	1.63327	0.0187526	1	0.119675	0.0748299	Nde1	1.92487	0.0177598	1	0.382979	0.216216	Rps9	0.975124	0.000555123	1	0.936387	0.863248	Gm14548	0.577448	0.00480482	1	0.101942	0.194667
Ylpm1	1.65279	0.0491663	1	0.129555	0.0895028							Tmc4	1.26564	0.0188121	1	0.178499	0.117914	Fmo1	2.90799	0.0177891	1	0.212766	0.0810811	Trim8	1.47622	0.000558891	1	0.368957	0.230769	H2-Q7	0.596492	0.00481796	1	0.0970874	0.189333
Inmt	0.536937	0.0492777	1	0.0607287	0.100552							Mettl9	0.81563	0.018877	1	0.350913	0.412698	Tfrc	0.414679	0.0178987	1	0.12766	0.306306	Ythdc1	1.81902	0.000560637	1	0.290076	0.17094	Cope	0.788308	0.00486279	1	0.5	0.626667
Ddx17	0.738085	0.0493337	1	0.121457	0.176796							Lhx1os	0.718971	0.0189072	1	0.229209	0.287982	Rffl	3.59969	0.018029	1	0.170213	0.0540541	Fermt1	1.47121	0.000572789	1	0.427481	0.286325	Rbm17	0.708077	0.00488557	1	0.223301	0.362667
Mrps9	0.665067	0.0495551	1	0.0769231	0.123757							Ncoa6	1.56135	0.0189182	1	0.105477	0.0612245	Cryzl1	2.99452	0.018029	1	0.170213	0.0540541	Iscu	1.16857	0.000576227	1	0.888041	0.786325	Trpv2	0.687219	0.00491858	1	0.203883	0.322667
Htatsf1	0.686018	0.049628	1	0.105263	0.154696							Riok3	0.713404	0.0189226	1	0.154158	0.210884	9930021J03Rik	3.36644	0.018029	1	0.170213	0.0540541	Cdo1	1.36375	0.000577124	1	0.554707	0.393162	Zfp36l2	1.1446	0.00494029	1	0.81068	0.789333
Ninj1	0.651325	0.0497642	1	0.109312	0.156906							Wdr18	0.58462	0.0190335	1	0.111562	0.15873	Ext2	1.9164	0.0181617	1	0.404255	0.252252	Trappc6a	1.48326	0.000586549	1	0.412214	0.269231	Dap3	0.631153	0.00494365	1	0.131068	0.234667
Nudt19	0.614779	0.0497769	1	0.121457	0.171271							Mrps7	0.771643	0.0191022	1	0.318458	0.37415	Tsn	1.53409	0.018168	1	0.553191	0.432432	Tns2	1.7116	0.000587538	1	0.295165	0.17094	Creld2	0.560966	0.00495856	1	0.126214	0.224
Fdps	0.672563	0.0498428	1	0.0688259	0.113812							Rrbp1	1.35935	0.0192289	1	0.334686	0.272109	Icam2	2.53451	0.0182473	1	0.276596	0.126126	Msl2	2.83753	0.000587745	1	0.127226	0.042735	Kras	0.67938	0.00497273	1	0.208738	0.336
Bod1l	0.72391	0.0498457	1	0.0890688	0.140331							Aif1l	0.884891	0.0193124	1	0.616633	0.646259	Runx3	0.438312	0.0183936	1	0.170213	0.351351	Sin3a	2.80051	0.000588905	1	0.160305	0.0683761	Tgif1	0.708373	0.00497615	1	0.237864	0.362667
H13	0.747979	0.0498517	1	0.186235	0.250829							Mt3	0.691826	0.0193266	1	0.0892495	0.138322	Pfkfb3	3.24144	0.0184081	1	0.170213	0.0540541	Krt7	1.19842	0.000589858	1	0.888041	0.764957	Arhgef1	1.22165	0.004992	1	0.708738	0.658667
Blmh	0.667944	0.0499071	1	0.0850202	0.131492							mt-Nd5	1.03594	0.0193571	1	0.965517	0.963719	Paqr5	0.573942	0.0184313	1	0.297872	0.522523	Mafk	2.06058	0.000590195	1	0.208651	0.102564	Ube2r2	1.51357	0.00500759	1	0.373786	0.301333
Arl8b	0.692122	0.0499934	1	0.097166	0.148066							Hip1r	1.50266	0.0193936	1	0.1643	0.111111	Evi2a	0.663807	0.018541	1	0.468085	0.675676	Rnpepl1	1.67906	0.000590442	1	0.307888	0.179487	Reep5	0.8256	0.00501711	1	0.616505	0.744
												Bicc1	1.24654	0.0193996	1	0.391481	0.315193	Mrpl54	0.660561	0.0185671	1	0.468085	0.657658	Deptor	1.33607	0.000592842	1	0.521628	0.388889	Rbbp8	0.570118	0.0050317	1	0.106796	0.202667
												Gigyf1	1.49283	0.0195087	1	0.15213	0.0997732	Adprh	0.424187	0.0186046	1	0.12766	0.333333	Ubap1	2.01575	0.000594233	1	0.203562	0.0982906	Srpr	0.729639	0.00503922	1	0.286408	0.432
												Tnks2	1.36857	0.0196913	1	0.139959	0.0884354	Foxn3	2.12832	0.018628	1	0.404255	0.252252	Tubb4b	1.44627	0.000594747	1	0.56743	0.440171	Zpr1	0.591762	0.00510032	1	0.160194	0.269333
												Got2	0.892629	0.0199292	1	0.649087	0.675737	Fig4	0.229327	0.0187664	1	0.0425532	0.189189	Pak4	1.71522	0.000595601	1	0.274809	0.153846	Rpn2	0.758041	0.00510561	1	0.42233	0.568
												Slc7a8	1.33957	0.0199458	1	0.139959	0.0884354	1810032O08Rik	3.25795	0.0187941	1	0.170213	0.0540541	Gm17750	1.35452	0.000598078	1	0.575064	0.410256	Rap1b	1.15616	0.00511101	1	0.781553	0.754667
												Lrrn1	1.45506	0.019965	1	0.107505	0.0634921	Mkl2	3.09657	0.0187941	1	0.170213	0.0540541	Ip6k2	1.45379	0.000608306	1	0.46056	0.307692	Mmadhc	0.564251	0.00512043	1	0.0970874	0.189333
												Wsb2	1.26768	0.0200443	1	0.225152	0.15873	Mgmt	0.420207	0.0188162	1	0.12766	0.315315	Slc25a1	1.55626	0.000608664	1	0.424936	0.286325	Runx1	0.701055	0.00513028	1	0.300971	0.432
												Rhoa	0.853078	0.0202257	1	0.478702	0.519274	Hmgcr	0.595643	0.0188476	1	0.297872	0.522523	Gpam	2.73695	0.000610299	1	0.137405	0.0512821	Pkib	0.403105	0.00514581	1	0.0679612	0.146667
												Plekha3	1.52112	0.0204041	1	0.115619	0.0702948	Cnih1	0.566468	0.0189037	1	0.255319	0.459459	Eif3b	1.65169	0.000619424	1	0.305344	0.183761	H2-D1	0.941008	0.00516818	1	0.946602	0.965333
												Rpl21	1.09137	0.0204046	1	0.845842	0.802721	Gm26947	0.143023	0.0190682	1	0.0212766	0.153153	Dennd1b	1.95875	0.000624829	1	0.13486	0.0470085	Fasn	0.450823	0.00517119	1	0.0533981	0.128
												Maged1	1.22337	0.0204358	1	0.361055	0.287982	Surf1	0.49916	0.0191092	1	0.212766	0.441441	Ccbl1	1.49891	0.000625681	1	0.409669	0.273504	Flad1	0.463648	0.00519679	1	0.0582524	0.136
												Dld	0.858324	0.0205018	1	0.53144	0.562358	Uchl3	0.620178	0.0191333	1	0.297872	0.567568	mt-Atp8	0.953115	0.000628032	1	0.997455	1	Zfr	0.628201	0.00519718	1	0.140777	0.245333
												Rufy3	1.44002	0.0206722	1	0.135903	0.0861678	Tmem234	1.39352	0.0191646	1	0.765957	0.648649	Sart1	2.18994	0.000640597	1	0.19084	0.0897436	Mrpl17	0.69875	0.00523414	1	0.252427	0.373333
												Ip6k1	1.34519	0.0206857	1	0.198783	0.138322	Csrnp1	0.525262	0.0191652	1	0.319149	0.513514	Trim28	1.64941	0.00064265	1	0.302799	0.17094	Sdf2	0.717929	0.00524612	1	0.252427	0.381333
												Btbd6	1.47299	0.0207415	1	0.129817	0.0816327	Tmem55b	0.546	0.0193202	1	0.276596	0.477477	L3hypdh	2.57843	0.00064291	1	0.180662	0.0854701	Tnip3	0.4198	0.00528469	1	0.038835	0.106667
												Got1	0.842596	0.0208062	1	0.513185	0.535147	Babam1	0.526574	0.0193444	1	0.234043	0.468468	Pkp2	1.70678	0.000643278	1	0.231552	0.119658	Tmem14c	0.820576	0.00530996	1	0.582524	0.674667
												Hspa1b	0.481141	0.0209655	1	0.0993915	0.142857	Ramp3	2.79437	0.0193803	1	0.234043	0.0990991	Trabd	1.52849	0.000648472	1	0.389313	0.252137	Pex14	0.565998	0.00532315	1	0.101942	0.194667
												Psmb3	0.862993	0.020997	1	0.555781	0.573696	P2ry13	0.23837	0.0194009	1	0.0425532	0.189189	Ppil4	2.41711	0.000649484	1	0.167939	0.0726496	Acot8	0.687722	0.00533509	1	0.15534	0.269333
												Paxbp1	0.581391	0.0210079	1	0.0669371	0.108844	Abcb8	0.16077	0.0194236	1	0.0212766	0.153153	Pcbd2	1.49524	0.000651679	1	0.396947	0.247863	Rnpc3	0.694487	0.00537667	1	0.0728155	0.16
												Epb41l1	1.43184	0.02101	1	0.160243	0.106576	Tmem42	0.159912	0.0194236	1	0.0212766	0.153153	Plau	0.782924	0.000652061	1	0.641221	0.692308	Ptrhd1	0.682017	0.00539058	1	0.145631	0.261333
												Ndufs8	0.91203	0.0210376	1	0.732252	0.770975	Cdc42se2	0.660855	0.0194572	1	0.468085	0.666667	Fxr2	2.29719	0.000657915	1	0.165394	0.0726496	Wdr61	0.719014	0.00540327	1	0.169903	0.285333
												Rpl35a	1.11816	0.0210608	1	0.766734	0.698413	Limch1	3.1463	0.0195875	1	0.170213	0.0540541	Pls3	1.52867	0.000658189	1	0.323155	0.188034	Tiparp	0.699779	0.00541447	1	0.223301	0.344
												Epb41l4b	1.4108	0.0212785	1	0.144016	0.0929705	Sesn2	0.354044	0.0195943	1	0.106383	0.27027	Foxj3	1.99136	0.000670976	1	0.208651	0.102564	Brix1	0.535442	0.00549823	1	0.106796	0.2
												Rnf5	0.79387	0.0212897	1	0.391481	0.435374	Klf2	0.751482	0.0195978	1	0.659574	0.81982	Rint1	2.0949	0.000671507	1	0.201018	0.0982906	Sel1l	0.634866	0.00550663	1	0.203883	0.322667
												Tspan8	1.23929	0.0213139	1	0.330629	0.256236	Ssh1	3.68196	0.0196197	1	0.191489	0.0720721	Clcnkb	1.16071	0.000675504	1	0.839695	0.764957	1700017B05Rik	0.395069	0.00553719	1	0.038835	0.106667
												Txn1	0.802395	0.0213297	1	0.454361	0.47619	Dyrk3	0.554066	0.0197014	1	0.234043	0.459459	Cntfr	2.2915	0.000675769	1	0.167939	0.0726496	Scamp3	0.765517	0.00556333	1	0.237864	0.378667
												Pbx1	1.29501	0.0213691	1	0.243408	0.176871	Dhrs7b	0.00110734	0.0197561	1	0	0.108108	Asxl1	2.22489	0.00067816	1	0.178117	0.0811966	Plekho2	0.802733	0.00559222	1	0.567961	0.685333
												Ypel3	1.22535	0.0213701	1	0.377282	0.297052	Wdr41	0.00110757	0.0197561	1	0	0.108108	Rtn4ip1	1.55785	0.00068397	1	0.284987	0.162393	Nme2	0.886045	0.00559452	1	0.723301	0.754667
												Nde1	0.590011	0.0214128	1	0.0669371	0.108844	Pou6f1	0.00102651	0.0197561	1	0	0.108108	Nek8	1.9273	0.000692408	1	0.226463	0.115385	Eif2s1	0.731503	0.00560577	1	0.262136	0.405333
												Tet2	1.66606	0.0214493	1	0.111562	0.0680272	Cpox	0.177548	0.0197847	1	0.0212766	0.153153	Trp53inp1	3.72571	0.000693144	1	0.122137	0.042735	Stat2	0.46748	0.00571741	1	0.092233	0.176
												Twsg1	1.3168	0.0214498	1	0.255578	0.190476	Rnf5	0.613515	0.0198139	1	0.340426	0.567568	Oaz2	1.54815	0.000699088	1	0.384224	0.247863	Ufc1	0.758276	0.00572528	1	0.34466	0.490667
												Ppip5k1	1.53118	0.0214525	1	0.133874	0.0861678	Rgs2	0.449779	0.0198373	1	0.12766	0.315315	Arfgef1	1.55908	0.000702411	1	0.384224	0.252137	Slamf8	0.618745	0.00573055	1	0.121359	0.216
												Fez2	0.553567	0.0214557	1	0.0953347	0.14059	Slc2a6	0.356021	0.0198373	1	0.148936	0.306306	G630090E17Rik	1.7112	0.000703761	1	0.231552	0.115385	Ccdc124	0.753139	0.00575689	1	0.315534	0.453333
												Idh1	0.720522	0.0214774	1	0.198783	0.256236	Pdk1	4.47502	0.0199755	1	0.148936	0.045045	Pja2	1.61546	0.000710178	1	0.3257	0.192308	Tmem115	0.523803	0.00583066	1	0.0728155	0.154667
												Ube3c	1.74515	0.0215185	1	0.121704	0.0770975	Tspan17	4.36473	0.0199755	1	0.148936	0.045045	Tra2b	1.43619	0.0007103	1	0.498728	0.350427	Psma5	0.752961	0.00583588	1	0.354369	0.498667
												Dlat	0.796268	0.0217243	1	0.389452	0.435374	Slc26a2	4.81431	0.0199755	1	0.148936	0.045045	Snx7	1.59565	0.000714232	1	0.29771	0.17094	Lpcat2	0.678603	0.0058387	1	0.228155	0.349333
												Nucb1	1.23683	0.0218257	1	0.340771	0.267574	Gem	0.544508	0.0200265	1	0.191489	0.396396	Hdac6	1.94808	0.000718259	1	0.201018	0.0982906	Dedd	0.48194	0.00585677	1	0.0436893	0.112
												Polr2f	0.826524	0.0218455	1	0.425963	0.478458	Cald1	2.82643	0.0200455	1	0.234043	0.0990991	Lsm14b	1.58005	0.00071919	1	0.236641	0.119658	Rps26-ps1	0.562827	0.00587862	1	0.092233	0.184
												Arl6	0.714964	0.021861	1	0.141988	0.195011	Igfbp5	2.29808	0.0201505	1	0.255319	0.108108	Zfp664	1.37283	0.000726524	1	0.450382	0.311966	Tpp1	0.689369	0.00588523	1	0.223301	0.341333
												Mthfd1	0.812108	0.0218653	1	0.397566	0.45805	Mthfd2	0.174157	0.0201517	1	0.0212766	0.153153	Fzr1	1.65673	0.000727644	1	0.221374	0.111111	Flot1	0.689963	0.0059169	1	0.208738	0.330667
												Itgav	1.34685	0.0218719	1	0.275862	0.213152	Parp1	0.455204	0.0202512	1	0.12766	0.324324	Atp9b	2.3448	0.000738155	1	0.160305	0.0683761	Ube2j1	0.72517	0.00593088	1	0.228155	0.354667
												Zranb2	1.38027	0.0218937	1	0.21501	0.156463	Aacs	0.481617	0.0202732	1	0.170213	0.378378	Rab4a	1.67532	0.000739848	1	0.292621	0.17094	Cops8	0.660343	0.00593636	1	0.18932	0.309333
												Mbtd1	1.60047	0.0219368	1	0.103448	0.0612245	Btg1	0.723994	0.0202816	1	0.595745	0.792793	Hoxd4	2.46133	0.000741014	1	0.137405	0.0512821	Cct3	0.658821	0.00595275	1	0.203883	0.32
												Snf8	1.34559	0.0220258	1	0.196755	0.136054	Smtn	4.05006	0.0203734	1	0.191489	0.0720721	Clcn3	1.43882	0.000741301	1	0.435115	0.286325	Slc2a1	0.466617	0.00596531	1	0.0825243	0.165333
												Prom2	1.31517	0.0222398	1	0.237323	0.172336	Areg	0.282181	0.0203878	1	0.0425532	0.189189	Smim6	1.461	0.000752492	1	0.374046	0.226496	Ndufaf3	0.616154	0.00601667	1	0.140777	0.245333
												Stau1	1.47529	0.02231	1	0.162272	0.111111	Hlx	3.01192	0.02041	1	0.170213	0.0540541	Ap1ar	1.82166	0.00075837	1	0.165394	0.0683761	Csf2rb	0.732226	0.00603095	1	0.417476	0.530667
												Aldh2	0.843521	0.0223293	1	0.513185	0.528345	Hspe1	0.705301	0.0204237	1	0.574468	0.765766	Hdlbp	1.38882	0.000760641	1	0.534351	0.384615	Lcp1	0.898713	0.00603347	1	0.825243	0.842667
												Pfn1	0.907469	0.0223664	1	0.673428	0.689342	Cox17	1.36429	0.0204237	1	0.787234	0.675676	Stat3	1.48067	0.000768604	1	0.417303	0.282051	Tmod3	0.741157	0.00605013	1	0.271845	0.405333
												Gabarap	0.920061	0.0224057	1	0.707911	0.718821	Fmnl3	2.34864	0.0204721	1	0.191489	0.0630631	Kdm1b	1.99501	0.000775955	1	0.201018	0.0982906	Ring1	0.466224	0.00607156	1	0.0485437	0.12
												Pdhb	0.823696	0.0224088	1	0.425963	0.469388	Mrps21	0.675593	0.0205452	1	0.510638	0.711712	Nras	1.95011	0.000787628	1	0.180662	0.0811966	Cyfip2	1.56842	0.00608168	1	0.378641	0.298667
												Ago2	1.42156	0.02254	1	0.21501	0.156463	Luzp1	2.52109	0.0205519	1	0.212766	0.0810811	Gpbp1l1	1.59005	0.000787943	1	0.335878	0.209402	Slc30a7	0.560155	0.00608423	1	0.092233	0.181333
												Cln3	1.26635	0.0225679	1	0.25355	0.185941	Apoo	2.34233	0.0208324	1	0.170213	0.0540541	Aebp1	1.64986	0.000790622	1	0.267176	0.145299	Camk2d	0.749628	0.00609801	1	0.393204	0.530667
												Jun	0.700383	0.0225688	1	0.212982	0.269841	Crim1	2.71615	0.0208324	1	0.170213	0.0540541	1810022K09Rik	1.27913	0.000791248	1	0.671756	0.542735	Vti1a	0.677045	0.00611211	1	0.23301	0.36
												Smtn	1.37294	0.0225832	1	0.180527	0.124717	Lyl1	5.121	0.0208745	1	0.148936	0.045045	Adgrg3	2.11076	0.00080037	1	0.119593	0.0384615	Magt1	0.696018	0.00615454	1	0.26699	0.389333
												Ccnd3	0.767123	0.0226132	1	0.263692	0.321995	Arhgef12	4.19346	0.0208745	1	0.148936	0.045045	Tmem52b	1.36558	0.000801281	1	0.549618	0.42735	Mcl1	1.15275	0.00617281	1	0.781553	0.762667
												Cnot6l	1.30188	0.022768	1	0.178499	0.122449	Mcam	4.1183	0.0208745	1	0.148936	0.045045	Mbip	2.30043	0.000804324	1	0.165394	0.0726496	Nubp2	0.648145	0.00622871	1	0.179612	0.290667
												Macf1	1.34769	0.0229092	1	0.281947	0.219955	Pop4	0.401121	0.020963	1	0.0638298	0.225225	5730455P16Rik	2.11981	0.000804851	1	0.150127	0.0598291	Dda1	0.752412	0.00624721	1	0.281553	0.426667
												Cdh16	1.10474	0.023057	1	0.762677	0.718821	Nucb2	0.682556	0.0211901	1	0.489362	0.720721	Dnmt1	2.63706	0.000806833	1	0.104326	0.0299145	Edem2	0.653611	0.00626969	1	0.194175	0.304
												Slmo2	0.773734	0.0232038	1	0.237323	0.297052	Slc27a2	2.1701	0.0212985	1	0.212766	0.0810811	Tmie	1.70014	0.000809221	1	0.292621	0.175214	Il11ra1	0.408978	0.00628485	1	0.0436893	0.112
												Vps52	1.55621	0.0232446	1	0.137931	0.0907029	3110040N11Rik	0.335307	0.0213035	1	0.0638298	0.216216	Slc35b4	2.04994	0.000811374	1	0.211196	0.106838	Polr3d	0.385235	0.00635719	1	0.038835	0.104
												Cdc26	0.751443	0.0233937	1	0.176471	0.235828	Nupl2	3.85871	0.0213371	1	0.148936	0.045045	Mrpl18	1.32087	0.000814854	1	0.628499	0.452991	Naa25	0.423794	0.00636912	1	0.0582524	0.130667
												4930481A15Rik	1.46188	0.023589	1	0.148073	0.0975057	A230046K03Rik	0.415414	0.0213955	1	0.106383	0.288288	Glud1	1.26232	0.000817013	1	0.732824	0.611111	Hsp90b1	0.832524	0.00640273	1	0.616505	0.714667
												B3gat3	1.35479	0.023644	1	0.184584	0.129252	1110008P14Rik	0.598942	0.0215669	1	0.255319	0.522523	L2hgdh	1.56485	0.000818714	1	0.351145	0.226496	Ptpro	0.795193	0.00640459	1	0.461165	0.584
												Mvb12a	1.22481	0.023692	1	0.43002	0.346939	Ddit4	1.94336	0.0216605	1	0.340426	0.18018	Bcar1	1.63015	0.000820817	1	0.330789	0.205128	Pim1	0.864168	0.00643874	1	0.757282	0.858667
												Megf8	1.67162	0.0237206	1	0.105477	0.0634921	Clec10a	0.669041	0.0217072	1	0.446809	0.675676	2810029C07Rik	3.78196	0.000826717	1	0.101781	0.0299145	Tmem131	0.687248	0.00644803	1	0.174757	0.288
												Igfbp7	1.06271	0.0239516	1	0.860041	0.839002	Elk3	3.49082	0.0217663	1	0.255319	0.126126	Aen	2.28396	0.000837536	1	0.188295	0.0897436	Thoc5	0.424425	0.00652072	1	0.0582524	0.130667
												Pcolce	0.882906	0.0239632	1	0.628803	0.643991	Pusl1	3.622	0.0218086	1	0.148936	0.045045	Ctsc	0.641038	0.000841471	1	0.340967	0.431624	Rnpep	0.785155	0.00654923	1	0.354369	0.509333
												Pcyox1	1.28011	0.0240431	1	0.275862	0.208617	Lsm6	0.629073	0.0218801	1	0.382979	0.612613	Rb1cc1	1.42087	0.000842871	1	0.435115	0.299145	Ear2	1.3419	0.00656675	1	0.524272	0.413333
												Txnip	1.17363	0.0240755	1	0.624746	0.539683	Acaa2	1.95667	0.021924	1	0.361702	0.198198	Lsm2	2.07598	0.000844677	1	0.216285	0.111111	Gstm1	1.38899	0.00659028	1	0.470874	0.4
												Timm17a	0.837965	0.0241349	1	0.450304	0.492063	Pole4	0.637861	0.0219339	1	0.361702	0.612613	Perp	2.04551	0.000850197	1	0.178117	0.0811966	Map4k4	1.47158	0.00659086	1	0.354369	0.264
												Ctbp2	1.34744	0.0241565	1	0.176471	0.122449	Ralb	3.23361	0.0219568	1	0.191489	0.0720721	Pm20d1	2.85264	0.000850509	1	0.13486	0.0512821	Rest	0.63632	0.00663782	1	0.126214	0.226667
												Arrdc1	1.40202	0.024286	1	0.178499	0.124717	Tmem175	0.13267	0.0219568	1	0.0212766	0.144144	Sec62	1.20399	0.000852971	1	0.877863	0.735043	Ap3s2	0.502431	0.00664255	1	0.0582524	0.133333
												Ssbp3	1.39717	0.0243784	1	0.204868	0.147392	Rnf34	0.198676	0.0219785	1	0.0425532	0.18018	Ap3m1	2.38422	0.000860292	1	0.165394	0.0726496	Vat1	0.584536	0.00668297	1	0.0679612	0.146667
												Pet100	1.1731	0.0244035	1	0.551724	0.485261	Hoxa7	0.378087	0.0220296	1	0.148936	0.315315	Rps6ka3	2.48885	0.00086318	1	0.167939	0.0769231	Slc35b4	0.58671	0.00668411	1	0.0436893	0.114667
												Krt7	0.798549	0.024414	1	0.393509	0.433107	Cnot2	0.488207	0.0220488	1	0.148936	0.351351	Ifi35	1.95277	0.000866233	1	0.185751	0.0854701	Stk3	0.67687	0.00670002	1	0.0728155	0.154667
												Pdk2	0.811369	0.0246077	1	0.427992	0.464853	Kitl	2.77889	0.0221457	1	0.170213	0.0540541	Vps4b	1.62954	0.000877526	1	0.318066	0.196581	Parp12	0.529771	0.00670728	1	0.092233	0.178667
												Smpd1	0.745201	0.0248299	1	0.30426	0.353741	Ttc7	0.577311	0.0221503	1	0.297872	0.513514	Sntb2	3.0842	0.000878779	1	0.104326	0.0299145	Mepce	2.50814	0.00672791	1	0.126214	0.064
												Ube2j1	1.49583	0.0249902	1	0.154158	0.104308	Smim5	0.667795	0.0223041	1	0.446809	0.738739	Kdm5b	1.85358	0.000880313	1	0.193384	0.0897436	Wdr55	0.592434	0.00675462	1	0.0728155	0.154667
												Rbm3	1.29967	0.0250258	1	0.371197	0.306122	Asnsd1	3.22477	0.022369	1	0.191489	0.0720721	Osbpl11	3.6119	0.000881906	1	0.101781	0.0299145	Yipf1	0.681166	0.00676541	1	0.179612	0.301333
												St14	1.22677	0.025094	1	0.36714	0.297052	Egr1	0.358527	0.0224804	1	0.0851064	0.243243	Tuft1	1.93755	0.000886074	1	0.229008	0.123932	Egr1	0.757047	0.00677063	1	0.262136	0.386667
												Gatm	1.41494	0.0250992	1	0.141988	0.0929705	Nfatc3	0.212813	0.0225377	1	0.0638298	0.198198	Matn4	2.8807	0.000888244	1	0.101781	0.0299145	Pgls	0.788514	0.00677498	1	0.5	0.656
												Myo18a	1.30217	0.0251617	1	0.300203	0.23356	Hao2	2.89959	0.0225992	1	0.170213	0.0540541	Rps6ka4	1.86611	0.000888617	1	0.19084	0.0897436	Arid3a	1.92875	0.00686531	1	0.223301	0.144
												Pam	1.27978	0.0252503	1	0.144016	0.0929705	Gm10076	0.976373	0.0227074	1	1	0.954955	Tcea1	1.29589	0.000898727	1	0.592875	0.448718	Ttpal	0.434453	0.00690378	1	0.038835	0.104
												Hadh	0.877438	0.0253761	1	0.592292	0.630385	Ppm1f	3.4409	0.0227788	1	0.148936	0.045045	Nacc1	2.06099	0.00090766	1	0.152672	0.0641026	0610007P14Rik	0.614438	0.00691229	1	0.0970874	0.184
												Cpq	1.3622	0.0254679	1	0.182556	0.126984	Tspan9	3.16399	0.0227879	1	0.191489	0.0720721	Snrpd1	1.44889	0.000916705	1	0.414758	0.277778	Pelp1	0.458166	0.00691398	1	0.0436893	0.112
												Abcc1	1.44	0.0254845	1	0.11359	0.0702948	Fnbp4	0.284534	0.0229923	1	0.0638298	0.216216	Llgl2	1.41896	0.000925009	1	0.447837	0.303419	Myd88	0.781796	0.00693467	1	0.417476	0.56
												Ube2d1	0.571745	0.0255875	1	0.0953347	0.138322	Pkn1	0.331347	0.0231997	1	0.106383	0.261261	Nufip2	1.94197	0.000935361	1	0.244275	0.136752	Lman1	0.561678	0.00697377	1	0.116505	0.210667
												Mrpl22	0.729349	0.0256155	1	0.261663	0.303855	Tmem80	0.217368	0.0232558	1	0.0638298	0.198198	Wac	1.52034	0.000937118	1	0.295165	0.166667	Tma7	0.820967	0.00699375	1	0.592233	0.72
												Kcp	0.634898	0.0256801	1	0.0791075	0.122449	Pank4	3.40758	0.0232778	1	0.148936	0.045045	Shmt1	1.35085	0.000937332	1	0.613232	0.461538	Bcl2l13	0.436119	0.00699518	1	0.0582524	0.130667
												2022-03-02	1.33549	0.0257888	1	0.227181	0.165533	Rora	4.33826	0.0232778	1	0.148936	0.045045	Slain2	1.97628	0.000937933	1	0.165394	0.0726496	Azin1	0.676454	0.00702265	1	0.242718	0.36
												Nol7	0.788658	0.0258189	1	0.348884	0.401361	Gimap4	2.03094	0.0232854	1	0.255319	0.108108	Slk	1.68307	0.00094012	1	0.262087	0.145299	Rfwd2	2.22007	0.00706347	1	0.18932	0.114667
												0610012G03Rik	0.885482	0.0258366	1	0.604462	0.632653	Eif4enif1	2.7351	0.0232913	1	0.234043	0.0990991	Papola	1.41226	0.000957573	1	0.506361	0.367521	Plekha2	0.626244	0.0070907	1	0.126214	0.221333
												Zc2hc1a	0.543249	0.0258477	1	0.0730223	0.113379	2410002F23Rik	0.507739	0.0235287	1	0.191489	0.36036	Usp46	1.57278	0.000959569	1	0.328244	0.200855	Ly6c2	0.694074	0.00709551	1	0.296117	0.402667
												Tef	1.49753	0.0262872	1	0.148073	0.0997732	Amotl2	2.44306	0.0235304	1	0.170213	0.0540541	Vps37b	1.6638	0.000960775	1	0.312977	0.192308	Mycbp2	0.741077	0.007142	1	0.349515	0.464
												Rer1	0.787191	0.0263495	1	0.37931	0.417234	Adgrf5	2.21051	0.0236586	1	0.255319	0.108108	Lars2	1.30804	0.000962904	1	0.712468	0.564103	U2surp	0.718732	0.00717459	1	0.242718	0.368
												Nkap	0.58747	0.0264666	1	0.111562	0.156463	Drap1	2.18162	0.0237934	1	0.340426	0.198198	Capns1	1.35087	0.000966551	1	0.56743	0.393162	Rpl22l1	1.15819	0.00719145	1	0.737864	0.714667
												Ltbr	0.717385	0.0265289	1	0.172414	0.226757	Kynu	0.555581	0.0239344	1	0.297872	0.477477	Socs2	1.71995	0.000967054	1	0.264631	0.149573	Slfn4	0.387048	0.00719427	1	0.0436893	0.109333
												Tsg101	0.721204	0.0265491	1	0.194726	0.249433	Ppp6r3	2.12487	0.0239943	1	0.276596	0.135135	Ube2d2a	1.32121	0.000967077	1	0.590331	0.440171	Ube3a	0.714881	0.00721523	1	0.213592	0.333333
												Dynll1	0.830374	0.0266332	1	0.413793	0.46712	Snx29	0.52189	0.0240138	1	0.148936	0.369369	Inppl1	1.84361	0.000968328	1	0.244275	0.136752	Ccdc86	0.615911	0.00722152	1	0.116505	0.210667
												Lrp2	0.629916	0.0270681	1	0.103448	0.14966	Ikbip	0.346114	0.0240604	1	0.0638298	0.216216	Slf1	2.27454	0.000970006	1	0.152672	0.0641026	Slc35b2	0.708705	0.00723295	1	0.174757	0.290667
												Psmc5	0.732525	0.0271728	1	0.279919	0.333333	Rpl23	0.943497	0.0241036	1	1	0.972973	Tbce	1.79956	0.000970397	1	0.21883	0.111111	Fn1	1.51956	0.00726739	1	0.412621	0.352
												Prkce	1.33227	0.0271768	1	0.158215	0.106576	Adora2a	3.77153	0.0241306	1	0.212766	0.0900901	Plekhb2	1.43537	0.000971098	1	0.435115	0.303419	Mtpn	0.807866	0.00734052	1	0.538835	0.629333
												Nicn1	1.54954	0.0272106	1	0.141988	0.0952381	Mapk3	2.05204	0.0244206	1	0.255319	0.108108	Bud31	1.5465	0.000977087	1	0.351145	0.222222	Npm3	0.699746	0.00734924	1	0.262136	0.378667
												Atp5g1	0.967295	0.0272273	1	0.926978	0.943311	Cc2d1a	0.252272	0.0244337	1	0.0638298	0.207207	Lamb1	1.33633	0.000980791	1	0.575064	0.440171	Sec13	0.753598	0.0073926	1	0.305825	0.44
												Stt3a	1.42542	0.027292	1	0.192698	0.138322	Vps4b	1.65826	0.0244763	1	0.553191	0.387387	Hnrnpul2	1.54549	0.000988222	1	0.379135	0.252137	Pmvk	0.564532	0.00739357	1	0.0825243	0.165333
												Alkbh7	0.740298	0.0273183	1	0.261663	0.310658	Upp1	2.12991	0.024526	1	0.212766	0.0810811	Tab2	1.94189	0.00100002	1	0.236641	0.132479	Ndufa4	0.84422	0.00742413	1	0.665049	0.776
												Gata3	1.27787	0.0275726	1	0.235294	0.172336	Slc35c2	0.637298	0.0246232	1	0.361702	0.585586	Strbp	1.40979	0.00100054	1	0.307888	0.17094	Usp14	0.620016	0.00746636	1	0.0970874	0.186667
												Tma7	0.889831	0.0276488	1	0.618661	0.637188	Fabp5	2.46553	0.0247516	1	0.255319	0.117117	Zbtb24	2.67476	0.00100613	1	0.145038	0.0598291	Phc3	2.21977	0.00747902	1	0.150485	0.0826667
												Dhrs1	0.724135	0.0276835	1	0.210953	0.260771	Ptprcap	0.679942	0.0248254	1	0.468085	0.711712	Col4a3	1.41801	0.00100851	1	0.422392	0.277778	Rps25	1.05063	0.00748263	1	0.81068	0.829333
												Isca2	0.801487	0.0276839	1	0.31643	0.369615	Nfib	2.50485	0.0248746	1	0.234043	0.0990991	Pdgfa	1.83185	0.00100931	1	0.244275	0.136752	Ldlrad3	1.63854	0.00748576	1	0.354369	0.28
												DHRSX	1.60998	0.0277104	1	0.10142	0.0612245	Sh2b2	0.527717	0.0249194	1	0.234043	0.432432	Pcf11	1.80539	0.00101193	1	0.234097	0.123932	Mydgf	0.674742	0.00749489	1	0.23301	0.352
												Prr15l	0.799526	0.0277195	1	0.346856	0.394558	Ccdc32	0.578324	0.0249771	1	0.148936	0.324324	Ino80b	2.37312	0.00101309	1	0.117048	0.0384615	Tm9sf1	0.718992	0.00750475	1	0.179612	0.293333
												Dalrd3	1.32093	0.0279536	1	0.221095	0.160998	Nek1	0.150489	0.0249863	1	0.0212766	0.144144	Pmm1	1.61888	0.00101955	1	0.277354	0.15812	Tmub1	0.597585	0.00751124	1	0.121359	0.218667
												Gstp1	0.872038	0.0280405	1	0.551724	0.598639	1110001J03Rik	0.540261	0.0250209	1	0.212766	0.405405	Mthfd2l	1.69292	0.00102513	1	0.272265	0.153846	Myl12a	0.864192	0.00755829	1	0.703883	0.768
												St5	1.33702	0.0280707	1	0.194726	0.138322	F5	4.59762	0.0251208	1	0.12766	0.036036	Mapkapk2	1.53904	0.00104002	1	0.340967	0.222222	Psmd8	0.799156	0.00758316	1	0.538835	0.656
												AI661453	1.53272	0.0280738	1	0.154158	0.106576	Mrps10	0.325086	0.0251713	1	0.0638298	0.216216	Ctage5	1.43151	0.00104498	1	0.37659	0.235043	Dazap2	0.857236	0.00766477	1	0.699029	0.786667
												Faah	0.592216	0.0281279	1	0.0649087	0.104308	Ucp2	0.773777	0.0252113	1	0.702128	0.837838	Srrm1	1.34265	0.00104583	1	0.536896	0.388889	Dpm2	0.703803	0.00767748	1	0.199029	0.32
												Abat	0.692146	0.0282623	1	0.131846	0.181406	Pcnp	1.66441	0.0253866	1	0.468085	0.306306	Trim47	1.46979	0.0010462	1	0.340967	0.200855	Nars	0.717033	0.00770114	1	0.26699	0.397333
												Rab11fip4	1.38241	0.0283012	1	0.219067	0.160998	Tlr7	0.54884	0.0254458	1	0.276596	0.459459	Ppp1cb	1.3871	0.00104682	1	0.452926	0.303419	Riok1	0.606766	0.007712	1	0.0679612	0.146667
												Tmem127	1.49503	0.028353	1	0.148073	0.0997732	Tmem230	0.446559	0.0256115	1	0.148936	0.324324	Dnajc5	1.45333	0.00104895	1	0.417303	0.277778	Haus2	0.519248	0.00771483	1	0.038835	0.104
												Snap23	0.626823	0.0285364	1	0.0953347	0.14059	Cyp51	0.585708	0.0256312	1	0.234043	0.441441	Ppih	2.18692	0.00107423	1	0.13486	0.0512821	Nenf	0.594972	0.00774698	1	0.121359	0.213333
												Fnip2	1.3159	0.028685	1	0.105477	0.0634921	Ap3d1	0.553188	0.0256673	1	0.170213	0.36036	Nucks1	1.57369	0.00107561	1	0.335878	0.222222	Nol7	0.792658	0.00779562	1	0.34466	0.485333
												Psmc1	0.723902	0.0287335	1	0.227181	0.278912	Crbn	2.68123	0.0256783	1	0.276596	0.144144	Dnm2	1.42439	0.00107811	1	0.473282	0.34188	Apba3	0.59607	0.00780555	1	0.0825243	0.165333
												Hadha	0.864032	0.0288295	1	0.521298	0.557823	Cops2	0.515229	0.0256927	1	0.191489	0.378378	Evi5	1.9989	0.00108189	1	0.203562	0.106838	Dpp9	0.568988	0.00781819	1	0.0970874	0.184
												B4galt6	1.3644	0.0288381	1	0.139959	0.0907029	Ano10	3.20869	0.0257119	1	0.212766	0.0990991	Arhgef18	1.56468	0.00109647	1	0.343511	0.213675	Amdhd2	0.695532	0.00787494	1	0.160194	0.272
												Cisd3	0.686517	0.0288988	1	0.174442	0.22449	Abcb1b	0.475311	0.0257196	1	0.148936	0.342342	Pla2g16	1.66101	0.00110279	1	0.279898	0.162393	Nmt1	0.730106	0.007934	1	0.315534	0.453333
												Desi1	0.719408	0.0289352	1	0.0973631	0.145125	Tcf12	0.533617	0.0257534	1	0.255319	0.441441	Tfap2b	1.22182	0.00110467	1	0.755725	0.628205	Sacm1l	0.47664	0.00793772	1	0.0679612	0.144
												Arfgef1	1.33576	0.0289973	1	0.26572	0.204082	Hdlbp	0.663582	0.0258376	1	0.361702	0.576577	Phldb1	1.96365	0.00110992	1	0.152672	0.0641026	Rpl17	1.07716	0.00812726	1	0.834951	0.824
												Ppp2cb	1.53759	0.0291089	1	0.123732	0.0793651	Thnsl2	0.202462	0.0259158	1	0.0212766	0.144144	Fbxo31	4.28329	0.00111019	1	0.104326	0.034188	Igsf8	0.581308	0.00815649	1	0.126214	0.221333
												Fam53a	0.586534	0.0291243	1	0.0770791	0.117914	Asap2	2.71694	0.0259178	1	0.148936	0.045045	Pura	1.44346	0.00111434	1	0.450382	0.324786	Cdc26	0.674419	0.00819706	1	0.23301	0.341333
												Plekha1	1.28889	0.029389	1	0.196755	0.14059	Sparc	1.97233	0.0259908	1	0.361702	0.198198	Psmd2	1.45728	0.0011157	1	0.427481	0.286325	Sipa1l3	0.459606	0.00822936	1	0.0825243	0.16
												Pno1	0.688125	0.0294089	1	0.170385	0.219955	AU021092	2.16957	0.0260085	1	0.255319	0.108108	Scin	1.35121	0.00111825	1	0.554707	0.41453	Pcyt2	0.623928	0.00823103	1	0.150485	0.250667
												Aip	0.70291	0.0294285	1	0.150101	0.201814	Rab11a	1.58524	0.0260336	1	0.617021	0.522523	Psmg4	1.4187	0.00112022	1	0.356234	0.226496	Uckl1	0.767981	0.00823722	1	0.18932	0.306667
												Adhfe1	0.704433	0.0294763	1	0.184584	0.235828	Hsp90ab1	0.891288	0.0260691	1	0.914894	0.963964	Nckap1	1.49044	0.00112174	1	0.343511	0.209402	Pdzd11	0.58362	0.00829548	1	0.121359	0.213333
												Copg2	1.45737	0.0295037	1	0.107505	0.0657596	Lsm5	0.605335	0.0260726	1	0.234043	0.432432	Gas8	1.95325	0.00112751	1	0.223919	0.119658	Cib1	0.735117	0.00835277	1	0.349515	0.469333
												Sim1	1.5391	0.0295972	1	0.144016	0.0975057	Tipin	2.54133	0.026275	1	0.212766	0.0900901	Grpel2	2.01283	0.00114298	1	0.234097	0.132479	H2-K1	0.92696	0.00835848	1	0.902913	0.933333
												Rnh1	0.782871	0.0296	1	0.249493	0.30839	Setd4	4.82759	0.0263161	1	0.12766	0.036036	Rab14	1.24368	0.00114628	1	0.737913	0.598291	Isyna1	0.569913	0.00837332	1	0.131068	0.221333
												Gm8730	1.60185	0.0296049	1	0.146045	0.0997732	Gsdmd	2.07064	0.0263254	1	0.382979	0.234234	Gsn	1.9061	0.00114659	1	0.206107	0.102564	Sdad1	0.594463	0.00837783	1	0.140777	0.237333
												Txnrd1	0.690512	0.029685	1	0.121704	0.170068	Rpl36al	0.827473	0.0264625	1	0.808511	0.90991	Cep68	1.77174	0.0011484	1	0.216285	0.111111	Asph	0.508921	0.00841616	1	0.106796	0.189333
												Tprn	1.43355	0.029709	1	0.131846	0.0861678	Dolpp1	3.12871	0.0264757	1	0.148936	0.045045	2022-09-07	1.49231	0.00114866	1	0.37659	0.239316	Mrpl16	0.578531	0.00849876	1	0.092233	0.178667
												Wbscr27	1.44076	0.029736	1	0.160243	0.111111	Fzd4	3.26271	0.0264757	1	0.148936	0.045045	Trp53bp2	1.38921	0.00114872	1	0.402036	0.25641	Pqbp1	0.614172	0.00851586	1	0.116505	0.208
												Pepd	0.66359	0.0297725	1	0.192698	0.238095	Dusp7	3.19522	0.0264757	1	0.148936	0.045045	Atxn7	2.41362	0.00115816	1	0.150127	0.0641026	Erp29	0.832041	0.00851773	1	0.626214	0.725333
												Mgat4b	1.20903	0.0298278	1	0.263692	0.195011	Pycard	0.637882	0.0264853	1	0.361702	0.585586	Sfi1	3.07223	0.00116081	1	0.10687	0.034188	Ap2m1	0.79481	0.0085407	1	0.529126	0.664
												Fdx1	0.861523	0.0298624	1	0.490872	0.528345	Cd81	1.89105	0.0265323	1	0.425532	0.261261	Pnpo	1.61241	0.00116176	1	0.29771	0.183761	Slc9a3r1	0.762916	0.00854191	1	0.368932	0.485333
												Bst2	1.37179	0.0300067	1	0.127789	0.0816327	Rpl26	0.917724	0.0265872	1	0.957447	0.954955	Adipor2	1.52233	0.00118275	1	0.292621	0.166667	Yif1a	0.63825	0.00854357	1	0.116505	0.210667
												Rgs2	1.36583	0.0300279	1	0.129817	0.0839002	Cd151	2.27566	0.0266597	1	0.361702	0.225225	Timm23	1.26492	0.00118387	1	0.671756	0.551282	Mical1	0.629812	0.00855295	1	0.169903	0.274667
												Cox5a	0.967331	0.0302162	1	0.884381	0.888889	Tet3	0.312269	0.0267664	1	0.0425532	0.18018	Zfp148	1.69321	0.00118699	1	0.29771	0.188034	Phlda1	0.635857	0.00857379	1	0.106796	0.194667
												Cox14	0.887277	0.0302868	1	0.630832	0.641723	Dtnbp1	0.253087	0.0267664	1	0.0425532	0.18018	Stx7	1.30428	0.0011975	1	0.636132	0.474359	Amz1	0.60043	0.00857705	1	0.169903	0.269333
												Selk	0.875552	0.030307	1	0.470588	0.530612	Ggta1	2.1961	0.026875	1	0.191489	0.0720721	Suv420h2	1.9066	0.00123065	1	0.21883	0.115385	Srp14	0.772256	0.00859945	1	0.475728	0.597333
												Sppl3	1.34348	0.0303824	1	0.11359	0.0702948	Clock	2.50186	0.026875	1	0.191489	0.0720721	Dennd1a	1.74549	0.00123701	1	0.195929	0.0982906	Pyurf	0.700017	0.00863494	1	0.121359	0.224
												Ccpg1os	1.40855	0.0305754	1	0.131846	0.0861678	Ecscr	2.80494	0.026875	1	0.191489	0.0720721	Ptbp1	1.36771	0.00123798	1	0.496183	0.34188	Fxyd2	1.33854	0.00864487	1	0.412621	0.304
												Cdc42bpa	1.36959	0.0307412	1	0.182556	0.129252	Fam169b	0.205702	0.026875	1	0.0212766	0.144144	Eny2	1.25995	0.00124026	1	0.656489	0.508547	Efcab14	0.565512	0.00870329	1	0.0776699	0.157333
												Qdpr	0.785163	0.0308684	1	0.312373	0.358277	Erp44	0.571492	0.0269282	1	0.255319	0.441441	Cuedc1	1.65653	0.00124191	1	0.274809	0.15812	Ptdss1	0.716086	0.00874613	1	0.150485	0.253333
												Trappc12	0.606005	0.0308737	1	0.0791075	0.120181	Wapl	0.180652	0.0270223	1	0.0425532	0.171171	Usp19	1.55814	0.00125355	1	0.340967	0.222222	Dcps	0.643564	0.00877611	1	0.140777	0.242667
												Unc93b1	0.670914	0.0309371	1	0.0689655	0.108844	Rpl34	0.955579	0.027115	1	0.978723	0.963964	Nkap	2.2194	0.00126261	1	0.185751	0.0897436	Stim2	1.9349	0.00881985	1	0.121359	0.0586667
												Wdr45b	0.674129	0.0309988	1	0.0912779	0.136054	Spn	0.536616	0.0271158	1	0.276596	0.45045	Dnajb1	1.64692	0.00129938	1	0.3257	0.205128	2410004B18Rik	0.671074	0.00883914	1	0.126214	0.221333
												Dab2ip	1.24217	0.0310621	1	0.139959	0.0907029	Atp5a1	1.20079	0.0271451	1	0.893617	0.837838	Mat2a	1.43602	0.00130232	1	0.46056	0.320513	Tyrobp	0.948137	0.00884061	1	0.902913	0.930667
												Tmie	0.606168	0.0310805	1	0.103448	0.147392	Tmem55a	2.09447	0.0271515	1	0.255319	0.117117	Capg	2.54802	0.00130324	1	0.142494	0.0598291	Whsc1	0.414314	0.00884725	1	0.038835	0.101333
												Pmepa1	0.758496	0.0311393	1	0.174442	0.231293	Taf6l	0.6542	0.0273565	1	0.425532	0.630631	Plekhg3	1.62291	0.00130349	1	0.300254	0.188034	Slc39a1	0.633353	0.00889974	1	0.101942	0.192
												Atp5c1	0.968179	0.0311849	1	0.878296	0.863946	Pitpnc1	2.28272	0.027366	1	0.191489	0.0720721	Afg3l2	1.45472	0.00130982	1	0.361323	0.235043	Mtap	0.462529	0.00890463	1	0.038835	0.101333
												Cryzl1	0.638812	0.0312373	1	0.0933063	0.136054	Zzz3	2.40948	0.0273797	1	0.255319	0.126126	Aplp2	1.28854	0.00131455	1	0.656489	0.525641	Tbk1	0.685628	0.00891029	1	0.101942	0.192
												Dach1	1.47554	0.0312496	1	0.137931	0.0929705	Plekhm3	0.644823	0.0273976	1	0.361702	0.54955	Hnf1b	1.39355	0.00131471	1	0.529262	0.397436	2310009B15Rik	0.62024	0.00892908	1	0.121359	0.216
												Cys1	1.31184	0.0313876	1	0.137931	0.0907029	Dnajc15	0.441801	0.0274109	1	0.212766	0.378378	Gng12	1.26307	0.00131518	1	0.73028	0.564103	Usp38	0.429128	0.00896594	1	0.0485437	0.114667
												Fam96b	0.784505	0.0314587	1	0.322515	0.369615	Copg1	0.547855	0.0274119	1	0.234043	0.441441	Ammecr1l	1.59013	0.00131707	1	0.290076	0.17094	Snapc1	0.638362	0.00898632	1	0.0533981	0.125333
												Lmbrd1	1.25049	0.0314801	1	0.196755	0.138322	Dusp9	0.337154	0.0274297	1	0.0851064	0.243243	Tprgl	1.54342	0.00133274	1	0.310433	0.183761	Mrpl3	0.660266	0.00905864	1	0.11165	0.205333
												Hdac2	0.599905	0.0316313	1	0.0892495	0.131519	Khk	0.658779	0.0274891	1	0.425532	0.594595	Wdr33	1.46261	0.00133298	1	0.422392	0.290598	Ecd	0.614378	0.00910285	1	0.092233	0.178667
												Trim44	1.34054	0.0317208	1	0.200811	0.147392	Pdlim7	6.07419	0.0275602	1	0.12766	0.036036	Gde1	1.26555	0.00133768	1	0.648855	0.542735	Utp11l	0.690296	0.00912303	1	0.160194	0.269333
												Ppib	0.926086	0.0318881	1	0.728195	0.761905	Ndufs7	0.675133	0.0276504	1	0.510638	0.684685	Psmd1	1.45402	0.00133818	1	0.366412	0.235043	Med29	0.675553	0.0091795	1	0.160194	0.266667
												Ndufs3	0.936927	0.032148	1	0.766734	0.773243	Nr4a1	0.641395	0.027681	1	0.425532	0.603604	Lnx1	1.51608	0.00134335	1	0.371501	0.24359	Slc30a5	0.618021	0.00922398	1	0.11165	0.202667
												Tsc22d4	1.20024	0.032405	1	0.37931	0.303855	Abcc1	1.85657	0.0277292	1	0.361702	0.216216	Inadl	1.48105	0.00135616	1	0.394402	0.264957	Hnrnpll	0.614777	0.00926633	1	0.101942	0.189333
												Ndrg1	1.12695	0.0324532	1	0.549696	0.462585	Far1	0.52279	0.02792	1	0.12766	0.306306	Nr1d1	1.34876	0.00136928	1	0.516539	0.376068	Rhbdf2	0.619333	0.00926787	1	0.131068	0.226667
												Chdh	1.49227	0.0326709	1	0.166329	0.117914	Camta1	2.10145	0.0279388	1	0.297872	0.144144	Rnf149	1.69287	0.00137518	1	0.236641	0.128205	Atp8a1	0.666756	0.00928827	1	0.126214	0.218667
												Drg1	0.582297	0.0327511	1	0.121704	0.165533	Rab10os	0.459639	0.0280802	1	0.191489	0.351351	Eif2s3y	1.50548	0.00137924	1	0.351145	0.226496	Rpl13a	1.0371	0.00935174	1	0.883495	0.890667
												Lrba	1.19669	0.032757	1	0.334686	0.258503	Cd44	0.649269	0.0281375	1	0.382979	0.603604	Lpp	1.635	0.00138781	1	0.358779	0.24359	Sec62	0.776052	0.00936381	1	0.407767	0.554667
												Gm10053	0.593819	0.0330173	1	0.0973631	0.138322	Stxbp5	4.37082	0.028201	1	0.12766	0.036036	Ccar1	1.42995	0.00138912	1	0.407125	0.260684	Tsg101	0.702365	0.00936388	1	0.203883	0.317333
												Mat2a	0.705476	0.033185	1	0.223124	0.272109	Sac3d1	4.36067	0.028201	1	0.12766	0.036036	Leng8	1.47304	0.00139133	1	0.37659	0.25641	Rpl36	1.03518	0.00936587	1	0.927184	0.925333
												Hmgb2	0.760704	0.0332209	1	0.162272	0.217687	4931406P16Rik	2.09135	0.0282095	1	0.276596	0.135135	Brd2	1.3248	0.00139843	1	0.554707	0.418803	Usp12	0.699141	0.00942462	1	0.126214	0.226667
												Paqr5	0.881895	0.033229	1	0.592292	0.612245	Txndc5	0.678037	0.0284178	1	0.468085	0.666667	Ccl27a	1.49447	0.0013994	1	0.386768	0.252137	Flt1	1.89596	0.00947744	1	0.116505	0.056
												Nbeal2	1.60064	0.0332637	1	0.115619	0.0748299	Cited2	0.251977	0.028551	1	0.0425532	0.18018	Abhd11	1.33854	0.00140622	1	0.48855	0.32906	Herc6	0.40688	0.00948253	1	0.0436893	0.106667
												Pah	0.579884	0.0333678	1	0.0669371	0.104308	Xpa	1.98798	0.0285669	1	0.340426	0.198198	Ensa	1.53634	0.00140913	1	0.361323	0.235043	Brd4	1.38992	0.00949319	1	0.42233	0.336
												Pex2	0.702445	0.0334556	1	0.182556	0.23356	Acap1	0.640648	0.0288331	1	0.361702	0.567568	Pfkm	1.35474	0.00141774	1	0.475827	0.337607	Tomm5	0.769082	0.00954806	1	0.305825	0.432
												Eif3g	1.30127	0.0334688	1	0.190669	0.136054	Anxa5	1.42941	0.0288399	1	0.680851	0.621622	Mlxip	2.91438	0.00142393	1	0.111959	0.0384615	Elovl1	0.774975	0.00957031	1	0.31068	0.448
												Tmem72	1.13195	0.0334958	1	0.653144	0.582766	Vprbp	3.85408	0.0288547	1	0.12766	0.036036	Yae1d1	1.56258	0.001425	1	0.284987	0.17094	Dbnl	0.771305	0.00959152	1	0.480583	0.584
												Ctage5	0.742399	0.0336114	1	0.204868	0.256236	Rom1	4.22253	0.0288547	1	0.12766	0.036036	Klf3	2.95785	0.00143327	1	0.111959	0.0384615	Uqcrc2	0.77501	0.00959552	1	0.339806	0.498667
												Ypel5	1.35145	0.0337238	1	0.245436	0.188209	Plpp3	1.86827	0.0289572	1	0.319149	0.162162	H2afx	1.72586	0.00143749	1	0.239186	0.132479	Spcs2	0.801486	0.00962937	1	0.456311	0.597333
												Jkamp	1.29689	0.0338208	1	0.176471	0.122449	Cyyr1	3.68367	0.0289735	1	0.170213	0.0630631	Eps8l2	1.23313	0.0014377	1	0.740458	0.619658	Rpf1	0.571951	0.00969293	1	0.11165	0.197333
												Wdr91	1.54308	0.033905	1	0.141988	0.0975057	Smad5	2.66325	0.0290569	1	0.234043	0.108108	Cluh	1.37106	0.00143839	1	0.478372	0.34188	Fgl2	0.628376	0.00971263	1	0.121359	0.213333
												Stx4a	0.706336	0.0340165	1	0.182556	0.231293	Itgb2	0.654951	0.0290572	1	0.361702	0.585586	Rpl36	1.09764	0.00144825	1	0.974555	0.91453	Phf6	0.455037	0.0097436	1	0.038835	0.101333
												Tnrc6a	1.30428	0.0340295	1	0.269777	0.206349	Rab29	0.503543	0.029061	1	0.170213	0.333333	2210013O21Rik	1.54585	0.0014497	1	0.284987	0.166667	Vps29	0.743433	0.0097627	1	0.31068	0.432
												Id3	1.24614	0.0341272	1	0.330629	0.258503	Sh3bp4	0.581597	0.0291592	1	0.234043	0.432432	1810013L24Rik	2.31928	0.00145083	1	0.183206	0.0940171	Psen1	0.660548	0.00977166	1	0.213592	0.32
												Antxr1	1.47772	0.034128	1	0.158215	0.108844	Heg1	2.13896	0.0291747	1	0.361702	0.198198	Csnk2a1	1.47591	0.00145159	1	0.371501	0.252137	Itgb1bp1	0.795365	0.00979261	1	0.131068	0.232
												Atp2b4	1.18974	0.0342488	1	0.237323	0.172336	Lamc1	2.53455	0.0294081	1	0.191489	0.0720721	AI314180	1.44895	0.00145431	1	0.315522	0.188034	Pdxk	0.662285	0.00983155	1	0.101942	0.186667
												Csnk1a1	0.785366	0.0342578	1	0.348884	0.39229	Brwd1	0.38765	0.0294104	1	0.12766	0.279279	Atp6v0e	1.14663	0.00146726	1	0.870229	0.786325	Dck	0.592586	0.00984079	1	0.150485	0.242667
												Csde1	1.18702	0.0347013	1	0.448276	0.362812	B4galnt1	0.661816	0.0295061	1	0.404255	0.63964	Arhgef28	1.38042	0.00147352	1	0.48855	0.358974	Dcaf11	0.688462	0.00984666	1	0.203883	0.314667
												Rpl36	1.03933	0.0348244	1	0.888438	0.882086	Ccs	0.633617	0.0295076	1	0.297872	0.504505	Zbtb4	1.99626	0.00147988	1	0.203562	0.106838	Bcl2	1.76551	0.00985047	1	0.228155	0.146667
												Dcun1d1	0.713443	0.0349315	1	0.160243	0.208617	9430020K01Rik	4.09726	0.0295213	1	0.12766	0.036036	Cyb5rl	1.77816	0.00149567	1	0.272265	0.166667	Rps27l	0.807552	0.00988287	1	0.529126	0.618667
												Mllt6	1.35403	0.0349645	1	0.192698	0.138322	Ncor1	1.51638	0.0296131	1	0.553191	0.468468	Tmem126a	1.36687	0.0015003	1	0.473282	0.337607	Sdc3	0.5656	0.0100739	1	0.0873786	0.168
												Ppa1	0.690711	0.0350586	1	0.125761	0.172336	Capza2	1.33293	0.0296482	1	0.723404	0.648649	Mplkip	2.12426	0.00151699	1	0.155216	0.0683761	Fut8	0.594011	0.0100744	1	0.0679612	0.144
												Camk2n1	1.34038	0.0351322	1	0.249493	0.195011	Mapre1	1.43869	0.0298126	1	0.659574	0.540541	Dgat2	2.10519	0.00152284	1	0.208651	0.115385	Zfp771	0.51342	0.0100818	1	0.0485437	0.114667
												Eif1b	0.741787	0.035168	1	0.217039	0.265306	Rnf14	0.514901	0.0299621	1	0.212766	0.396396	Ano6	1.60916	0.00152442	1	0.307888	0.188034	Rrad	0.492219	0.0101219	1	0.0436893	0.106667
												Lrrfip1	0.703403	0.0352685	1	0.11359	0.160998	Hectd1	0.597618	0.0300542	1	0.255319	0.495495	Cul7	1.681	0.00152598	1	0.203562	0.102564	Rprd2	0.558365	0.0101305	1	0.116505	0.202667
												Upp1	0.767983	0.0352723	1	0.298174	0.346939	Cops4	0.696703	0.0301387	1	0.404255	0.585586	Arih2	1.82197	0.00152723	1	0.249364	0.145299	Pdzd8	0.396476	0.0101564	1	0.0533981	0.117333
												Arhgef28	1.25126	0.0354041	1	0.310345	0.244898	Rpl18	0.894351	0.0301572	1	0.93617	0.981982	Zbtb7a	1.65545	0.00152977	1	0.330789	0.217949	Atpif1	0.802548	0.0102512	1	0.446602	0.56
												Ube2z	1.37271	0.0354239	1	0.160243	0.111111	Elk4	2.16155	0.0301957	1	0.234043	0.0990991	Tbc1d23	2.3813	0.00154238	1	0.124682	0.0470085	Mlx	0.681556	0.0102551	1	0.169903	0.274667
												Dag1	1.18875	0.0354299	1	0.350913	0.281179	Emp2	4.4747	0.0302012	1	0.12766	0.036036	Dmwd	2.38432	0.00155188	1	0.124682	0.0470085	Rab7b	0.487159	0.0102732	1	0.0776699	0.152
												Tmem63b	1.32665	0.0354622	1	0.212982	0.156463	Stap2	3.32409	0.0302012	1	0.12766	0.036036	Taf1d	1.72995	0.00155595	1	0.251908	0.145299	Psma1	0.766012	0.0103046	1	0.393204	0.52
												Vasn	1.34636	0.0355212	1	0.190669	0.138322	Nup107	0.135085	0.0303867	1	0.0212766	0.135135	Amz2	1.47212	0.00157119	1	0.320611	0.192308	Pa2g4	0.72574	0.0103063	1	0.276699	0.408
												Pde4c	1.22208	0.0355312	1	0.377282	0.303855	Plekhf2	0.382722	0.0304032	1	0.0851064	0.234234	Mlec	1.41127	0.00157258	1	0.458015	0.324786	Camkk2	1.42515	0.0103344	1	0.461165	0.392
												Galnt11	0.712023	0.0356568	1	0.178499	0.226757	Dntt	0.392025	0.0305744	1	0.12766	0.279279	Bri3	1.26341	0.00157558	1	0.73028	0.534188	Sh3bgrl	0.798482	0.0103577	1	0.480583	0.613333
												Cstb	0.878473	0.0357205	1	0.578093	0.596372	Plscr3	2.74993	0.0306167	1	0.276596	0.153153	Bptf	1.61388	0.00157836	1	0.312977	0.200855	Tpm3	0.872699	0.0105148	1	0.713592	0.770667
												Lrrc47	1.36413	0.0359017	1	0.105477	0.0657596	Ulk3	3.03198	0.0306637	1	0.170213	0.0630631	Krit1	1.76736	0.00157913	1	0.24173	0.136752	Abca7	1.36204	0.0105463	1	0.398058	0.301333
												Med28	0.841576	0.0360032	1	0.456389	0.482993	Srp54b	0.550252	0.0307761	1	0.170213	0.351351	Kng2	1.09685	0.0015802	1	0.954198	0.910256	Nrp1	0.682198	0.0105772	1	0.194175	0.304
												Slc16a10	1.42876	0.036052	1	0.119675	0.0770975	Klrk1	0.555594	0.0308176	1	0.212766	0.423423	Atp5k	1.11136	0.00160134	1	0.931298	0.880342	Lpin2	0.611449	0.0106231	1	0.0970874	0.181333
												Il11ra1	0.831374	0.0360966	1	0.332657	0.387755	Bmpr2	2.21943	0.0308552	1	0.255319	0.126126	Mier1	1.43021	0.00160268	1	0.358779	0.230769	Malsu1	0.683005	0.0106404	1	0.160194	0.264
												Ppcs	0.661258	0.0362113	1	0.133874	0.179138	Pvrl2	3.81147	0.0308945	1	0.12766	0.036036	Dnttip2	2.21283	0.00160333	1	0.170483	0.0811966	Med28	0.78491	0.0106431	1	0.427184	0.581333
												Tmem38a	1.42611	0.0362519	1	0.192698	0.14059	Hacl1	3.48245	0.0308945	1	0.12766	0.036036	Rnaseh2a	1.94633	0.00161599	1	0.173028	0.0811966	Tlr13	1.45746	0.0106493	1	0.398058	0.325333
												Fbxo44	0.714603	0.0362577	1	0.184584	0.23356	Thra	3.76307	0.0309249	1	0.191489	0.0810811	Carm1	2.1959	0.00161749	1	0.142494	0.0598291	Zfp24	0.328815	0.0106724	1	0.0436893	0.104
												Sel1l	1.38659	0.0362829	1	0.206897	0.154195	Ctsh	0.753706	0.0309406	1	0.638298	0.846847	Cdk11b	1.59346	0.00161982	1	0.29771	0.179487	Orc3	0.585057	0.0107008	1	0.0485437	0.114667
												Fxn	0.71338	0.0363473	1	0.158215	0.208617	Sp110	0.533873	0.0309642	1	0.191489	0.378378	Apip	1.8129	0.0016238	1	0.277354	0.175214	Ufd1l	0.717065	0.0107557	1	0.160194	0.266667
												Rheb	0.831453	0.0366178	1	0.350913	0.405896	Cdc14a	2.42879	0.0310245	1	0.191489	0.0720721	Fam65a	1.61127	0.00162469	1	0.292621	0.175214	Lmo2	0.570523	0.0107686	1	0.0873786	0.168
												Ndufab1	0.954286	0.0368396	1	0.837728	0.843537	Tnfrsf1a	1.51768	0.0310419	1	0.638298	0.504505	Trim24	1.71701	0.00163092	1	0.231552	0.123932	Gm3839	1.38702	0.0107696	1	0.504854	0.496
												Atg16l2	1.5682	0.0368769	1	0.115619	0.0748299	Pde2a	2.80517	0.0310616	1	0.212766	0.0900901	Bag6	1.3424	0.00164375	1	0.419847	0.277778	Pilrb1	0.69126	0.0108049	1	0.194175	0.298667
												Gsn	1.16511	0.0369761	1	0.464503	0.387755	Trim14	0.322565	0.0310844	1	0.0638298	0.207207	Prdx5	0.974432	0.0016607	1	0.989822	0.982906	Gusb	0.753858	0.0108154	1	0.393204	0.533333
												Slc16a7	1.11143	0.0370397	1	0.697769	0.655329	Tbl1xr1	0.273889	0.0311269	1	0.0638298	0.198198	Jup	1.38788	0.00166432	1	0.480916	0.32906	Dnase1	2.06459	0.010816	1	0.135922	0.072
												Mrpl28	0.830056	0.0370725	1	0.393509	0.439909	App	2.01384	0.0312316	1	0.404255	0.261261	Rap1gap2	1.55867	0.00166957	1	0.346056	0.230769	Hnrnph1	1.32661	0.0108276	1	0.480583	0.392
												Ttc36	0.976202	0.0371503	1	0.348884	0.251701	Rpl7	0.914432	0.0313083	1	0.914894	0.936937	Med19	1.92857	0.00168112	1	0.203562	0.106838	Tmem219	0.74003	0.0108458	1	0.296117	0.429333
												Rmnd1	0.747325	0.0373329	1	0.180527	0.235828	Ttc36	1.63045	0.0313187	1	0.255319	0.108108	Lyrm5	1.43915	0.0016812	1	0.435115	0.307692	Cd40	0.539675	0.0108569	1	0.092233	0.173333
												Bloc1s2	0.632518	0.0373358	1	0.10142	0.145125	Elp5	0.482391	0.0313299	1	0.148936	0.315315	Bahd1	1.74706	0.00168967	1	0.193384	0.0940171	Tmem126a	0.667655	0.0108591	1	0.15534	0.258667
												Rnf14	0.715416	0.0374819	1	0.206897	0.253968	Krcc1	1.43011	0.0315209	1	0.617021	0.477477	Lurap1	1.58278	0.00169228	1	0.335878	0.217949	Tgfb1	0.834328	0.010861	1	0.519417	0.656
												Chd4	1.22374	0.0378572	1	0.409736	0.346939	S100a1	2.16953	0.0316486	1	0.340426	0.198198	Mbnl2	1.26371	0.00169368	1	0.664122	0.564103	Mrps15	0.762729	0.0109001	1	0.237864	0.36
												Cideb	0.581019	0.0379079	1	0.10142	0.14059	Taok2	2.00968	0.0316576	1	0.319149	0.189189	P2rx5	2.18491	0.00169648	1	0.165394	0.0769231	4833420G17Rik	1.85812	0.0109493	1	0.228155	0.154667
												Zdhhc6	0.704921	0.0379086	1	0.178499	0.226757	2210013O21Rik	2.30717	0.0317019	1	0.297872	0.162162	Gpatch11	2.06832	0.00170239	1	0.170483	0.0811966	Zak	0.388728	0.0109791	1	0.0582524	0.125333
												Csnk1e	1.21493	0.0379149	1	0.103448	0.0634921	Cnbp	1.151	0.0317592	1	0.957447	0.918919	Ssfa2	1.42039	0.00170784	1	0.29771	0.175214	Lyn	0.883452	0.0109978	1	0.776699	0.850667
												Slc38a10	1.21062	0.0380978	1	0.356998	0.292517	Cyfip1	0.625947	0.0317745	1	0.382979	0.558559	Socs7	2.56084	0.00172258	1	0.127226	0.0512821	Ino80e	0.65	0.0110269	1	0.169903	0.266667
												Tango2	0.649749	0.0383336	1	0.125761	0.172336	Ugp2	0.317779	0.0318304	1	0.0851064	0.225225	Ppp1r15a	1.35875	0.00174673	1	0.508906	0.367521	Calm1	0.928096	0.0110412	1	0.849515	0.866667
												Smim10l1	0.805361	0.0383559	1	0.326572	0.376417	Psmb3	0.726736	0.0319178	1	0.638298	0.837838	Pxn	1.55713	0.00175808	1	0.335878	0.222222	Rab10os	0.634499	0.011064	1	0.150485	0.248
												Ccdc71	0.645236	0.0383629	1	0.0649087	0.102041	Tmem258	0.778551	0.0319178	1	0.659574	0.828829	Fbxw8	2.48637	0.00178296	1	0.165394	0.0811966	Cox7b	0.823653	0.0111548	1	0.533981	0.650667
												Hnrnpab	1.32377	0.0383682	1	0.286004	0.226757	Rnf122	0.595269	0.0320327	1	0.276596	0.486486	Snf8	2.0946	0.00178435	1	0.201018	0.106838	Aldh9a1	0.725553	0.0111661	1	0.300971	0.418667
												Hist1h2bc	0.799156	0.0384156	1	0.419878	0.435374	Fabp4	2.26654	0.0321347	1	0.297872	0.162162	Gbe1	1.89765	0.00179429	1	0.223919	0.123932	Tmem41b	0.438779	0.0111849	1	0.0631068	0.130667
												Lias	0.676563	0.0384782	1	0.1643	0.208617	Optn	8.75646	0.0321614	1	0.106383	0.027027	Yrdc	2.12998	0.00180404	1	0.147583	0.0641026	Ddt	0.743734	0.0111968	1	0.145631	0.242667
												Mrpl20	0.87839	0.038674	1	0.563895	0.580499	Tshz2	7.33153	0.0321614	1	0.106383	0.027027	Acaa2	1.25056	0.0018192	1	0.712468	0.555556	Isca2	0.671024	0.0112056	1	0.174757	0.277333
												Usmg5	1.0346	0.0387318	1	0.924949	0.918367	Flnb	2.4974	0.0322528	1	0.255319	0.126126	Sec31a	1.37818	0.00182295	1	0.486005	0.350427	Acsl5	0.763711	0.0112204	1	0.31068	0.442667
												Cdadc1	0.608567	0.0390088	1	0.0851927	0.124717	Ndufa3	0.749407	0.0322641	1	0.638298	0.783784	Tsen15	1.64879	0.00183168	1	0.267176	0.15812	Car2	2.83899	0.0112386	1	0.121359	0.064
												Tmem165	1.35767	0.0390993	1	0.119675	0.0770975	Cttnbp2nl	3.37362	0.0323221	1	0.12766	0.036036	Acp6	1.55047	0.00183432	1	0.300254	0.183761	Vps53	0.601565	0.0113085	1	0.145631	0.24
												Commd8	1.33476	0.0391077	1	0.139959	0.0952381	Homer3	3.01867	0.0323221	1	0.12766	0.036036	Phldb2	1.35121	0.00184433	1	0.547074	0.431624	Zfp281	0.500085	0.011356	1	0.0728155	0.144
												Mrpl9	0.758107	0.0395079	1	0.204868	0.256236	Nfix	3.87526	0.0323221	1	0.12766	0.036036	Pitpna	1.69135	0.00184685	1	0.249364	0.145299	Med8	0.740971	0.0113998	1	0.247573	0.370667
												Cic	1.55767	0.039547	1	0.129817	0.0884354	Tcf25	0.717316	0.0323871	1	0.531915	0.738739	Psap	0.901331	0.00184839	1	0.83715	0.794872	Uqcr10	0.838441	0.0114333	1	0.558252	0.650667
												Ncoa2	1.48366	0.0395778	1	0.123732	0.0816327	Malat1	0.883288	0.0323874	1	0.893617	0.972973	Actl6a	1.58457	0.00185347	1	0.272265	0.162393	Cmklr1	0.551438	0.011503	1	0.0631068	0.133333
												Stub1	0.809173	0.0395904	1	0.342799	0.390023	Atp1b1	0.757359	0.0324143	1	0.595745	0.72973	Prkcd	1.45513	0.00186201	1	0.37659	0.252137	Afg3l1	0.776972	0.0115151	1	0.160194	0.266667
												Zfp36	0.699297	0.0397093	1	0.170385	0.217687	Psmd13	1.56298	0.0324443	1	0.553191	0.441441	Tsc22d2	1.97712	0.00186513	1	0.147583	0.0641026	Nhp2l1	0.787531	0.0115344	1	0.466019	0.584
												Psmb2	1.15937	0.0398661	1	0.456389	0.37415	Prmt3	0.347378	0.0324909	1	0.0638298	0.207207	Trappc9	1.8127	0.001867	1	0.203562	0.106838	Slc25a20	0.731658	0.0115354	1	0.169903	0.277333
												Epb41l3	1.39023	0.0399992	1	0.121704	0.0793651	Stambpl1	0.585584	0.0325466	1	0.297872	0.468468	Inmt	1.34461	0.0018673	1	0.236641	0.123932	Cldnd1	0.693256	0.0115392	1	0.184466	0.288
												Atraid	1.18342	0.0400251	1	0.359026	0.278912	Clec14a	2.52444	0.0326362	1	0.212766	0.0900901	Pacsin2	1.3455	0.00186737	1	0.524173	0.380342	Avpi1	0.66718	0.0115556	1	0.169903	0.269333
												Cct2	0.786034	0.0401975	1	0.259635	0.310658	Vps39	2.29193	0.0327306	1	0.255319	0.126126	Taf15	1.63986	0.00187181	1	0.208651	0.111111	Gabarap	0.90482	0.0115682	1	0.781553	0.821333
												Setd1b	1.4383	0.0402581	1	0.11359	0.0725624	Aip	0.544868	0.0327551	1	0.234043	0.423423	Aamdc	1.35959	0.00187367	1	0.503817	0.363248	Acy3	0.572515	0.0116405	1	0.0970874	0.176
												Atp1a1	0.954774	0.0403906	1	0.939148	0.975057	Dgkd	0.534667	0.0328655	1	0.234043	0.396396	Ipcef1	1.93891	0.00187714	1	0.173028	0.0811966	Arl8b	0.755108	0.0116421	1	0.223301	0.349333
												Top2b	1.19058	0.0404059	1	0.184584	0.129252	Crot	0.39738	0.032962	1	0.106383	0.261261	Gm13111	0.647	0.00188591	1	0.333333	0.42735	Gfm1	0.561138	0.0116523	1	0.0728155	0.146667
												Mrpl17	0.84114	0.040444	1	0.446247	0.482993	Lbp	6.48505	0.032975	1	0.106383	0.027027	Kpna1	1.89654	0.00189502	1	0.183206	0.0897436	Ssh3	0.662198	0.0116558	1	0.0825243	0.16
												Usp19	0.698539	0.0404457	1	0.160243	0.208617	Psmb9	0.757711	0.0330865	1	0.617021	0.783784	Pigp	1.31458	0.00189503	1	0.608142	0.448718	Ifngr2	0.821062	0.0116925	1	0.548544	0.64
												Vps53	1.25766	0.0405508	1	0.182556	0.129252	B4galt3	0.415886	0.0331773	1	0.106383	0.27027	Map3k2	1.50481	0.00190357	1	0.333333	0.213675	Ptgr2	0.514572	0.0117167	1	0.0776699	0.149333
												Rad21	1.18949	0.0405732	1	0.326572	0.256236	Ptprc	0.69651	0.0332497	1	0.468085	0.693694	Hoxb3	3.14196	0.00191	1	0.119593	0.0470085	Smchd1	0.708103	0.0117519	1	0.26699	0.381333
												Sucla2	0.851821	0.0406922	1	0.466531	0.510204	Sncg	2.30784	0.0332979	1	0.191489	0.0720721	Sh3d21	2.14135	0.00191999	1	0.16285	0.0769231	Sc5d	0.563629	0.0118008	1	0.0776699	0.152
												Tubb5	0.660564	0.0407589	1	0.0993915	0.14059	Prdx5	0.825763	0.0334572	1	0.787234	0.864865	Ppp1cc	1.51941	0.00192078	1	0.338422	0.226496	Efr3a	0.67561	0.0118098	1	0.203883	0.312
												Gnas	1.07567	0.0410551	1	0.752535	0.730159	Bri3bp	0.634208	0.0334575	1	0.361702	0.558559	Jun	1.25575	0.00193436	1	0.628499	0.444444	Cd300ld	0.769714	0.0118142	1	0.373786	0.501333
												Dlst	0.834635	0.0410665	1	0.407708	0.444444	Plec	1.91511	0.0334971	1	0.404255	0.261261	Fktn	1.85597	0.00194651	1	0.201018	0.106838	Thbd	1.536	0.0119289	1	0.354369	0.274667
												Naa20	0.759937	0.0412089	1	0.261663	0.310658	Tbxa2r	1.99159	0.0335043	1	0.382979	0.252252	Smim4	1.23546	0.00195121	1	0.732824	0.589744	Hebp1	0.758328	0.0119631	1	0.26699	0.394667
												Tonsl	0.814947	0.0413399	1	0.36714	0.405896	Cldnd1	0.647885	0.0335797	1	0.446809	0.630631	Vapb	1.34694	0.00195566	1	0.458015	0.316239	Tbl3	0.567745	0.0119699	1	0.0776699	0.154667
												Lrrc41	1.27712	0.0413614	1	0.15213	0.104308	H2-DMa	0.703895	0.0337138	1	0.425532	0.693694	Fam135a	1.97442	0.00198105	1	0.155216	0.0683761	Yme1l1	0.72798	0.012	1	0.11165	0.202667
												Grn	0.78733	0.041391	1	0.281947	0.333333	Jam3	3.08521	0.0338058	1	0.12766	0.036036	Cwc15	1.26242	0.00198396	1	0.625954	0.461538	Mcee	0.721815	0.0120925	1	0.140777	0.24
												Hipk1	1.37078	0.0414102	1	0.198783	0.147392	Racgap1	0.195085	0.0338863	1	0.0212766	0.135135	Plec	1.49914	0.00198672	1	0.24173	0.136752	Mapk8ip3	0.661857	0.012112	1	0.0825243	0.162667
												B3gnt2	0.737758	0.041417	1	0.133874	0.181406	Dnaja1	0.689041	0.0339014	1	0.510638	0.675676	Snrpf	1.27292	0.0019889	1	0.536896	0.367521	Gadd45gip1	0.708037	0.0121314	1	0.194175	0.301333
												Gbf1	0.65545	0.041948	1	0.0872211	0.126984	Slfn8	0.483677	0.0341126	1	0.12766	0.306306	Ash1l	1.43471	0.00200541	1	0.394402	0.264957	Thumpd3	0.532646	0.0121356	1	0.0776699	0.152
												Pls3	1.24284	0.0419569	1	0.206897	0.147392	Lefty1	0.653303	0.0341691	1	0.382979	0.594595	Ahcy	0.469976	0.00200861	1	0.114504	0.200855	Trappc11	0.536656	0.012145	1	0.0679612	0.138667
												Hdlbp	1.22342	0.0419802	1	0.397566	0.326531	Ublcp1	2.39046	0.0342004	1	0.255319	0.126126	Caprin1	1.31521	0.00202884	1	0.491094	0.354701	Caprin1	0.756667	0.0121587	1	0.315534	0.445333
												mt-Co2	1.01126	0.0421998	1	0.985801	0.997732	Vapb	2.23786	0.0342431	1	0.340426	0.225225	Gm14305	2.69031	0.00203533	1	0.127226	0.0512821	Akna	1.45655	0.0122493	1	0.393204	0.314667
												Prom1	1.2498	0.0422151	1	0.206897	0.14966	Rrm1	2.00211	0.0342787	1	0.212766	0.0900901	Ctdsp1	1.56992	0.0020367	1	0.310433	0.196581	Thbs1	0.760371	0.012253	1	0.300971	0.424
												Foxo1	1.25084	0.0422619	1	0.160243	0.111111	Aldh6a1	2.15904	0.0342787	1	0.212766	0.0900901	Cyld	2.6311	0.00203793	1	0.147583	0.0683761	Padi2	1.68944	0.0123332	1	0.184466	0.112
												Tbcc	0.639249	0.0423715	1	0.0912779	0.131519	Ap2s1	1.56257	0.034525	1	0.531915	0.423423	Tlr3	3.12733	0.00203921	1	0.101781	0.034188	Lnpep	0.632361	0.0123475	1	0.169903	0.266667
												Sh3bgrl	1.32509	0.0424213	1	0.174442	0.124717	Card10	3.21979	0.0345693	1	0.12766	0.036036	Uhmk1	1.73461	0.00204856	1	0.234097	0.132479	Oma1	0.537008	0.0123584	1	0.0533981	0.12
												Gramd3	0.599423	0.042498	1	0.0933063	0.133787	Egln1	6.4389	0.0346552	1	0.106383	0.027027	Gpx4	0.950961	0.00206665	1	0.918575	0.897436	Tmem86a	0.587421	0.0123693	1	0.0970874	0.178667
												Ikbkb	1.23374	0.0426163	1	0.127789	0.0839002	Trib2	7.27886	0.0346552	1	0.106383	0.027027	Baz2a	1.68111	0.00206674	1	0.234097	0.132479	Zc3h3	0.548097	0.0123725	1	0.0679612	0.138667
												Gpr108	1.20819	0.0426267	1	0.247465	0.183673	Deptor	7.5008	0.0346552	1	0.106383	0.027027	Wdr48	2.1301	0.00206798	1	0.173028	0.0854701	Cebpb	1.17506	0.0123774	1	0.752427	0.712
												Tmem60	0.708537	0.0426676	1	0.146045	0.192744	Rabl6	1.86764	0.0347708	1	0.382979	0.243243	Hip1r	1.68083	0.00211163	1	0.292621	0.183761	Emc6	0.77812	0.0124413	1	0.325243	0.456
												Afg3l1	1.31478	0.042689	1	0.200811	0.14966	Hist1h2ap	2.80912	0.0348417	1	0.212766	0.0900901	Mef2d	1.84231	0.00211598	1	0.21883	0.119658	Sp110	0.73196	0.0124438	1	0.242718	0.354667
												Abcc5	1.55635	0.0429272	1	0.119675	0.0793651	Mospd1	0.214705	0.0348417	1	0.0425532	0.162162	Ak2	1.3444	0.00212724	1	0.549618	0.401709	Chp1	0.746099	0.012467	1	0.339806	0.458667
												Rfk	1.23307	0.0429404	1	0.292089	0.226757	Fam13b	0.508663	0.0349637	1	0.12766	0.306306	Fam110a	1.75377	0.0021281	1	0.193384	0.0982906	Lipe	0.691806	0.0125107	1	0.160194	0.261333
												Rbm39	0.877921	0.0430104	1	0.559838	0.605442	Tnfaip3	0.638563	0.0350385	1	0.255319	0.486486	Pgap2	1.69601	0.0021352	1	0.221374	0.119658	Tbc1d9b	0.566	0.0125146	1	0.0873786	0.165333
												Skp1a	0.901754	0.0431647	1	0.576065	0.589569	Hmgcs2	4.95231	0.0355223	1	0.106383	0.027027	Col4a1	1.83948	0.00213637	1	0.223919	0.128205	Shc1	0.725996	0.01254	1	0.179612	0.288
												Tmem87b	1.20063	0.0433634	1	0.133874	0.0884354	Huwe1	0.525454	0.03553	1	0.191489	0.369369	Dedd2	2.08931	0.00213755	1	0.167939	0.0811966	Txnip	1.35778	0.0125588	1	0.5	0.453333
												Hmgcl	0.755482	0.0436535	1	0.196755	0.244898	Ppp1r12c	2.72344	0.0355902	1	0.170213	0.0630631	Yap1	1.75148	0.00213936	1	0.21374	0.115385	Crat	0.557735	0.0125865	1	0.0970874	0.176
												Sfxn2	1.39547	0.0437059	1	0.144016	0.0997732	Sell	0.705628	0.0356641	1	0.510638	0.756757	Cobll1	1.3919	0.00214411	1	0.486005	0.354701	3830406C13Rik	0.664171	0.012592	1	0.106796	0.192
												Commd10	0.661267	0.043789	1	0.10142	0.142857	Ecm1	1.98202	0.0357123	1	0.191489	0.0720721	Ube2m	1.50955	0.00214898	1	0.368957	0.24359	Pycrl	0.603034	0.012625	1	0.0728155	0.146667
												Cgnl1	1.2029	0.0437936	1	0.3286	0.263039	Tspan13	0.735303	0.0357728	1	0.595745	0.810811	Ptprm	2.89911	0.00215035	1	0.101781	0.034188	Tmem9b	0.763827	0.0126304	1	0.315534	0.450667
												Vps37b	1.44734	0.0440985	1	0.109533	0.0702948	Cdk17	4.64941	0.0358054	1	0.148936	0.0540541	1500011B03Rik	1.36331	0.00216535	1	0.508906	0.380342	Atf6b	0.74805	0.0127225	1	0.281553	0.402667
												Emd	0.619757	0.0441505	1	0.0993915	0.138322	Sms	0.657639	0.0358545	1	0.446809	0.585586	Smad6	1.81697	0.00217021	1	0.147583	0.0641026	Prelid1	0.813293	0.0127234	1	0.538835	0.661333
												Atp5l	1.02441	0.0442097	1	0.935091	0.922902	Dnajc10	1.70742	0.0359066	1	0.425532	0.279279	Eri3	1.4173	0.00219135	1	0.305344	0.183761	Znhit1	0.799004	0.0128445	1	0.412621	0.541333
												Zmynd8	1.35776	0.044313	1	0.162272	0.115646	Marcksl1	2.34249	0.0359913	1	0.212766	0.0900901	Ltbp3	1.82827	0.00221322	1	0.170483	0.0811966	Sys1	0.764573	0.0128669	1	0.194175	0.306667
												Cnot10	1.35133	0.0444583	1	0.109533	0.0702948	Cog2	0.322808	0.0361201	1	0.0638298	0.198198	Tmbim6	0.961417	0.00222475	1	0.946565	0.880342	2022-03-02	0.779404	0.0128902	1	0.320388	0.453333
												Calm2	0.893888	0.0446331	1	0.553753	0.582766	Ago4	4.65172	0.0364079	1	0.106383	0.027027	Usp16	1.68126	0.00223716	1	0.305344	0.200855	Mfsd1	0.739042	0.0129683	1	0.339806	0.456
												Chmp6	0.718927	0.0447494	1	0.196755	0.244898	1700008J07Rik	4.55896	0.0364079	1	0.106383	0.027027	Ikzf5	2.68387	0.00225004	1	0.114504	0.042735	U2af1	0.772536	0.0129883	1	0.378641	0.498667
												Ttc4	1.55195	0.0447966	1	0.11359	0.0748299	Vwa8	5.72865	0.0364079	1	0.106383	0.027027	Arf3	1.56274	0.00225671	1	0.312977	0.200855	Copg1	0.716189	0.0130948	1	0.18932	0.296
												Mapk3	1.3635	0.0449049	1	0.160243	0.113379	Slc33a1	0.348438	0.0365108	1	0.0638298	0.207207	Ddx17	1.44299	0.00226697	1	0.363868	0.239316	Gns	0.798851	0.0131158	1	0.300971	0.429333
												Hacd2	0.770782	0.0449523	1	0.172414	0.222222	Nup50	0.420542	0.0365108	1	0.0638298	0.207207	Arl4a	1.3846	0.0022828	1	0.435115	0.303419	Scnn1a	1.70839	0.0131158	1	0.252427	0.176
												Cux1	0.797783	0.0450016	1	0.310345	0.360544	Rab35	2.3146	0.0365781	1	0.212766	0.0900901	Tpi1	0.937899	0.00230153	1	0.905852	0.867521	Apoe	1.14641	0.0131754	1	0.757282	0.722667
												Tmem86a	1.23512	0.0450165	1	0.25355	0.195011	Tor1aip1	0.578051	0.0366101	1	0.297872	0.495495	Plxnb1	1.82334	0.00230202	1	0.180662	0.0897436	Dctn5	0.738933	0.0131896	1	0.194175	0.296
												Mfn2	0.811897	0.0450773	1	0.306288	0.360544	Kdm3b	2.0904	0.0366447	1	0.234043	0.108108	Fance	1.87506	0.0023148	1	0.201018	0.106838	Luc7l3	0.737264	0.0131981	1	0.213592	0.322667
												Kdm2a	1.40517	0.0450956	1	0.137931	0.0952381	Foxr1	0.380109	0.036655	1	0.0638298	0.198198	Pnpla7	1.86919	0.00232819	1	0.152672	0.0683761	Arhgap25	0.571003	0.0132027	1	0.11165	0.194667
												Sdf2l1	0.646738	0.0451246	1	0.0912779	0.131519	Selplg	0.753093	0.0370442	1	0.553191	0.738739	Cml1	1.7976	0.00233052	1	0.206107	0.111111	Ppp2r1b	0.592552	0.0132856	1	0.0679612	0.138667
												Cltc	0.800684	0.0453347	1	0.318458	0.360544	Palm	1.64708	0.0371382	1	0.425532	0.279279	Ehmt1	1.63333	0.0023343	1	0.262087	0.149573	Msrb1	1.10164	0.0133188	1	0.825243	0.808
												Mccc1	1.21557	0.0455573	1	0.344828	0.278912	Ddx31	4.05561	0.0373122	1	0.106383	0.027027	Tarm1	1.68945	0.00233989	1	0.231552	0.128205	Pitpnm1	1.47653	0.0133212	1	0.402913	0.341333
												Mrpl36	0.785854	0.0455894	1	0.263692	0.310658	2900026A02Rik	4.80201	0.0373122	1	0.106383	0.027027	Smarcd3	1.63626	0.00234039	1	0.221374	0.123932	Icam1	0.791302	0.0133897	1	0.252427	0.376
												Klhdc3	1.44061	0.0458783	1	0.160243	0.115646	Tcaf1	4.61188	0.0373122	1	0.106383	0.027027	Pex11a	1.89522	0.00234974	1	0.21883	0.123932	Ptprj	1.38377	0.0133946	1	0.480583	0.410667
												Edf1	0.947186	0.0459776	1	0.760649	0.746032	Epn2	2.36644	0.0376043	1	0.170213	0.0630631	Pan2	2.62004	0.00235055	1	0.101781	0.034188	Tgfbr2	0.676818	0.0134	1	0.194175	0.301333
												Kdm6b	1.29101	0.046172	1	0.166329	0.117914	Acbd4	2.56547	0.0376043	1	0.170213	0.0630631	Sf1	1.35833	0.00235219	1	0.46056	0.311966	Yif1b	0.665492	0.0134103	1	0.150485	0.245333
												Lama5	1.26963	0.0461898	1	0.21501	0.160998	Prr5	0.402959	0.0376349	1	0.12766	0.27027	Ankrd13a	2.09204	0.00235283	1	0.16285	0.0769231	Mef2a	1.30765	0.0134283	1	0.548544	0.501333
												Mapt	0.641027	0.0465591	1	0.117647	0.15873	Slpi	0.586412	0.0378414	1	0.276596	0.45045	Rhno1	1.65083	0.00235644	1	0.19084	0.0940171	Smu1	0.819214	0.0134798	1	0.23301	0.368
												Sec22a	1.30038	0.0465825	1	0.115619	0.0748299	Fam122a	0.32367	0.0379109	1	0.0425532	0.171171	Eva1b	1.31839	0.00236333	1	0.470738	0.316239	Lfng	0.836331	0.0135279	1	0.286408	0.432
												Prr13	0.771441	0.0466316	1	0.336714	0.37415	Cytip	0.72884	0.0382017	1	0.510638	0.693694	D5Ertd579e	1.45427	0.00236946	1	0.328244	0.213675	Fundc2	0.642176	0.0135725	1	0.11165	0.2
												Ganc	1.46508	0.0467634	1	0.1643	0.120181	Trim46	3.69795	0.0382356	1	0.106383	0.027027	Pard3	1.74144	0.00236983	1	0.183206	0.0897436	Vcpip1	0.693292	0.0136154	1	0.126214	0.218667
												Zswim8	1.36889	0.0467877	1	0.139959	0.0975057	Fhl1	1.85762	0.0382745	1	0.191489	0.0720721	G3bp1	1.49292	0.00237557	1	0.343511	0.226496	Plin3	0.683473	0.0136952	1	0.145631	0.242667
												Cbr1	1.23746	0.0467929	1	0.314402	0.249433	Asph	0.580252	0.038282	1	0.234043	0.432432	Ubp1	2.00997	0.00238298	1	0.193384	0.102564	Sar1a	0.788447	0.013723	1	0.286408	0.413333
												Mtif3	0.696688	0.0469243	1	0.121704	0.165533	Dclre1c	0.61458	0.0386795	1	0.276596	0.477477	Tns3	1.82633	0.00238785	1	0.185751	0.0940171	Daxx	0.609663	0.0138033	1	0.18932	0.28
												D1Ertd622e	1.26541	0.0473583	1	0.208925	0.156463	Nisch	1.6013	0.0386925	1	0.468085	0.333333	Ehf	1.98367	0.0023917	1	0.167939	0.0811966	Fau	1.01687	0.0138141	1	0.936893	0.936
												Slc9a2	0.640806	0.0474598	1	0.0750507	0.111111	Dock9	4.1866	0.0387149	1	0.148936	0.0540541	Hspa14	1.61857	0.00239352	1	0.259542	0.153846	Ube2l6	0.681169	0.0138643	1	0.140777	0.237333
												Ndufa6	0.955855	0.0476972	1	0.862069	0.877551	D8Ertd738e	0.797784	0.0389109	1	0.723404	0.801802	Dcaf11	1.27595	0.00239405	1	0.562341	0.418803	Prr5l	0.54462	0.0138744	1	0.092233	0.170667
												Hsdl2	0.757733	0.0477201	1	0.233266	0.278912	Thbd	2.1858	0.0389327	1	0.234043	0.108108	Sharpin	1.57004	0.00240087	1	0.315522	0.205128	Klf3	1.30352	0.0138873	1	0.548544	0.498667
												mt-Co3	1.01949	0.0482205	1	0.993915	0.988662	Stom	1.90327	0.038939	1	0.191489	0.0720721	Btaf1	2.69746	0.00240571	1	0.119593	0.0470085	Aqr	0.615327	0.0139418	1	0.0873786	0.162667
												Aldh5a1	0.760552	0.0485563	1	0.10142	0.145125	Ddx39b	0.725842	0.0390993	1	0.553191	0.702703	Tardbp	1.40235	0.00241933	1	0.424936	0.294872	Fuca2	0.602241	0.0139754	1	0.160194	0.253333
												Ppia	0.95929	0.0486701	1	0.924949	0.941043	Trim12a	0.546229	0.0391484	1	0.212766	0.396396	Wbp5	1.23917	0.00242048	1	0.689567	0.525641	Upb1	2.49974	0.0139866	1	0.126214	0.0693333
												Prrc2a	1.18916	0.048693	1	0.3286	0.260771	Camsap2	3.7906	0.0391784	1	0.106383	0.027027	Setd5	1.77193	0.00244203	1	0.223919	0.123932	Plekhg3	0.673002	0.0140249	1	0.126214	0.216
												Senp3	1.42713	0.0487781	1	0.115619	0.0770975	Spsb1	3.41348	0.0391784	1	0.106383	0.027027	Rab24	1.44388	0.00244816	1	0.374046	0.252137	Spp1	1.90253	0.0140318	1	0.101942	0.048
												Rap1gap2	1.16614	0.0488691	1	0.296146	0.231293	Zfp2	3.76893	0.0391784	1	0.106383	0.027027	Rpl38	1.1035	0.00246061	1	0.94402	0.884615	Eef1d	0.824507	0.0140606	1	0.533981	0.645333
												Mterf3	0.601452	0.0489211	1	0.0892495	0.126984	Socs5	4.31376	0.0391784	1	0.106383	0.027027	Ccdc174	1.6533	0.00246916	1	0.221374	0.123932	Acer3	0.787598	0.0141428	1	0.427184	0.562667
												Zfp523	1.35403	0.0489431	1	0.129817	0.0884354	Fam53c	0.425398	0.0392326	1	0.0638298	0.207207	Dlec1	1.28726	0.00247731	1	0.407125	0.277778	Hmox2	0.762098	0.014147	1	0.373786	0.485333
												Macrod2	0.566418	0.0489898	1	0.0831643	0.117914	Ubc	0.85042	0.0392385	1	0.87234	0.972973	Fosb	1.70717	0.00249397	1	0.330789	0.230769	Rasgef1b	0.596356	0.0141671	1	0.0970874	0.173333
												Slc6a8	1.24911	0.0490666	1	0.294118	0.23356	Twsg1	2.14319	0.0392542	1	0.191489	0.0810811	Dctpp1	1.41126	0.00250372	1	0.417303	0.290598	Bhlhe40	1.45334	0.0143002	1	0.402913	0.336
												P3h2	1.1753	0.0490737	1	0.425963	0.351474	Dlg4	2.57812	0.039466	1	0.12766	0.036036	AW549877	1.65996	0.00251867	1	0.307888	0.200855	Trappc5	0.721126	0.0143351	1	0.169903	0.272
												Plekha7	1.31621	0.0491857	1	0.176471	0.126984	Sik1	0.65232	0.0395167	1	0.361702	0.576577	Slc30a5	1.55911	0.00252226	1	0.328244	0.213675	Cd3eap	0.466153	0.0144404	1	0.0436893	0.104
												Spcs2	1.21851	0.049203	1	0.340771	0.276644	Cd8b1	0.350445	0.0395806	1	0.12766	0.27027	Rdx	1.31008	0.00252352	1	0.53944	0.41453	Atp5f1	0.86519	0.0144473	1	0.635922	0.72
												Pfkl	0.672733	0.0494452	1	0.200811	0.240363	Pls3	2.15984	0.0395925	1	0.340426	0.225225	Mcur1	1.2616	0.00252878	1	0.636132	0.508547	Gapdh	1.10479	0.0144483	1	0.834951	0.829333
												Tigd2	1.31393	0.049492	1	0.144016	0.0997732	Kmt2c	0.491249	0.0397921	1	0.191489	0.36036	Mtf1	2.11262	0.00253344	1	0.19084	0.102564	Txndc11	0.684162	0.0144822	1	0.101942	0.181333
												Hoxb8	1.18588	0.0496217	1	0.322515	0.249433	Pnrc1	0.710679	0.0398426	1	0.553191	0.702703	Zbtb21	3.03724	0.00254172	1	0.122137	0.0512821	Gorasp2	0.756611	0.0145426	1	0.334951	0.453333
												Slc9a3r1	0.774116	0.0498158	1	0.255578	0.301587	Gm10073	0.445126	0.0398836	1	0.12766	0.279279	Cflar	1.67749	0.00254503	1	0.274809	0.166667	Atp5d	0.878794	0.0145429	1	0.728155	0.797333
												Brd3	1.50991	0.0498834	1	0.144016	0.102041	Utp11l	1.69766	0.0399418	1	0.425532	0.297297	Rilpl2	1.73183	0.00257992	1	0.21883	0.119658	Stx5a	0.829072	0.0146248	1	0.218447	0.338667
												Atp5j2	0.980221	0.0499933	1	0.935091	0.93424	Plxdc1	0.600162	0.0399465	1	0.234043	0.432432	Mrps10	1.51104	0.00258626	1	0.371501	0.252137	Oaz2	1.69046	0.0146571	1	0.237864	0.165333
																		Efhd2	0.361879	0.0400084	1	0.0638298	0.198198	Son	1.28643	0.00258667	1	0.628499	0.470085	Ubp1	1.82619	0.0146618	1	0.199029	0.130667
																		Sec14l1	2.83275	0.0400565	1	0.255319	0.135135	Sox4	1.56981	0.00259001	1	0.318066	0.205128	Vipas39	0.629916	0.0146723	1	0.0873786	0.165333
																		Sec61g	0.858881	0.0400685	1	0.851064	0.918919	Mavs	1.32287	0.00259087	1	0.529262	0.388889	Hdac5	0.771775	0.0146809	1	0.203883	0.312
																		Agtpbp1	4.16531	0.0401408	1	0.106383	0.027027	Dalrd3	1.40475	0.00260952	1	0.389313	0.25641	Arrdc4	1.72057	0.0146822	1	0.23301	0.165333
																		Micall1	2.69781	0.0401408	1	0.106383	0.027027	Lpin1	1.74407	0.00261565	1	0.211196	0.115385	Grk5	1.62369	0.0148639	1	0.247573	0.170667
																		Dapp1	0.438005	0.0402168	1	0.148936	0.297297	Mrps11	1.38104	0.00261907	1	0.37659	0.25641	Casp8	0.722321	0.0148687	1	0.286408	0.392
																		Map3k7	3.45321	0.0402435	1	0.148936	0.0540541	Uhrf2	1.98708	0.00262428	1	0.201018	0.111111	Gpr146	0.586633	0.0148901	1	0.0970874	0.176
																		Rps26	0.913991	0.0403515	1	0.957447	0.963964	Zdhhc20	1.75692	0.00262697	1	0.231552	0.132479	Clec4a2	0.72463	0.0148935	1	0.291262	0.389333
																		Efemp2	2.55175	0.04044	1	0.170213	0.0630631	Cep164	1.60981	0.00263392	1	0.246819	0.141026	Upf3b	0.507013	0.0149232	1	0.0679612	0.136
																		Stk11ip	0.146995	0.04044	1	0.0212766	0.126126	Suco	1.88208	0.00263445	1	0.183206	0.0940171	Tmem128	0.816103	0.0149457	1	0.305825	0.453333
																		Rpl12	0.898162	0.0405259	1	0.87234	0.873874	Eya3	2.77574	0.00264918	1	0.111959	0.042735	Pira2	0.718449	0.014995	1	0.18932	0.290667
																		Psma3	0.771403	0.0406985	1	0.617021	0.720721	Rb1	1.46944	0.00264989	1	0.262087	0.149573	Emg1	0.761025	0.0150187	1	0.393204	0.52
																		Arhgef6	0.63944	0.0408791	1	0.340426	0.558559	Etf1	1.46919	0.00266558	1	0.343511	0.226496	Fdx1	0.707858	0.0150441	1	0.0728155	0.144
																		Evi5	0.447327	0.0409469	1	0.0638298	0.207207	Dpp9	1.48913	0.0026689	1	0.188295	0.0940171	Klrk1	0.530219	0.0150952	1	0.0533981	0.117333
																		Tmem47	2.68919	0.0411231	1	0.106383	0.027027	Dimt1	1.83326	0.00269114	1	0.145038	0.0641026	Ndufv2	0.808198	0.0151421	1	0.446602	0.576
																		Tead2	3.65674	0.0411231	1	0.106383	0.027027	Tmem61	0.445034	0.00269542	1	0.0661578	0.136752	Ptp4a1	1.27634	0.0151663	1	0.582524	0.578667
																		Lcp1	0.722561	0.0411254	1	0.510638	0.684685	Me3	0.827126	0.00271452	1	0.631043	0.662393	Atp6v1h	0.731756	0.0151747	1	0.203883	0.32
																		Bcl7a	0.149653	0.0411766	1	0.0212766	0.126126	Hpcal1	1.30644	0.00271663	1	0.554707	0.393162	Rnf41	0.666788	0.0152	1	0.174757	0.269333
																		Stk40	2.84381	0.0412679	1	0.191489	0.0810811	Gfpt1	1.61899	0.00272479	1	0.254453	0.149573	Ubxn4	0.776996	0.0152276	1	0.320388	0.437333
																		Rap1a	0.744456	0.0413919	1	0.638298	0.810811	Srp9	1.22391	0.00274204	1	0.725191	0.594017	Cgrrf1	0.525138	0.0152306	1	0.0582524	0.122667
																		Uchl5	0.500804	0.041503	1	0.170213	0.324324	Rab11fip2	2.1148	0.00275105	1	0.142494	0.0641026	Pxn	0.82437	0.0152384	1	0.34466	0.48
																		Tprgl	1.86858	0.0415538	1	0.361702	0.234234	1300002E11Rik	1.50342	0.00275434	1	0.348601	0.230769	Sult1d1	1.80092	0.0152441	1	0.150485	0.0853333
																		Traf6	0.23336	0.041573	1	0.0425532	0.162162	Pde7a	1.79209	0.00276831	1	0.173028	0.0854701	Eif2b4	0.645763	0.015266	1	0.0825243	0.157333
																		Plek	0.609413	0.0417286	1	0.340426	0.522523	D130020L05Rik	1.89396	0.00277118	1	0.183206	0.0940171	Noc2l	0.626743	0.0152721	1	0.092233	0.168
																		Cyb5r1	3.94789	0.0418229	1	0.148936	0.0540541	Ncald	1.60501	0.0027795	1	0.157761	0.0726496	Cd274	1.94426	0.0152823	1	0.169903	0.104
																		Fam98c	0.553249	0.042015	1	0.297872	0.45045	Crip2	1.19193	0.00278016	1	0.814249	0.705128	Dnajb9	0.645312	0.0152858	1	0.18932	0.28
																		Ensa	0.527548	0.0420902	1	0.212766	0.378378	Bcl2l2	1.67799	0.00278022	1	0.234097	0.132479	Cops3	0.660286	0.0153309	1	0.106796	0.189333
																		Kif3b	3.23727	0.0421258	1	0.106383	0.027027	Plxnb2	1.33889	0.00279737	1	0.503817	0.358974	Epn1	0.816083	0.0153327	1	0.524272	0.698667
																		Ccdc137	3.08543	0.0421258	1	0.106383	0.027027	Slc6a8	1.35182	0.00280527	1	0.351145	0.226496	Ier3	0.77384	0.015377	1	0.252427	0.365333
																		Uqcrq	0.851474	0.0421423	1	0.829787	0.927928	Sdpr	1.57971	0.00280653	1	0.305344	0.196581	Pes1	0.688932	0.0153794	1	0.223301	0.328
																		2310039H08Rik	0.35255	0.0421874	1	0.106383	0.243243	Fam110c	3.33345	0.0028228	1	0.119593	0.0512821	Camta1	0.53668	0.0153912	1	0.0728155	0.144
																		Atp2a1	0.662822	0.0422935	1	0.404255	0.603604	Actn4	1.2469	0.00282773	1	0.643766	0.504274	Ddx58	0.626223	0.0153954	1	0.0776699	0.152
																		Ccdc90b	1.876	0.042321	1	0.340426	0.207207	Traf5	1.77327	0.00283174	1	0.183206	0.0940171	Szrd1	0.735466	0.0154079	1	0.276699	0.381333
																		Srd5a3	0.671574	0.0423744	1	0.148936	0.342342	Sumo3	1.40833	0.00283938	1	0.399491	0.273504	Mrps30	0.606152	0.0154332	1	0.121359	0.202667
																		Wdr45b	0.494227	0.0424248	1	0.12766	0.279279	Eif1ax	1.29339	0.00284491	1	0.506361	0.363248	Usb1	0.656952	0.0154426	1	0.140777	0.232
																		Gnpda2	2.1813	0.0425377	1	0.276596	0.144144	Copg2	1.75778	0.00285014	1	0.19084	0.0982906	Mob3c	0.587285	0.0155136	1	0.0582524	0.125333
																		Tram1	0.709914	0.042682	1	0.468085	0.63964	Exoc8	2.60693	0.0028781	1	0.111959	0.042735	AU040320	0.441404	0.0155183	1	0.0533981	0.114667
																		Cep97	0.178152	0.042684	1	0.0212766	0.126126	Bbx	1.66392	0.00288461	1	0.277354	0.175214	Lsm12	0.763233	0.0155252	1	0.291262	0.418667
																		Timp2	0.586739	0.0428656	1	0.234043	0.423423	Srsf10	1.4463	0.0029205	1	0.430025	0.307692	Rassf1	0.738535	0.0156192	1	0.364078	0.482667
																		Unk	0.248573	0.0429083	1	0.0425532	0.162162	Tnpo2	2.48923	0.00292326	1	0.13486	0.0598291	Timm13	0.799323	0.0156224	1	0.490291	0.594667
																		Tacc1	1.47901	0.0429089	1	0.553191	0.414414	Ppm1b	1.56025	0.00293991	1	0.234097	0.132479	BC028528	0.791746	0.0156291	1	0.5	0.573333
																		Prosc	0.468803	0.0429491	1	0.12766	0.279279	Iqcb1	2.36716	0.00298552	1	0.111959	0.042735	Snx8	0.578724	0.015682	1	0.0485437	0.109333
																		Tmbim6	0.919384	0.0431146	1	0.893617	0.900901	Atp5g1	1.09018	0.00298849	1	0.984733	0.92735	H13	0.815826	0.0157386	1	0.529126	0.648
																		Zbtb40	2.41264	0.0431491	1	0.106383	0.027027	Nf1	1.91901	0.00299012	1	0.119593	0.0470085	Fam207a	0.619621	0.0158089	1	0.0970874	0.176
																		Scarf1	3.3615	0.0431491	1	0.106383	0.027027	Snrnp70	1.35175	0.00299593	1	0.48855	0.34188	Txnl1	0.777817	0.0158144	1	0.305825	0.442667
																		Ero1lb	0.575538	0.0431512	1	0.234043	0.414414	1810014B01Rik	2.03624	0.00301377	1	0.152672	0.0726496	Toporsos	1.99839	0.0158692	1	0.199029	0.130667
																		Tapbp	0.79591	0.0431659	1	0.744681	0.846847	F11r	1.70979	0.00303445	1	0.229008	0.132479	Ctsd	0.795904	0.0160014	1	0.461165	0.570667
																		Plcb3	2.10283	0.0433684	1	0.191489	0.0810811	Map2k4	1.66376	0.00303793	1	0.165394	0.0769231	Mina	0.575793	0.0160662	1	0.0728155	0.144
																		H2-K1	0.894531	0.0434165	1	0.93617	0.981982	Jak3	1.67422	0.00304422	1	0.259542	0.15812	Stk19	0.630049	0.0160992	1	0.106796	0.189333
																		Gypc	3.31435	0.0434545	1	0.148936	0.0540541	Uhrf1bp1l	1.36121	0.00305117	1	0.389313	0.260684	Slc20a1	0.629696	0.0161389	1	0.0631068	0.130667
																		Rps15	0.871351	0.0435087	1	0.851064	0.918919	Kcp	1.68688	0.00305535	1	0.201018	0.106838	Selenbp1	1.58342	0.0161869	1	0.291262	0.213333
																		Ddx1	2.66796	0.0436124	1	0.212766	0.0990991	Mdfic	1.81853	0.00305623	1	0.155216	0.0726496	Eif4b	0.815495	0.0162368	1	0.480583	0.597333
																		Eif5a	0.874858	0.0437068	1	0.87234	0.90991	Gtf3c2	1.99514	0.00307572	1	0.19084	0.102564	Fos	1.0495	0.0163467	1	0.883495	0.914667
																		Ftx	0.58408	0.0437155	1	0.148936	0.333333	1500011K16Rik	1.29933	0.00308099	1	0.564885	0.42735	Krcc1	0.786965	0.0163597	1	0.291262	0.426667
																		Zfyve21	0.313357	0.0438039	1	0.0638298	0.189189	Zfp672	1.52247	0.00308722	1	0.335878	0.222222	Zc3h12d	0.494572	0.0163699	1	0.0533981	0.114667
																		Tbl1x	0.547233	0.0442629	1	0.170213	0.36036	Phyhipl	1.37611	0.00310521	1	0.381679	0.252137	Arf2	0.750349	0.0164193	1	0.252427	0.368
																		Maml2	3.16939	0.0442902	1	0.148936	0.0540541	Kctd2	3.07151	0.00310794	1	0.109415	0.042735	Unc119b	0.545171	0.0164382	1	0.0582524	0.122667
																		Dennd3	2.63733	0.0442902	1	0.148936	0.0540541	Pum1	1.56271	0.00311049	1	0.292621	0.183761	Cox19	0.722252	0.0165055	1	0.140777	0.237333
																		Sec22b	0.550978	0.0445099	1	0.191489	0.351351	Zfp318	1.99285	0.003123	1	0.160305	0.0769231	Commd1	0.767652	0.01653	1	0.257282	0.362667
																		Hspg2	2.03965	0.0445277	1	0.234043	0.108108	Hypk	1.44145	0.00312767	1	0.29771	0.179487	Snrpd3	0.781322	0.0166065	1	0.402913	0.525333
																		Tnfrsf13b	0.703059	0.0445747	1	0.425532	0.648649	Dynlt1b	1.31276	0.00312803	1	0.564885	0.405983	Snx9	0.57247	0.0166966	1	0.0970874	0.173333
																		Vamp2	0.623444	0.0445759	1	0.404255	0.540541	Rbbp8	1.76269	0.00314932	1	0.183206	0.0940171	Cd9	1.34411	0.0167247	1	0.393204	0.296
																		Ocel1	0.700492	0.0447444	1	0.510638	0.648649	Efcab2	2.03084	0.0031528	1	0.157761	0.0769231	Map4k1	0.749695	0.0167507	1	0.208738	0.312
																		Tmem242	0.590522	0.0448622	1	0.170213	0.333333	Cep350	1.77917	0.00315681	1	0.183206	0.0940171	Vps36	0.714749	0.016756	1	0.208738	0.32
																		5430427O19Rik	0.577942	0.0450701	1	0.212766	0.405405	Lrrcc1	1.94916	0.00316584	1	0.175573	0.0897436	Csrnp1	0.797149	0.0168207	1	0.296117	0.421333
																		Pafah1b2	1.83567	0.0451035	1	0.361702	0.216216	Tmem231	2.79633	0.0031733	1	0.104326	0.0384615	Wdr45b	0.63943	0.0168983	1	0.15534	0.250667
																		Copz2	2.69767	0.0451395	1	0.148936	0.0540541	Spin1	1.69829	0.00317439	1	0.226463	0.128205	Plekhg2	0.562241	0.016905	1	0.0631068	0.128
																		Rpgrip1	0.67362	0.045216	1	0.361702	0.621622	Eps15l1	1.58048	0.00317707	1	0.239186	0.136752	Dync1h1	0.758509	0.0169665	1	0.334951	0.445333
																		Stt3b	0.549781	0.0454134	1	0.255319	0.414414	Map7d1	2.35668	0.00318059	1	0.139949	0.0641026	RP23-402A4.1	0.474473	0.0170163	1	0.0679612	0.133333
																		Churc1	0.699457	0.0454198	1	0.468085	0.630631	Ass1	1.16147	0.00321345	1	0.46056	0.294872	Golga1	0.544038	0.0170218	1	0.0436893	0.101333
																		Tfb2m	2.65732	0.0455586	1	0.191489	0.0810811	Zmynd11	1.4696	0.00322713	1	0.366412	0.247863	Cdc42ep3	1.37507	0.0170606	1	0.446602	0.384
																		Hspb11	0.328918	0.045688	1	0.0425532	0.162162	Tmem181a	1.57991	0.00324007	1	0.21883	0.119658	Atp6v1b2	0.817494	0.0170799	1	0.538835	0.621333
																		Gm6377	0.3059	0.0457502	1	0.0638298	0.189189	Magohb	1.78942	0.00324737	1	0.173028	0.0854701	Rnf169	2.52767	0.0171776	1	0.121359	0.0666667
																		AB124611	0.449523	0.0459375	1	0.12766	0.27027	2022-03-02	1.71042	0.00325453	1	0.282443	0.179487	Pef1	0.696752	0.017187	1	0.131068	0.221333
																		Zfp672	3.15336	0.0460025	1	0.148936	0.0540541	Ndufa4	0.982807	0.0032634	1	0.977099	0.952991	Tiprl	0.698714	0.0172728	1	0.140777	0.234667
																		Gsr	2.14659	0.0460243	1	0.340426	0.207207	Sfswap	1.56937	0.00327161	1	0.203562	0.106838	Ssbp1	0.710285	0.0172756	1	0.194175	0.296
																		Stat1	0.676223	0.0461123	1	0.446809	0.594595	Dock7	1.61623	0.00328039	1	0.165394	0.0811966	Ankzf1	0.610925	0.0172764	1	0.0436893	0.101333
																		Lasp1	1.78292	0.0464088	1	0.425532	0.288288	Ankzf1	2.38504	0.00331417	1	0.145038	0.0683761	Map3k3	1.66934	0.0173473	1	0.23301	0.162667
																		Smim8	0.328499	0.0464149	1	0.0638298	0.189189	Stx3	1.89928	0.00334833	1	0.183206	0.0982906	Iws1	0.645679	0.0173707	1	0.0631068	0.130667
																		Gtf2f2	0.332994	0.0464149	1	0.0638298	0.189189	Zfp467	1.29185	0.0033673	1	0.534351	0.41453	Rbks	1.82958	0.0173941	1	0.179612	0.114667
																		Cd8a	0.247344	0.0465374	1	0.0638298	0.18018	Dync1h1	1.28927	0.00337928	1	0.569975	0.440171	Htatip2	0.589338	0.0174285	1	0.126214	0.208
																		Gpr132	0.584211	0.046613	1	0.234043	0.423423	Pip5k1a	1.85186	0.00338959	1	0.188295	0.0982906	Dennd2d	2.60869	0.0174788	1	0.126214	0.072
																		Madd	1.99607	0.0468	1	0.255319	0.126126	Ak3	1.21932	0.00342065	1	0.727735	0.602564	Leo1	0.626792	0.0174932	1	0.0533981	0.117333
																		Kcnn4	3.20338	0.0468793	1	0.148936	0.0540541	Ier5l	1.88848	0.00342452	1	0.147583	0.0683761	Ttc9c	0.669942	0.0175207	1	0.092233	0.170667
																		Mettl25	2.67878	0.0468793	1	0.148936	0.0540541	Hmgn2	1.27776	0.00342582	1	0.592875	0.452991	Slc15a4	0.801622	0.0175576	1	0.305825	0.432
																		Arhgef1	0.680743	0.0469175	1	0.361702	0.612613	Rpl10	1.19062	0.00342687	1	0.814249	0.692308	Rps19	1.03106	0.01759	1	0.893204	0.890667
																		Fscn1	3.14804	0.0469206	1	0.170213	0.0720721	Sorbs3	1.4811	0.00343289	1	0.335878	0.222222	Nap1l4	0.744908	0.0176515	1	0.208738	0.314667
																		Mzt2	3.41723	0.0469206	1	0.170213	0.0720721	Arhgap1	1.83389	0.00344179	1	0.183206	0.0940171	Stk11	0.739946	0.0176519	1	0.160194	0.256
																		Gsto1	2.99899	0.0469206	1	0.170213	0.0720721	Fam102a	1.52376	0.00344195	1	0.274809	0.166667	Safb2	1.37448	0.017684	1	0.417476	0.344
																		Ifitm3	1.64213	0.0469265	1	0.489362	0.342342	Lmbr1l	2.0392	0.00344842	1	0.173028	0.0897436	Gadd45b	0.698176	0.0177192	1	0.121359	0.205333
																		Osbpl9	1.6205	0.0470019	1	0.489362	0.36036	Lactb	1.66851	0.00346183	1	0.221374	0.123932	Hopx	1.49419	0.0177433	1	0.393204	0.338667
																		Atp2b4	2.78755	0.0470106	1	0.191489	0.0900901	Kdm6b	1.53332	0.00347406	1	0.226463	0.128205	Ece1	0.558517	0.0179017	1	0.0825243	0.152
																		Timm21	0.361491	0.0471337	1	0.0425532	0.162162	Pbrm1	1.56726	0.00348978	1	0.282443	0.175214	Coro1b	0.878585	0.0179408	1	0.723301	0.784
																		Rap1b	0.636837	0.0472293	1	0.361702	0.558559	Hnrnpa1	1.26377	0.0034936	1	0.564885	0.401709	Psmb3	0.83574	0.0180405	1	0.582524	0.696
																		Dnajc9	0.415207	0.0473507	1	0.0851064	0.225225	AY036118	1.19628	0.00349362	1	0.880407	0.794872	Zcchc24	1.86418	0.0180422	1	0.126214	0.0693333
																		Sptbn1	1.7295	0.0475188	1	0.404255	0.27027	Brd4	1.53377	0.00349541	1	0.290076	0.188034	Ube2f	0.791922	0.0180674	1	0.417476	0.536
																		Naga	0.636149	0.0476932	1	0.340426	0.486486	Nudt4	1.10271	0.00351589	1	0.92112	0.876068	Luc7l	0.620389	0.0181273	1	0.131068	0.213333
																		Plcb1	3.2772	0.0477701	1	0.148936	0.0540541	Atpaf1	1.51927	0.00353262	1	0.279898	0.175214	C3	1.35354	0.0181708	1	0.466019	0.402667
																		Eml1	2.88342	0.0477701	1	0.148936	0.0540541	Elf3	0.549314	0.00353708	1	0.147583	0.235043	Sgpp1	1.90096	0.0182499	1	0.169903	0.104
																		Cdc23	2.45011	0.0477701	1	0.148936	0.0540541	Itpr1	1.33418	0.00356547	1	0.452926	0.324786	Gnpat	0.65158	0.0182668	1	0.101942	0.181333
																		Hmgcs1	0.719962	0.0478548	1	0.404255	0.603604	Top1	1.39964	0.00356597	1	0.437659	0.307692	Gsr	1.13461	0.0183158	1	0.771845	0.725333
																		Eml4	0.400132	0.0479864	1	0.106383	0.243243	Cdh1	1.31208	0.00357045	1	0.463104	0.333333	Rnf213	0.750003	0.0183328	1	0.257282	0.362667
																		Baz2a	0.526537	0.0480409	1	0.191489	0.36036	R3hdm2	1.56546	0.00357121	1	0.300254	0.192308	Ube2q2	0.491183	0.0184037	1	0.0485437	0.106667
																		1810034E14Rik	0.346545	0.0481745	1	0.0638298	0.198198	Tia1	1.54218	0.0035719	1	0.295165	0.188034	Sptssa	0.788898	0.0184891	1	0.359223	0.493333
																		Mettl9	1.6452	0.0482431	1	0.446809	0.315315	Cc2d1a	1.75756	0.00359183	1	0.19084	0.102564	Nudt21	0.760481	0.0185116	1	0.339806	0.456
																		Gimap6	1.6196	0.0482954	1	0.553191	0.414414	Csnk1d	1.56897	0.00360389	1	0.300254	0.196581	Gpx4	1.12103	0.018543	1	0.762136	0.733333
																		Arid5a	0.574599	0.0484447	1	0.212766	0.378378	Arg2	1.50581	0.00360556	1	0.175573	0.0854701	Slc4a2	0.480841	0.018567	1	0.0631068	0.125333
																		Runx2	0.750756	0.0486796	1	0.468085	0.711712	Smek2	1.55283	0.0036211	1	0.287532	0.183761	Jup	0.615397	0.0186004	1	0.0776699	0.146667
																		Pdgfa	2.40686	0.0487067	1	0.297872	0.18018	Gpr162	2.29489	0.00363071	1	0.117048	0.0470085	Scp2	1.1712	0.0186517	1	0.747573	0.693333
																		Trmt112	0.775472	0.0487776	1	0.680851	0.828829	Map3k3	1.69013	0.00363448	1	0.203562	0.111111	Rgs2	0.828691	0.0186709	1	0.572816	0.693333
																		Dcaf11	0.550878	0.0489653	1	0.212766	0.378378	Lsm3	1.45093	0.00365121	1	0.318066	0.200855	Slfn2	0.821309	0.0187127	1	0.553398	0.661333
																		Psmd8	1.40351	0.0489668	1	0.744681	0.603604	Cnot10	1.92732	0.00368771	1	0.198473	0.111111	Samsn1	1.30404	0.018803	1	0.553398	0.541333
																		Hk1	2.46269	0.0489946	1	0.255319	0.144144	Rapgef1	1.96398	0.00369259	1	0.150127	0.0726496	Bcl7c	0.638257	0.018884	1	0.0485437	0.109333
																		Ap3m2	0.144374	0.0491099	1	0.0212766	0.117117	Fpgs	1.43687	0.00370572	1	0.318066	0.200855	D230025D16Rik	0.511242	0.0190388	1	0.0582524	0.12
																		Pepd	0.67896	0.0491203	1	0.297872	0.504505	Pno1	1.48254	0.0037095	1	0.343511	0.239316	Eif2ak1	0.724708	0.0190914	1	0.184466	0.282667
																		Fam214a	0.387896	0.0492232	1	0.106383	0.243243	Crebrf	1.54583	0.00371246	1	0.274809	0.17094	Id3	0.678713	0.0191242	1	0.15534	0.245333
																		Ccr5	0.379735	0.0492232	1	0.106383	0.243243	Mtmr2	1.92453	0.00371264	1	0.198473	0.111111	D10Wsu102e	0.616779	0.0191534	1	0.0436893	0.101333
																		Trip6	1.95419	0.0494158	1	0.191489	0.0810811	Myo18a	1.37246	0.00371502	1	0.455471	0.324786	Wdr18	0.654019	0.0193191	1	0.131068	0.213333
																		Snrnp25	0.555131	0.0497584	1	0.148936	0.315315	Usp10	1.44267	0.00371579	1	0.312977	0.200855	Hspa4	0.796673	0.0193339	1	0.417476	0.544
																								Kif21a	1.44632	0.00374274	1	0.368957	0.25641	Aen	0.752055	0.0194267	1	0.0679612	0.138667
																								Scyl2	1.5722	0.00374693	1	0.216285	0.119658	Syne3	0.529305	0.01943	1	0.0728155	0.138667
																								Tpd52l1	1.35416	0.00374825	1	0.391858	0.264957	Nfkbil1	0.556164	0.0194337	1	0.092233	0.168
																								Tspyl1	1.46208	0.00376953	1	0.348601	0.235043	Mtpap	0.520468	0.0194341	1	0.0776699	0.146667
																								Rufy3	1.7752	0.00379745	1	0.216285	0.123932	Tbca	0.78535	0.0194559	1	0.432039	0.570667
																								Faf2	1.60329	0.00380274	1	0.256997	0.15812	Gpr35	0.771867	0.0194649	1	0.286408	0.408
																								Ppil6	1.52621	0.00380615	1	0.287532	0.183761	Lgals8	0.774827	0.0194708	1	0.121359	0.213333
																								Nup153	1.88435	0.00381293	1	0.13486	0.0598291	Zmat2	0.743959	0.0194917	1	0.286408	0.397333
																								Ddx23	1.97171	0.00381519	1	0.160305	0.0811966	Asna1	0.721432	0.0195392	1	0.23301	0.338667
																								Pah	0.606417	0.00381795	1	0.208651	0.294872	Pfdn6	0.719077	0.019553	1	0.179612	0.277333
																								Dhrs11	1.38582	0.00381925	1	0.358779	0.235043	L1cam	1.52451	0.0195549	1	0.26699	0.186667
																								Safb2	1.39667	0.00383056	1	0.340967	0.226496	Rnf13	0.733084	0.0196837	1	0.325243	0.432
																								Prepl	1.6795	0.00383772	1	0.193384	0.102564	Uba6	0.794146	0.0198354	1	0.0679612	0.136
																								Anks1	1.43839	0.00384925	1	0.384224	0.269231	Borcs8	0.774622	0.0198593	1	0.286408	0.405333
																								Ankra2	1.69208	0.00385041	1	0.188295	0.0982906	Atp6v0a1	0.597997	0.0198731	1	0.101942	0.178667
																								Birc3	2.19795	0.00385586	1	0.122137	0.0512821	Gsn	0.786109	0.0198925	1	0.368932	0.496
																								Eif3c	1.28159	0.00385921	1	0.585242	0.42735	Tlr1	0.436806	0.0199469	1	0.0533981	0.112
																								Ddx41	1.77811	0.00386243	1	0.246819	0.153846	Cggbp1	0.731096	0.0199803	1	0.281553	0.397333
																								Colgalt1	2.01798	0.00386488	1	0.175573	0.0940171	Fcer1g	0.967342	0.0199945	1	0.898058	0.904
																								mt-Co3	0.959938	0.00387218	1	1	1	Kif21b	1.67118	0.0200443	1	0.281553	0.210667
																								Zfp281	1.93697	0.00390679	1	0.157761	0.0769231	Lpxn	0.639589	0.0200811	1	0.106796	0.186667
																								Denr	1.41243	0.00390757	1	0.391858	0.277778	Cuta	0.813358	0.0200981	1	0.364078	0.501333
																								Eps8	1.77003	0.00391697	1	0.21374	0.123932	Gm4070	0.748089	0.0201066	1	0.0873786	0.162667
																								Fip1l1	1.54592	0.00393896	1	0.29771	0.196581	Appl1	0.559614	0.0201631	1	0.0776699	0.144
																								Rfwd3	1.95103	0.0039446	1	0.185751	0.102564	Eps15l1	0.732302	0.0201873	1	0.150485	0.24
																								Dpf2	1.31904	0.00395331	1	0.340967	0.213675	Kdelr1	0.798224	0.0202553	1	0.393204	0.517333
																								Bccip	1.39238	0.00397068	1	0.414758	0.286325	Mfsd10	0.669028	0.0202572	1	0.160194	0.248
																								Slc27a2	1.27289	0.00398678	1	0.318066	0.192308	Irf8	0.81884	0.0204227	1	0.470874	0.584
																								Aldh6a1	1.24266	0.00400102	1	0.653944	0.508547	Tmem230	0.779719	0.0204331	1	0.126214	0.216
																								Cluap1	1.82853	0.0040055	1	0.157761	0.0769231	Dusp11	0.789194	0.020454	1	0.354369	0.493333
																								Zkscan1	1.47522	0.00402153	1	0.361323	0.247863	Snrpf	0.793878	0.0204997	1	0.436893	0.546667
																								Ttc39b	1.99417	0.00402342	1	0.167939	0.0854701	Commd9	0.598403	0.0205616	1	0.0631068	0.128
																								Tmem37	1.40908	0.0040402	1	0.295165	0.179487	Rgs1	1.54133	0.0205664	1	0.203883	0.130667
																								Pdhx	1.56955	0.00404942	1	0.279898	0.175214	Gmppa	0.788574	0.0206089	1	0.150485	0.242667
																								Dnajc8	1.37176	0.00404996	1	0.328244	0.213675	Ndufaf4	0.769363	0.0206096	1	0.0728155	0.141333
																								Psme3	1.63621	0.00405724	1	0.234097	0.136752	Urm1	0.627678	0.0206292	1	0.126214	0.205333
																								Dnajc21	1.6203	0.00406135	1	0.201018	0.111111	Sh3kbp1	1.27323	0.0206914	1	0.490291	0.426667
																								Cab39l	1.5763	0.00406303	1	0.284987	0.183761	Tor4a	0.620817	0.020762	1	0.0728155	0.141333
																								Slc19a2	1.87289	0.00406439	1	0.147583	0.0683761	Lmf1	0.660056	0.0208354	1	0.0970874	0.173333
																								B230219D22Rik	1.38136	0.00407013	1	0.417303	0.294872	Letm1	0.742356	0.0208721	1	0.165049	0.256
																								Nsmf	1.44962	0.00408842	1	0.24173	0.132479	Rab24	0.778714	0.0208844	1	0.237864	0.341333
																								Mib1	1.6545	0.00409	1	0.13486	0.0598291	Hdlbp	0.817063	0.0209511	1	0.31068	0.445333
																								Dynlt3	1.29307	0.00409073	1	0.529262	0.401709	Sft2d1	0.788363	0.0210485	1	0.432039	0.570667
																								Enthd2	2.8052	0.00410833	1	0.101781	0.0384615	Lyst	1.60918	0.021086	1	0.23301	0.162667
																								2810428I15Rik	1.25765	0.00411207	1	0.697201	0.521368	Rnf6	0.744236	0.0211279	1	0.203883	0.306667
																								Psmg1	0.561249	0.00411456	1	0.188295	0.273504	Mettl1	0.408902	0.0211523	1	0.0485437	0.104
																								Lzts2	1.48117	0.00412394	1	0.318066	0.209402	Pyhin1	0.710623	0.0211871	1	0.218447	0.314667
																								Zfp560	1.49264	0.0041295	1	0.26972	0.166667	Rela	0.791483	0.0212042	1	0.354369	0.474667
																								Txnrd1	1.36972	0.00413771	1	0.37659	0.260684	Wdr36	0.560452	0.0212477	1	0.0533981	0.112
																								Tgfbrap1	1.92885	0.0041389	1	0.160305	0.0811966	Mrpl21	0.73113	0.0212493	1	0.213592	0.309333
																								Sptbn1	1.23378	0.00418038	1	0.684478	0.551282	Eef2	0.921049	0.0213004	1	0.839806	0.885333
																								Zfp704	1.69024	0.0041886	1	0.211196	0.119658	1500011K16Rik	0.617282	0.0213895	1	0.11165	0.186667
																								Cd164l2	1.39718	0.00419299	1	0.343511	0.226496	Scyl1	0.717385	0.0213934	1	0.194175	0.298667
																								Erdr1	1.63202	0.00420909	1	0.216285	0.128205	Tonsl	0.798088	0.0214495	1	0.441748	0.557333
																								Ddx26b	1.56531	0.00421901	1	0.216285	0.119658	Cr1l	0.787118	0.0215099	1	0.194175	0.301333
																								Rest	1.72578	0.00422498	1	0.211196	0.119658	Cyb561a3	0.521093	0.0215781	1	0.0776699	0.144
																								Fech	1.36806	0.00422665	1	0.363868	0.239316	Acat1	0.716338	0.0216061	1	0.257282	0.365333
																								Msantd4	1.73417	0.00424975	1	0.16285	0.0811966	Ssna1	0.788796	0.0216154	1	0.325243	0.456
																								Akap8l	1.46508	0.00425275	1	0.290076	0.175214	Cd244	0.817873	0.0216476	1	0.417476	0.562667
																								Tmx1	1.69575	0.00426298	1	0.251908	0.153846	Ormdl2	0.666462	0.0216755	1	0.184466	0.274667
																								Rabgef1	2.10458	0.00427521	1	0.155216	0.0769231	Tmem214	0.677484	0.0217392	1	0.092233	0.165333
																								Ppdpf	1.19633	0.00428002	1	0.659033	0.517094	Ntpcr	0.691097	0.0217432	1	0.126214	0.208
																								Pink1	1.25082	0.00428261	1	0.577608	0.42735	Apobec3	0.61352	0.0217505	1	0.0970874	0.170667
																								Tubb2a	1.29927	0.00430871	1	0.56743	0.423077	Sf3b3	0.838923	0.021757	1	0.208738	0.314667
																								Lsm14a	1.61851	0.00431403	1	0.246819	0.145299	Ssrp1	0.741591	0.021788	1	0.223301	0.32
																								Ppat	1.35696	0.00431914	1	0.407125	0.286325	Cox8a	0.924995	0.0218693	1	0.81068	0.842667
																								Myef2	1.76118	0.00432067	1	0.198473	0.111111	Rgs10	0.784943	0.0218903	1	0.364078	0.461333
																								Ap3s1	2.88118	0.00432177	1	0.122137	0.0555556	Tpt1	1.01892	0.0218984	1	0.902913	0.912
																								Thyn1	1.4905	0.00432386	1	0.292621	0.188034	Fbxo34	0.608701	0.0219033	1	0.0679612	0.130667
																								C1d	1.40284	0.00433765	1	0.386768	0.264957	Smg9	0.631714	0.0219111	1	0.116505	0.194667
																								Chrac1	1.39916	0.00434085	1	0.437659	0.320513	Cst3	0.916678	0.0219273	1	0.864078	0.890667
																								Carhsp1	2.94221	0.00434334	1	0.111959	0.0470085	Pik3r5	1.4282	0.0219902	1	0.368932	0.293333
																								Usp24	1.4005	0.00434819	1	0.333333	0.222222	Rpl28	0.964163	0.0219988	1	0.898058	0.898667
																								Tpr	1.28209	0.00435483	1	0.48855	0.350427	Ap3d1	0.721235	0.0220029	1	0.218447	0.317333
																								Kpna4	1.81061	0.00438248	1	0.170483	0.0854701	Wfdc17	0.794473	0.0220095	1	0.291262	0.394667
																								Nrd1	1.33741	0.00438991	1	0.427481	0.307692	Cdc16	0.559577	0.022014	1	0.0679612	0.130667
																								Morf4l1	1.19106	0.00439614	1	0.80916	0.679487	Rsph3a	0.580635	0.0222475	1	0.0825243	0.149333
																								Eif3a	1.31783	0.00439933	1	0.475827	0.350427	Prkrip1	0.617636	0.0222778	1	0.0679612	0.133333
																								Gm53	1.49721	0.00441461	1	0.358779	0.24359	Tial1	0.830421	0.0222793	1	0.23301	0.352
																								Camk2n1	1.27847	0.00441905	1	0.534351	0.405983	Tmem208	0.782702	0.0225374	1	0.276699	0.397333
																								Kpna2	2.32133	0.00443785	1	0.101781	0.0384615	Trip11	0.67857	0.0225538	1	0.126214	0.208
																								Tle3	2.24859	0.00447019	1	0.147583	0.0726496	Tmed9	0.819554	0.0225793	1	0.461165	0.589333
																								Cks2	1.40448	0.00448039	1	0.26972	0.15812	Nagpa	0.699396	0.0225927	1	0.208738	0.304
																								Ghr	1.2889	0.0044861	1	0.442748	0.307692	Ngrn	0.723819	0.022669	1	0.0728155	0.141333
																								Tma7	1.20089	0.00448801	1	0.819338	0.666667	Sort1	1.86018	0.0226782	1	0.203883	0.141333
																								Cab39	1.44875	0.00450815	1	0.300254	0.188034	Ppan	0.716926	0.022727	1	0.0679612	0.133333
																								Commd7	1.56473	0.00451144	1	0.24173	0.141026	Sgms1	1.39361	0.0227482	1	0.349515	0.266667
																								Baiap2l2	1.20779	0.00452267	1	0.798982	0.666667	Zfp646	1.82539	0.022756	1	0.131068	0.0746667
																								Picalm	1.43156	0.00452609	1	0.333333	0.222222	Serpinb10	1.50683	0.02276	1	0.276699	0.202667
																								Ctcf	1.50589	0.00453317	1	0.254453	0.15812	Mpc1	0.750765	0.0227636	1	0.320388	0.448
																								Larp1	1.52044	0.00454904	1	0.305344	0.200855	Tmem259	1.42921	0.0230279	1	0.325243	0.253333
																								Ppp2ca	1.31291	0.004588	1	0.424936	0.311966	Cmc1	0.717465	0.0230517	1	0.247573	0.352
																								Slx1b	1.61434	0.00459484	1	0.208651	0.115385	Hk2	0.629768	0.0231114	1	0.0970874	0.168
																								Pank3	1.86272	0.00460698	1	0.185751	0.102564	Ndufb4	0.828308	0.023164	1	0.529126	0.624
																								Taf10	1.61203	0.0046109	1	0.272265	0.175214	Prkar2a	0.497818	0.0231659	1	0.0582524	0.117333
																								Cdc14b	2.05694	0.00465398	1	0.16285	0.0854701	Nono	0.764184	0.02326	1	0.349515	0.450667
																								Slc25a23	1.43336	0.00465628	1	0.37659	0.269231	Pygl	1.32696	0.0233065	1	0.42233	0.352
																								Gnb2l1	0.869374	0.00467642	1	0.725191	0.735043	Ndufc1	0.832101	0.0233334	1	0.398058	0.530667
																								Irs2	1.78638	0.00467896	1	0.193384	0.106838	Dynlt1b	0.822969	0.0234244	1	0.495146	0.589333
																								Ier3ip1	1.27748	0.00472221	1	0.547074	0.418803	Krtcap2	0.817042	0.0234474	1	0.490291	0.602667
																								Napg	1.70606	0.0047265	1	0.239186	0.145299	Zfp36	1.06024	0.0234839	1	0.92233	0.92
																								Herpud2	1.78244	0.00474181	1	0.193384	0.106838	Themis2	0.794215	0.0236086	1	0.402913	0.512
																								Cdh16	0.898947	0.00475016	1	0.819338	0.803419	mt-Nd4	1.07658	0.0236289	1	0.92233	0.946667
																								Faap20	1.48276	0.00475288	1	0.282443	0.175214	Msr1	0.732003	0.0236688	1	0.165049	0.261333
																								Id3	0.448299	0.00477412	1	0.0636132	0.128205	Gmppb	0.531986	0.0236991	1	0.0631068	0.122667
																								Epc2	2.40711	0.00477799	1	0.10687	0.042735	Arfgap1	0.635904	0.0237127	1	0.0970874	0.170667
																								Celsr1	2.05984	0.0047804	1	0.142494	0.0683761	Map1lc3b	0.827556	0.0237795	1	0.548544	0.656
																								Btg1	1.54029	0.00478585	1	0.371501	0.273504	Imp3	0.724043	0.0237913	1	0.257282	0.352
																								Phkg2	1.62382	0.00479004	1	0.221374	0.128205	Cbfb	0.721573	0.0238313	1	0.174757	0.274667
																								Zfp512	1.75821	0.00480931	1	0.157761	0.0769231	Bmp2k	0.512295	0.0239724	1	0.0582524	0.117333
																								Mllt11	2.34989	0.00481508	1	0.114504	0.0470085	Atp6v0c	0.890278	0.0240474	1	0.694175	0.752
																								Nccrp1	0.777342	0.00481839	1	0.575064	0.623932	Ly96	0.676508	0.0240696	1	0.0873786	0.16
																								Ccdc141	1.41499	0.00482453	1	0.386768	0.282051	Mir142hg	2.43446	0.0240887	1	0.121359	0.0693333
																								Akr1c12	2.42655	0.00483509	1	0.10687	0.042735	Hexa	0.809734	0.0241685	1	0.441748	0.549333
																								Commd4	1.36123	0.00484329	1	0.417303	0.303419	A430078G23Rik	1.80594	0.0241752	1	0.140777	0.0826667
																								Zbed4	2.09364	0.00486143	1	0.109415	0.042735	Ptpn18	0.879211	0.0242758	1	0.68932	0.768
																								Eprs	1.41159	0.00488375	1	0.363868	0.247863	Llph	0.815379	0.0242836	1	0.38835	0.522667
																								Slc20a1	2.07969	0.00488464	1	0.114504	0.0470085	Ift22	0.594026	0.0243981	1	0.0533981	0.112
																								Taf4a	1.89096	0.00491466	1	0.139949	0.0641026	Atp13a1	0.75078	0.0244116	1	0.135922	0.221333
																								Sh3bp1	2.03213	0.00492624	1	0.119593	0.0512821	Pycard	0.802717	0.0244371	1	0.441748	0.544
																								Lrrc24	1.51077	0.00493335	1	0.254453	0.153846	Ank	0.655832	0.0244547	1	0.0825243	0.152
																								Nutf2	1.36804	0.00494387	1	0.468193	0.34188	Vps4a	0.701791	0.0245471	1	0.145631	0.232
																								Tet2	1.67392	0.00495101	1	0.208651	0.119658	Dcaf15	0.51798	0.0245481	1	0.0485437	0.104
																								Sbds	1.37602	0.0049815	1	0.384224	0.25641	Fopnl	0.662787	0.0245682	1	0.0825243	0.152
																								Tbc1d14	1.48893	0.00498204	1	0.254453	0.153846	Ube4a	0.696126	0.0245921	1	0.0728155	0.138667
																								Ift122	1.54656	0.00499322	1	0.26972	0.17094	Klhdc4	0.525397	0.0246059	1	0.0825243	0.149333
																								Slc45a4	1.53565	0.00499322	1	0.26972	0.17094	Ahcy	0.633498	0.0246227	1	0.135922	0.216
																								Kidins220	1.26108	0.00501485	1	0.575064	0.431624	Prr14	0.761497	0.0248082	1	0.237864	0.336
																								Trim26	1.73478	0.00502036	1	0.226463	0.136752	Gpr65	0.668672	0.02485	1	0.169903	0.253333
																								Grina	0.818013	0.00502429	1	0.597964	0.619658	Ywhah	0.818609	0.0248523	1	0.485437	0.618667
																								Crip1	2.95637	0.00503307	1	0.122137	0.0555556	Dap	0.798287	0.024937	1	0.34466	0.472
																								Pdcd6	1.24906	0.00504543	1	0.577608	0.431624	Marcksl1	0.762749	0.0249514	1	0.165049	0.258667
																								Pabpc4	1.76623	0.00507342	1	0.21374	0.128205	BC005624	0.794381	0.0250869	1	0.286408	0.408
																								Sri	1.21645	0.00507807	1	0.735369	0.598291	Eif4ebp1	0.826222	0.0252046	1	0.432039	0.568
																								Ethe1	1.3081	0.00508071	1	0.496183	0.367521	Stip1	0.818801	0.0252872	1	0.15534	0.250667
																								Trip12	1.52436	0.00509249	1	0.318066	0.213675	Ggta1	0.816148	0.0252952	1	0.199029	0.304
																								Papss2	0.530501	0.00509654	1	0.13486	0.213675	Spast	0.620915	0.0254395	1	0.0776699	0.144
																								Rbm7	1.43414	0.00510404	1	0.35369	0.247863	Nupr1	1.19973	0.0254923	1	0.679612	0.624
																								Lig3	2.44411	0.00511483	1	0.10687	0.042735	Nme3	0.61664	0.0255521	1	0.11165	0.181333
																								Hspb8	2.26488	0.00512289	1	0.101781	0.0384615	Srp54b	0.731647	0.0255574	1	0.169903	0.264
																								Glg1	1.30047	0.00512313	1	0.450382	0.316239	Fam129b	0.710072	0.0255582	1	0.174757	0.258667
																								Dach1	2.2278	0.00512457	1	0.13486	0.0641026	Trap1	0.80631	0.0256265	1	0.101942	0.178667
																								Rpl9	1.1718	0.00514193	1	0.788804	0.67094	Zwint	0.679244	0.0256693	1	0.0825243	0.152
																								Zcchc3	1.93051	0.00515303	1	0.198473	0.115385	Cox6a1	0.880652	0.0256856	1	0.684466	0.733333
																								Wbp11	1.32532	0.00516275	1	0.363868	0.239316	Uchl3	0.60621	0.0256953	1	0.092233	0.162667
																								Spcs3	1.37082	0.00516667	1	0.496183	0.384615	Srp72	0.804285	0.0257011	1	0.26699	0.384
																								Med14	2.63834	0.00518142	1	0.117048	0.0512821	Slc50a1	0.795276	0.0258497	1	0.247573	0.36
																								Rnf187	1.22735	0.00522103	1	0.64631	0.487179	Adar	0.731982	0.0260428	1	0.160194	0.250667
																								Acyp2	1.36271	0.00524883	1	0.368957	0.252137	Ppp3ca	1.46249	0.0260446	1	0.383495	0.333333
																								Rnf220	2.26091	0.0053105	1	0.124682	0.0555556	Rrp1	0.800199	0.02605	1	0.364078	0.472
																								Clic1	1.22699	0.00533099	1	0.70229	0.547009	Hps1	0.704769	0.0261781	1	0.106796	0.184
																								Zc3h7a	1.71394	0.00533591	1	0.178117	0.0940171	Tlr9	0.542277	0.0263075	1	0.0485437	0.104
																								Scn4b	1.29445	0.00536949	1	0.529262	0.397436	Gatm	1.83625	0.026343	1	0.242718	0.181333
																								Tpp2	1.63768	0.00537219	1	0.195929	0.106838	Polr2j	0.785046	0.0263651	1	0.305825	0.424
																								Spint1	1.27447	0.00538449	1	0.51145	0.380342	Pnpt1	0.65102	0.0263688	1	0.0728155	0.138667
																								Mrps28	1.30351	0.00542662	1	0.519084	0.384615	Lrrc41	0.633775	0.0263749	1	0.0970874	0.168
																								Abcc10	2.13603	0.00544177	1	0.124682	0.0555556	Casp1	0.862512	0.0264104	1	0.257282	0.381333
																								Araf	1.35457	0.00544285	1	0.335878	0.226496	Mrps18c	0.777584	0.0264937	1	0.276699	0.386667
																								Bsdc1	1.55452	0.00546133	1	0.226463	0.132479	Cct5	0.813685	0.0265	1	0.441748	0.562667
																								Ltn1	1.78829	0.00546593	1	0.145038	0.0683761	Nsdhl	0.505419	0.0266508	1	0.0533981	0.109333
																								Rfc1	1.49386	0.00547213	1	0.307888	0.205128	Tnfrsf1a	0.875136	0.0266757	1	0.708738	0.776
																								Grcc10	0.911298	0.00547713	1	0.826972	0.799145	Arl6ip5	0.845068	0.0267021	1	0.567961	0.666667
																								Sox12	2.17006	0.0055192	1	0.137405	0.0683761	Pdk3	0.639615	0.0267231	1	0.101942	0.176
																								Pak2	1.34401	0.00551921	1	0.356234	0.235043	Kpna1	0.495172	0.0267683	1	0.0679612	0.128
																								Usp5	1.42725	0.00553634	1	0.310433	0.200855	Rabep1	0.789164	0.0268129	1	0.11165	0.192
																								Prpf19	1.38279	0.00554007	1	0.368957	0.252137	Pdzk1ip1	1.65923	0.0268607	1	0.179612	0.114667
																								Prrc2b	1.46404	0.00554568	1	0.320611	0.222222	Atp5g2	0.898135	0.0270659	1	0.703883	0.749333
																								Mtfr1	1.41881	0.00555426	1	0.287532	0.179487	Socs4	0.654309	0.0271821	1	0.106796	0.178667
																								Malsu1	1.38542	0.00556163	1	0.389313	0.273504	Nutf2	0.756361	0.0272137	1	0.247573	0.354667
																								Sdc1	2.13442	0.00559992	1	0.111959	0.0470085	Med6	0.590455	0.0272384	1	0.0873786	0.157333
																								Bcl2l12	1.93277	0.0056122	1	0.152672	0.0769231	Crbn	0.653921	0.0273727	1	0.0533981	0.109333
																								Ptges2	1.49153	0.0056281	1	0.26972	0.17094	Avl9	0.522841	0.0273985	1	0.0631068	0.122667
																								Gm10076	1.06004	0.00563413	1	0.97201	0.948718	Ccdc109b	0.780865	0.0274013	1	0.349515	0.453333
																								Pex6	1.82148	0.00564104	1	0.188295	0.106838	Ndufa13	0.875239	0.0275298	1	0.65534	0.744
																								Ubr7	1.95674	0.00566661	1	0.157761	0.0811966	Cmpk2	0.478383	0.027773	1	0.0485437	0.101333
																								Rnf38	1.87383	0.00566918	1	0.127226	0.0555556	Nop9	0.659069	0.027919	1	0.145631	0.226667
																								Uap1	1.44522	0.00567149	1	0.302799	0.200855	Rbm8a	0.774008	0.0279394	1	0.334951	0.437333
																								Gstm5	1.36244	0.00571864	1	0.361323	0.247863	Bag3	0.787147	0.0279453	1	0.174757	0.272
																								Rnf41	1.49988	0.00572117	1	0.239186	0.141026	Stard3nl	0.785051	0.0280151	1	0.300971	0.410667
																								Pdcd6ip	1.34128	0.00572789	1	0.386768	0.264957	Armc7	0.653516	0.0280717	1	0.0776699	0.144
																								Lemd2	1.93668	0.00574161	1	0.142494	0.0683761	Tmbim1	0.690509	0.0282115	1	0.165049	0.250667
																								Echs1	0.878817	0.00574464	1	0.753181	0.74359	Lman2l	0.7605	0.0284059	1	0.131068	0.216
																								Rnf6	1.40216	0.00576042	1	0.351145	0.239316	Zfp652	2.49342	0.028443	1	0.131068	0.08
																								Fam76a	1.49336	0.00577765	1	0.254453	0.153846	Cib2	0.505133	0.0284854	1	0.0582524	0.114667
																								Grb2	1.61678	0.00579334	1	0.206107	0.119658	Txnl4a	0.804266	0.0284865	1	0.11165	0.189333
																								Surf4	1.31703	0.00579585	1	0.450382	0.320513	Tap2	0.762479	0.0284904	1	0.286408	0.389333
																								Trps1	2.12879	0.00580838	1	0.145038	0.0726496	Fam214b	0.590501	0.0285013	1	0.0970874	0.165333
																								Dnmt3a	1.65922	0.00581111	1	0.21374	0.123932	Aggf1	0.763581	0.0285823	1	0.165049	0.256
																								Taz	1.37738	0.00582456	1	0.351145	0.239316	Fut11	0.541393	0.0285942	1	0.0631068	0.122667
																								Tmem164	1.66451	0.00583984	1	0.198473	0.111111	Ctsh	0.886895	0.0286456	1	0.679612	0.709333
																								Fbxo25	2.02689	0.0058775	1	0.111959	0.0470085	mt-Atp6	1.05085	0.0286745	1	0.980583	0.989333
																								Myh9	1.23157	0.00589945	1	0.643766	0.504274	Mon2	0.484175	0.0287072	1	0.0582524	0.114667
																								Arpc5	1.30116	0.00590729	1	0.534351	0.41453	Aimp1	0.754398	0.0287545	1	0.286408	0.389333
																								Gnb1	1.36555	0.00593658	1	0.320611	0.209402	Slc35b1	0.745554	0.0288131	1	0.213592	0.309333
																								Dcp2	2.06852	0.00594576	1	0.170483	0.0940171	Tmf1	0.507533	0.0288559	1	0.0582524	0.114667
																								Tnfaip2	0.549883	0.0059546	1	0.152672	0.235043	Krt80	1.48913	0.0288729	1	0.305825	0.24
																								Nadk2	1.44526	0.00596278	1	0.287532	0.179487	Snw1	0.781249	0.0288989	1	0.271845	0.384
																								Cltc	1.29059	0.00596758	1	0.526718	0.393162	Nudt19	0.652777	0.0289223	1	0.160194	0.245333
																								Vcpkmt	1.87152	0.00597393	1	0.16285	0.0854701	Ube2v1	0.815185	0.0289302	1	0.38835	0.506667
																								Gcn1l1	1.69857	0.00597668	1	0.221374	0.132479	Psmb10	0.817739	0.0289487	1	0.466019	0.570667
																								Casp8	2.00016	0.00598423	1	0.145038	0.0726496	Pdcd10	0.788197	0.0289878	1	0.373786	0.482667
																								Akr1c13	2.48973	0.00599053	1	0.132316	0.0641026	Tmem248	0.664491	0.0290816	1	0.131068	0.208
																								Cntrl	2.20266	0.00599283	1	0.122137	0.0555556	Slc25a3	0.911188	0.029092	1	0.796117	0.832
																								Fkbp2	0.844975	0.00600331	1	0.671756	0.700855	Dnajc30	0.766453	0.0291126	1	0.126214	0.208
																								Smad4	1.6973	0.00600434	1	0.198473	0.115385	Rala	0.818959	0.0291552	1	0.354369	0.493333
																								Dcbld2	2.08441	0.00600852	1	0.129771	0.0598291	Tmem135	0.673103	0.0292349	1	0.116505	0.192
																								Gltscr2	1.37539	0.00600924	1	0.396947	0.273504	Zfp277	0.676493	0.0293038	1	0.0825243	0.146667
																								Ankrd39	1.52994	0.00601618	1	0.272265	0.17094	Sun1	1.43205	0.0294055	1	0.160194	0.0986667
																								Drap1	1.40435	0.00605034	1	0.340967	0.235043	Cyp2ab1	0.566376	0.0294115	1	0.0728155	0.133333
																								Glis2	1.34324	0.00606015	1	0.475827	0.358974	Ptpn22	0.657421	0.0294684	1	0.140777	0.218667
																								Tbck	1.67297	0.00607316	1	0.178117	0.0940171	Hfe	0.814502	0.029476	1	0.330097	0.453333
																								Thap7	1.5091	0.00607929	1	0.277354	0.17094	Ppp1r2	1.29702	0.0294913	1	0.490291	0.450667
																								Kdm5a	1.54211	0.00608678	1	0.251908	0.15812	Clec2d	0.806281	0.0295171	1	0.339806	0.453333
																								Osbpl2	1.53163	0.00610329	1	0.282443	0.183761	Chchd1	0.800812	0.0296475	1	0.291262	0.405333
																								2610035D17Rik	1.79049	0.00611286	1	0.150127	0.0726496	Cuedc2	0.780338	0.0296507	1	0.325243	0.432
																								Fam229b	1.77897	0.00611895	1	0.160305	0.0811966	Zdhhc4	1.70325	0.0296508	1	0.237864	0.173333
																								Snhg6	1.623	0.00612457	1	0.221374	0.132479	Tax1bp3	0.711068	0.029687	1	0.131068	0.213333
																								Wbscr27	1.76395	0.00614799	1	0.160305	0.0811966	Ndufa8	0.823302	0.0296881	1	0.393204	0.498667
																								Gspt1	1.58077	0.00614936	1	0.256997	0.162393	Fgd2	0.833684	0.0296967	1	0.184466	0.28
																								Bcap29	1.93182	0.00617546	1	0.157761	0.0811966	Cic	1.5206	0.0297216	1	0.34466	0.285333
																								Brd3	1.50412	0.00617741	1	0.254453	0.15812	Tmem37	0.599151	0.0297483	1	0.0485437	0.101333
																								Sys1	1.36068	0.0061954	1	0.379135	0.264957	Btk	0.67851	0.0298581	1	0.203883	0.293333
																								Clptm1	1.35913	0.00619804	1	0.394402	0.277778	Dynlt3	0.733127	0.0298698	1	0.135922	0.218667
																								Idh2	0.956173	0.00623066	1	0.941476	0.893162	Panx1	0.682484	0.0299034	1	0.0970874	0.170667
																								Nmd3	1.46337	0.0062355	1	0.267176	0.166667	Serinc3	1.09993	0.0300136	1	0.752427	0.76
																								Msi2	1.29047	0.00624114	1	0.483461	0.367521	Rab6a	0.812753	0.0301506	1	0.262136	0.386667
																								Shroom3	1.3115	0.00627033	1	0.384224	0.269231	Cul2	0.494165	0.0301576	1	0.0485437	0.101333
																								D730001G18Rik	1.51729	0.00630729	1	0.211196	0.119658	Psmd6	0.757577	0.0301988	1	0.286408	0.389333
																								Rad17	1.76072	0.00630962	1	0.132316	0.0598291	Uchl5	0.662095	0.0302363	1	0.135922	0.210667
																								Zmym5	1.59499	0.00633584	1	0.264631	0.17094	Zc3hav1	0.793369	0.0303256	1	0.334951	0.456
																								Rad50	2.13827	0.00636181	1	0.111959	0.0470085	Snx3	0.841559	0.0304803	1	0.558252	0.645333
																								Usp6nl	2.4578	0.00636301	1	0.109415	0.0470085	Cacul1	0.680817	0.0304824	1	0.0970874	0.170667
																								Clu	1.4699	0.00636446	1	0.310433	0.205128	Stk24	1.30453	0.0304969	1	0.475728	0.418667
																								Bola3	1.18337	0.00638657	1	0.829517	0.696581	Tmem181a	0.764074	0.0305981	1	0.165049	0.253333
																								Zfp276	2.11635	0.0063933	1	0.122137	0.0555556	Itm2b	0.943519	0.0307518	1	0.854369	0.866667
																								Tbc1d20	1.69916	0.00639649	1	0.201018	0.115385	Rnf181	0.806633	0.0307832	1	0.247573	0.357333
																								Impa2	1.24537	0.006397	1	0.536896	0.384615	Psmc5	0.796597	0.0308594	1	0.296117	0.408
																								Gm7932	1.62369	0.00646468	1	0.21883	0.132479	Ppp1ca	0.89183	0.0308953	1	0.728155	0.786667
																								Rcc2	1.68975	0.00646488	1	0.147583	0.0726496	Ezh1	0.516587	0.0309064	1	0.0485437	0.101333
																								Rab3d	2.35245	0.00649066	1	0.109415	0.0470085	Gnpnat1	0.693468	0.0309475	1	0.0776699	0.141333
																								Cebpb	2.61693	0.00651009	1	0.119593	0.0555556	Bcl2l11	0.640592	0.0309766	1	0.101942	0.173333
																								Dag1	1.36929	0.00656475	1	0.366412	0.252137	Tcf4	0.712215	0.0310368	1	0.184466	0.269333
																								Far1	1.59817	0.00657671	1	0.236641	0.141026	Il13ra1	0.752443	0.0310655	1	0.296117	0.4
																								Ssr3	1.31734	0.00661046	1	0.412214	0.277778	Fli1	1.50184	0.0311101	1	0.339806	0.285333
																								Tfg	1.47275	0.00661964	1	0.333333	0.230769	Zc3h18	0.758583	0.0311189	1	0.150485	0.234667
																								Mrpl16	1.41989	0.00663933	1	0.310433	0.205128	Ampd3	2.11889	0.0311204	1	0.150485	0.096
																								Cox18	1.97573	0.00665135	1	0.139949	0.0683761	Srgn	0.9177	0.0311459	1	0.839806	0.872
																								Nsmce4a	1.47519	0.00665744	1	0.274809	0.179487	Wdr91	0.760859	0.0313158	1	0.0485437	0.104
																								Nprl2	1.41666	0.00666942	1	0.279898	0.175214	S100a1	0.746687	0.031318	1	0.184466	0.277333
																								Gstt2	1.39683	0.0066735	1	0.381679	0.269231	Abhd11	0.764936	0.0313211	1	0.174757	0.266667
																								Snrk	1.69206	0.00671286	1	0.193384	0.111111	Tbce	0.587683	0.0313795	1	0.092233	0.16
																								Ppp3ca	1.45781	0.00672293	1	0.307888	0.213675	Naga	1.34126	0.0314683	1	0.514563	0.466667
																								Rab3ip	1.18269	0.00674331	1	0.768448	0.662393	Phf3	1.687	0.0314719	1	0.247573	0.186667
																								Urm1	1.69656	0.0067535	1	0.236641	0.153846	Ddost	0.835439	0.0315639	1	0.441748	0.570667
																								Nqo2	1.62293	0.00677194	1	0.231552	0.141026	Stat6	0.791786	0.0316023	1	0.373786	0.490667
																								Dot1l	1.79254	0.00684074	1	0.183206	0.102564	Ntmt1	0.599779	0.0316026	1	0.0776699	0.138667
																								Lmo7	1.31022	0.00688071	1	0.470738	0.354701	Ebna1bp2	0.761289	0.0316179	1	0.199029	0.298667
																								Kif16b	1.6814	0.00688433	1	0.19084	0.106838	Txnrd2	0.69062	0.0316224	1	0.116505	0.192
																								Nfx1	1.50546	0.0068891	1	0.249364	0.153846	Traf1	0.822658	0.0316372	1	0.169903	0.261333
																								Appbp2	1.4953	0.00689326	1	0.234097	0.136752	Idh2	0.768253	0.0316656	1	0.257282	0.354667
																								Ccdc59	1.32005	0.00692619	1	0.315522	0.205128	Adrb2	1.3306	0.0316858	1	0.441748	0.365333
																								Baz2b	1.42928	0.00693762	1	0.356234	0.252137	Emc9	0.558875	0.0317286	1	0.0582524	0.114667
																								Ythdf1	2.41314	0.00693985	1	0.114504	0.0512821	Hnrnpk	0.896127	0.0317726	1	0.747573	0.797333
																								Dido1	1.8074	0.00694138	1	0.195929	0.115385	Slamf7	0.560155	0.0319507	1	0.0825243	0.144
																								Siva1	1.39057	0.00694384	1	0.389313	0.273504	Tmcc3	1.60774	0.0319692	1	0.18932	0.128
																								Cdc73	1.77053	0.0069723	1	0.201018	0.119658	Tufm	0.768282	0.0319746	1	0.184466	0.285333
																								Nob1	1.63311	0.0069735	1	0.201018	0.115385	Arpc5	0.917304	0.0322044	1	0.796117	0.824
																								Epn1	1.25622	0.00701359	1	0.557252	0.410256	Zbtb17	0.603848	0.0322096	1	0.092233	0.157333
																								Ppp3r1	1.61508	0.00702051	1	0.259542	0.166667	Slirp	0.760218	0.032246	1	0.218447	0.32
																								Fam192a	1.62682	0.00702151	1	0.229008	0.141026	Klhl2	1.96771	0.0323408	1	0.116505	0.0666667
																								Hagh	1.14123	0.00702559	1	0.875318	0.769231	Ccdc97	0.726722	0.032456	1	0.15534	0.24
																								Gpm6b	0.437062	0.0070342	1	0.0534351	0.111111	Ostc	0.792504	0.0325124	1	0.398058	0.482667
																								Cxadr	1.39292	0.00704515	1	0.368957	0.252137	Zfp809	0.503004	0.0325398	1	0.0485437	0.101333
																								Nktr	1.40514	0.00705604	1	0.361323	0.25641	Parp3	0.60512	0.0325709	1	0.0728155	0.133333
																								Kcmf1	1.34983	0.00711148	1	0.274809	0.17094	1110038F14Rik	0.715585	0.0327263	1	0.126214	0.205333
																								Rbl2	1.44085	0.00715962	1	0.254453	0.153846	Sod1	1.27928	0.0328456	1	0.276699	0.194667
																								Clptm1l	1.49401	0.00718921	1	0.310433	0.217949	Asb6	0.537001	0.0328544	1	0.0631068	0.12
																								Tmem106b	1.26541	0.00718981	1	0.552163	0.418803	Hnrnpa3	0.883417	0.032906	1	0.73301	0.808
																								Ctsl	0.695043	0.00720252	1	0.409669	0.461538	Mettl16	0.483577	0.0329358	1	0.0582524	0.112
																								Wdr5	1.55037	0.00720521	1	0.234097	0.141026	Galnt6	0.496524	0.0329807	1	0.0825243	0.141333
																								Phka2	1.98239	0.0072096	1	0.122137	0.0555556	Slc25a51	1.69636	0.0330435	1	0.218447	0.16
																								Sppl2b	1.55591	0.00723759	1	0.195929	0.111111	Gstp1	0.858747	0.033092	1	0.558252	0.688
																								Slc25a20	1.30515	0.0072482	1	0.3257	0.217949	Tmem159	0.601092	0.03316	1	0.0485437	0.101333
																								Ankrd54	1.35198	0.00725981	1	0.361323	0.247863	Eps8	0.619283	0.0331939	1	0.0825243	0.146667
																								Gcsh	1.29358	0.00726724	1	0.419847	0.299145	Slc25a22	0.692002	0.0331939	1	0.0825243	0.146667
																								Ccng2	1.90654	0.00729879	1	0.167939	0.0940171	3110043O21Rik	0.670984	0.0332685	1	0.0825243	0.146667
																								Mapk1ip1l	1.6985	0.00730319	1	0.185751	0.106838	Selk	0.906138	0.0333232	1	0.73301	0.765333
																								Habp4	1.27615	0.00731	1	0.366412	0.25641	Lilr4b	0.78442	0.033349	1	0.315534	0.437333
																								Atp6v1d	1.20878	0.00733169	1	0.692112	0.551282	Ap2a1	0.74663	0.0334085	1	0.15534	0.24
																								Slc34a2	1.74865	0.0073409	1	0.193384	0.111111	Sigmar1	0.79736	0.0334586	1	0.199029	0.298667
																								Tceb2	1.1128	0.00735347	1	0.936387	0.846154	Hacd2	0.74922	0.0335586	1	0.126214	0.205333
																								Fam207a	1.63839	0.00736981	1	0.157761	0.0811966	Mtor	0.671931	0.0335886	1	0.106796	0.176
																								Gtf3c3	2.19137	0.00738837	1	0.109415	0.0470085	Sec63	0.747534	0.0336071	1	0.101942	0.173333
																								Odc1	1.21936	0.00739819	1	0.37659	0.260684	Gm42641	0.600444	0.0336091	1	0.0485437	0.101333
																								Stox2	2.07717	0.00741549	1	0.104326	0.042735	Yrdc	0.727432	0.0336187	1	0.0825243	0.149333
																								Cdk10	2.0523	0.00741714	1	0.137405	0.0683761	Eif1b	0.804654	0.0336447	1	0.296117	0.410667
																								Itgb6	1.28535	0.00742458	1	0.501272	0.376068	Slc25a39	0.781101	0.0337508	1	0.412621	0.52
																								Slc30a6	2.40004	0.00745307	1	0.124682	0.0598291	Id1	2.27861	0.0337959	1	0.101942	0.056
																								Tmem131	2.06736	0.00747003	1	0.16285	0.0897436	Fam222b	0.626348	0.0338427	1	0.0631068	0.12
																								Clk1	1.25948	0.00747346	1	0.48855	0.350427	Brpf1	0.733142	0.033895	1	0.165049	0.250667
																								Synj2bp	1.43941	0.00748345	1	0.310433	0.209402	Twf2	0.827835	0.0339233	1	0.402913	0.509333
																								Cbx6	1.4881	0.00748775	1	0.305344	0.205128	Gm9844	0.690878	0.0339606	1	0.126214	0.202667
																								Cnot3	1.5526	0.0075495	1	0.195929	0.111111	Rasa4	0.823251	0.0340377	1	0.276699	0.381333
																								Sec11c	1.3135	0.00757301	1	0.46056	0.32906	Nlrp3	0.738191	0.0340637	1	0.23301	0.322667
																								Sgf29	1.65752	0.00758753	1	0.203562	0.119658	Sirpb1c	0.844593	0.0342129	1	0.553398	0.637333
																								Scaf4	2.2182	0.00760108	1	0.147583	0.0769231	Nsmce1	0.703765	0.0342156	1	0.106796	0.176
																								Ccdc84	1.65898	0.00761443	1	0.157761	0.0811966	Sbno1	0.800677	0.0342222	1	0.300971	0.408
																								Dynll2	1.30746	0.00761964	1	0.402036	0.282051	Fmo1	2.376	0.0342816	1	0.101942	0.056
																								Crebl2	2.03372	0.00763816	1	0.117048	0.0512821	Tm2d3	0.656386	0.0342859	1	0.106796	0.176
																								Atl2	1.66049	0.00766042	1	0.188295	0.106838	Snrk	1.50749	0.0343462	1	0.247573	0.181333
																								Tubb5	0.612396	0.00767703	1	0.249364	0.32906	Ttc1	0.628052	0.0343511	1	0.121359	0.194667
																								Ifi27	0.592303	0.00769387	1	0.249364	0.324786	Glul	1.35229	0.0343807	1	0.470874	0.450667
																								Mpnd	1.33259	0.00773498	1	0.374046	0.264957	Was	0.82136	0.0344395	1	0.373786	0.496
																								Erich1	2.25899	0.00774786	1	0.119593	0.0555556	Akr1a1	1.13388	0.0345723	1	0.781553	0.738667
																								Fem1a	1.65877	0.00775143	1	0.21374	0.128205	Myo18a	1.37453	0.0345739	1	0.325243	0.258667
																								Kcnq1ot1	2.00324	0.00775856	1	0.142494	0.0726496	Fmr1	0.700871	0.0345884	1	0.0631068	0.122667
																								Ugt2b38	0.431719	0.00776894	1	0.0636132	0.123932	Mrpl12	0.843249	0.0348116	1	0.271845	0.392
																								Zfp687	1.98843	0.00782573	1	0.117048	0.0512821	Yars	0.651117	0.0349436	1	0.0776699	0.141333
																								Mdn1	1.95103	0.00784523	1	0.16285	0.0897436	Por	0.799602	0.0349941	1	0.203883	0.301333
																								Ube2q1	1.86974	0.00785289	1	0.155216	0.0811966	Exosc10	0.693193	0.0351249	1	0.145631	0.224
																								Fnbp1	1.81243	0.00786085	1	0.170483	0.0940171	Golga5	0.76927	0.0351338	1	0.135922	0.218667
																								Abca5	1.7761	0.00790791	1	0.122137	0.0555556	Aff4	0.714612	0.035264	1	0.11165	0.184
																								Mprip	1.33799	0.00791761	1	0.43257	0.311966	Slc25a12	0.674398	0.0352845	1	0.135922	0.210667
																								Lgals4	1.65543	0.00791765	1	0.124682	0.0555556	Usp48	0.670396	0.0352912	1	0.150485	0.229333
																								Slc22a18	1.60088	0.00792294	1	0.175573	0.0940171	Usp9x	0.843298	0.0353079	1	0.179612	0.272
																								Gm26532	2.2278	0.00794365	1	0.109415	0.0470085	Twistnb	0.809188	0.0353249	1	0.184466	0.285333
																								Git1	1.68149	0.0079485	1	0.178117	0.0982906	Reep4	0.691017	0.0354273	1	0.106796	0.176
																								Grsf1	1.29032	0.00795141	1	0.493639	0.363248	Ccdc127	0.589882	0.0354583	1	0.0533981	0.106667
																								Ddx50	1.46389	0.00797311	1	0.348601	0.239316	Med25	0.76162	0.0354765	1	0.150485	0.237333
																								Utrn	1.40399	0.00801719	1	0.264631	0.162393	Cep250	1.92732	0.035539	1	0.15534	0.101333
																								Clcn7	1.79214	0.0080381	1	0.13486	0.0641026	Atxn2l	0.834836	0.0359186	1	0.34466	0.458667
																								Cdc42bpa	1.58157	0.00803999	1	0.195929	0.111111	Gpr137b-ps	0.809651	0.0359613	1	0.218447	0.322667
																								Irf2bp1	2.21401	0.00804306	1	0.10687	0.0470085	1810058I24Rik	0.817186	0.0359828	1	0.42233	0.549333
																								Marf1	2.79661	0.00808817	1	0.10687	0.0470085	Eea1	0.645145	0.0359938	1	0.126214	0.2
																								Ywhab	1.27713	0.0080956	1	0.592875	0.448718	Ndufa9	0.786691	0.0359984	1	0.131068	0.210667
																								Mms19	1.69011	0.00810203	1	0.19084	0.111111	Tppp3	0.760741	0.0360447	1	0.237864	0.322667
																								Macrod1	1.60249	0.0081047	1	0.223919	0.136752	Dnase1l1	0.830465	0.0360491	1	0.242718	0.357333
																								Ash2l	1.77284	0.00810541	1	0.165394	0.0897436	Isoc1	0.673638	0.0360878	1	0.0582524	0.114667
																								Ube2z	1.74377	0.0081241	1	0.195929	0.115385	Sec23b	0.814678	0.0361287	1	0.135922	0.218667
																								Ica1	2.19381	0.00814751	1	0.119593	0.0555556	Thoc6	0.740884	0.0361937	1	0.11165	0.184
																								Gtf2ird1	1.55654	0.00818464	1	0.223919	0.136752	Exosc9	0.615585	0.036297	1	0.0776699	0.136
																								Bloc1s5	1.8027	0.00818902	1	0.155216	0.0811966	Aph1a	0.813277	0.0363145	1	0.475728	0.562667
																								Polr2g	1.30754	0.00819659	1	0.37659	0.260684	Rfc1	0.778058	0.0363305	1	0.150485	0.232
																								Rps27	1.12234	0.00825774	1	0.926209	0.837607	Rps6kb2	0.768076	0.0363386	1	0.11165	0.184
																								Ccni	1.26854	0.00826088	1	0.531807	0.41453	Mvb12a	0.775173	0.0363869	1	0.252427	0.349333
																								Ndfip1	0.872937	0.00829904	1	0.704835	0.696581	Rrbp1	0.834871	0.0364394	1	0.57767	0.690667
																								Ranbp10	1.55897	0.00830508	1	0.173028	0.0940171	Ipo9	2.34593	0.0364509	1	0.116505	0.0693333
																								Tra2a	1.53088	0.00831126	1	0.328244	0.230769	Utp14a	0.779427	0.0365488	1	0.165049	0.256
																								Gnai1	1.36447	0.00831208	1	0.323155	0.217949	Napg	0.778566	0.0365553	1	0.223301	0.317333
																								Rrp8	1.53381	0.00831419	1	0.231552	0.141026	Laptm5	0.961232	0.0366445	1	0.936893	0.946667
																								Prkx	1.88613	0.00835115	1	0.178117	0.102564	Ipo5	0.676624	0.0367496	1	0.106796	0.178667
																								Shoc2	1.69534	0.0083519	1	0.198473	0.115385	Nop14	0.611526	0.0367772	1	0.0679612	0.125333
																								Med1	1.56975	0.00836229	1	0.206107	0.119658	Max	0.854884	0.0367893	1	0.291262	0.421333
																								Arpc2	1.2302	0.0083768	1	0.6743	0.529915	Calm3	0.83197	0.0368596	1	0.475728	0.578667
																								Ube2k	1.29064	0.00838434	1	0.440204	0.324786	Dus3l	0.735378	0.0369555	1	0.126214	0.202667
																								Ppp1r12c	2.03563	0.00839331	1	0.137405	0.0683761	Cxcl16	0.583387	0.0370072	1	0.0582524	0.112
																								Ranbp3	1.55914	0.00843353	1	0.195929	0.115385	Map4	0.787949	0.0370295	1	0.174757	0.266667
																								Fam173b	1.59332	0.00843505	1	0.234097	0.149573	Srsf7	0.83005	0.037083	1	0.470874	0.592
																								Apoe	1.32693	0.00848605	1	0.374046	0.260684	Stk10	1.1911	0.0370941	1	0.650485	0.626667
																								Vps13b	1.80898	0.00849695	1	0.180662	0.102564	Ddi2	0.691378	0.0371123	1	0.228155	0.314667
																								Nsd1	1.52881	0.00852075	1	0.249364	0.15812	Cers6	0.719201	0.0372276	1	0.276699	0.365333
																								Cramp1l	2.3776	0.00853327	1	0.101781	0.042735	Hmgcs1	0.636492	0.0372291	1	0.15534	0.226667
																								Rgs11	1.294	0.00854429	1	0.338422	0.230769	Ier3ip1	0.827393	0.037476	1	0.441748	0.557333
																								Slc25a36	1.39666	0.00859164	1	0.318066	0.217949	Ankrd12	0.621217	0.0376733	1	0.169903	0.245333
																								Fndc3b	1.52762	0.00860807	1	0.229008	0.145299	Plagl2	1.68101	0.0377039	1	0.203883	0.144
																								Hmbs	1.40974	0.0086117	1	0.300254	0.200855	Sft2d2	0.812268	0.037734	1	0.0873786	0.154667
																								Arid1a	1.3269	0.00861308	1	0.323155	0.213675	Ubqln1	0.764164	0.0378048	1	0.145631	0.229333
																								Rbbp6	1.66533	0.00865486	1	0.226463	0.141026	Mum1	0.600035	0.0380259	1	0.0728155	0.130667
																								Mon2	1.75188	0.0086705	1	0.165394	0.0897436	Gaa	0.638054	0.038137	1	0.101942	0.168
																								Yipf5	1.2885	0.00867769	1	0.356234	0.239316	Timm9	0.560863	0.0381372	1	0.0582524	0.112
																								Wsb2	1.56653	0.00871278	1	0.264631	0.175214	3110002H16Rik	0.725423	0.0382202	1	0.140777	0.218667
																								Bckdha	1.24943	0.00872386	1	0.544529	0.431624	Sqstm1	0.868328	0.0382335	1	0.699029	0.789333
																								Atxn2	1.58119	0.00873173	1	0.26972	0.179487	Pias1	0.768706	0.0383537	1	0.223301	0.322667
																								Psme4	1.53387	0.00873642	1	0.231552	0.145299	Dync1li1	0.806446	0.038483	1	0.179612	0.266667
																								Zbtb37	1.81344	0.00876448	1	0.114504	0.0512821	Pkig	0.775516	0.0385254	1	0.179612	0.261333
																								Rnps1	1.4376	0.00877302	1	0.328244	0.226496	Ndfip1	0.817145	0.038556	1	0.427184	0.549333
																								Arhgef16	1.46291	0.00877683	1	0.251908	0.162393	Mat2a	0.820697	0.0389579	1	0.451456	0.552
																								Grhl2	2.05494	0.00879326	1	0.129771	0.0641026	Dlst	0.860744	0.0389587	1	0.286408	0.4
																								Arfgef2	1.42633	0.0088264	1	0.277354	0.179487	Cebpzos	0.679608	0.0389693	1	0.106796	0.176
																								Slc7a6os	2.25811	0.00885524	1	0.101781	0.042735	Cd44	1.10526	0.0391457	1	0.699029	0.733333
																								Samd4b	1.55559	0.00885628	1	0.216285	0.128205	Prkar1a	0.838366	0.0391515	1	0.524272	0.64
																								Tmc6	1.72878	0.00886644	1	0.19084	0.111111	Sirt2	0.787161	0.0391691	1	0.300971	0.405333
																								Rbm26	1.80052	0.00888197	1	0.188295	0.111111	Mphosph8	0.686602	0.0392571	1	0.0776699	0.138667
																								Cbx7	1.55419	0.00891026	1	0.262087	0.17094	Maea	0.84388	0.0392963	1	0.223301	0.330667
																								Nrbp1	1.39713	0.00891194	1	0.277354	0.175214	Smg1	0.856091	0.0393014	1	0.276699	0.392
																								Kdm4c	1.82877	0.008927	1	0.132316	0.0641026	Tinf2	0.656354	0.0393204	1	0.0873786	0.149333
																								Rps27l	1.19503	0.0089557	1	0.801527	0.67094	Mrpl35	0.668866	0.0393269	1	0.160194	0.24
																								Atf7ip	1.46808	0.0089566	1	0.231552	0.145299	Pebp1	0.840873	0.0393353	1	0.330097	0.445333
																								Pccb	1.24061	0.00896252	1	0.575064	0.461538	Leprotl1	0.796057	0.0393359	1	0.31068	0.416
																								Dcaf17	1.78843	0.0089665	1	0.150127	0.0769231	Shoc2	1.76339	0.0395246	1	0.184466	0.128
																								Nsun7	2.05796	0.00897828	1	0.114504	0.0512821	Slc25a37	1.58318	0.0396895	1	0.126214	0.0746667
																								Dync1li2	1.96658	0.00900554	1	0.178117	0.102564	H2-Q4	0.884377	0.0396968	1	0.665049	0.744
																								Wasl	1.24607	0.00902395	1	0.51145	0.376068	Psme4	0.701016	0.039703	1	0.0970874	0.162667
																								Pcna	1.63382	0.00903247	1	0.223919	0.141026	4930453N24Rik	0.673901	0.0397093	1	0.116505	0.186667
																								Kctd20	2.1099	0.00906405	1	0.10687	0.0470085	Hist1h2bc	1.42951	0.0397427	1	0.339806	0.277333
																								Cdc27	1.91924	0.00907338	1	0.119593	0.0555556	Eif2b2	0.836052	0.0397727	1	0.169903	0.256
																								Mtdh	1.28426	0.00907573	1	0.424936	0.307692	Obfc1	0.759169	0.0398804	1	0.106796	0.176
																								Fahd1	1.24583	0.00908926	1	0.641221	0.495726	Adprh	0.764274	0.0398843	1	0.271845	0.368
																								Fam214b	1.70731	0.00910723	1	0.155216	0.0811966	Ppih	0.523257	0.0398872	1	0.0582524	0.112
																								Dcaf7	1.60309	0.00911489	1	0.229008	0.141026	Slc29a3	0.586393	0.0399458	1	0.131068	0.2
																								Eif2s3x	1.55439	0.00912184	1	0.302799	0.213675	Rps12-ps3	0.817317	0.0401263	1	0.315534	0.434667
																								L1cam	1.46758	0.00912238	1	0.211196	0.123932	Ubl4a	0.725032	0.0401612	1	0.106796	0.176
																								Synrg	2.11645	0.00914578	1	0.139949	0.0726496	Eif2s3x	0.738966	0.0401714	1	0.184466	0.269333
																								Knop1	1.27033	0.00915469	1	0.43257	0.311966	Akap10	0.723842	0.0402049	1	0.11165	0.181333
																								Pfn2	1.23112	0.00916223	1	0.610687	0.504274	Sltm	0.810789	0.0402223	1	0.23301	0.333333
																								Smc3	1.54477	0.00920824	1	0.234097	0.145299	Sec61b	0.888279	0.0403676	1	0.718447	0.778667
																								Arhgef11	1.52468	0.00921238	1	0.155216	0.0811966	Kdm6b	0.827814	0.0404149	1	0.485437	0.637333
																								Armc8	1.74454	0.00921473	1	0.160305	0.0854701	Arhgap27	0.761399	0.0404304	1	0.174757	0.264
																								Samd9l	1.43117	0.00923034	1	0.338422	0.235043	Rpl36-ps3	0.63701	0.0405192	1	0.0679612	0.125333
																								Snw1	1.32402	0.00927654	1	0.381679	0.273504	Ltbr	0.825871	0.0405656	1	0.407767	0.538667
																								Rtn3	0.846572	0.00929279	1	0.620865	0.628205	Mospd3	0.767385	0.0406457	1	0.223301	0.322667
																								Dpp3	1.91803	0.00930077	1	0.175573	0.102564	Fam58b	0.576689	0.0407097	1	0.0679612	0.125333
																								Snhg12	1.52875	0.00932421	1	0.272265	0.179487	Poldip3	0.841343	0.0407209	1	0.213592	0.312
																								Nefl	2.24909	0.00934316	1	0.10687	0.0470085	Gosr1	0.684409	0.0407886	1	0.0970874	0.162667
																								Rwdd1	1.23623	0.00940539	1	0.524173	0.388889	Parp2	0.773753	0.0408411	1	0.15534	0.237333
																								Tfeb	1.52614	0.00942439	1	0.223919	0.141026	Rer1	0.838154	0.0409028	1	0.485437	0.608
																								Cdk16	1.31223	0.0094342	1	0.424936	0.311966	Rbx1	0.864358	0.0411393	1	0.606796	0.698667
																								Slc2a8	1.70207	0.00943632	1	0.208651	0.128205	Atp5j2	0.910671	0.0411687	1	0.723301	0.768
																								Guf1	1.53514	0.00943764	1	0.256997	0.17094	Zfp593	0.666247	0.0411757	1	0.121359	0.192
																								Stx5a	1.3854	0.00944544	1	0.356234	0.252137	Rap1gds1	0.781344	0.041273	1	0.160194	0.245333
																								Rsph3b	2.05042	0.00945945	1	0.119593	0.0555556	Tmem109	0.777112	0.0413091	1	0.252427	0.346667
																								2610507B11Rik	1.2358	0.00947644	1	0.508906	0.393162	Ciao1	0.616651	0.0413316	1	0.092233	0.154667
																								Gripap1	1.71012	0.00948881	1	0.160305	0.0854701	Snapc5	0.835374	0.0414487	1	0.257282	0.357333
																								Sp1	1.47154	0.00965648	1	0.178117	0.0982906	Cdc37	0.832806	0.0414796	1	0.412621	0.533333
																								Map3k9	1.87276	0.00969447	1	0.101781	0.042735	Atp6v0b	0.893904	0.0414882	1	0.737864	0.826667
																								Aff4	1.38063	0.00969882	1	0.295165	0.196581	Tgoln1	0.747751	0.0415594	1	0.271845	0.36
																								Col4a5	1.65957	0.00971315	1	0.170483	0.0940171	2310022A10Rik	0.728125	0.0416238	1	0.145631	0.221333
																								Upf2	1.95512	0.00973551	1	0.132316	0.0641026	Ccdc186	0.659326	0.0417008	1	0.0776699	0.138667
																								Cobl	1.3935	0.0097442	1	0.290076	0.183761	Klhl20	0.736585	0.0418972	1	0.0631068	0.12
																								Exoc4	1.83253	0.0097731	1	0.198473	0.123932	Gm6377	0.805982	0.0419172	1	0.300971	0.394667
																								Tgs1	1.73776	0.00978232	1	0.180662	0.102564	Gpat4	0.651177	0.0419466	1	0.131068	0.2
																								Cnksr3	1.88647	0.00978386	1	0.119593	0.0555556	Minpp1	0.718308	0.0419842	1	0.101942	0.168
																								Minos1	0.947841	0.00979048	1	0.898219	0.850427	Fam111a	0.775908	0.0420012	1	0.281553	0.384
																								Arl6ip4	1.41984	0.00979276	1	0.333333	0.230769	Rnf11	2.08366	0.0420076	1	0.116505	0.0693333
																								Aak1	1.76219	0.00980348	1	0.206107	0.128205	Gpi1	0.874001	0.0421369	1	0.665049	0.765333
																								Actr3	1.2918	0.00980945	1	0.496183	0.371795	Asb8	0.621406	0.0422583	1	0.0631068	0.117333
																								Dusp3	1.44071	0.00983081	1	0.239186	0.145299	Evi2a	0.823666	0.0422645	1	0.354369	0.464
																								Ccz1	1.59693	0.00987214	1	0.185751	0.106838	Usp36	0.506531	0.0422664	1	0.0825243	0.141333
																								F3	1.78326	0.00989805	1	0.16285	0.0897436	Glipr1	1.38651	0.0423237	1	0.349515	0.298667
																								Mtmr12	2.04807	0.00991122	1	0.129771	0.0641026	Fas	1.95861	0.0423242	1	0.135922	0.0853333
																								Psme2	1.24746	0.00991745	1	0.506361	0.376068	Ppil3	0.561115	0.0423261	1	0.0582524	0.112
																								Klf13	1.42557	0.00992754	1	0.188295	0.106838	Rpl3l	1.98365	0.0423303	1	0.116505	0.0693333
																								Abtb1	1.61394	0.00993188	1	0.201018	0.119658	Coa5	0.743893	0.0423355	1	0.140777	0.221333
																								Arf2	1.94779	0.0099369	1	0.119593	0.0555556	Slc3a2	0.773112	0.0423553	1	0.364078	0.466667
																								Gstp1	0.869021	0.00995966	1	0.727735	0.705128	Yipf5	0.818272	0.0424123	1	0.208738	0.301333
																								Ndufs2	0.937904	0.0100161	1	0.872774	0.833333	Slc31a1	0.807065	0.042466	1	0.160194	0.24
																								4930453N24Rik	1.441	0.0100332	1	0.267176	0.17094	Spty2d1	0.667735	0.0427321	1	0.11165	0.181333
																								Casp8ap2	2.16441	0.0100336	1	0.10687	0.0470085	Apip	0.638301	0.0427614	1	0.0873786	0.149333
																								Rab31	1.42714	0.010035	1	0.178117	0.0982906	Zfp608	0.818514	0.0428053	1	0.0970874	0.165333
																								Chkb	1.30119	0.0100507	1	0.414758	0.299145	Acot7	0.707584	0.0428748	1	0.0873786	0.152
																								Camsap3	1.5574	0.0100552	1	0.101781	0.042735	Mrpl22	0.743595	0.0429301	1	0.165049	0.24
																								Tomm7	1.16562	0.0101	1	0.875318	0.739316	Atpaf2	0.592884	0.0429819	1	0.0533981	0.104
																								Tbcel	1.49365	0.0101087	1	0.244275	0.153846	Ncor1	1.30538	0.0430184	1	0.470874	0.426667
																								Znrf3	2.108	0.0101344	1	0.129771	0.0641026	Nr1h3	0.674279	0.0430246	1	0.0679612	0.122667
																								Ugdh	1.61331	0.0101401	1	0.101781	0.042735	Flcn	0.763627	0.0430346	1	0.150485	0.232
																								Vdac2	0.933244	0.0101429	1	0.844784	0.803419	Keap1	0.801201	0.0430801	1	0.150485	0.234667
																								Cdkl1	1.21694	0.0101459	1	0.643766	0.504274	9430038I01Rik	0.76021	0.0430861	1	0.179612	0.269333
																								Mfap1b	1.45549	0.0101506	1	0.24173	0.149573	Slc2a6	1.32995	0.0431054	1	0.296117	0.224
																								Dopey1	1.84585	0.0102421	1	0.124682	0.0598291	Rc3h1	0.690018	0.0431995	1	0.092233	0.154667
																								Ogdh	1.17869	0.0102537	1	0.862595	0.713675	Zfp444	0.577454	0.043201	1	0.0533981	0.104
																								Polr2b	1.82999	0.0102564	1	0.195929	0.119658	Slc43a2	1.55118	0.0432303	1	0.291262	0.24
																								Golgb1	1.29293	0.0102961	1	0.447837	0.337607	Mak16	0.695709	0.0432681	1	0.126214	0.2
																								Pex3	1.56896	0.0103073	1	0.193384	0.111111	Cc2d1a	0.598779	0.0432967	1	0.0825243	0.141333
																								Snrpc	1.42599	0.010355	1	0.267176	0.175214	Rpf2	0.633336	0.0433128	1	0.0873786	0.149333
																								Mrpl10	1.30546	0.0103616	1	0.374046	0.260684	Daglb	0.75255	0.043313	1	0.23301	0.32
																								Ube2e2	1.94239	0.0103673	1	0.10687	0.0470085	Kpna4	1.52708	0.0433679	1	0.334951	0.277333
																								2510002D24Rik	1.40873	0.0103799	1	0.318066	0.226496	Rad17	0.661465	0.0433918	1	0.0728155	0.130667
																								Scg5	2.43878	0.010424	1	0.104326	0.0470085	Atox1	0.878845	0.0434636	1	0.68932	0.768
																								Nqo1	1.73172	0.0105123	1	0.157761	0.0854701	Rab10	0.811174	0.0435617	1	0.31068	0.410667
																								Cdc5l	1.5811	0.0105155	1	0.236641	0.153846	Ilk	0.824934	0.0435888	1	0.42233	0.541333
																								Fam21	1.40889	0.0105253	1	0.315522	0.213675	Calu	0.779477	0.0436165	1	0.11165	0.186667
																								Mief2	1.83013	0.0105322	1	0.13486	0.0683761	Rps24	1.01295	0.0437447	1	0.883495	0.890667
																								1810043H04Rik	1.20191	0.0105667	1	0.557252	0.41453	Trmt1l	0.662259	0.043837	1	0.0970874	0.162667
																								Morf4l2	1.27279	0.0105889	1	0.396947	0.290598	Prdx6	0.837565	0.0439231	1	0.514563	0.610667
																								Tfpt	1.47849	0.0105981	1	0.173028	0.0940171	Fbxl20	1.60374	0.0439268	1	0.174757	0.12
																								Acox1	1.28412	0.0106083	1	0.435115	0.299145	Eny2	0.810936	0.0441043	1	0.271845	0.378667
																								Lnx2	2.37331	0.0106259	1	0.104326	0.0470085	Sf3b4	0.862295	0.0441954	1	0.247573	0.362667
																								Rbm28	1.73452	0.01063	1	0.180662	0.106838	Btbd9	0.754521	0.0444483	1	0.169903	0.248
																								Ubap2	1.69249	0.0106666	1	0.170483	0.0982906	G0s2	1.3605	0.0444518	1	0.242718	0.173333
																								Pdilt	0.442949	0.0106736	1	0.0839695	0.145299	Apex1	0.883299	0.0444958	1	0.0970874	0.165333
																								Ankhd1	1.55394	0.0107443	1	0.254453	0.17094	Mob3b	0.75459	0.0445365	1	0.174757	0.256
																								Thoc7	1.24038	0.0107474	1	0.493639	0.380342	Dcakd	0.748621	0.044593	1	0.140777	0.218667
																								Zrsr2	1.37499	0.0107622	1	0.287532	0.188034	Gm10073	0.603767	0.0446556	1	0.0776699	0.136
																								Pml	1.55669	0.010766	1	0.264631	0.179487	Bcl2a1d	0.787167	0.0447174	1	0.315534	0.405333
																								Zfp335	1.86325	0.0107695	1	0.111959	0.0512821	Ech1	0.854858	0.0447192	1	0.368932	0.477333
																								Cux1	1.2169	0.010784	1	0.516539	0.397436	Srpk2	0.630956	0.0447666	1	0.0679612	0.122667
																								Otub1	1.32202	0.0107856	1	0.447837	0.346154	Mettl23	0.787679	0.0449172	1	0.257282	0.354667
																								Smpd1	0.753624	0.0107874	1	0.430025	0.5	Gba2	0.613684	0.0449231	1	0.0679612	0.122667
																								Ajuba	1.71949	0.0108512	1	0.170483	0.0982906	Slc38a10	0.787768	0.0449608	1	0.18932	0.274667
																								Gtf2f1	1.32258	0.01087	1	0.24173	0.149573	Ppfia4	0.803853	0.0450027	1	0.31068	0.413333
																								Zfp329	1.50762	0.0108746	1	0.16285	0.0854701	Il17ra	1.16263	0.0450279	1	0.669903	0.629333
																								Nfib	1.50299	0.0108995	1	0.256997	0.166667	Tmem50b	0.785913	0.0451072	1	0.334951	0.426667
																								H2afj	1.1492	0.0109217	1	0.847328	0.735043	Swap70	0.690183	0.0451264	1	0.0825243	0.141333
																								9130401M01Rik	1.67269	0.010922	1	0.152672	0.0811966	Cox6b1	0.906383	0.0451822	1	0.762136	0.821333
																								Rab10os	1.62674	0.0109718	1	0.21374	0.132479	Snrnp27	0.773786	0.0452263	1	0.218447	0.301333
																								Malat1	1.10935	0.0110108	1	0.811705	0.858974	Atp1a1	1.15275	0.0452882	1	0.723301	0.672
																								Anapc4	1.34868	0.0110136	1	0.183206	0.102564	Tor3a	0.76773	0.0452908	1	0.169903	0.245333
																								Ube2h	1.61472	0.0110273	1	0.16285	0.0897436	Tcn2	0.817448	0.0454161	1	0.305825	0.408
																								Zxdc	2.14921	0.0111309	1	0.104326	0.0470085	Parp9	0.792683	0.0455547	1	0.121359	0.194667
																								Trpc4ap	1.59307	0.011168	1	0.234097	0.149573	Nhsl2	1.79894	0.0455839	1	0.199029	0.144
																								Nae1	1.5067	0.0111902	1	0.229008	0.141026	Mylip	1.78355	0.045705	1	0.160194	0.106667
																								Ipo8	1.75938	0.0111978	1	0.167939	0.0940171	Psmb2	0.857339	0.0457182	1	0.533981	0.626667
																								Srek1ip1	1.28478	0.0112174	1	0.435115	0.32906	Rhno1	0.624146	0.0459129	1	0.0970874	0.16
																								Rsrc1	1.48842	0.0112511	1	0.234097	0.149573	Prkag2	0.801511	0.0460106	1	0.126214	0.2
																								Cyp4b1	0.451373	0.0112738	1	0.0916031	0.153846	Nras	0.801533	0.0461027	1	0.184466	0.274667
																								Dcp1b	2.05441	0.0113015	1	0.122137	0.0598291	Cstf2t	0.662281	0.0461082	1	0.0582524	0.112
																								Rhbdd2	1.44788	0.0113499	1	0.262087	0.17094	Tapbp	0.842023	0.0461723	1	0.519417	0.621333
																								Mgst1	0.828227	0.011354	1	0.636132	0.628205	Armcx3	0.557542	0.0463478	1	0.0631068	0.114667
																								Mapkap1	1.32339	0.0113547	1	0.292621	0.200855	Timm10b	0.833413	0.0465241	1	0.485437	0.594667
																								Rps6ka6	1.50677	0.011356	1	0.229008	0.145299	Irf2bpl	0.743857	0.0465262	1	0.160194	0.24
																								Abat	0.625534	0.0113826	1	0.157761	0.235043	N4bp1	1.49824	0.0465902	1	0.291262	0.237333
																								H2afz	0.838854	0.0114315	1	0.684478	0.683761	Cinp	0.649579	0.0466023	1	0.0533981	0.104
																								Dcun1d5	1.44766	0.0114441	1	0.239186	0.153846	Ly9	0.5767	0.046692	1	0.0728155	0.128
																								Jag1	1.5673	0.0114732	1	0.195929	0.115385	Csf2rb2	0.606609	0.0467365	1	0.092233	0.152
																								Arrb2	1.94275	0.011475	1	0.117048	0.0555556	Apmap	0.685236	0.0468183	1	0.0825243	0.141333
																								Add1	1.45099	0.0114768	1	0.340967	0.24359	Tbcb	0.802811	0.0468197	1	0.368932	0.477333
																								Utp3	1.27915	0.0114877	1	0.320611	0.213675	Vps72	0.824693	0.0468802	1	0.165049	0.256
																								Rps15	1.16309	0.0115057	1	0.847328	0.713675	Psme2	0.859874	0.0469525	1	0.601942	0.688
																								Psmd7	1.25233	0.0115096	1	0.470738	0.337607	Ube2d2a	0.866767	0.0470855	1	0.543689	0.634667
																								Hnrnpab	1.31913	0.0115174	1	0.396947	0.307692	Mms19	0.61063	0.0471764	1	0.092233	0.152
																								Fbxl8	0.468799	0.0115758	1	0.0559796	0.111111	Tspan31	0.787885	0.0472206	1	0.26699	0.36
																								Rnf139	1.78284	0.0115927	1	0.195929	0.119658	Tbc1d9	0.671463	0.0473388	1	0.0970874	0.16
																								Zcrb1	1.19941	0.0115979	1	0.656489	0.521368	Acad9	0.434597	0.0473528	1	0.0533981	0.101333
																								Msl3	1.71546	0.0116132	1	0.216285	0.136752	Odc1	0.50104	0.047526	1	0.0728155	0.125333
																								Snrpa	1.37511	0.0116555	1	0.335878	0.239316	Ube2i	0.868521	0.0475566	1	0.606796	0.698667
																								Stt3b	1.3733	0.0116593	1	0.262087	0.166667	Cyth1	1.40788	0.0476449	1	0.334951	0.28
																								Mrto4	1.61723	0.0116635	1	0.198473	0.119658	Strada	0.76912	0.0476474	1	0.092233	0.157333
																								Fgfr1	1.64371	0.0116653	1	0.124682	0.0598291	Rnf187	0.799095	0.0476933	1	0.412621	0.514667
																								Aftph	1.45213	0.0117062	1	0.236641	0.149573	Ddx47	0.840277	0.0477059	1	0.262136	0.362667
																								Ssu72	1.24047	0.0117245	1	0.468193	0.350427	Tysnd1	0.623111	0.0477104	1	0.0776699	0.136
																								Ppp1r35	1.7349	0.0117375	1	0.188295	0.115385	Stx12	0.821325	0.0477108	1	0.213592	0.309333
																								Tspyl2	1.81822	0.0117885	1	0.13486	0.0683761	Sash3	0.844292	0.0477212	1	0.330097	0.448
																								Mterf3	1.35174	0.0117993	1	0.262087	0.17094	Adamts10	0.649321	0.0478051	1	0.101942	0.165333
																								Tspo	0.866586	0.0118185	1	0.704835	0.683761	Sar1b	0.786568	0.0478588	1	0.271845	0.368
																								Nfkbia	1.3399	0.0118194	1	0.358779	0.25641	Elf1	0.840415	0.0479293	1	0.286408	0.4
																								Sec13	1.2499	0.0118254	1	0.486005	0.34188	Mapk7	0.751499	0.0480315	1	0.106796	0.173333
																								Plgrkt	1.5917	0.0118671	1	0.264631	0.183761	Ngly1	0.838351	0.048034	1	0.140777	0.224
																								Plekha8	1.74091	0.0119239	1	0.109415	0.0512821	Tnfrsf13b	0.798393	0.0480488	1	0.218447	0.309333
																								Tollip	1.53536	0.0120068	1	0.21883	0.132479	Ythdf2	0.784794	0.0480567	1	0.23301	0.325333
																								Dusp1	1.38137	0.0120362	1	0.417303	0.320513	Lpar6	0.832529	0.0482418	1	0.300971	0.402667
																								Ampd3	1.39335	0.0120525	1	0.21883	0.132479	Wdr48	0.850255	0.0483367	1	0.092233	0.157333
																								Exoc5	1.679	0.0120815	1	0.185751	0.111111	Ralgapa1	0.56048	0.0484908	1	0.0631068	0.114667
																								Elmo2	1.78077	0.0120866	1	0.152672	0.0811966	Ppp2r1a	0.80876	0.0485046	1	0.383495	0.488
																								Myo10	1.23813	0.0120897	1	0.470738	0.350427	Cnpy3	0.814634	0.0485243	1	0.349515	0.450667
																								Epb41l4aos	1.67838	0.0121107	1	0.198473	0.119658	Cir1	0.868331	0.0487324	1	0.140777	0.221333
																								Tmem256	1.18658	0.0121331	1	0.791349	0.653846	Mfap1b	0.785078	0.0487918	1	0.160194	0.237333
																								Elovl1	0.623192	0.0121342	1	0.234097	0.311966	Vps37c	0.749553	0.0490343	1	0.092233	0.157333
																								Uba52	0.988661	0.012149	1	0.982188	0.965812	Tmem168	0.774562	0.0490924	1	0.101942	0.168
																								Mark2	1.38746	0.0121576	1	0.335878	0.24359	Txnrd1	0.746879	0.0492126	1	0.0970874	0.162667
																								Tmem117	1.67856	0.012191	1	0.119593	0.0555556	Rexo2	0.818455	0.04932	1	0.349515	0.450667
																								Fam174a	1.26415	0.0122154	1	0.521628	0.405983	Mrps5	0.675075	0.0493443	1	0.135922	0.205333
																								Xpo6	1.72717	0.0122469	1	0.175573	0.102564	Psmd11	0.770181	0.0493713	1	0.286408	0.376
																								Atg4a	1.96069	0.0122532	1	0.127226	0.0641026	Cyfip1	0.834733	0.04955	1	0.315534	0.421333
																								Mob4	1.28696	0.0122819	1	0.384224	0.264957	Bmyc	0.763338	0.0496794	1	0.203883	0.288
																								Wdr45b	1.62759	0.0123171	1	0.221374	0.141026	Mknk1	0.742697	0.0498713	1	0.237864	0.325333
																								Srxn1	1.65703	0.0123184	1	0.216285	0.136752	Lrrc8d	1.40758	0.0499176	1	0.276699	0.213333
																								Maml3	2.24937	0.0123265	1	0.124682	0.0641026	Klhdc10	0.627048	0.0499234	1	0.0533981	0.101333
																								Fcho2	1.37288	0.0123838	1	0.333333	0.239316
																								Sestd1	1.27052	0.0123854	1	0.440204	0.316239
																								Sf3b3	1.63848	0.0123909	1	0.234097	0.153846
																								Hnrnpul1	1.44551	0.0124352	1	0.274809	0.188034
																								Pcbd1	0.94524	0.0124524	1	0.844784	0.811966
																								Fstl1	0.409687	0.0124553	1	0.0712468	0.128205
																								Pou3f3	1.20091	0.0124745	1	0.491094	0.367521
																								Gm13594	1.88562	0.0124828	1	0.117048	0.0555556
																								Gm14410	1.90422	0.0124928	1	0.152672	0.0854701
																								Mgll	1.37011	0.0124952	1	0.361323	0.264957
																								Rffl	1.62143	0.012496	1	0.157761	0.0854701
																								Pfdn4	1.49342	0.0124982	1	0.256997	0.166667
																								H2-Q4	0.458197	0.0125014	1	0.0636132	0.119658
																								Crtc3	2.09169	0.0125014	1	0.109415	0.0512821
																								Hdac11	1.25556	0.0125136	1	0.417303	0.290598
																								Arhgap35	1.41545	0.012533	1	0.246819	0.15812
																								Fkbp15	1.44275	0.0125695	1	0.170483	0.0940171
																								Thap4	0.781197	0.0125757	1	0.513995	0.542735
																								Ctdspl2	1.95399	0.0126131	1	0.122137	0.0598291
																								B4galnt1	1.3697	0.0127161	1	0.236641	0.145299
																								Fam173a	0.73537	0.0127437	1	0.402036	0.457265
																								Pitpnc1	0.648727	0.0127871	1	0.129771	0.205128
																								Atg9a	1.62102	0.0127888	1	0.183206	0.106838
																								Nifk	2.00988	0.0128293	1	0.152672	0.0854701
																								Phactr2	1.66777	0.0128308	1	0.180662	0.106838
																								Sidt2	1.5391	0.0129153	1	0.292621	0.205128
																								Gtf2e2	1.57082	0.0129198	1	0.170483	0.0940171
																								Bcl2l13	1.89125	0.012926	1	0.147583	0.0811966
																								Slc25a45	1.4921	0.0129271	1	0.254453	0.166667
																								Usb1	1.75495	0.0129365	1	0.139949	0.0726496
																								Hint3	1.31459	0.012954	1	0.379135	0.273504
																								Clk4	1.35662	0.012966	1	0.407125	0.299145
																								Dnajc19	1.20862	0.0129722	1	0.661578	0.529915
																								Rpl7a	0.96892	0.0129768	1	0.928753	0.888889
																								Chmp2a	1.18115	0.0129807	1	0.669211	0.517094
																								Fzd4	1.26068	0.0130362	1	0.519084	0.397436
																								E130308A19Rik	1.75972	0.0130518	1	0.19084	0.115385
																								Tsen54	1.73849	0.0130569	1	0.198473	0.123932
																								Fgfr1op	1.46571	0.0130674	1	0.239186	0.149573
																								Klc1	1.53577	0.0130722	1	0.145038	0.0769231
																								Zfp330	1.45949	0.0130967	1	0.26972	0.183761
																								Smarcd1	1.72002	0.0131019	1	0.145038	0.0769231
																								Tifa	1.61786	0.0131021	1	0.111959	0.0512821
																								Dnaja3	1.25244	0.0131156	1	0.496183	0.371795
																								Eif2b5	1.50048	0.0131462	1	0.223919	0.141026
																								Zc3h6	1.57889	0.0131753	1	0.178117	0.102564
																								Pkn2	1.67085	0.0131849	1	0.198473	0.123932
																								Gsk3a	1.57963	0.0132459	1	0.236641	0.153846
																								Slc2a4	1.3208	0.0132632	1	0.440204	0.32906
																								BC004004	1.20568	0.0132895	1	0.671756	0.534188
																								Adam15	1.39481	0.0132983	1	0.211196	0.123932
																								Mpdu1	1.40073	0.0133126	1	0.277354	0.183761
																								Ppp2cb	1.44373	0.0133167	1	0.16285	0.0897436
																								Csnk1a1	1.26277	0.0133375	1	0.557252	0.452991
																								Prune	1.33629	0.0133378	1	0.256997	0.166667
																								Ube2i	1.26809	0.0133531	1	0.529262	0.405983
																								Osbpl3	1.46649	0.0133643	1	0.226463	0.145299
																								Dus1l	1.4735	0.0134102	1	0.226463	0.141026
																								Vamp5	1.19274	0.0134128	1	0.262087	0.162393
																								Pdp1	2.13725	0.0134447	1	0.114504	0.0555556
																								Neurl1b	2.2793	0.0134577	1	0.124682	0.0641026
																								Fam133b	1.40699	0.0134681	1	0.216285	0.132479
																								Letmd1	1.59507	0.0134776	1	0.211196	0.132479
																								Rrp36	1.41513	0.0134776	1	0.21374	0.128205
																								Polr2a	1.31861	0.013505	1	0.374046	0.273504
																								Csnk1g3	1.77331	0.0135341	1	0.117048	0.0555556
																								Mcee	1.15139	0.0136559	1	0.860051	0.747863
																								Itpr2	1.4042	0.0136745	1	0.262087	0.175214
																								Tmem245	1.49051	0.0136923	1	0.274809	0.183761
																								Tmem55b	1.45931	0.013693	1	0.246819	0.162393
																								Lonp2	1.33617	0.0137032	1	0.335878	0.235043
																								Plaa	1.59825	0.0137197	1	0.201018	0.128205
																								Terf2	1.49636	0.0137244	1	0.111959	0.0512821
																								Cadps2	1.77943	0.0138027	1	0.137405	0.0726496
																								Uba1	1.35835	0.013805	1	0.389313	0.290598
																								4930550C14Rik	1.66674	0.0138089	1	0.117048	0.0555556
																								Ninj1	0.810835	0.0138218	1	0.536896	0.568376
																								BC029722	1.27067	0.0138278	1	0.368957	0.264957
																								Fbxo38	1.61309	0.0138391	1	0.206107	0.128205
																								Ogfrl1	1.86751	0.0138689	1	0.142494	0.0769231
																								Atxn2l	1.3509	0.0138969	1	0.323155	0.230769
																								Galt	1.2664	0.0138977	1	0.445293	0.34188
																								Mon1a	1.45887	0.0139133	1	0.226463	0.141026
																								Nab1	1.46742	0.0139442	1	0.155216	0.0854701
																								Fbrs	2.07992	0.0139475	1	0.145038	0.0811966
																								Fos	1.25059	0.0139605	1	0.478372	0.34188
																								Avpr2	1.47762	0.0139658	1	0.229008	0.145299
																								Ssx2ip	1.90576	0.0139785	1	0.147583	0.0811966
																								Plpp6	1.5568	0.0139806	1	0.175573	0.102564
																								Tbc1d10b	1.82496	0.0139831	1	0.117048	0.0555556
																								Nup43	0.487511	0.0140266	1	0.0508906	0.102564
																								Kif13a	1.76762	0.0140466	1	0.119593	0.0598291
																								Tmem132a	0.403952	0.0140845	1	0.0559796	0.106838
																								Rdh5	1.78212	0.014138	1	0.104326	0.0470085
																								Abca3	1.34774	0.0141672	1	0.295165	0.200855
																								Mrpl55	1.25659	0.014169	1	0.48855	0.376068
																								Dhrs7b	1.65822	0.0141862	1	0.16285	0.0940171
																								2510039O18Rik	1.76801	0.0141912	1	0.150127	0.0811966
																								Ssb	1.34053	0.0142066	1	0.407125	0.290598
																								Alox12	1.38068	0.0142095	1	0.290076	0.196581
																								Rab9	1.30251	0.0142242	1	0.468193	0.367521
																								St13	1.30016	0.0142457	1	0.422392	0.316239
																								Gm26808	2.11497	0.0142496	1	0.114504	0.0555556
																								Tle2	1.42533	0.0143323	1	0.274809	0.183761
																								Letm1	1.25762	0.0143428	1	0.544529	0.452991
																								Rnf114	1.45145	0.0143685	1	0.295165	0.205128
																								Rnf20	1.40084	0.0143816	1	0.216285	0.132479
																								Kdm6a	1.68251	0.0144055	1	0.122137	0.0598291
																								Trappc11	1.6444	0.0144171	1	0.178117	0.102564
																								Tbc1d4	1.83458	0.0144202	1	0.147583	0.0811966
																								Ppp2r5d	1.63248	0.0144368	1	0.145038	0.0769231
																								Mlf2	1.16472	0.0145342	1	0.770992	0.649573
																								Sike1	1.38517	0.0145506	1	0.284987	0.192308
																								Galnt18	1.36781	0.0145578	1	0.29771	0.200855
																								Camk2d	1.31208	0.0145654	1	0.346056	0.247863
																								Wfdc2	1.10128	0.0145871	1	0.961832	0.888889
																								Kdf1	1.36565	0.014606	1	0.358779	0.264957
																								Nbeal1	1.37899	0.0146227	1	0.318066	0.222222
																								Rbpms2	1.41997	0.0146395	1	0.267176	0.179487
																								Cd2ap	1.27373	0.0146492	1	0.447837	0.337607
																								Rnf152	1.99978	0.0146493	1	0.114504	0.0555556
																								Sgms2	1.37197	0.0146497	1	0.307888	0.213675
																								Rps4x	0.975827	0.0146801	1	0.916031	0.871795
																								Abhd12	1.45557	0.0146803	1	0.246819	0.162393
																								Arhgef1	1.33914	0.0146909	1	0.244275	0.15812
																								Eea1	1.42607	0.0146965	1	0.282443	0.192308
																								Stk32b	1.29535	0.0147144	1	0.394402	0.282051
																								Emx2os	1.85011	0.0147224	1	0.109415	0.0512821
																								Glul	1.84558	0.0147316	1	0.183206	0.111111
																								Tceb3	1.66515	0.0147773	1	0.206107	0.132479
																								2022-03-07	1.40449	0.0147822	1	0.307888	0.217949
																								Sap18	1.18056	0.0148205	1	0.791349	0.653846
																								Vars	1.74741	0.0148221	1	0.127226	0.0641026
																								Ttc3	1.33364	0.0148405	1	0.318066	0.213675
																								Piezo1	1.35597	0.0148686	1	0.379135	0.277778
																								Pxk	1.46232	0.0148787	1	0.26972	0.183761
																								Nfkb1	1.79667	0.014887	1	0.132316	0.0683761
																								Epb41	1.1935	0.0149419	1	0.43257	0.303419
																								Camta2	1.585	0.0149559	1	0.170483	0.0982906
																								Hnrnpl	1.19258	0.014962	1	0.577608	0.448718
																								Prkar2a	1.54195	0.0149769	1	0.211196	0.132479
																								Dnajc3	0.748111	0.014977	1	0.440204	0.504274
																								Fam222a	1.73599	0.0149915	1	0.132316	0.0683761
																								Ubxn7	1.52454	0.0149956	1	0.226463	0.145299
																								Elf1	1.43936	0.015037	1	0.259542	0.17094
																								Pcbp1	1.20772	0.015048	1	0.651399	0.534188
																								Pdzd11	1.33926	0.0150557	1	0.361323	0.264957
																								Rabl2	1.65532	0.0151297	1	0.206107	0.132479
																								Brd8	1.46593	0.015148	1	0.24173	0.15812
																								Sipa1l1	1.56413	0.0151611	1	0.122137	0.0598291
																								Rybp	1.51103	0.0151824	1	0.117048	0.0555556
																								Stip1	1.32696	0.0151924	1	0.333333	0.239316
																								Supt4a	1.24159	0.0152104	1	0.496183	0.376068
																								Cdc34	1.43433	0.0152129	1	0.198473	0.123932
																								Tomm40	1.24247	0.0152723	1	0.508906	0.367521
																								Vwa8	1.38883	0.0153101	1	0.292621	0.200855
																								Rheb	1.21996	0.0153111	1	0.679389	0.529915
																								Prkrir	1.58994	0.0153387	1	0.155216	0.0854701
																								Thumpd1	1.72561	0.015349	1	0.157761	0.0897436
																								Csf2ra	1.48632	0.0153585	1	0.231552	0.149573
																								Ap2s1	1.26806	0.0153621	1	0.412214	0.303419
																								Tdg	1.44916	0.0153641	1	0.183206	0.106838
																								Phyh	1.13197	0.015366	1	0.910941	0.820513
																								Pomgnt1	1.33741	0.0153733	1	0.356234	0.25641
																								Pcmtd2	1.35957	0.0153884	1	0.35369	0.252137
																								Ist1	1.30958	0.0154868	1	0.399491	0.294872
																								Dars	1.29667	0.0155259	1	0.37659	0.264957
																								Srm	1.48388	0.0155676	1	0.223919	0.141026
																								Fkbp9	1.56986	0.015601	1	0.160305	0.0897436
																								Suz12	1.69391	0.0156386	1	0.167939	0.0982906
																								Smarca2	1.26284	0.0156683	1	0.473282	0.350427
																								Fibp	1.34388	0.0156913	1	0.335878	0.24359
																								Rab27a	1.79796	0.0157041	1	0.13486	0.0726496
																								Acacb	1.27285	0.0157317	1	0.351145	0.247863
																								Ubr5	1.48632	0.0157438	1	0.264631	0.179487
																								Hmgxb3	1.76993	0.0157716	1	0.124682	0.0641026
																								1110032A03Rik	1.35719	0.0158626	1	0.399491	0.290598
																								Ubac1	1.36888	0.0159026	1	0.366412	0.273504
																								Krcc1	1.24357	0.0159349	1	0.569975	0.452991
																								Nav2	1.40723	0.0159837	1	0.206107	0.123932
																								Rbm25	1.27464	0.016032	1	0.437659	0.32906
																								Mink1	1.23599	0.0160505	1	0.463104	0.350427
																								Zer1	1.63449	0.0160809	1	0.155216	0.0854701
																								Rprd2	1.85743	0.0161396	1	0.188295	0.119658
																								Pdzd8	1.91542	0.0161408	1	0.13486	0.0726496
																								Rhot1	1.42568	0.0161597	1	0.231552	0.145299
																								Dand5	1.6983	0.0161704	1	0.147583	0.0811966
																								Ltv1	1.50918	0.0162053	1	0.160305	0.0897436
																								Kansl2	1.51145	0.0162198	1	0.24173	0.166667
																								Pdpk1	1.49797	0.0162365	1	0.226463	0.145299
																								Upf3b	1.31193	0.0162515	1	0.262087	0.175214
																								Upf3a	1.51339	0.0162901	1	0.229008	0.149573
																								Ptcd1	1.68231	0.0162976	1	0.132316	0.0683761
																								Ddit4l	1.26721	0.016307	1	0.356234	0.25641
																								Acly	1.31992	0.0163359	1	0.328244	0.230769
																								Snapin	1.39115	0.0163453	1	0.26972	0.183761
																								Chuk	1.52119	0.0163466	1	0.21374	0.132479
																								2022-09-02	1.33925	0.0163577	1	0.256997	0.166667
																								Vezf1	1.33555	0.0163818	1	0.340967	0.247863
																								Lrrc66	1.2525	0.016417	1	0.427481	0.320513
																								Gm11695	1.24507	0.016451	1	0.445293	0.324786
																								Fam20b	1.31219	0.0164517	1	0.284987	0.192308
																								Mipol1	1.9295	0.0164741	1	0.101781	0.0470085
																								Nfyb	1.89873	0.0165128	1	0.13486	0.0726496
																								Ids	1.60805	0.0165217	1	0.142494	0.0769231
																								Zdhhc17	1.90305	0.0165608	1	0.101781	0.0470085
																								Mrpl40	1.20825	0.0166008	1	0.465649	0.34188
																								Irf2	1.42781	0.0166112	1	0.26972	0.179487
																								Nemf	1.26102	0.0166277	1	0.249364	0.15812
																								Commd6	1.27505	0.0166524	1	0.450382	0.32906
																								Extl2	1.53849	0.0166783	1	0.236641	0.15812
																								Rpap2	1.62021	0.0167055	1	0.119593	0.0598291
																								Sin3b	1.2666	0.0167319	1	0.435115	0.32906
																								Tns1	1.136	0.0167502	1	0.842239	0.739316
																								Ly6e	0.722488	0.0167504	1	0.366412	0.440171
																								Eif4g2	1.17997	0.0167729	1	0.811705	0.662393
																								Mettl5	1.38511	0.0168065	1	0.21374	0.128205
																								Tnfrsf21	1.38719	0.016824	1	0.302799	0.205128
																								Dcaf8	1.28189	0.016844	1	0.46056	0.350427
																								Polr2l	1.15202	0.0168447	1	0.839695	0.735043
																								Kif5b	1.25755	0.0168528	1	0.430025	0.316239
																								Zfp950	1.4233	0.0168677	1	0.254453	0.17094
																								Sh3pxd2a	1.96051	0.0168682	1	0.117048	0.0598291
																								Arid2	1.58191	0.0168847	1	0.157761	0.0897436
																								Fdx1l	1.34819	0.0169092	1	0.371501	0.273504
																								C2cd3	1.60652	0.016925	1	0.114504	0.0555556
																								Lrp6	1.23538	0.0169533	1	0.412214	0.303419
																								Sde2	1.45	0.016956	1	0.185751	0.111111
																								Rnf123	1.59791	0.016956	1	0.185751	0.111111
																								Ubald1	1.45032	0.0169623	1	0.279898	0.196581
																								Kif12	1.36928	0.0169644	1	0.412214	0.316239
																								Kdm4a	1.50189	0.0169726	1	0.19084	0.115385
																								Zfp622	1.35703	0.0170745	1	0.193384	0.115385
																								Oxgr1	1.65123	0.0171353	1	0.124682	0.0641026
																								Pla2g12a	1.7239	0.0171498	1	0.180662	0.111111
																								Impad1	1.4734	0.0172114	1	0.262087	0.179487
																								Mthfsd	1.57239	0.0172618	1	0.175573	0.102564
																								Cacnb3	1.72913	0.0173004	1	0.147583	0.0811966
																								Ndufb11	0.94573	0.0173592	1	0.926209	0.92735
																								Oaf	1.37071	0.0173653	1	0.340967	0.252137
																								Dhcr7	1.83659	0.0174046	1	0.101781	0.0470085
																								Ccdc130	1.93014	0.0174046	1	0.101781	0.0470085
																								Zfp598	1.67524	0.0174134	1	0.147583	0.0811966
																								Med29	1.30742	0.0174253	1	0.343511	0.239316
																								Shank2	1.38562	0.0174266	1	0.287532	0.196581
																								Zfp131	1.70918	0.0174461	1	0.119593	0.0598291
																								Trmt13	1.87491	0.0174511	1	0.117048	0.0598291
																								Ipmk	1.66426	0.0174883	1	0.203562	0.128205
																								Srpk2	1.41308	0.0174919	1	0.330789	0.24359
																								Cyth1	1.50434	0.0175335	1	0.211196	0.132479
																								Dazap1	1.26226	0.0175366	1	0.307888	0.213675
																								Med15	1.5805	0.0175371	1	0.193384	0.119658
																								Gpat4	1.30071	0.0176119	1	0.290076	0.200855
																								Pabpn1	1.37304	0.0176635	1	0.333333	0.235043
																								Golga1	1.609	0.0176765	1	0.198473	0.123932
																								Ier2	1.21976	0.017722	1	0.46056	0.337607
																								Ctnnbip1	1.49963	0.0177332	1	0.185751	0.111111
																								Flrt1	1.59585	0.0177346	1	0.183206	0.111111
																								Bmpr1a	1.61036	0.0177725	1	0.193384	0.119658
																								Dpcd	1.31267	0.0177805	1	0.358779	0.264957
																								Kif1b	1.40513	0.0177835	1	0.267176	0.183761
																								Dek	1.21893	0.0177957	1	0.531807	0.423077
																								Tmem14a	1.85144	0.0178692	1	0.160305	0.0940171
																								Ptpn18	1.29923	0.0178943	1	0.399491	0.299145
																								Coq7	1.19391	0.0178949	1	0.631043	0.512821
																								Stam2	1.73799	0.0179153	1	0.13486	0.0726496
																								Ddo	1.29264	0.0179776	1	0.340967	0.239316
																								Bag3	1.24121	0.0180058	1	0.348601	0.239316
																								Tgds	1.47189	0.0180115	1	0.188295	0.115385
																								Pnn	1.34554	0.0180118	1	0.368957	0.273504
																								Lrpap1	1.2409	0.0180486	1	0.43257	0.307692
																								Rab8a	1.2477	0.0180546	1	0.358779	0.252137
																								Zdhhc3	1.37582	0.0180777	1	0.244275	0.15812
																								Gclm	1.2396	0.0181088	1	0.419847	0.303419
																								Tor1aip2	1.2707	0.0181395	1	0.478372	0.371795
																								PISD	1.41501	0.0181491	1	0.295165	0.209402
																								Vps54	2.0361	0.0181811	1	0.157761	0.0940171
																								Ythdf3	1.35428	0.0181854	1	0.312977	0.226496
																								Tcea2	2.02175	0.0181914	1	0.101781	0.0470085
																								Ncoa5	1.86112	0.0181991	1	0.127226	0.0683761
																								Umad1	1.48674	0.0182041	1	0.251908	0.175214
																								Pld3	1.22468	0.0182108	1	0.437659	0.324786
																								1110065P20Rik	1.3717	0.0182288	1	0.300254	0.209402
																								Hcfc1	1.83299	0.0182845	1	0.167939	0.102564
																								Nsun2	1.38762	0.0182999	1	0.282443	0.196581
																								Usp7	1.31881	0.0183108	1	0.272265	0.179487
																								Pithd1	1.55373	0.018355	1	0.236641	0.162393
																								Ppox	1.53433	0.0184337	1	0.195929	0.119658
																								Nudt2	1.28867	0.0184587	1	0.394402	0.282051
																								St7l	1.51357	0.01847	1	0.185751	0.111111
																								Wdr91	1.40939	0.0184807	1	0.246819	0.162393
																								Ppp2r3c	1.70947	0.0185158	1	0.129771	0.0683761
																								Sacm1l	1.30942	0.0185231	1	0.323155	0.226496
																								Acadl	0.915361	0.0185272	1	0.788804	0.790598
																								Hsp90aa1	1.16162	0.0185414	1	0.78117	0.653846
																								Rap1a	1.31273	0.0185737	1	0.361323	0.260684
																								Map4k5	1.66298	0.0186369	1	0.152672	0.0897436
																								mt-Nd3	1.26942	0.0186486	1	0.519084	0.401709
																								Smek1	1.4058	0.0186732	1	0.21883	0.136752
																								Rapgef3	1.52541	0.0187525	1	0.19084	0.115385
																								Ggps1	1.48232	0.018775	1	0.178117	0.106838
																								Lrrc59	1.95784	0.0188065	1	0.132316	0.0726496
																								Sesn1	1.51278	0.0188119	1	0.178117	0.106838
																								Abi2	1.51232	0.0188357	1	0.208651	0.132479
																								Fem1c	1.55868	0.0188397	1	0.236641	0.15812
																								Arl2bp	1.21806	0.0188659	1	0.26972	0.175214
																								Glyr1	1.2564	0.0189433	1	0.374046	0.273504
																								Psma7	1.15507	0.0190075	1	0.814249	0.683761
																								Ccdc124	1.26371	0.0190701	1	0.498728	0.401709
																								Kras	1.58829	0.0190719	1	0.178117	0.106838
																								Fam136a	1.29489	0.0190922	1	0.307888	0.217949
																								Gpatch2l	1.56136	0.0191009	1	0.170483	0.102564
																								Pum2	1.39831	0.0191316	1	0.330789	0.24359
																								Dync1i2	1.25834	0.0191369	1	0.379135	0.264957
																								Taco1	1.5934	0.0191672	1	0.183206	0.111111
																								Med21	1.37155	0.0191804	1	0.3257	0.235043
																								Taf6l	1.23901	0.0192016	1	0.452926	0.333333
																								Tomm6	1.42622	0.0192036	1	0.302799	0.222222
																								Tmem123	1.25897	0.0192309	1	0.356234	0.252137
																								Pcgf2	1.50985	0.0192592	1	0.249364	0.17094
																								Triobp	1.89944	0.0192761	1	0.127226	0.0683761
																								Rnf126	1.66974	0.0193248	1	0.160305	0.0940171
																								3110040N11Rik	1.40229	0.0193276	1	0.244275	0.15812
																								Rif1	1.54201	0.0193532	1	0.183206	0.111111
																								Deb1	1.25966	0.0193749	1	0.458015	0.34188
																								Gps2	1.39926	0.0194048	1	0.305344	0.213675
																								Nlk	2.18871	0.0194401	1	0.119593	0.0641026
																								Fam160b1	1.9259	0.019457	1	0.114504	0.0598291
																								Ncl	1.2129	0.019461	1	0.62341	0.525641
																								Elf2	1.3474	0.0194639	1	0.249364	0.162393
																								Ccar2	1.72466	0.0194711	1	0.145038	0.0811966
																								Capza1	1.43951	0.019474	1	0.256997	0.175214
																								Atp13a2	1.49157	0.0194764	1	0.147583	0.0811966
																								Gal3st1	1.18571	0.0195109	1	0.338422	0.226496
																								Idh3a	0.893632	0.0195289	1	0.745547	0.688034
																								Cd164	1.22462	0.0195898	1	0.470738	0.354701
																								Tcf12	1.67037	0.0195923	1	0.10687	0.0512821
																								Thap11	1.4613	0.0196163	1	0.221374	0.141026
																								Cd59a	0.842593	0.0196493	1	0.633588	0.65812
																								Golga5	1.44057	0.0196849	1	0.251908	0.166667
																								Parl	1.31558	0.0197027	1	0.346056	0.247863
																								Raph1	2.01287	0.0197263	1	0.117048	0.0598291
																								Phpt1	1.21564	0.019807	1	0.597964	0.474359
																								Rbm20	1.8799	0.0198355	1	0.122137	0.0641026
																								Wapl	1.4128	0.0198653	1	0.223919	0.145299
																								Cish	1.25561	0.0198835	1	0.35369	0.247863
																								Rpl12	1.15985	0.0200805	1	0.75827	0.649573
																								Uckl1	1.49202	0.0201647	1	0.256997	0.175214
																								Rbm47	1.20002	0.0201985	1	0.692112	0.568376
																								Atp2b1	1.38878	0.0202618	1	0.282443	0.200855
																								Arhgap5	1.22979	0.0202631	1	0.470738	0.350427
																								Cd200	1.76576	0.0202941	1	0.185751	0.119658
																								Golph3l	1.41987	0.0203223	1	0.195929	0.119658
																								Mthfsl	1.37277	0.0203386	1	0.320611	0.235043
																								Itga1	1.31268	0.0203437	1	0.310433	0.213675
																								Cfdp1	1.24824	0.0203497	1	0.442748	0.337607
																								Agrn	1.50196	0.0203593	1	0.193384	0.119658
																								Tmem183a	1.38468	0.0204235	1	0.284987	0.196581
																								Syne2	1.18366	0.0204366	1	0.610687	0.470085
																								Smc5	1.61458	0.020443	1	0.117048	0.0598291
																								Prkar1a	1.16723	0.0204833	1	0.722646	0.594017
																								Cebpa	1.55075	0.020499	1	0.145038	0.0811966
																								Ralgapa1	1.46033	0.0205027	1	0.183206	0.111111
																								Trappc8	1.95406	0.0205114	1	0.114504	0.0598291
																								Coq10a	1.83075	0.0205243	1	0.132316	0.0726496
																								Gatad2b	1.34647	0.0205431	1	0.305344	0.217949
																								Rdh13	1.89733	0.0205701	1	0.132316	0.0726496
																								Mzt1	1.24797	0.020592	1	0.371501	0.269231
																								Rsf1	1.51048	0.0206143	1	0.24173	0.15812
																								Mkrn1	1.33751	0.0206343	1	0.374046	0.282051
																								Gnl3	1.75477	0.0206353	1	0.122137	0.0641026
																								Ctnnd1	1.4526	0.0206623	1	0.188295	0.115385
																								Greb1	1.4968	0.0206887	1	0.211196	0.136752
																								Abce1	1.39751	0.0207142	1	0.239186	0.15812
																								Dicer1	1.63432	0.0207418	1	0.155216	0.0897436
																								Il17re	1.30876	0.0207636	1	0.384224	0.286325
																								St5	1.37224	0.0207669	1	0.272265	0.192308
																								Spata7	2.11532	0.0208556	1	0.104326	0.0512821
[truncated: 715 more rows]
[truncated: 40 more columns]
