# Supplementary material for: Analysis of potential biomarkers for diabetic kidney disease based on single-cell RNA-sequencing integrated with a single-cell sequencing assay for transposase-accessible chromatin
Source: Aging (Albany NY). 2023 Oct 11;15(19):10681–704. doi: 10.18632/aging.205107 (PMC10599739; doi:10.18632/aging.205107)
Supplement: Supplementary Table 5 [file aging-15-205107-s006.xlsx]

## Sheet: Supplementary Table 5-Cell type
Supplementary Table 5. Cell type specific accessible open chromatin peaks.
id	seqnames	idx	start	end
B cell	chr18	4451	60803488	60803988
B cell	chr7	17	3290116	3290616
B cell	chr17	4062	34293516	34294016
B cell	chr17	7835	73246887	73247387
B cell	chr17	4007	34144820	34145320
B cell	chr5	975	23386809	23387309
B cell	chr17	9573	88113345	88113845
B cell	chr17	4092	34347626	34348126
B cell	chr11	11171	99168055	99168555
B cell	chr8	1834	25067923	25068423
B cell	chr17	538	6816181	6816681
B cell	chr8	6303	84198292	84198792
B cell	chr18	6705	80611880	80612380
B cell	chr14	8790	121366009	121366509
B cell	chr13	3532	43765202	43765702
B cell	chr10	9367	96370970	96371470
B cell	chr3	831	19430080	19430580
B cell	chr3	7107	101287784	101288284
B cell	chr16	3051	30678746	30679246
B cell	chr9	3053	44526218	44526718
B cell	chr1	9044	128607974	128608474
B cell	chr1	3198	54585306	54585806
B cell	chr1	9577	132341695	132342195
B cell	chr19	5371	44376491	44376991
B cell	chr12	5462	82225694	82226194
B cell	chr2	15322	163602430	163602930
B cell	chr13	7181	83571921	83572421
B cell	chr19	5375	44382839	44383339
B cell	chr17	6240	52162554	52163054
B cell	chr1	6381	87650614	87651114
B cell	chr17	4005	34142961	34143461
B cell	chr4	10713	134097201	134097701
B cell	chr8	6201	83748631	83749131
B cell	chr7	1078	19321394	19321894
B cell	chr14	2610	33185274	33185774
B cell	chr15	4135	64075617	64076117
B cell	chr4	14421	155200677	155201177
B cell	chr17	4067	34301067	34301567
B cell	chr1	5990	85703536	85704036
B cell	chr17	4070	34305548	34306048
B cell	chr5	10569	123128458	123128958
B cell	chr1	9048	128614702	128615202
B cell	chr13	9756	112001023	112001523
B cell	chr13	1609	24604597	24605097
B cell	chr13	18	3526277	3526777
B cell	chr9	1892	32652187	32652687
B cell	chr5	7026	99336407	99336907
B cell	chr12	5069	79646461	79646961
B cell	chr5	13409	144283650	144284150
B cell	chr17	4069	34304619	34305119
B cell	chr1	14499	180199308	180199808
B cell	chr11	12187	104636961	104637461
B cell	chr17	4038	34257504	34258004
B cell	chr12	8422	111159886	111160386
B cell	chr13	523	9759901	9760401
B cell	chr2	3058	31082714	31083214
B cell	chr17	4040	34261487	34261987
B cell	chr18	6870	82525780	82526280
B cell	chr8	551	11106955	11107455
B cell	chr7	2229	28982550	28983050
B cell	chr6	3190	48732899	48733399
B cell	chr8	10435	122547687	122548187
B cell	chr3	10141	135191796	135192296
B cell	chr8	549	11098418	11098918
B cell	chr16	3979	36711725	36712225
B cell	chr11	9391	87749393	87749893
B cell	chr10	11298	121420002	121420502
B cell	chr11	3426	44950310	44950810
B cell	chr13	7192	83609097	83609597
B cell	chr1	6369	87626315	87626815
B cell	chr14	3991	54227207	54227707
B cell	chr7	3575	44534106	44534606
B cell	chr11	27	3332190	3332690
B cell	chr3	4773	84039008	84039508
B cell	chr2	5322	58156897	58157397
B cell	chr8	8178	105623002	105623502
B cell	chr5	10296	122220270	122220770
B cell	chr19	6319	53424657	53425157
B cell	chr10	6654	78092634	78093134
B cell	chr3	8464	115729164	115729664
B cell	chr16	2266	23279770	23280270
B cell	chr19	1276	8019902	8020402
B cell	chr18	4454	60805694	60806194
B cell	chr17	4059	34287660	34288160
B cell	chr8	5053	70865348	70865848
B cell	chr1	2052	38902453	38902953
B cell	chr17	9583	88175851	88176351
B cell	chr16	3565	33751517	33752017
B cell	chr19	6867	57118720	57119220
B cell	chr1	3119	53791253	53791753
B cell	chr1	3347	55215383	55215883
B cell	chr13	2067	30761262	30761762
B cell	chr13	4676	52572423	52572923
B cell	chr7	2035	28380921	28381421
B cell	chr8	1083	13600216	13600716
B cell	chr11	11164	99154948	99155448
B cell	chr15	4005	62169596	62170096
B cell	chr13	1388	23570978	23571478
B cell	chr16	7826	95728771	95729271
B cell	chr13	9727	111935867	111936367
B cell	chr17	9243	86337070	86337570
B cell	chr15	4009	62181432	62181932
B cell	chr15	8078	97469540	97470040
B cell	chr4	1107	21755092	21755592
B cell	chr11	12018	103413088	103413588
B cell	chr8	8268	106052418	106052918
B cell	chr2	15327	163642717	163643217
B cell	chr5	10223	121833711	121834211
B cell	chr5	11288	129077191	129077691
B cell	chr4	9757	129575134	129575634
B cell	chr16	2905	30039166	30039666
B cell	chr2	14885	158666336	158666836
B cell	chr13	695	12561683	12562183
B cell	chr11	9396	87755222	87755722
B cell	chr15	7241	86182541	86183041
B cell	chr2	1386	18988709	18989209
B cell	chr6	9751	120567433	120567933
B cell	chr1	15099	183979669	183980169
B cell	chr2	11674	128008624	128009124
B cell	chr14	3057	40999783	41000283
B cell	chr17	4372	35259018	35259518
B cell	chr13	1612	24613377	24613877
B cell	chr4	433	9630454	9630954
B cell	chr2	9426	103895047	103895547
B cell	chr10	4517	60168303	60168803
B cell	chr13	8704	101659074	101659574
B cell	chr17	4060	34291519	34292019
B cell	chr10	4944	62543371	62543871
B cell	chr11	12820	109419824	109420324
B cell	chr10	3375	42860325	42860825
B cell	chr7	11460	127090980	127091480
B cell	chr17	633	8195510	8196010
B cell	chr19	3605	29486410	29486910
B cell	chr5	7187	100585129	100585629
B cell	chr7	5970	75589170	75589670
B cell	chr1	8904	127514430	127514930
B cell	chr3	2702	52000009	52000509
B cell	chr4	7356	108310795	108311295
B cell	chr3	2792	52443885	52444385
B cell	chr1	12153	160047507	160048007
B cell	chr17	9560	88042398	88042898
B cell	chr18	2330	35854350	35854850
B cell	chr14	5893	69774787	69775287
B cell	chr7	3591	44572243	44572743
B cell	chr14	1926	27405398	27405898
B cell	chr1	16076	193201337	193201837
B cell	chr14	5946	70069163	70069663
B cell	chr11	8739	83746055	83746555
B cell	chr15	6493	82218714	82219214
B cell	chr19	7198	60284883	60285383
B cell	chr15	811	12014071	12014571
B cell	chr17	7843	73273780	73274280
B cell	chr7	11121	125541793	125542293
B cell	chr9	10665	115488980	115489480
B cell	chr1	15728	191193554	191194054
B cell	chr2	2959	30711941	30712441
B cell	chr4	3361	53345316	53345816
B cell	chr3	2784	52396212	52396712
B cell	chr4	2515	44704307	44704807
B cell	chr8	1851	25102856	25103356
B cell	chr8	3270	45899719	45900219
B cell	chr9	3191	44986406	44986906
B cell	chr19	4863	41328688	41329188
B cell	chr19	6075	47887961	47888461
B cell	chr2	17087	174613889	174614389
B cell	chr4	9629	129033000	129033500
B cell	chr8	6862	88668377	88668877
B cell	chr13	2961	38503443	38503943
B cell	chr9	9417	106222271	106222771
B cell	chr14	523	16173246	16173746
B cell	chr2	16028	167081702	167082202
B cell	chr14	3994	54231042	54231542
B cell	chr13	7156	83066029	83066529
B cell	chr10	1342	19062175	19062675
B cell	chr6	11078	129284322	129284822
B cell	chr19	4875	41344915	41345415
B cell	chr13	9754	111999556	112000056
B cell	chr2	104	3726685	3727185
B cell	chr10	7025	80075228	80075728
B cell	chr11	10937	98457705	98458205
B cell	chr9	5848	65535153	65535653
B cell	chr19	1938	12457297	12457797
B cell	chr3	8764	121369548	121370048
B cell	chr18	5133	65416146	65416646
B cell	chr3	3313	58516600	58517100
B cell	chr5	7408	102497158	102497658
B cell	chr4	7644	111442316	111442816
B cell	chr12	905	16383433	16383933
B cell	chr2	5327	58160875	58161375
B cell	chr13	5503	58551897	58552397
B cell	chr19	6325	53441482	53441982
B cell	chr5	13729	147340924	147341424
B cell	chr9	2600	42028731	42029231
B cell	chr9	4153	53706191	53706691
B cell	chr15	808	12010177	12010677
B cell	chr10	10928	118103119	118103619
B cell	chr16	779	11077494	11077994
B cell	chr10	7267	80695091	80695591
B cell	chr5	4552	65955772	65956272
B cell	chr11	14297	118145695	118146195
B cell	chr7	10253	117428879	117429379
B cell	chr17	5875	48300128	48300628
B cell	chr7	11285	126416588	126417088
B cell	chr13	1386	23562167	23562667
B cell	chr10	2791	39412712	39413212
B cell	chr13	2275	32934962	32935462
B cell	chr4	11202	135899949	135900449
B cell	chr1	13486	170928467	170928967
B cell	chr10	6651	78087034	78087534
B cell	chr4	12882	145240602	145241102
B cell	chr5	5683	77289574	77290074
B cell	chr5	9737	118478160	118478660
B cell	chr11	3386	44574760	44575260
B cell	chr8	1857	25118887	25119387
B cell	chr1	2927	52008341	52008841
B cell	chr4	5859	95215052	95215552
B cell	chr6	6384	87152866	87153366
B cell	chr1	14836	181860586	181861086
B cell	chr9	11188	119982278	119982778
B cell	chr17	8901	84119540	84120040
B cell	chr16	5177	52418287	52418787
B cell	chr17	4063	34295943	34296443
B cell	chr9	1885	32617343	32617843
B cell	chr11	3693	48787724	48788224
B cell	chr3	3912	67557093	67557593
B cell	chr7	11258	126285210	126285710
B cell	chr19	6876	57132289	57132789
B cell	chr6	10696	127236484	127236984
B cell	chr12	6258	86833629	86834129
B cell	chr4	11191	135876520	135877020
B cell	chr15	7635	91634145	91634645
B cell	chr4	11296	136180395	136180895
B cell	chr15	5043	74962549	74963049
B cell	chr9	3651	48558591	48559091
B cell	chr6	12674	145306664	145307164
B cell	chr7	621	16055553	16056053
B cell	chr15	1349	27596707	27597207
B cell	chr15	3943	61540812	61541312
B cell	chr5	5854	86078742	86079242
B cell	chr17	4373	35262667	35263167
B cell	chr19	1794	11266027	11266527
B cell	chr3	3314	58517158	58517658
B cell	chr4	7627	111399718	111400218
B cell	chr6	7737	99053057	99053557
B cell	chr9	10667	115499440	115499940
B cell	chr4	27	3648941	3649441
B cell	chr10	9573	98877754	98878254
B cell	chr2	4022	35495883	35496383
B cell	chr1	2029	38664788	38665288
B cell	chr7	1362	24442274	24442774
B cell	chr8	7909	104246989	104247489
B cell	chr12	8978	113228126	113228626
B cell	chr11	11917	103174904	103175404
B cell	chr2	10338	117328501	117329001
B cell	chr17	4041	34262911	34263411
B cell	chr10	1639	20518129	20518629
B cell	chr2	11547	127335223	127335723
B cell	chr7	1364	24445475	24445975
B cell	chr8	9174	114803138	114803638
B cell	chr17	5774	47768611	47769111
B cell	chr1	13613	171390065	171390565
B cell	chr13	8706	101663941	101664441
B cell	chr6	11072	129273637	129274137
B cell	chr11	4673	54807659	54808159
B cell	chr6	12685	145339807	145340307
B cell	chr19	4865	41332158	41332658
B cell	chr7	8467	100495725	100496225
B cell	chr18	3608	49772443	49772943
B cell	chr6	11059	129232780	129233280
B cell	chr1	1666	36281817	36282317
B cell	chr2	4801	49417003	49417503
B cell	chr5	14073	149245897	149246397
B cell	chr11	14333	118211764	118212264
B cell	chr6	12890	146675035	146675535
B cell	chr5	6845	96979998	96980498
B cell	chr10	10735	117434765	117435265
B cell	chr18	4456	60807239	60807739
B cell	chr11	13235	114185458	114185958
B cell	chr12	6123	85979939	85980439
B cell	chr17	3363	31075446	31075946
B cell	chr3	10833	143674379	143674879
B cell	chr8	10754	123953727	123954227
B cell	chr19	1296	8518232	8518732
B cell	chr9	3263	45246037	45246537
B cell	chr11	12147	104424926	104425426
B cell	chr18	4447	60791885	60792385
B cell	chr5	10013	120693847	120694347
B cell	chr11	2937	34782970	34783470
B cell	chr10	7890	84815970	84816470
B cell	chr13	9759	112004069	112004569
B cell	chrX	2487	101268034	101268534
B cell	chr2	80	3657849	3658349
B cell	chr3	7739	105892425	105892925
B cell	chr18	5117	65312239	65312739
B cell	chr2	7697	79254510	79255010
B cell	chr4	9214	125124679	125125179
B cell	chr11	3394	44616976	44617476
B cell	chr11	3411	44765002	44765502
B cell	chr5	4540	65929079	65929579
B cell	chr10	899	13964907	13965407
B cell	chr15	8156	97824985	97825485
B cell	chr1	14675	180829744	180830244
B cell	chr10	4523	60189669	60190169
B cell	chr13	8576	100575906	100576406
B cell	chr7	1469	24897107	24897607
B cell	chr17	3017	29394083	29394583
B cell	chr15	8949	101266550	101267050
B cell	chr14	5553	66199630	66200130
B cell	chr15	8388	98953358	98953858
B cell	chr17	6065	50180904	50181404
B cell	chr9	122	7742686	7743186
B cell	chr10	6190	75446370	75446870
B cell	chr8	1080	13594752	13595252
B cell	chr9	163	7872652	7873152
B cell	chr1	9918	134063034	134063534
B cell	chr10	2792	39413299	39413799
B cell	chr2	13637	150673867	150674367
B cell	chr3	10443	137981293	137981793
B cell	chr16	5578	58498358	58498858
B cell	chr7	1246	19817328	19817828
B cell	chr9	2647	42141783	42142283
B cell	chr13	2072	30786030	30786530
B cell	chr7	7232	88277747	88278247
B cell	chr8	11038	125558580	125559080
B cell	chr9	1831	32394638	32395138
B cell	chr4	3351	53277944	53278444
B cell	chr9	6944	74965043	74965543
B cell	chr16	3279	32163348	32163848
B cell	chr8	8270	106054130	106054630
B cell	chr12	7681	104990675	104991175
B cell	chr19	6425	53870013	53870513
B cell	chr5	4968	68735111	68735611
B cell	chr11	8412	80508446	80508946
B cell	chr7	11259	126285736	126286236
B cell	chr13	3546	43788861	43789361
B cell	chr16	2512	24629201	24629701
B cell	chr10	896	13946385	13946885
B cell	chr4	9628	129032104	129032604
B cell	chr1	14576	180401708	180402208
B cell	chr18	4485	60830932	60831432
B cell	chr8	8323	106338779	106339279
B cell	chr13	1391	23574062	23574562
B cell	chr9	3071	44570901	44571401
B cell	chr17	9584	88190747	88191247
B cell	chr2	15982	166875450	166875950
B cell	chr5	5857	86086742	86087242
B cell	chr2	11548	127335752	127336252
B cell	chr19	1975	12573151	12573651
B cell	chr11	8736	83737232	83737732
B cell	chr15	9411	103453449	103453949
B cell	chr3	5414	88521706	88522206
B cell	chr18	4453	60804803	60805303
B cell	chr12	7336	102451353	102451853
B cell	chr4	2537	44905531	44906031
B cell	chr6	1739	31233248	31233748
B cell	chr6	3172	48692908	48693408
B cell	chr7	11261	126288643	126289143
B cell	chr9	4776	58510492	58510992
B cell	chr3	10831	143646794	143647294
B cell	chr4	4757	71291695	71292195
B cell	chr11	12493	106762486	106762986
B cell	chr5	6922	98016792	98017292
B cell	chr9	1883	32612785	32613285
B cell	chr1	7511	97659304	97659804
B cell	chr13	4623	52083990	52084490
B cell	chr8	4913	70618851	70619351
B cell	chr9	5710	64789217	64789717
B cell	chr19	344	4300262	4300762
B cell	chr19	6317	53423215	53423715
B cell	chr4	13635	150566086	150566586
B cell	chr2	8968	101732635	101733135
B cell	chr18	1659	25590734	25591234
B cell	chr3	11346	148695379	148695879
B cell	chr2	7698	79255126	79255626
B cell	chr5	2737	37067108	37067608
B cell	chr9	3067	44567508	44568008
B cell	chr13	3431	43209520	43210020
B cell	chr17	9571	88111690	88112190
B cell	chr11	14304	118156341	118156841
B cell	chr8	2607	34732301	34732801
B cell	chr13	2258	32831856	32832356
B cell	chr13	2719	37345096	37345596
B cell	chr18	6094	75286981	75287481
B cell	chr2	17101	174880590	174881090
B cell	chr3	5297	88148242	88148742
B cell	chr3	11443	149326630	149327130
B cell	chr2	8672	93187297	93187797
B cell	chr1	4286	64925642	64926142
B cell	chr6	8446	108549520	108550020
B cell	chr1	6403	87828251	87828751
B cell	chr17	9572	88112242	88112742
B cell	chr18	2901	39020766	39021266
B cell	chr7	1369	24457553	24458053
B cell	chr10	1856	22306405	22306905
B cell	chr7	2618	30887501	30888001
B cell	chr8	1830	25051852	25052352
B cell	chr9	4752	58271053	58271553
B cell	chr1	14606	180541258	180541758
B cell	chr4	2973	47251066	47251566
B cell	chr6	4908	70743845	70744345
B cell	chr16	5581	58501930	58502430
B cell	chr5	7874	105718181	105718681
B cell	chr9	1996	33483135	33483635
B cell	chr18	5291	67248763	67249263
B cell	chr13	7144	82915153	82915653
B cell	chr8	9231	115397963	115398463
B cell	chr11	4117	51644161	51644661
B cell	chr3	8446	115682612	115683112
B cell	chr12	5099	79840436	79840936
B cell	chr12	5761	84243083	84243583
B cell	chr13	3533	43767610	43768110
B cell	chr16	1677	19152470	19152970
B cell	chr17	7837	73250493	73250993
B cell	chr17	7841	73263036	73263536
B cell	chr19	4480	37502997	37503497
B cell	chr2	17100	174871171	174871671
B cell	chr7	8053	98488246	98488746
B cell	chr1	7806	106162460	106162960
B cell	chr3	5408	88509925	88510425
B cell	chr1	3140	53851324	53851824
B cell	chr2	1904	25196489	25196989
B cell	chr6	11830	136689972	136690472
B cell	chr10	10694	117216023	117216523
B cell	chr15	1616	31279551	31280051
B cell	chr17	374	5804272	5804772
B cell	chr19	3077	25052250	25052750
B cell	chr7	8529	100855730	100856230
B cell	chr11	11086	98943156	98943656
B cell	chr4	10655	133841020	133841520
B cell	chrX	1822	74243672	74244172
B cell	chr2	16087	167368280	167368780
B cell	chr1	11621	155059519	155060019
B cell	chr10	10297	111471071	111471571
B cell	chr16	3562	33745382	33745882
B cell	chr14	5845	68918513	68919013
B cell	chr14	3996	54233215	54233715
B cell	chr7	6403	80143315	80143815
B cell	chr11	7508	75654396	75654896
B cell	chr15	4522	67174424	67174924
B cell	chr6	6449	87552295	87552795
B cell	chr18	4487	60843718	60844218
B cell	chr17	4034	34239579	34240079
B cell	chr9	8038	89842486	89842986
B cell	chr16	7489	93816381	93816881
B cell	chr11	2692	32542637	32543137
B cell	chr13	9749	111983944	111984444
B cell	chr15	3935	61441751	61442251
B cell	chr3	7097	101270783	101271283
B cell	chr7	11850	128633101	128633601
B cell	chr8	5011	70768165	70768665
B cell	chr2	8675	93192532	93193032
B cell	chr8	5265	72183722	72184222
B cell	chr11	9395	87754477	87754977
B cell	chr9	4890	59656192	59656692
B cell	chr5	2636	36563061	36563561
B cell	chr3	10083	133583042	133583542
B cell	chr8	6847	88637496	88637996
B cell	chr8	6488	84985780	84986280
B cell	chr14	5936	70056922	70057422
B cell	chr19	1836	11494468	11494968
B cell	chr5	14032	149017596	149018096
B cell	chr7	9326	110241929	110242429
B cell	chr11	3596	46399001	46399501
B cell	chr16	1662	19007260	19007760
B cell	chr5	6923	98018064	98018564
B cell	chr17	4347	35218478	35218978
B cell	chr11	235	4195484	4195984
B cell	chr10	3038	40476866	40477366
B cell	chr14	2400	31416480	31416980
B cell	chr1	9940	134092828	134093328
B cell	chr4	8834	121196156	121196656
B cell	chr9	9143	103449056	103449556
B cell	chr19	2679	21583582	21584082
B cell	chr6	395	8485669	8486169
B cell	chr1	5350	75524696	75525196
B cell	chr17	3357	31066973	31067473
B cell	chr8	5290	72273828	72274328
B cell	chr2	6694	71032297	71032797
B cell	chr12	7769	105597160	105597660
B cell	chr6	5135	72140307	72140807
B cell	chr7	2133	28788727	28789227
B cell	chr1	11969	157017543	157018043
B cell	chr1	15871	191756471	191756971
B cell	chr2	9166	102795060	102795560
B cell	chr2	15334	163662651	163663151
B cell	chr9	2525	41105238	41105738
B cell	chr5	8643	112287160	112287660
B cell	chr7	8673	101377826	101378326
B cell	chr4	10027	130915655	130916155
B cell	chr10	10912	118082967	118083467
B cell	chr17	6653	56957997	56958497
B cell	chr8	9712	119423625	119424125
B cell	chr8	9810	119784109	119784609
B cell	chr13	9855	112398027	112398527
B cell	chr5	14239	150621489	150621989
B cell	chr4	945	16159507	16160007
B cell	chr1	15874	191813275	191813775
B cell	chr12	718	12580576	12581076
B cell	chr3	4479	79568627	79569127
B cell	chr12	914	16526117	16526617
B cell	chr7	4058	46606943	46607443
B cell	chr1	13611	171388660	171389160
B cell	chr11	2015	23771129	23771629
B cell	chr13	4304	49309072	49309572
B cell	chr2	5251	57238667	57239167
B cell	chr17	6066	50182467	50182967
B cell	chr11	1866	22782701	22783201
B cell	chr7	6438	80209630	80210130
B cell	chr2	13544	148763982	148764482
B cell	chr9	10768	116216627	116217127
B cell	chr6	9643	120082889	120083389
B cell	chr10	4083	54040264	54040764
B cell	chr2	15543	164868447	164868947
B cell	chr8	3467	46844860	46845360
B cell	chr15	8118	97742054	97742554
B cell	chr18	2354	35919454	35919954
B cell	chr9	6792	72660084	72660584
B cell	chr7	4153	47022403	47022903
B cell	chr2	8259	90649965	90650465
B cell	chr10	7068	80159689	80160189
B cell	chr14	119	8114281	8114781
B cell	chr1	14085	176732758	176733258
B cell	chr10	2112	25366633	25367133
B cell	chr17	4066	34299337	34299837
B cell	chr5	9132	114864774	114865274
B cell	chr7	3374	43392369	43392869
B cell	chr9	5191	61679634	61680134
B cell	chr16	7370	92825930	92826430
B cell	chr14	8940	121938572	121939072
B cell	chr17	3548	31790672	31791172
B cell	chr2	3902	34963525	34964025
B cell	chr1	9306	131199955	131200455
B cell	chr10	4515	60162361	60162861
B cell	chr17	5537	46751368	46751868
B cell	chr10	5949	71246846	71247346
B cell	chr2	5674	60172498	60172998
B cell	chr1	6411	87847155	87847655
B cell	chr9	11690	123480461	123480961
B cell	chr16	4499	43698869	43699369
B cell	chr4	4023	59331615	59332115
B cell	chr4	10783	134362548	134363048
B cell	chr14	5943	70065800	70066300
B cell	chr9	11595	122785158	122785658
B cell	chr7	1031	19265842	19266342
B cell	chr17	6485	56266237	56266737
B cell	chr5	8152	107932467	107932967
B cell	chr3	9325	126696545	126697045
B cell	chr1	6166	86441352	86441852
B cell	chr10	4587	60351738	60352238
B cell	chr9	4627	57640359	57640859
B cell	chr10	3105	41385400	41385900
B cell	chr2	16732	172400976	172401476
B cell	chr13	2470	34683698	34684198
B cell	chr2	10512	118554240	118554740
B cell	chr10	6134	75222650	75223150
B cell	chr12	4765	76765245	76765745
B cell	chr2	13124	144231133	144231633
B cell	chr2	12345	132020901	132021401
B cell	chr1	9203	130850316	130850816
B cell	chr12	6915	99640358	99640858
B cell	chr18	5112	65302425	65302925
B cell	chr19	6318	53424040	53424540
B cell	chr3	9762	131019434	131019934
B cell	chr4	4140	59803320	59803820
B cell	chr9	1901	32679429	32679929
B cell	chr2	11551	127337922	127338422
B cell	chr3	10347	136742651	136743151
B cell	chr9	9188	103708408	103708908
B cell	chr11	2707	32565191	32565691
B cell	chr17	367	5798304	5798804
B cell	chr1	11333	152817259	152817759
B cell	chr7	1368	24451816	24452316
B cell	chr4	12839	145045622	145046122
B cell	chr9	3401	45944927	45945427
B cell	chr13	8820	102689647	102690147
B cell	chr15	3796	59652751	59653251
B cell	chr8	6846	88635927	88636427
B cell	chr15	4754	73140168	73140668
B cell	chr5	13851	148379420	148379920
B cell	chr5	2950	39637828	39638328
B cell	chr1	5119	74389929	74390429
B cell	chr4	3568	55823963	55824463
B cell	chr13	5142	55432308	55432808
B cell	chr11	14186	117799060	117799560
B cell	chr4	4027	59335998	59336498
B cell	chr3	4626	81925739	81926239
B cell	chr3	2841	52634324	52634824
B cell	chr17	604	7925680	7926180
B cell	chr9	4528	57148200	57148700
B cell	chr5	7047	99414249	99414749
B cell	chr12	6856	99380842	99381342
B cell	chr1	9192	130820550	130821050
B cell	chr10	7388	81161963	81162463
B cell	chr12	5124	80001550	80002050
B cell	chr13	4442	51397684	51398184
B cell	chr16	5153	52149357	52149857
B cell	chr19	2687	21630583	21631083
B cell	chr19	4787	40818757	40819257
B cell	chr2	5340	58184208	58184708
B cell	chr3	197	8983828	8984328
B cell	chr9	1897	32667984	32668484
B cell	chr6	400	8504621	8505121
B cell	chr10	7260	80681881	80682381
B cell	chr10	11224	120882192	120882692
B cell	chr13	3453	43268877	43269377
B cell	chr11	2513	31814637	31815137
B cell	chr15	7445	89131303	89131803
B cell	chr12	6122	85973535	85974035
B cell	chr6	10134	122872791	122873291
B cell	chr13	9708	111867658	111868158
B cell	chr8	10517	122870323	122870823
B cell	chr5	14181	150118305	150118805
B cell	chr11	11166	99162990	99163490
B cell	chr4	2100	41311045	41311545
B cell	chr4	10595	133625702	133626202
B cell	chr10	6963	79940723	79941223
B cell	chr5	13168	142905690	142906190
B cell	chr11	10830	97999136	97999636
B cell	chr15	6158	80634758	80635258
B cell	chr6	6430	87502764	87503264
B cell	chr11	12823	109425583	109426083
B cell	chr17	6058	50157323	50157823
B cell	chr2	17541	181693463	181693963
B cell	chr5	2946	39630794	39631294
B cell	chr4	9631	129035352	129035852
B cell	chr18	5131	65414706	65415206
B cell	chr19	1812	11387574	11388074
B cell	chr4	2520	44710605	44711105
B cell	chr1	9035	128590675	128591175
B cell	chr8	10110	120725162	120725662
B cell	chr7	13088	141096588	141097088
B cell	chr7	1522	25129485	25129985
B cell	chr4	2430	43973483	43973983
B cell	chr2	16819	173026786	173027286
B cell	chr18	3610	49777384	49777884
B cell	chr3	358	9754922	9755422
B cell	chr3	368	9826063	9826563
B cell	chr4	9741	129525274	129525774
B cell	chr18	3796	53177141	53177641
B cell	chr17	2655	28080456	28080956
B cell	chr1	6106	86258139	86258639
B cell	chr1	10918	150387487	150387987
B cell	chr15	8036	97259268	97259768
B cell	chr3	10375	137288532	137289032
B cell	chr4	2507	44670984	44671484
B cell	chr4	6837	105285384	105285884
B cell	chr5	6443	92279120	92279620
B cell	chr9	5031	60999069	60999569
B cell	chr19	1433	8984337	8984837
B cell	chr1	11978	157063692	157064192
B cell	chr6	4907	70735453	70735953
B cell	chr7	3790	45239102	45239602
B cell	chr13	341	6889365	6889865
B cell	chr5	10572	123132401	123132901
B cell	chr2	6679	70932731	70933231
B cell	chr17	9653	88581418	88581918
B cell	chr2	13122	144228512	144229012
B cell	chr16	4674	45389760	45390260
B cell	chr19	2159	15883000	15883500
B cell	chr3	7386	103206310	103206810
B cell	chr8	3498	46941245	46941745
B cell	chr17	4082	34325413	34325913
B cell	chr17	8087	75465359	75465859
B cell	chr5	4011	62778545	62779045
B cell	chr4	8642	119959260	119959760
B cell	chr2	1117	14631536	14632036
B cell	chr5	5667	77246193	77246693
B cell	chr1	2301	40262668	40263168
B cell	chr2	403	6256130	6256630
B cell	chr10	4933	62507674	62508174
B cell	chr11	4655	54733431	54733931
B cell	chr5	10299	122232001	122232501
B cell	chr2	3901	34962813	34963313
B cell	chr12	7475	103343419	103343919
B cell	chr10	2704	37338121	37338621
B cell	chr9	5050	61054317	61054817
B cell	chr4	243	6924569	6925069
B cell	chr5	6926	98033018	98033518
B cell	chrX	4167	167091796	167092296
B cell	chr7	12160	132323305	132323805
B cell	chr5	6659	93136843	93137343
B cell	chr9	1864	32539986	32540486
B cell	chr2	5317	58150035	58150535
B cell	chr10	6360	75949585	75950085
B cell	chr12	8860	112867213	112867713
B cell	chr19	3570	29364030	29364530
B cell	chr19	4874	41344367	41344867
B cell	chr2	6620	70558714	70559214
B cell	chr5	5214	73265399	73265899
B cell	chr9	6426	70079964	70080464
B cell	chr10	6249	75591498	75591998
B cell	chr1	10597	138614465	138614965
B cell	chr14	6531	75179189	75179689
B cell	chr17	8799	83846179	83846679
B cell	chr18	556	10918271	10918771
B cell	chr5	12908	140733302	140733802
B cell	chr15	4744	73117858	73118358
B cell	chr16	7962	96541045	96541545
B cell	chr13	4273	49242697	49243197
B cell	chr2	16846	173083689	173084189
B cell	chr5	12072	136198814	136199314
B cell	chr11	5093	58928160	58928660
B cell	chr2	6630	70614896	70615396
B cell	chr1	11975	157048395	157048895
B cell	chr8	6200	83747810	83748310
B cell	chr9	3982	51213313	51213813
B cell	chr1	14727	181016405	181016905
B cell	chr7	8928	104296686	104297186
B cell	chr11	13559	115717596	115718096
B cell	chr7	9337	110286048	110286548
B cell	chr11	14245	117952081	117952581
B cell	chr4	329	8709526	8710026
B cell	chr1	11643	155097877	155098377
B cell	chr17	4016	34171076	34171576
B cell	chr4	9815	129810874	129811374
B cell	chr7	3987	45921180	45921680
B cell	chr6	8466	108630655	108631155
B cell	chr18	1878	32397343	32397843
B cell	chr2	6686	70964758	70965258
B cell	chr6	683	15841533	15842033
B cell	chr2	4504	43727590	43728090
B cell	chr5	13175	142920677	142921177
B cell	chr15	7953	96640539	96641039
B cell	chr6	12896	146688814	146689314
B cell	chr3	817	19319026	19319526
B cell	chr7	2036	28381817	28382317
B cell	chr9	5722	64810624	64811124
B cell	chr5	7808	105519026	105519526
B cell	chr7	6083	76462609	76463109
B cell	chr13	3222	41487117	41487617
B cell	chr17	5447	46388200	46388700
B cell	chr18	5243	66471327	66471827
B cell	chr19	3805	32168055	32168555
B cell	chr6	8223	106760770	106761270
B cell	chr19	5981	47432340	47432840
B cell	chr16	653	10515894	10516394
B cell	chr19	6633	55768776	55769276
B cell	chr19	4870	41339195	41339695
B cell	chr12	2744	44240964	44241464
B cell	chr9	8068	90059842	90060342
B cell	chr15	3649	59059469	59059969
B cell	chr19	4478	37495185	37495685
B cell	chr15	8483	99341016	99341516
B cell	chr5	12963	140948081	140948581
B cell	chr10	3203	41962728	41963228
B cell	chr8	9580	117475780	117476280
B cell	chr5	13042	142375992	142376492
B cell	chr1	12156	160052913	160053413
B cell	chr1	11409	153414243	153414743
B cell	chr10	3316	42436719	42437219
B cell	chr8	1255	14997547	14998047
B cell	chr9	6453	70244107	70244607
B cell	chr10	8216	87107506	87108006
B cell	chr19	1834	11491725	11492225
B cell	chr2	1024	13558547	13559047
B cell	chr3	2842	52638815	52639315
B cell	chr10	7521	81499473	81499973
B cell	chr10	11731	126502308	126502808
B cell	chr9	396	13536604	13537104
B cell	chr11	8617	83224110	83224610
B cell	chr16	6335	84583298	84583798
B cell	chr8	5711	78623982	78624482
B cell	chr2	13483	148425697	148426197
B cell	chr5	2300	34538411	34538911
B cell	chr18	6704	80610967	80611467
B cell	chr14	3161	45155458	45155958
B cell	chr11	9388	87744959	87745459
B cell	chr2	413	6309376	6309876
B cell	chr6	12820	146271102	146271602
B cell	chr5	11226	127621088	127621588
B cell	chr11	2938	34783653	34784153
B cell	chr5	10747	123974429	123974929
B cell	chr1	12365	161766585	161767085
B cell	chr10	10755	117559890	117560390
B cell	chr10	10759	117598900	117599400
B cell	chr11	3417	44892855	44893355
B cell	chr14	8934	121929277	121929777
B cell	chr17	334	5601979	5602479
B cell	chr18	3887	53937275	53937775
B cell	chr19	1232	7487532	7488032
B cell	chr19	5987	47446922	47447422
B cell	chr2	6678	70930878	70931378
B cell	chr2	7775	79741878	79742378
B cell	chr3	5178	87487875	87488375
B cell	chr4	10457	133159041	133159541
B cell	chr6	10275	124732932	124733432
B cell	chr9	2644	42131275	42131775
B cell	chr12	6923	99795897	99796397
B cell	chr9	3076	44582326	44582826
B cell	chr3	573	14880199	14880699
B cell	chr9	11699	123509788	123510288
B cell	chr15	8121	97744773	97745273
B cell	chr7	13034	140941640	140942140
B cell	chr19	2703	21713530	21714030
B cell	chr12	4665	76318863	76319363
B cell	chr15	807	12008110	12008610
B cell	chr11	5118	58982738	58983238
B cell	chr6	10274	124729749	124730249
B cell	chr11	11444	101008053	101008553
B cell	chr2	11540	127314423	127314923
B cell	chr10	4534	60219883	60220383
B cell	chr2	3051	31061334	31061834
B cell	chr2	10684	119300072	119300572
B cell	chr11	1310	17008472	17008972
B cell	chr5	10913	124496808	124497308
B cell	chr6	11112	129434250	129434750
B cell	chr6	12682	145337463	145337963
B cell	chr2	4233	37765004	37765504
B cell	chr8	5286	72270523	72271023
B cell	chr9	11192	119988245	119988745
B cell	chr1	9064	128705167	128705667
B cell	chr4	10621	133706850	133707350
B cell	chr1	8692	125466515	125467015
B cell	chr1	15867	191724602	191725102
B cell	chr17	8692	83267439	83267939
B cell	chr2	17083	174602199	174602699
B cell	chr12	5066	79633404	79633904
B cell	chr1	15875	191814243	191814743
B cell	chr18	4462	60812345	60812845
B cell	chr13	1573	24415428	24415928
B cell	chr9	6738	72099826	72100326
B cell	chr15	7237	86173586	86174086
B cell	chr6	7736	99050706	99051206
B cell	chr2	5321	58156318	58156818
B cell	chr16	1679	19179162	19179662
B cell	chr1	10514	138248008	138248508
B cell	chr4	2308	43454380	43454880
B cell	chr10	9548	98776221	98776721
B cell	chr6	3183	48711560	48712060
B cell	chr5	4308	64662420	64662920
B cell	chr4	11257	136081572	136082072
B cell	chr15	8800	100706227	100706727
B cell	chr1	10504	138191914	138192414
B cell	chr7	12699	137576212	137576712
B cell	chr17	5873	48293403	48293903
B cell	chr19	2848	23323074	23323574
B cell	chr4	8472	118999562	119000062
B cell	chr1	5353	75565573	75566073
B cell	chr1	9086	128766898	128767398
B cell	chr1	14214	177667479	177667979
B cell	chr10	12201	128438886	128439386
B cell	chr13	7158	83069273	83069773
B cell	chr13	9840	112354942	112355442
B cell	chr14	3394	47165053	47165553
B cell	chr18	2987	39409574	39410074
B cell	chr2	9438	103944883	103945383
B cell	chr3	5167	87376158	87376658
B cell	chr5	7221	100680152	100680652
B cell	chr8	5936	80981629	80982129
B cell	chr8	9173	114801672	114802172
B cell	chr8	6309	84203291	84203791
B cell	chr16	7558	94245932	94246432
B cell	chr13	3575	43898464	43898964
B cell	chr5	7253	100871982	100872482
B cell	chr1	6364	87620051	87620551
B cell	chr18	4104	56468959	56469459
B cell	chr14	5969	70175161	70175661
B cell	chr6	12615	144902560	144903060
B cell	chr16	2502	24599730	24600230
B cell	chr2	6621	70559387	70559887
B cell	chr14	8969	122009413	122009913
B cell	chr9	984	21327919	21328419
B cell	chr11	12824	109431362	109431862
B cell	chr1	8479	120175012	120175512
B cell	chr13	3936	46043019	46043519
B cell	chr7	976	19084370	19084870
B cell	chr2	1601	22774045	22774545
B cell	chr16	3554	33714143	33714643
B cell	chr6	6504	87915916	87916416
B cell	chr9	5719	64797398	64797898
B cell	chr7	3526	44311842	44312342
B cell	chr6	2306	37617308	37617808
B cell	chr8	1084	13601154	13601654
B cell	chr12	3824	69447190	69447690
B cell	chr1	5480	78537491	78537991
B cell	chr16	5125	52060216	52060716
B cell	chr13	1119	20185113	20185613
B cell	chr10	3480	43578863	43579363
B cell	chr8	10447	122568204	122568704
B cell	chr2	7073	73455460	73455960
B cell	chr11	2954	35090889	35091389
B cell	chr9	5066	61222211	61222711
B cell	chr16	6123	76537850	76538350
B cell	chr9	1949	32747540	32748040
B cell	chr11	10939	98459114	98459614
B cell	chr13	4627	52099984	52100484
B cell	chr7	6378	80074761	80075261
B cell	chr4	10283	132592816	132593316
B cell	chr4	9816	129811392	129811892
B cell	chr1	9206	130864172	130864672
B cell	chr19	6085	47915145	47915645
B cell	chr16	3053	30686336	30686836
B cell	chr7	1356	24413565	24414065
B cell	chr1	14701	180922214	180922714
B cell	chr4	5627	88864501	88865001
B cell	chr11	12068	103952868	103953368
B cell	chr2	3284	31822769	31823269
B cell	chr12	6905	99610248	99610748
B cell	chr10	8751	93124211	93124711
B cell	chr10	7882	84774569	84775069
B cell	chr1	15085	183803410	183803910
B cell	chr1	580	14143841	14144341
B cell	chr3	8439	115644291	115644791
B cell	chr17	8781	83799609	83800109
B cell	chr17	373	5803611	5804111
B cell	chr3	7833	107038103	107038603
B cell	chr4	9558	128735258	128735758
B cell	chr4	12910	145300229	145300729
B cell	chr5	858	21411220	21411720
B cell	chr2	11112	122652362	122652862
B cell	chr17	6753	57346927	57347427
B cell	chr10	1439	19657362	19657862
B cell	chr11	10197	95328557	95329057
B cell	chr11	12363	106308080	106308580
B cell	chr17	647	8237959	8238459
B cell	chr19	4045	33119931	33120431
B cell	chr19	4893	41390779	41391279
B cell	chr3	9330	126751342	126751842
B cell	chr4	2910	46775871	46776371
B cell	chr4	3828	57867403	57867903
B cell	chr5	2620	36535270	36535770
B cell	chr5	2849	38211646	38212146
B cell	chr6	7346	94518035	94518535
B cell	chr7	10368	118294713	118295213
B cell	chr8	1856	25118013	25118513
B cell	chr8	4748	70160027	70160527
B cell	chr2	2706	29624184	29624684
B cell	chr19	4797	40962885	40963385
B cell	chr15	8654	100060791	100061291
B cell	chrX	372	12135029	12135529
B cell	chr3	7109	101292543	101293043
B cell	chr7	9308	110166174	110166674
B cell	chr9	10677	115611705	115612205
B cell	chr12	3818	69422759	69423259
B cell	chr12	3839	69475322	69475822
B cell	chr7	1666	25636321	25636821
B cell	chr19	5714	46466055	46466555
B cell	chr10	9034	94828439	94828939
B cell	chr7	4842	64011669	64012169
B cell	chr6	2624	39334078	39334578
B cell	chr13	8821	102693170	102693670
B cell	chr1	9676	133083185	133083685
B cell	chr4	8865	122853600	122854100
B cell	chr17	7486	70886561	70887061
B cell	chr12	4725	76552219	76552719
B cell	chr17	7641	71485719	71486219
B cell	chr15	95	3982715	3983215
B cell	chr6	11787	136497688	136498188
B cell	chr10	2696	37321120	37321620
B cell	chr2	7013	73053993	73054493
B cell	chr4	12893	145254385	145254885
B cell	chr10	7002	80024132	80024632
B cell	chr17	6227	51903915	51904415
B cell	chr10	6650	78086380	78086880
B cell	chr4	1149	22401953	22402453
B cell	chr9	1852	32507370	32507870
B cell	chr14	7900	103036972	103037472
B cell	chr18	4188	56907281	56907781
B cell	chr15	4008	62177650	62178150
B cell	chr18	7049	84385076	84385576
B cell	chr2	10879	120578245	120578745
B cell	chr5	7589	103744514	103745014
B cell	chr15	8940	101256773	101257273
B cell	chr10	9685	99268725	99269225
B cell	chr11	4447	53769721	53770221
B cell	chr1	7849	106321324	106321824
B cell	chr17	6732	57278834	57279334
B cell	chr19	4318	36375330	36375830
B cell	chr5	9228	115167367	115167867
B cell	chr2	8343	91096421	91096921
B cell	chr10	4942	62541517	62542017
B cell	chr11	3376	44529233	44529733
B cell	chr4	8501	119127151	119127651
B cell	chr9	4755	58274986	58275486
B cell	chr12	6916	99641390	99641890
B cell	chr9	1425	27023572	27024072
B cell	chr2	6993	73003103	73003603
B cell	chr16	4944	49839648	49840148
B cell	chr2	16093	167381532	167382032
B cell	chr11	4790	55136674	55137174
B cell	chr6	7724	99007444	99007944
B cell	chr9	9698	107629017	107629517
B cell	chr5	8502	111178434	111178934
B cell	chr10	7645	82964458	82964958
B cell	chr13	2574	35783548	35784048
B cell	chr1	9941	134093773	134094273
B cell	chr17	7017	64668433	64668933
B cell	chr1	9917	134060750	134061250
B cell	chr7	5743	73595160	73595660
B cell	chr8	1115	13686367	13686867
B cell	chr1	14608	180546080	180546580
B cell	chr9	1884	32615884	32616384
B cell	chr1	1124	24685567	24686067
B cell	chr1	3267	54914414	54914914
B cell	chr11	4674	54808160	54808660
B cell	chr14	6494	75018034	75018534
B cell	chr17	4058	34287101	34287601
B cell	chr17	8094	75518163	75518663
B cell	chr17	8450	80236827	80237327
B cell	chr3	7740	105892997	105893497
B cell	chr4	4015	59287087	59287587
B cell	chr5	11227	127624403	127624903
B cell	chr9	2648	42146337	42146837
B cell	chr5	4931	67822020	67822520
B cell	chr9	501	14244499	14244999
B cell	chr18	4807	62189246	62189746
B cell	chr12	3287	54998941	54999441
B cell	chr10	7855	84571089	84571589
B cell	chr6	3178	48700062	48700562
B cell	chr5	8564	111509071	111509571
B cell	chr2	17046	174327192	174327692
B cell	chr4	1457	32401402	32401902
B cell	chr13	1383	23554772	23555272
B cell	chr8	9459	117197935	117198435
B cell	chr13	758	13523759	13524259
B cell	chr3	7738	105891752	105892252
B cell	chr11	10736	97683967	97684467
B cell	chr1	16008	192753012	192753512
B cell	chr5	11647	134236729	134237229
B cell	chr9	3075	44581379	44581879
B cell	chr7	10214	116620291	116620791
B cell	chr6	9300	116679499	116679999
B cell	chr10	11143	120193193	120193693
B cell	chr2	8666	93162824	93163324
B cell	chr7	1479	24954404	24954904
B cell	chr17	9279	86467289	86467789
B cell	chr3	7098	101274794	101275294
B cell	chr7	5037	66194447	66194947
B cell	chr10	7641	82934951	82935451
B cell	chr6	5360	72954598	72955098
B cell	chr7	7453	90129205	90129705
B cell	chr7	10228	117376014	117376514
B cell	chr3	9045	122406354	122406854
B cell	chr8	5167	71596752	71597252
B cell	chr9	4346	55388052	55388552
B cell	chr1	8569	121461751	121462251
B cell	chr18	5114	65304682	65305182
B cell	chr19	2843	23246521	23247021
B cell	chr15	7945	96583202	96583702
B cell	chr18	2100	34856094	34856594
B cell	chr13	3541	43784897	43785397
B cell	chr1	14177	177467024	177467524
B cell	chr2	16273	167924913	167925413
B cell	chr1	9142	130474872	130475372
B cell	chr11	9126	86385527	86386027
B cell	chr16	3281	32165294	32165794
B cell	chr7	5016	66124636	66125136
B cell	chr1	14615	180587719	180588219
B cell	chr1	12136	159991835	159992335
B cell	chr13	1257	21716066	21716566
B cell	chr8	5262	72169124	72169624
B cell	chr4	373	8915521	8916021
B cell	chr14	8318	117625308	117625808
B cell	chr17	6031	50025033	50025533
B cell	chr18	4430	60744555	60745055
B cell	chr8	9237	115414075	115414575
B cell	chr5	10591	123151015	123151515
B cell	chr3	10299	136325806	136326306
B cell	chr3	11203	146257401	146257901
B cell	chr9	5723	64811147	64811647
B cell	chr7	215	4653709	4654209
B cell	chr1	7685	105274746	105275246
B cell	chr1	12337	161500045	161500545
B cell	chr11	9704	89079241	89079741
B cell	chr11	14680	119954972	119955472
B cell	chr14	4694	59438420	59438920
B cell	chr14	7879	102961909	102962409
B cell	chr16	7967	96624454	96624954
B cell	chr17	6064	50173361	50173861
B cell	chr19	193	3943230	3943730
B cell	chr19	4035	33042746	33043246
B cell	chr2	15983	166876292	166876792
B cell	chr2	17458	181188608	181189108
B cell	chr3	9766	131057204	131057704
B cell	chr4	8608	119663411	119663911
B cell	chr4	10319	132778806	132779306
B cell	chr5	7229	100725928	100726428
B cell	chr6	9654	120151575	120152075
B cell	chr6	9870	121063000	121063500
B cell	chr7	11150	125607727	125608227
B cell	chr8	10537	122937386	122937886
B cell	chr9	10666	115492301	115492801
B cell	chr17	8084	75442956	75443456
B cell	chr10	9369	96374498	96374998
B cell	chr8	8269	106052975	106053475
B cell	chr1	10478	138136363	138136863
B cell	chr19	5378	44388404	44388904
B cell	chr1	9037	128592075	128592575
B cell	chr17	2207	26167960	26168460
B cell	chr2	1605	22784135	22784635
B cell	chr18	6541	79035804	79036304
B cell	chr1	6938	91057595	91058095
B cell	chr16	1693	19761647	19762147
B cell	chr18	3607	49771171	49771671
B cell	chr4	706	11763241	11763741
B cell	chr8	10102	120701662	120702162
B cell	chr5	4024	62858247	62858747
B cell	chr11	3397	44624587	44625087
B cell	chr17	942	12118952	12119452
B cell	chr2	6581	70091101	70091601
B cell	chr8	6479	84978583	84979083
B cell	chr3	5173	87401435	87401935
B cell	chr5	9994	120621144	120621644
B cell	chr14	1686	25747450	25747950
B cell	chr4	11498	137367703	137368203
B cell	chr17	7479	70851616	70852116
B cell	chr2	16222	167775104	167775604
B cell	chr2	10459	118263223	118263723
B cell	chr10	4200	57602921	57603421
B cell	chr17	6221	51876474	51876974
B cell	chr7	610	16045943	16046443
B cell	chr1	13716	171917424	171917924
B cell	chr15	3260	55500016	55500516
B cell	chr19	6434	53899845	53900345
B cell	chr13	4677	52573004	52573504
B cell	chr6	12898	146697832	146698332
B cell	chr10	1669	20835107	20835607
B cell	chr3	2822	52572380	52572880
B cell	chr4	10030	130920906	130921406
B cell	chr10	4070	54005830	54006330
B cell	chr10	10890	117952790	117953290
B cell	chr16	3538	33606590	33607090
B cell	chr1	2571	43374959	43375459
B cell	chr4	10279	132583820	132584320
B cell	chr8	1213	14873745	14874245
B cell	chr5	10900	124475137	124475637
B cell	chr16	3122	31066687	31067187
B cell	chr11	2326	30187028	30187528
B cell	chr15	6890	84685418	84685918
B cell	chr7	11356	126704020	126704520
B cell	chr7	6431	80203451	80203951
B cell	chr7	10344	118119813	118120313
B cell	chr15	6792	84218634	84219134
B cell	chr8	7435	94365203	94365703
B cell	chr5	10903	124478147	124478647
B cell	chr16	6016	75909026	75909526
B cell	chr18	1883	32407252	32407752
B cell	chr1	13488	170934346	170934846
B cell	chr15	7956	96642493	96642993
B cell	chr3	6418	95972765	95973265
B cell	chr9	3297	45299130	45299630
B cell	chr6	9297	116673613	116674113
B cell	chr8	5307	72318687	72319187
B cell	chr13	750	13453191	13453691
B cell	chr1	11324	152798067	152798567
B cell	chr17	1453	17587304	17587804
B cell	chr7	8621	101213743	101214243
B cell	chr11	4755	55022927	55023427
B cell	chr17	2578	27826103	27826603
B cell	chr9	3050	44521815	44522315
B cell	chr12	8964	113168209	113168709
B cell	chr18	4790	62164100	62164600
B cell	chr13	1790	28502070	28502570
B cell	chr15	3629	59037566	59038066
B cell	chr15	7928	96474573	96475073
B cell	chr16	3557	33733072	33733572
B cell	chr17	4057	34286450	34286950
B cell	chr17	7788	72966901	72967401
B cell	chr3	5183	87506387	87506887
B cell	chr5	13617	146681461	146681961
B cell	chr6	8220	106750212	106750712
B cell	chr7	1669	25651264	25651764
B cell	chr7	5042	66200704	66201204
B cell	chr7	10909	122393964	122394464
B cell	chr7	12172	132365658	132366158
B cell	chr9	590	14926604	14927104
B cell	chr1	12375	161798860	161799360
B cell	chr17	6681	57078316	57078816
B cell	chr17	8791	83830518	83831018
B cell	chr4	6609	102574178	102574678
B cell	chr6	12675	145307165	145307665
B cell	chr2	14895	158682360	158682860
B cell	chr18	2350	35910077	35910577
B cell	chr12	5732	84188207	84188707
B cell	chr1	11842	156437237	156437737
B cell	chr16	4514	43951577	43952077
B cell	chr2	14639	157137946	157138446
B cell	chr14	1067	20885096	20885596
B cell	chr13	1948	30003084	30003584
B cell	chr18	4105	56470701	56471201
B cell	chr2	1390	19004714	19005214
B cell	chr6	7739	99057263	99057763
B cell	chr3	7359	103017327	103017827
B cell	chr11	6223	68498510	68499010
B cell	chr3	8755	121330124	121330624
B cell	chr4	8473	119000078	119000578
B cell	chr8	5267	72189322	72189822
B cell	chr7	2604	30842106	30842606
B cell	chr2	4943	50841803	50842303
B cell	chr16	7846	95827388	95827888
B cell	chr18	6139	75387312	75387812
B cell	chr5	12607	139299186	139299686
B cell	chr10	4104	54117756	54118256
B cell	chr8	5028	70803779	70804279
B cell	chr8	11321	126847477	126847977
B cell	chr17	5808	47942998	47943498
B cell	chr7	687	16296765	16297265
B cell	chr16	3954	36635308	36635808
B cell	chr17	6530	56443544	56444044
B cell	chr2	16033	167102013	167102513
B cell	chr2	2562	28539957	28540457
B cell	chr10	9498	97312360	97312860
B cell	chr10	11858	127162844	127163344
B cell	chr14	7872	102924580	102925080
B cell	chr8	9594	117527934	117528434
B cell	chr8	1251	14994301	14994801
B cell	chr19	3983	32712548	32713048
B cell	chr6	6938	90764112	90764612
B cell	chr2	2338	27311562	27312062
B cell	chr9	5026	60991416	60991916
B cell	chr18	5655	69662125	69662625
B cell	chr11	10968	98551382	98551882
B cell	chr17	7785	72960845	72961345
B cell	chr6	10463	125265159	125265659
B cell	chr4	10594	133622392	133622892
B cell	chr11	8173	79076449	79076949
B cell	chr11	8709	83640018	83640518
B cell	chr14	2226	30607688	30608188
B cell	chr7	2671	31089627	31090127
B cell	chr12	2342	36039377	36039877
B cell	chr11	12466	106669766	106670266
B cell	chr17	2305	26532617	26533117
B cell	chr6	11073	129275165	129275665
B cell	chr9	5163	61449437	61449937
B cell	chr11	4651	54727296	54727796
B cell	chr8	6398	84701097	84701597
B cell	chr12	4251	72844144	72844644
B cell	chr1	11958	156996432	156996932
B cell	chr11	3572	46313778	46314278
B cell	chr4	10718	134116923	134117423
B cell	chr1	7458	95667464	95667964
B cell	chr15	8783	100664885	100665385
B cell	chr2	17061	174436260	174436760
B cell	chr1	5995	85735661	85736161
B cell	chr4	2505	44667274	44667774
B cell	chr4	9216	125127195	125127695
B cell	chr11	11172	99170867	99171367
B cell	chr11	12836	109473596	109474096
B cell	chr5	8099	107687732	107688232
B cell	chr4	11205	135911362	135911862
B cell	chrX	3268	140505757	140506257
B cell	chr1	11618	155054537	155055037
B cell	chr14	5194	63416957	63417457
B cell	chr15	5024	74925819	74926319
B cell	chr16	844	11385721	11386221
B cell	chr17	8532	80772484	80772984
B cell	chr2	17080	174565776	174566276
B cell	chr5	4372	64884968	64885468
B cell	chr5	7191	100597891	100598391
B cell	chr5	10290	122209565	122210065
B cell	chr5	11408	130081213	130081713
B cell	chr7	3377	43407938	43408438
B cell	chr7	10299	117521367	117521867
B cell	chr8	10489	122700507	122701007
B cell	chr15	1193	25817174	25817674
B cell	chr17	7772	72934090	72934590
B cell	chr6	2434	38360010	38360510
B cell	chr2	1903	25195826	25196326
B cell	chr15	396	7113855	7114355
B cell	chr5	4333	64795733	64796233
B cell	chr11	9692	89027864	89028364
B cell	chr16	2385	24151269	24151769
B cell	chr1	12607	164135880	164136380
B cell	chr17	6059	50157886	50158386
B cell	chr14	3771	51128677	51129177
B cell	chr4	6160	98436594	98437094
B cell	chr1	3047	52800200	52800700
B cell	chr10	9033	94827839	94828339
B cell	chr9	10739	116145118	116145618
B cell	chr8	1863	25132412	25132912
B cell	chr14	5949	70076589	70077089
B cell	chr4	10714	134098584	134099084
B cell	chr8	213	4493176	4493676
B cell	chr7	6948	83655168	83655668
B cell	chr9	9994	109021387	109021887
B cell	chr2	14911	158719133	158719633
B cell	chr4	11190	135875919	135876419
B cell	chr4	9015	123563936	123564436
B cell	chr7	8633	101301940	101302440
B cell	chr6	3197	48745823	48746323
B cell	chr10	4202	57631789	57632289
B cell	chr2	4010	35463347	35463847
B cell	chr5	5852	86071543	86072043
B cell	chr4	1440	32358563	32359063
B cell	chr7	1570	25278656	25279156
B cell	chr8	148	3694104	3694604
B cell	chr6	3182	48708013	48708513
B cell	chr5	10798	124035785	124036285
B cell	chr6	7800	99300255	99300755
B cell	chr15	1358	27625221	27625721
B cell	chr10	8764	93171133	93171633
B cell	chr10	10758	117595698	117596198
B cell	chr11	9793	90264081	90264581
B cell	chr14	1944	27562537	27563037
B cell	chrX	1112	48147634	48148134
B cell	chr7	1807	27166947	27167447
B cell	chr1	1033	23720266	23720766
B cell	chr5	381	8943811	8944311
B cell	chr15	4353	66813898	66814398
B cell	chr18	3873	53877452	53877952
B cell	chr5	4127	64040613	64041113
B cell	chr9	3292	45294059	45294559
B cell	chr17	2373	26790158	26790658
B cell	chr13	8595	100642490	100642990
B cell	chr5	14100	149373920	149374420
B cell	chr8	10397	122432964	122433464
B cell	chr9	1618	31129905	31130405
B cell	chr5	1909	31870762	31871262
B cell	chr14	1905	27351450	27351950
B cell	chr7	3357	42980029	42980529
B cell	chr10	9147	95389113	95389613
B cell	chr18	6722	80691771	80692271
B cell	chr11	2028	23823239	23823739
B cell	chr13	7160	83075576	83076076
B cell	chr17	1950	25044836	25045336
B cell	chr10	10854	117860854	117861354
B cell	chr3	6424	95987667	95988167
B cell	chr11	13822	116423938	116424438
B cell	chr4	3032	47746467	47746967
B cell	chr6	8819	113660309	113660809
B cell	chr10	9576	98880607	98881107
B cell	chr4	30	3656165	3656665
B cell	chr5	12880	140617708	140618208
B cell	chr11	9131	86399120	86399620
B cell	chr13	990	17975848	17976348
B cell	chr5	4022	62846671	62847171
B cell	chr15	4372	66865143	66865643
B cell	chr16	2982	30389992	30390492
B cell	chrX	3808	159649987	159650487
B cell	chr8	10499	122739259	122739759
B cell	chr8	5284	72267122	72267622
B cell	chr11	9690	89024133	89024633
B cell	chr4	10024	130912985	130913485
B cell	chr2	5845	61578296	61578796
B cell	chr1	2550	43241240	43241740
B cell	chr1	7979	107447158	107447658
B cell	chr10	1442	19669046	19669546
B cell	chr10	9626	99126903	99127403
B cell	chr11	3743	48900901	48901401
B cell	chr11	13641	115929712	115930212
B cell	chr13	2536	35131330	35131830
B cell	chr13	3530	43762881	43763381
B cell	chr13	9707	111867129	111867629
B cell	chr14	5199	63437848	63438348
B cell	chr15	7654	91680029	91680529
B cell	chr16	7887	96109633	96110133
B cell	chr18	4203	56981081	56981581
B cell	chr19	307	4190813	4191313
B cell	chr19	5653	46240148	46240648
B cell	chr2	7774	79713604	79714104
B cell	chr3	820	19348177	19348677
B cell	chr3	6514	96576627	96577127
B cell	chr4	1388	32229205	32229705
B cell	chr4	6589	102506826	102507326
B cell	chr6	996	22330511	22331011
B cell	chr6	8821	113661416	113661916
B cell	chr6	10443	125222069	125222569
B cell	chr7	7638	92817112	92817612
B cell	chr7	7770	96730323	96730823
B cell	chr8	5822	79612966	79613466
B cell	chr9	40	5311406	5311906
B cell	chr9	10664	115487116	115487616
B cell	chr14	6215	72691373	72691873
B cell	chr5	11223	127615409	127615909
B cell	chr18	6465	78141947	78142447
B cell	chr7	2499	30394335	30394835
B cell	chr2	16964	173469713	173470213
B cell	chr5	10508	122949068	122949568
B cell	chr5	7764	105110069	105110569
B cell	chr11	10292	95834008	95834508
B cell	chr8	2267	31120811	31121311
B cell	chr18	4455	60806220	60806720
B cell	chr2	1600	22773397	22773897
B cell	chr5	7590	103746684	103747184
B cell	chr16	5190	52470142	52470642
B cell	chr7	12854	139402656	139403156
B cell	chr4	4071	59531083	59531583
B cell	chr13	9709	111868284	111868784
B cell	chr2	4007	35461149	35461649
B cell	chr16	5115	52038163	52038663
B cell	chr5	7841	105661802	105662302
B cell	chr13	8499	99955467	99955967
B cell	chr19	7194	60182891	60183391
B cell	chr3	8452	115702009	115702509
B cell	chr1	7439	95590010	95590510
B cell	chr10	10925	118100524	118101024
B cell	chr11	2017	23778618	23779118
B cell	chr16	3919	36476834	36477334
B cell	chr2	15588	165056259	165056759
B cell	chr10	9358	96333224	96333724
B cell	chr14	7976	103649907	103650407
B cell	chr12	1262	21335794	21336294
B cell	chr4	11488	137345738	137346238
B cell	chr15	8811	100732586	100733086
B cell	chr10	4552	60260480	60260980
B cell	chr1	9042	128605758	128606258
B cell	chr8	10491	122702215	122702715
B cell	chr10	5947	71239506	71240006
B cell	chr7	13341	142442576	142443076
B cell	chr1	3139	53850752	53851252
B cell	chr19	6337	53464630	53465130
B cell	chr2	6583	70092556	70093056
B cell	chr5	10010	120687845	120688345
B cell	chr5	12977	141018231	141018731
B cell	chr6	3979	54117173	54117673
B cell	chr7	1684	25683479	25683979
B cell	chr8	7996	104631219	104631719
B cell	chr10	9097	95151016	95151516
B cell	chr12	1959	32212674	32213174
B cell	chr1	11410	153414959	153415459
B cell	chr11	6354	69078775	69079275
B cell	chr2	830	11637100	11637600
B cell	chr3	4114	69156409	69156909
B cell	chr16	4663	45251607	45252107
B cell	chr1	5628	80401907	80402407
B cell	chr17	2677	28211750	28212250
B cell	chr15	5390	76770537	76771037
B cell	chr6	3171	48689288	48689788
B cell	chr5	10986	125052603	125053103
B cell	chr17	4071	34306321	34306821
B cell	chr12	3290	55019284	55019784
B cell	chr12	8855	112860739	112861239
B cell	chr4	2508	44672505	44673005
B cell	chr10	4475	59980693	59981193
B cell	chr11	10555	96987769	96988269
B cell	chr3	5988	93506253	93506753
B cell	chr3	3387	59054778	59055278
B cell	chr13	1394	23581297	23581797
B cell	chr15	5805	78927917	78928417
B cell	chr16	2899	30024623	30025123
B cell	chr7	8168	99120802	99121302
B cell	chr1	16289	195176536	195177036
B cell	chr11	3795	49249752	49250252
B cell	chr10	7050	80141193	80141693
B cell	chr10	11825	127074980	127075480
B cell	chr13	4683	52582306	52582806
B cell	chr14	830	19968269	19968769
B cell	chr15	5018	74918399	74918899
B cell	chr1	14834	181852947	181853447
B cell	chr2	4509	43748515	43749015
B cell	chr3	986	21952899	21953399
B cell	chr14	963	20379646	20380146
B cell	chr15	8938	101253910	101254410
B cell	chr2	4439	39008941	39009441
B cell	chr8	11311	126832560	126833060
B cell	chr8	9821	119806682	119807182
B cell	chr1	9150	130550643	130551143
B cell	chr1	14758	181237178	181237678
B cell	chr10	11142	120191089	120191589
B cell	chr11	12711	108178664	108179164
B cell	chr12	5122	79983208	79983708
B cell	chr12	9263	117566161	117566661
B cell	chr13	1128	20228120	20228620
B cell	chr13	1568	24398424	24398924
B cell	chr13	9642	111634567	111635067
B cell	chr15	3950	61981349	61981849
B cell	chr15	4121	64046366	64046866
B cell	chr16	1665	19052776	19053276
B cell	chr16	2454	24446381	24446881
B cell	chr17	3963	34092065	34092565
B cell	chr17	8698	83278498	83278998
B cell	chr19	1833	11491185	11491685
B cell	chr19	4748	40615957	40616457
B cell	chr2	317	5417608	5418108
B cell	chr2	368	5930526	5931026
B cell	chr5	4375	64896568	64897068
B cell	chr5	13727	147338884	147339384
B cell	chr6	585	13695134	13695634
B cell	chr6	8283	108197100	108197600
B cell	chr7	8698	101454454	101454954
B cell	chr8	8840	110954725	110955225
B cell	chr9	3913	50773947	50774447
B cell	chr19	4561	38026088	38026588
B cell	chr8	4616	69270677	69271177
B cell	chr16	7039	91521890	91522390
B cell	chr2	488	6723566	6724066
B cell	chr18	4787	62156417	62156917
B cell	chrX	3455	144525972	144526472
B cell	chr11	12170	104582628	104583128
B cell	chr17	4094	34354937	34355437
B cell	chr7	6005	75701702	75702202
B cell	chr6	2566	39007146	39007646
B cell	chr1	13718	171920896	171921396
B cell	chr5	7196	100614041	100614541
B cell	chr2	6582	70091739	70092239
B cell	chr5	1698	30666474	30666974
B cell	chr5	12827	140374178	140374678
B cell	chr11	29	3335749	3336249
B cell	chr13	9544	110356983	110357483
B cell	chr6	6949	90825028	90825528
B cell	chr14	5566	66232156	66232656
B cell	chr19	5932	47133024	47133524
B cell	chr14	4691	59396943	59397443
B cell	chr9	8444	96399372	96399872
B cell	chr5	1001	23432582	23433082
B cell	chr14	5601	66303188	66303688
B cell	chr7	13111	141194767	141195267
B cell	chr12	6917	99642714	99643214
B cell	chr1	11843	156459592	156460092
B cell	chr5	1880	31698248	31698748
B cell	chr1	14146	177258261	177258761
B cell	chr7	5972	75596029	75596529
B cell	chr12	5376	81719675	81720175
B cell	chr15	8487	99364927	99365427
B cell	chr6	10272	124720847	124721347
B cell	chr13	665	12460374	12460874
B cell	chr6	427	8687095	8687595
B cell	chr11	12566	107102418	107102918
B cell	chr16	7030	91480486	91480986
B cell	chr3	6857	98348013	98348513
B cell	chr15	3473	58215127	58215627
B cell	chr9	3096	44645936	44646436
B cell	chr7	5382	68282514	68283014
B cell	chr16	3269	32124302	32124802
B cell	chr3	5849	90586865	90587365
B cell	chr3	8487	115902240	115902740
B cell	chr15	5032	74933648	74934148
B cell	chr16	6997	91416962	91417462
B cell	chr16	2271	23286449	23286949
B cell	chr3	7355	102946859	102947359
B cell	chr5	5448	75066793	75067293
B cell	chrX	1157	48433411	48433911
B cell	chr1	6385	87657970	87658470
B cell	chr7	6571	80779303	80779803
B cell	chr13	10332	117028208	117028708
B cell	chr16	2499	24593465	24593965
B cell	chr3	4780	84069250	84069750
B cell	chr7	2053	28440758	28441258
B cell	chr4	4480	63399199	63399699
B cell	chr9	1217	22649533	22650033
B cell	chr15	6560	82888332	82888832
B cell	chr13	3821	45443078	45443578
B cell	chr6	6933	90756604	90757104
B cell	chr1	15392	187378016	187378516
B cell	chr12	5742	84202499	84202999
B cell	chr19	1017	6860675	6861175
B cell	chr5	7052	99451888	99452388
B cell	chr1	3110	53773920	53774420
B cell	chr2	16127	167537283	167537783
B cell	chr3	11689	152912162	152912662
B cell	chr1	3266	54913291	54913791
B cell	chr5	13634	146781559	146782059
B cell	chr17	9255	86378575	86379075
B cell	chr13	5177	55529160	55529660
B cell	chr2	11421	126601891	126602391
B cell	chr1	12912	165700451	165700951
B cell	chr4	4003	59261022	59261522
B cell	chr17	9347	86969567	86970067
B cell	chr19	1275	8019191	8019691
B cell	chr16	3042	30623627	30624127
B cell	chr16	4942	49818529	49819029
B cell	chr13	9757	112001590	112002090
B cell	chr16	6019	75920796	75921296
B cell	chr17	370	5801809	5802309
B cell	chr4	11065	135313741	135314241
B cell	chr5	9316	115516606	115517106
B cell	chr14	1590	25483963	25484463
B cell	chr1	10793	144173618	144174118
B cell	chr1	11392	153304074	153304574
B cell	chr1	14514	180251091	180251591
B cell	chr10	6811	79417007	79417507
B cell	chr10	8827	93353928	93354428
B cell	chr11	10594	97141967	97142467
B cell	chr12	873	16049467	16049967
B cell	chr12	4726	76552920	76553420
B cell	chr13	1502	23911264	23911764
B cell	chr13	4691	52600299	52600799
B cell	chr13	9159	107094460	107094960
B cell	chr14	6456	74908218	74908718
B cell	chr15	4909	73717882	73718382
B cell	chr16	2903	30034964	30035464
B cell	chr17	4061	34292947	34293447
B cell	chr18	3880	53903482	53903982
B cell	chr18	5232	66453229	66453729
B cell	chr19	4889	41382443	41382943
B cell	chr2	3473	32587674	32588174
B cell	chr2	16945	173385490	173385990
B cell	chr3	10609	139245199	139245699
B cell	chr4	3439	54406052	54406552
B cell	chr4	4009	59265804	59266304
B cell	chr4	7758	114652371	114652871
B cell	chr6	11025	129088513	129089013
B cell	chr7	11158	125630301	125630801
B cell	chr7	11235	126210810	126211310
B cell	chr8	9179	114816327	114816827
B cell	chr8	9368	116633827	116634327
B cell	chr9	1057	21609841	21610341
B cell	chr9	1828	32391018	32391518
B cell	chr15	348	6705456	6705956
B cell	chr4	10462	133170051	133170551
B cell	chr16	6336	84583808	84584308
B cell	chr15	5609	78244560	78245060
B cell	chr7	9966	114317387	114317887
B cell	chr10	11859	127164876	127165376
B cell	chr1	12962	165934832	165935332
B cell	chr9	4064	52229629	52230129
B cell	chr8	8516	107291131	107291631
B cell	chr2	10334	117303883	117304383
B cell	chr5	3156	43884946	43885446
B cell	chr5	769	20932536	20933036
B cell	chr11	10270	95712491	95712991
B cell	chr16	5478	57336659	57337159
B cell	chr11	4677	54826759	54827259
B cell	chr4	1073	20589144	20589644
B cell	chr5	1075	23894180	23894680
B cell	chr5	7848	105683755	105684255
B cell	chr2	1615	22807267	22807767
B cell	chr4	2936	47010892	47011392
B cell	chrX	1795	73914786	73915286
B cell	chr4	445	9649353	9649853
B cell	chr7	10837	122018230	122018730
B cell	chr1	6386	87659188	87659688
B cell	chrX	4174	167119259	167119759
B cell	chr1	13485	170927399	170927899
B cell	chr10	2786	39402529	39403029
B cell	chr5	4474	65514847	65515347
B cell	chr4	3050	48043195	48043695
B cell	chr7	8925	104291506	104292006
B cell	chr11	554	5789818	5790318
B cell	chr2	8706	93427285	93427785
B cell	chr13	4445	51401121	51401621
B cell	chr14	8773	121324902	121325402
B cell	chr10	750	12866813	12867313
B cell	chr19	6601	55643353	55643853
B cell	chr13	9576	110563882	110564382
B cell	chr12	2301	35711500	35712000
B cell	chr17	4562	36020635	36021135
B cell	chr4	2468	44168060	44168560
B cell	chr6	9402	117900123	117900623
B cell	chr7	10360	118244215	118244715
B cell	chr13	3548	43790448	43790948
B cell	chr17	8779	83772734	83773234
B cell	chr15	182	5244014	5244514
B cell	chr1	10294	136134960	136135460
B cell	chr7	1270	19871175	19871675
B cell	chr8	6302	84197363	84197863
B cell	chr9	10880	118040681	118041181
B cell	chr10	761	12903721	12904221
B cell	chr15	6246	81104772	81105272
B cell	chr16	2741	27349235	27349735
B cell	chr5	14329	151642874	151643374
B cell	chr6	6930	90751580	90752080
B cell	chr7	6001	75686506	75687006
B cell	chr17	5829	48107329	48107829
B cell	chr5	14011	148976796	148977296
B cell	chr1	9062	128695880	128696380
B cell	chr1	5535	79629608	79630108
B cell	chr16	4945	49840223	49840723
B cell	chr4	4146	59815352	59815852
B cell	chr1	13687	171698905	171699405
B cell	chr1	6100	86228647	86229147
B cell	chr3	2796	52459960	52460460
B cell	chr13	5581	59656179	59656679
B cell	chr15	4764	73155226	73155726
B cell	chr16	3977	36709435	36709935
B cell	chr18	88	4349549	4350049
B cell	chr2	3052	31062180	31062680
B cell	chr6	9302	116682199	116682699
B cell	chr15	4337	66785313	66785813
B cell	chr7	3989	45922817	45923317
B cell	chr2	7771	79695889	79696389
B cell	chr5	1302	25081517	25082017
B cell	chr16	5523	57550005	57550505
B cell	chr5	9732	118466319	118466819
B cell	chr6	10273	124723582	124724082
B cell	chr1	11681	155222957	155223457
B cell	chr7	8920	104240788	104241288
B cell	chr4	13407	149856384	149856884
B cell	chr12	906	16384327	16384827
B cell	chr5	10011	120688348	120688848
B cell	chr11	14353	118243571	118244071
B cell	chr17	3016	29393568	29394068
B cell	chr7	10323	117613679	117614179
B cell	chr5	13856	148399607	148400107
B cell	chr4	8515	119181399	119181899
B cell	chr8	3929	57576111	57576611
B cell	chr10	4931	62506152	62506652
B cell	chr2	5309	58137634	58138134
B cell	chr8	6193	83738047	83738547
B cell	chr15	3673	59089798	59090298
B cell	chr17	2304	26531539	26532039
B cell	chr2	16088	167375101	167375601
B cell	chr6	9303	116693537	116694037
B cell	chr10	4106	54119242	54119742
B cell	chr16	2373	24076370	24076870
B cell	chr7	9117	107707722	107708222
B cell	chr13	1396	23585815	23586315
B cell	chr7	8326	99795400	99795900
B cell	chr4	13345	149657962	149658462
B cell	chr1	9620	132533804	132534304
B cell	chr1	12961	165927848	165928348
B cell	chr12	1570	26410414	26410914
B cell	chr13	2799	37674911	37675411
B cell	chr15	6488	82187000	82187500
B cell	chr15	6495	82224147	82224647
B cell	chr16	5152	52147300	52147800
B cell	chr17	131	4881408	4881908
B cell	chr17	7778	72947031	72947531
B cell	chr2	1384	18983455	18983955
B cell	chr2	2277	27025525	27026025
B cell	chr2	7944	83929339	83929839
B cell	chr4	10458	133159613	133160113
B cell	chr5	7766	105139327	105139827
B cell	chr6	10731	127472011	127472511
B cell	chr8	3419	46713135	46713635
B cell	chr9	2618	42083712	42084212
B cell	chrX	4202	167231084	167231584
B cell	chr10	2779	39369437	39369937
B cell	chr7	92	3897986	3898486
B cell	chr11	3434	45116702	45117202
B cell	chr3	821	19349945	19350445
B cell	chr15	7881	95963002	95963502
B cell	chr18	3633	50016633	50017133
B cell	chr11	8595	82952499	82952999
B cell	chr19	3846	32254993	32255493
B cell	chr18	6097	75304315	75304815
B cell	chr11	4788	55130952	55131452
B cell	chr3	370	9828607	9829107
B cell	chr12	6000	85446921	85447421
B cell	chr4	2318	43478095	43478595
B cell	chr11	11176	99186786	99187286
B cell	chr11	7287	74838345	74838845
B cell	chr3	7746	105900716	105901216
B cell	chr14	16	7773848	7774348
B cell	chr7	9431	110796570	110797070
B cell	chr14	4568	57772367	57772867
B cell	chr19	339	4294239	4294739
B cell	chr5	13120	142794566	142795066
B cell	chr10	8626	91027865	91028365
B cell	chr3	6003	93549894	93550394
B cell	chr8	10440	122556539	122557039
B cell	chr17	4056	34285776	34286276
B cell	chr11	12086	104000982	104001482
B cell	chr9	11183	119978072	119978572
B cell	chr11	12362	106305723	106306223
B cell	chr13	5097	55369514	55370014
B cell	chrX	2828	107088976	107089476
B cell	chr10	6704	78298054	78298554
B cell	chr14	8984	122053246	122053746
B cell	chr19	328	4231537	4232037
B cell	chr8	10884	124700861	124701361
B cell	chr6	2433	38354385	38354885
B cell	chr4	2248	43043833	43044333
B cell	chr8	9370	116635858	116636358
B cell	chr10	7992	85952035	85952535
B cell	chr16	3045	30646049	30646549
B cell	chr8	10014	120486872	120487372
B cell	chr14	4843	60736688	60737188
B cell	chr17	3412	31295089	31295589
B cell	chr13	9700	111821676	111822176
B cell	chr13	2063	30748983	30749483
B cell	chr9	5198	61702423	61702923
B cell	chr11	5576	61652953	61653453
B cell	chr15	8933	101246277	101246777
B cell	chr3	6417	95972212	95972712
B cell	chr5	10295	122219519	122220019
B cell	chr1	13441	170709461	170709961
B cell	chr3	5290	88141390	88141890
B cell	chr11	10963	98545810	98546310
B cell	chr16	5504	57471091	57471591
B cell	chr14	6562	75445535	75446035
B cell	chr15	9346	103168788	103169288
B cell	chr6	428	8691185	8691685
B cell	chr6	670	15745780	15746280
B cell	chr7	11143	125599384	125599884
B cell	chr10	2956	40163256	40163756
B cell	chr2	16606	170252596	170253096
B cell	chr15	3756	59520439	59520939
B cell	chr5	13689	147049749	147050249
B cell	chrX	2269	96130654	96131154
B cell	chr13	3662	44518110	44518610
B cell	chr6	12783	145893155	145893655
B cell	chr7	16	3289615	3290115
B cell	chr7	11020	123330521	123331021
B cell	chr4	698	11704129	11704629
B cell	chr11	1003	11506150	11506650
B cell	chr10	6564	77530031	77530531
B cell	chr17	3932	33978640	33979140
B cell	chr19	654	5662260	5662760
B cell	chr5	5020	72182695	72183195
B cell	chr6	11781	136484016	136484516
B cell	chr17	7029	64754012	64754512
B cell	chr19	4886	41372304	41372804
B cell	chr5	5021	72183958	72184458
B cell	chr11	11467	101115512	101116012
B cell	chr17	3350	31039588	31040088
B cell	chrX	1130	48284574	48285074
B cell	chr7	8596	101059100	101059600
B cell	chr9	10533	114742700	114743200
B cell	chr2	11949	129373202	129373702
B cell	chr6	6162	85966124	85966624
B cell	chr4	9379	126536754	126537254
B cell	chr5	11892	135479217	135479717
B cell	chr3	9338	126822262	126822762
B cell	chr5	1073	23874449	23874949
B cell	chr7	507	12949359	12949859
B cell	chr3	5787	90265514	90266014
B cell	chr2	5632	60019060	60019560
B cell	chr10	10577	116565090	116565590
B cell	chr13	1379	23543205	23543705
B cell	chr16	4013	36934738	36935238
B cell	chr5	873	21517495	21517995
B cell	chr17	3019	29395403	29395903
B cell	chr2	16985	173659411	173659911
B cell	chr14	5947	70074684	70075184
B cell	chr4	6841	105316772	105317272
B cell	chr12	3823	69446467	69446967
B cell	chr1	1443	34472484	34472984
B cell	chr4	11092	135439160	135439660
B cell	chr8	59	3355486	3355986
B cell	chr1	9061	128675498	128675998
B cell	chr8	2754	35633918	35634418
B cell	chr4	11007	135203134	135203634
B cell	chr1	1860	37309944	37310444
B cell	chr1	5455	78422557	78423057
B cell	chr1	8182	118453601	118454101
B cell	chr1	10287	136118784	136119284
B cell	chr1	14605	180536538	180537038
B cell	chr11	11324	100584583	100585083
B cell	chr12	6120	85969573	85970073
B cell	chr12	6127	85992438	85992938
B cell	chr12	6724	98577925	98578425
B cell	chr13	7216	84185708	84186208
B cell	chr13	9907	112666554	112667054
B cell	chr15	1934	34932982	34933482
B cell	chr15	5548	77846182	77846682
B cell	chr17	8706	83339260	83339760
B cell	chr18	4224	57307441	57307941
B cell	chr19	824	6048633	6049133
B cell	chr2	2304	27121942	27122442
B cell	chr2	5198	53850728	53851228
B cell	chr2	14637	157133642	157134142
B cell	chr2	17115	178020672	178021172
B cell	chr3	1630	31061407	31061907
B cell	chr3	6853	98337168	98337668
B cell	chr3	9043	122403917	122404417
B cell	chr4	1492	32564887	32565387
B cell	chr4	1500	32588198	32588698
B cell	chr4	3687	57091238	57091738
B cell	chr4	8612	119669310	119669810
B cell	chr4	10320	132780206	132780706
B cell	chr4	11134	135618098	135618598
B cell	chr5	12887	140636626	140637126
B cell	chr5	13610	146655356	146655856
B cell	chr6	10722	127398054	127398554
B cell	chr7	4847	64037872	64038372
B cell	chr7	5617	72275332	72275832
B cell	chr8	10119	120746324	120746824
B cell	chr9	1975	32962639	32963139
B cell	chr9	4750	58266423	58266923
B cell	chr9	5185	61667449	61667949
B cell	chrX	2268	96130101	96130601
B cell	chr7	11146	125603174	125603674
B cell	chr2	7090	73495886	73496386
B cell	chr5	1040	23637230	23637730
B cell	chr3	8462	115714769	115715269
B cell	chr16	3568	33756408	33756908
B cell	chr14	961	20370692	20371192
B cell	chr2	353	5804365	5804865
B cell	chr3	10230	135628725	135629225
B cell	chr5	7216	100662907	100663407
B cell	chr7	10891	122310129	122310629
B cell	chr14	7180	79515307	79515807
B cell	chr8	2519	33968126	33968626
B cell	chr15	420	7216920	7217420
B cell	chr4	12225	140983338	140983838
B cell	chr10	5202	66998722	66999222
B cell	chr2	11964	129489440	129489940
B cell	chr13	2465	34667108	34667608
B cell	chr2	4440	39011165	39011665
B cell	chr11	10306	95869914	95870414
B cell	chr1	12914	165705721	165706221
B cell	chr13	2793	37657982	37658482
B cell	chr10	5062	63176369	63176869
B cell	chr9	2122	35546623	35547123
B cell	chr2	15587	165055375	165055875
B cell	chr4	11009	135206095	135206595
B cell	chr17	3064	29494128	29494628
B cell	chr18	5186	65802155	65802655
B cell	chr4	206	6445063	6445563
B cell	chr17	8697	83277301	83277801
B cell	chr9	10608	115134566	115135066
B cell	chr14	4008	54351034	54351534
B cell	chr19	6334	53460293	53460793
B cell	chr1	13981	174040793	174041293
B cell	chr2	833	11653297	11653797
B cell	chr11	11148	99132306	99132806
B cell	chr16	7085	91685492	91685992
B cell	chr5	7409	102498690	102499190
B cell	chr12	8839	112761963	112762463
B cell	chr7	9992	114562383	114562883
B cell	chr2	1351	18897819	18898319
B cell	chr7	15	3289065	3289565
B cell	chr15	5707	78571506	78572006
B cell	chr8	5285	72268279	72268779
B cell	chr17	7636	71479331	71479831
B cell	chr14	6785	76579688	76580188
B cell	chr16	3982	36717467	36717967
B cell	chr3	2010	36853940	36854440
B cell	chr4	53	3724643	3725143
B cell	chr5	4260	64487751	64488251
B cell	chr10	2681	37231774	37232274
B cell	chr11	3361	44475444	44475944
B cell	chr15	1426	27826190	27826690
B cell	chr7	2512	30421405	30421905
B cell	chr10	4231	57799455	57799955
B cell	chr15	2201	36931378	36931878
B cell	chr2	1726	24311620	24312120
B cell	chr4	10639	133804344	133804844
B cell	chr6	3538	51150417	51150917
B cell	chr9	1171	22324454	22324954
B cell	chr9	7271	77992263	77992763
B cell	chr10	6185	75429331	75429831
B cell	chr3	3399	59119883	59120383
B cell	chr10	9543	98744127	98744627
B cell	chr17	6958	63931499	63931999
B cell	chr11	11177	99189121	99189621
B cell	chr7	11164	125638835	125639335
B cell	chr17	8801	83847720	83848220
B cell	chr9	4753	58272166	58272666
B cell	chr2	14903	158700912	158701412
B cell	chr5	4434	65322177	65322677
B cell	chr8	2611	34744102	34744602
B cell	chr8	6198	83742197	83742697
B cell	chr15	8396	98985622	98986122
B cell	chr8	11330	126867560	126868060
B cell	chr9	192	8017178	8017678
B cell	chr6	3027	47636376	47636876
B cell	chr6	10726	127447634	127448134
B cell	chr18	4806	62188700	62189200
B cell	chr7	8161	99101617	99102117
B cell	chr11	9397	87756445	87756945
B cell	chr2	13984	153090478	153090978
B cell	chr1	15730	191197829	191198329
B cell	chr2	15485	164521904	164522404
B cell	chr8	5331	72364851	72365351
B cell	chr9	3068	44568066	44568566
B cell	chr10	400	7839457	7839957
B cell	chr11	5574	61647013	61647513
B cell	chr3	3751	65515731	65516231
B cell	chr11	7286	74837522	74838022
B cell	chr6	12645	145121495	145121995
B cell	chr16	5137	52090825	52091325
B cell	chr3	10430	137953111	137953611
B cell	chr13	491	9408977	9409477
B cell	chr19	1721	10842153	10842653
B cell	chr10	4518	60168866	60169366
B cell	chr4	9381	126540670	126541170
B cell	chr6	11879	136930740	136931240
B cell	chr2	16585	170184465	170184965
B cell	chr17	3038	29437003	29437503
B cell	chr2	4301	38211349	38211849
B cell	chr17	4506	35870179	35870679
B cell	chr2	4223	37731375	37731875
B cell	chr1	2922	51934476	51934976
B cell	chr4	14400	155162330	155162830
B cell	chr8	5206	71723072	71723572
B cell	chr9	5853	65542004	65542504
B cell	chr7	1686	25686585	25687085
B cell	chr2	12230	131190544	131191044
B cell	chr1	1532	35619450	35619950
B cell	chr1	4033	62482967	62483467
B cell	chr1	6366	87621383	87621883
B cell	chr10	3922	52373795	52374295
B cell	chr10	4084	54040880	54041380
B cell	chr10	10876	117910311	117910811
B cell	chr11	2163	26585993	26586493
B cell	chr11	14337	118218796	118219296
B cell	chr13	223	5779332	5779832
B cell	chr13	1621	24634380	24634880
B cell	chr13	9357	108686726	108687226
B cell	chr13	10193	114887245	114887745
B cell	chr14	6000	70283552	70284052
B cell	chr14	6323	73333776	73334276
B cell	chr14	8973	122013518	122014018
B cell	chr16	649	10499110	10499610
B cell	chr16	3410	32866701	32867201
B cell	chr17	408	5897319	5897819
B cell	chr17	5237	45631897	45632397
B cell	chr17	6236	52079257	52079757
B cell	chr18	5120	65327020	65327520
B cell	chr19	3986	32754292	32754792
B cell	chr19	4470	37466294	37466794
B cell	chr2	13095	144112486	144112986
B cell	chr2	16607	170254013	170254513
B cell	chr3	9739	130796388	130796888
B cell	chr4	2516	44705150	44705650
B cell	chr4	13358	149705890	149706390
B cell	chr5	5118	72812856	72813356
B cell	chr6	3537	51144649	51145149
B cell	chr8	5960	81353421	81353921
B cell	chr9	1061	21625271	21625771
B cell	chr9	3066	44565285	44565785
B cell	chr9	8529	96752799	96753299
B cell	chr9	10794	116329116	116329616
B cell	chr9	10966	118726495	118726995
B cell	chr17	372	5803084	5803584
B cell	chr14	6529	75176601	75177101
[truncated: 83,214 more rows]
