# Supplementary material for: Analysis of potential biomarkers for diabetic kidney disease based on single-cell RNA-sequencing integrated with a single-cell sequencing assay for transposase-accessible chromatin
Source: Aging (Albany NY). 2023 Oct 11;15(19):10681–704. doi: 10.18632/aging.205107 (PMC10599739; doi:10.18632/aging.205107)
Supplement: Supplementary Table 6 [file aging-15-205107-s007.xlsx]

## Sheet: aging-23-016299-s007
Supplementary Table 6. Cell type specific enrich motifs.
TF	mlog10Padj.B.cell	mlog10Padj.CD	mlog10Padj.DCT	mlog10Padj.endo	mlog10Padj.LOH	mlog10Padj.M1	mlog10Padj.M2	mlog10Padj.Neut	mlog10Padj.NK	mlog10Padj.podo	mlog10Padj.PTB	mlog10Padj.PTS1.	mlog10Padj.PTS2	mlog10Padj.PTS3	mlog10Padj.T.cell
Tcfap2a_1	0	0	8818375749	0	1488056575	0	0	0	0.418557491	0	0	0	0	0	0
Tcfap2b_2	0.340757491	0	6793685749	0.419557491	1147107575	0	0	0	0	0	0	0.266657491	0	0	0
Tcfap2c_3	0.593557491	0	8891265749	0	1620997575	0	0	0	1855357491	0	0	0.403257491	0	0	0
Tcfap2e_4	0	0	6772085749	0	1214452575	0	0	0	0	0	0	0.056357491	0	0	0
Tcfap2d_5	1093857491	0	6393357491	0	3078505749	0	0	0	1952557491	0	0.558557491	0	0	0	0.106157491
Arid3b_6	0	0	2449657491	0	0	0	0	0	0	0	0	0	0.890657491	5006657491	0
Arid3a_7	0	0	0	0	0	0	0	0	0	0	0	0	0	0.886157491	0
Arid5b_8	0	0	0	0	0	0	0	0	0	0	0.044557491	0	0	0	0
Arid5a_9	0	0	0	0	0	0	0	0	0	0	0	0	0.907357491	5034657491	0
Arid3c_10	0	0	0.449457491	0	0	0	0	0	0	0	0	0	0	0	0
Arid2_11	3109357491	0	2013455749	1956457491	1109125749	0	0	0	3629457491	0	0	0	0	0	8435557491
Setbp1_12	0	0	0	0	0	1315357491	0	0	0	0	0	0	0	0	0
Ahctf1_13	0	0	0	0	0	0	0	0	0	0	0	0	0	0.771357491	0
Hmga2_14	0	0	1210145749	0	0.457057491	0	0	0	0	0	0	0	0	0.054357491	0
Phf21a_15	0	0	0	0	0	0	0	0	0	0	0	0	0.454957491	4453857491	0
Zfp957_16	0	0	0	0	0	0	0	0	0	0	0	0	0	1893057491	0
Tcfe3_17	9688657491	0	1711857491	0	3262157491	1346457491	3556057491	0	3746157491	0.049657491	0	1279935749	0	0	4539757491
Mnt_18	0	0	0.425557491	0	0.621457491	0	0.036457491	0	0	0	0	0.711857491	0	0	0
Npas1_19	0	0	0	0	1245057491	0.189857491	0	0	0.273157491	0	0	0	0	0	0.669557491
Tcfap4_20	0	0	0.368357491	3117165749	0	0	0.251657491	0	0	0	0	0	0	0	0
Twist2_21	0	0	0	0	0	0.389857491	0	0	0	0	0	0	0	0	0
Id3_22	1504705749	0	2081895749	3949685749	1666725749	0	0	0	0	0	0	0	0	0	3308457491
Ascl2_23	6329357491	0	1034645749	8984725749	6918157491	0	0	0	1182957491	0.674657491	0	1792857491	0	0	3087957491
Myod1_24	2275805749	0	1180385749	1044518575	7518657491	0	0.252457491	0	1979657491	0	0	0.355057491	0	0	5807557491
Arnt_25	1973257491	0	0.640557491	0	0.880257491	0	1786057491	0	0.472957491	0	0	7489657491	0	0	1306257491
Arnt2_26	0.568757491	0	0.958257491	0	0	0.257057491	1078557491	0	0	0	0	5025457491	0	0	0
Mlx_27	2367157491	0	0.875357491	0.047857491	1561557491	0	0.587457491	0	0.514957491	0	0	8287357491	0	0.064857491	6155457491
Ahr_28	0.471157491	0	0.286857491	0	0.397757491	0	0	0	2118457491	0	1504757491	0	0	0	1605757491
Hey2_29	0.273857491	0	1310857491	0	2157857491	0	2697957491	0	0	0	0	2382657491	0	0	1210857491
Sim1_30	0	0	0	0	1245057491	0.189857491	0	0	0.273157491	0	0	0	0	0	0.669557491
Tcf3_31	1101275749	0	1918305749	3868325749	2039715749	0	0	0	0	0	0	0	0	0	1356157491
Srebf1_32	2990057491	0	0	0.681357491	0	0	2521257491	0	0.997957491	0.154857491	0	2088057491	0	0	1533857491
Id2_33	0.375557491	0	0.896957491	0	0.892657491	0	1417357491	0	0	0	0	1083185749	0	0.587357491	1701657491
Npas3_34	0	0	0	0	1245057491	0.189857491	0	0	0.273157491	0	0	0	0	0	0.669557491
Id4_35	1504705749	0	2081895749	3949685749	1666725749	0	0	0	0	0	0	0	0	0	3308457491
Ahrr_36	0.471157491	0	0.286857491	0	0.397757491	0	0	0	2118457491	0	1504757491	0	0	0	1605757491
Myc_37	0	0	0	0.314357491	0	0	0	0	0	0	0	0	0	0	0
Srebf2_38	2853857491	0	0	0	0	0	0	0	0	0	0	2192157491	0	0	3278057491
Hes1_39	0.284157491	0	0	0	2830557491	0	0	0	0	0	0	0	0	0	0.134457491
Hes7_40	0.410157491	0	0	0	1409357491	0	0	0	0	0	0.901557491	0	0	0	0
Tcfeb_41	8072957491	0	1294457491	0.098357491	2497257491	1657757491	3578857491	0	2282257491	0.050957491	0	1246785749	0	0	4445757491
Bhlhe22_42	0	0	0	0	0	0.654357491	0	0	0	0	0	0	0	0	0
Msc_43	0	0	0	2756157491	0	0	0	0	0	0	0	0	0	0	0
Npas2_44	0	0	2071357491	0	2784757491	0	0.085757491	0	0	0	0	0.507657491	0	0	0.584157491
Myog_45	1281315749	0	1278285749	1060350575	6894357491	0	0.185757491	0	5256657491	1523757491	0	2364657491	0	0	2834957491
Usf1_46	8706457491	0	2070657491	0	1825757491	1211757491	2409357491	0	2117857491	0	0	1395425749	0	0.089457491	5764257491
Ptf1a_47	0.897657491	0	2701357491	6838357491	1869157491	0	0.883257491	0	0	0	0	1787457491	0	0	0
Sohlh2_48	0	0	0	0	0.932657491	0	0	0	0	0	0	0	0	0	0
Neurog2_49	0	0	0	0	0	2203057491	0	0	0	0	0	0	0	0	0
Mycl1_50	1547757491	0	2386957491	0	1798357491	0	1123457491	0	2222257491	0	0	2968757491	0	0.109657491	1358157491
Hes2_51	0	0	0	0	0	0	1809157491	0	0.804157491	0	0	1020557491	0	0	1683057491
Clock_52	0	0	2619557491	0	3104657491	0	2954357491	0.100557491	1668957491	0	0	0	0	0	2504757491
Tcfec_53	6333957491	0	1108957491	0	2104157491	1156957491	3483357491	0	2610557491	0.004857491	0	1639915749	0	0	4018457491
Figla_54	2840757491	0	1948355749	1124715749	1626435749	0	0	0	0	0	0	0	0	0	0
Bhlhe40_55	2466957491	0	0	0	1519257491	0	1732757491	0	0	0	0	1251365749	0	0	2219257491
Bhlhe41_56	3144757491	0	0.001257491	0	2537657491	0	2959357491	0	0.497957491	0	0	5918657491	0	0	1950457491
Mesp2_57	1433935749	0	1091395749	3306855749	1159885749	0	0	0	0	0	0	0	0	0	2237157491
Mesp1_58	1433935749	0	1091395749	3306855749	1159885749	0	0	0	0	0	0	0	0	0	2237157491
Tcf12_59	1057405749	0	2067435749	3735015749	1605645749	0	0	0	0	0	0	0	0	0	1385357491
Heyl_60	0.273857491	0	1310857491	0	2157857491	0	2697957491	0	0	0	0	2382657491	0	0	1210857491
Scx_61	0	0	0	3962657491	0	0	0	0	0	0	0	0	0	0	0
Mitf_62	7765957491	0	1527157491	0	2707957491	1504357491	4511057491	0	2804557491	0	0	1462025749	0	0	4189457491
Myf6_63	4158757491	0	1395257491	1731995749	0.076757491	0	0	0	0	0	0	0	0	0	0.932657491
Atoh7_64	0	0	0	0	0	0.658957491	0	0	0	0	0	0	0	0	0
Mycn_65	1547757491	0	2386957491	0	1798357491	0	1123457491	0	2222257491	0	0	2968757491	0	0.109657491	1358157491
Hand1_66	0	0	0.494057491	1223057491	1054757491	0	0	0	0	0	0	0	0.266357491	0	0
Atoh8_67	4138657491	0	0.550357491	2526845749	2381757491	0	0	0	0	0	0	0	0	0	0
Hand2_68	0	0	0.494057491	1223057491	1054757491	0	0	0	0	0	0	0	0.266357491	0	0
Neurod2_69	0	0	0	0	0	0.093157491	0	0	0	0	0	0	0	0	0
Mlxip_70	0	0	0	0	0.920557491	0	0.581557491	0	0.978957491	0	0	2180157491	0	0	2713757491
Tcfl5_71	2924457491	0	0	0	0.741457491	0	0.037757491	0	0	0	1853157491	3044057491	0	0	0
Olig2_72	0	0	0	0	0	0	0	0	0	0	0	0	0	0	0
Hey1_73	0.273857491	0	1310857491	0	2157857491	0	2697957491	0	0	0	0	2382657491	0	0	1210857491
Id1_74	0.375557491	0	0.896957491	0	0.892657491	0	1417357491	0	0	0	0	1083185749	0	0.587357491	1701657491
Neurog3_75	0	0	0	0	0	2203057491	0	0	0	0	0	0	0	0	0
Mycs_76	1547757491	0	2386957491	0	1798357491	0	1123457491	0	2222257491	0	0	2968757491	0	0.109657491	1358157491
Bhlhe23_77	0	0	0	0	0	0.351157491	0	0	0	0	0	0	0	0	0
Olig3_78	0	0	0	0	0	0	0	0	0	0	0	0	0	0.924557491	0
Tcf21_79	0.000957491	0	0	2643335749	0	0	0	0	0	0	0	0	0	0	0
Npas4_80	0	0	0	1146057491	0.634857491	1025457491	0	0	0.741057491	0	0	0	0	0	0.863357491
Olig1_81	0	0	0	0	0	0.836857491	0	0	0	0	0	0	0	0	0
Ferd3l_82	1289175749	0	1330957491	5299155749	0.402857491	0	0	0	4913857491	0	0	0	0	0	3333157491
Hes5_83	0	0	1824857491	0	3201757491	0	1712257491	0	0.687157491	0	0	0	0	0	2025057491
Nhlh2_84	9545557491	0	6229457491	8191215749	4085857491	0	0	0	3594857491	1051357491	0	2816757491	0	0	3768357491
Neurog1_85	0	0	0	0	0	0	0	0	0	0	0	0	0	0	0
Nhlh1_86	5397157491	0	8725257491	5379065749	5913157491	0	1874957491	0	7943757491	1149357491	0	0	0	0	4728057491
Bhlha15_87	0	0	0	0	0	0.471357491	0	0	0	0	0	0	0	0	0
Tcf4_88	7463757491	0	2315715749	3497795749	2097295749	0	0	0	0	0	0	0	0	0	1735857491
Arntl_89	5332457491	0	0.983257491	0	2843257491	0	1880157491	0	0.359357491	0	0	1484465749	0	0	4238757491
Ebf1_90	4447557491	0	1212557491	0	8268657491	0	0	0	0	0	0	0.136857491	0	0	0
Max_91	0.072657491	0	3888457491	0.769957491	2353457491	0	1611357491	0	0.555757491	0	0	2371557491	0	0.739257491	0.709057491
Sim2_92	0	0	0	0	1245057491	0.189857491	0	0	0.273157491	0	0	0	0	0	0.669557491
Tcf15_93	0	0	0	3962657491	0	0	0	0	0	0	0	0	0	0	0
Atoh1_94	0	0	0	0	0	1421357491	0	0	0	0	0	0	0	0	0
Usf2_95	9226557491	0	1988357491	0	2786257491	0.633257491	2355357491	0	2388357491	0	0	1533365749	0	0	6832157491
Mga_96	3730657491	0	6847257491	0	2883257491	0	0	0	7921715749	0.111557491	0	0	0	0	1224925749
Cebpd_97	0	0	0	0	0	1093269575	2399457491	0	0	0	0	0	0.066357491	0.234457491	0
Fosb_98	0	0	0	0	0	8777455749	3009905749	1225857491	1623805749	3642057491	0	0	0.186157491	0	1647157491
Hlf_99	0	0	0	0	0	3643457491	0	0	0	0	0.304957491	0	0.177257491	2454657491	0
Atf6b_100	6372457491	0	0	4865457491	0	3769557491	4015557491	0.450057491	1117915749	0.822757491	0	0	0	0	1131225749
Nfe2l2_101	0	0	0	0	0	5631775749	1377105749	0	2875157491	5836257491	0	2122757491	0	0	0
Mafk_102	0	0	0	0	0	0	0	0	0	0	0	5853457491	0	0	0
Xbp1_103	9635257491	0	0	1769557491	0	1047035749	4372257491	0	5254457491	0	0	0	0	0.076557491	1463065749
Fos_104	0	0	0	0	0	1570645575	4741205749	2273257491	3253945749	1299235749	0	0	0.598357491	0	0.937357491
Tef_105	0	0	0	0	0	5461057491	0	0	0	0	0	0	0	1536357491	0
Atf1_106	1467857491	0	0	0	0	1954115749	5382657491	0	3327557491	0.175557491	0	0	0	0	3776357491
Fosl1_107	0	0	0	0	0	5474685749	1076615749	0	4478357491	2047857491	0	0	0	0	1196657491
Bach1_108	0	0	0	0	0	1142121575	3586875749	0.649257491	2551725749	6230257491	0	0	0.890257491	0	2656457491
Creb1_109	1580435749	0	0	4391557491	0.672957491	1572265749	1008185749	0	1771465749	0	0.185857491	0	0	0	2904195749
Atf3_110	7583557491	0	0	2406057491	0	1719995749	9571557491	0	1358285749	0	0	0	0	0	1430055749
Atf6_111	6372457491	0	0	4865457491	0	3769557491	4015557491	0.450057491	1117915749	0.822757491	0	0	0	0	1131225749
Atf2_112	1119575749	0	0	2019457491	0	1963975749	1552565749	0.017557491	1161385749	0	0	0	0	0	1931505749
Fosl2_113	3257857491	0	0	0	0	1355655749	5318357491	0	3781057491	0.540957491	0	0	0	0	8231157491
Jdp2_114	1121185749	0	0	2530157491	0	2351615749	1070265749	0	1346175749	0	0	0	0	0	2272005749
Cebpa_115	0	0	0	0	0	4061035749	0	0	0	0	0	0	0	1569257491	0
Creb3l3_116	2108255749	0	0.805657491	3648857491	4728257491	2002055749	1759195749	3125057491	2590925749	1078357491	0.245657491	0	0	0	1725585749
Nfe2l1_117	0	0	0	0	0	1861857491	0.583057491	0	0	0.875157491	0	0	3616257491	0.506457491	0
Creb3l2_118	8378657491	0	0	0	1205757491	0	2623257491	0	1865857491	0	0	2991757491	0	0	3250557491
Bach2_119	0	0	0	0.476257491	0	1103098575	3562225749	0.248357491	2580745749	7846857491	0	0	0	0	4457757491
Nrl_120	0	0	0	0	0	0	1975757491	0	0	0	0.530457491	5349145749	0.759457491	0	0
Atf4_121	0	0	0	0	0	1780657491	0	0.549657491	0	0	0	0	0	0.847757491	0
Crebzf_122	0	0	0	0	0	0	0	0	0	0	0	0	0	0	0
Mafg_123	0	0	0	0	0	0	1708957491	0	0	0.048257491	0	4149815749	0.749557491	0	0
Atf7_124	1830345749	0	0	2177957491	0.062657491	2546965749	1795515749	0.759957491	1981235749	0.167657491	0	0	0	0	2148905749
Cebpe_125	0	0	0	0	0	1701125749	0	0	0	0	0	0	0	0	0
Jun_126	0	0	0	0	0	4198355749	1287025749	0	3270857491	0.890957491	0	0	0	0	1225857491
Junb_127	0	0	0	0	0	8634385749	2795535749	0	1700805749	2132857491	0	0	1606457491	0	4012757491
X9430076C15Rik_128	1420765749	0	0.060457491	2241157491	4677057491	2405185749	2320125749	1386457491	1570335749	0.573757491	0.349357491	0	0	0	1578055749
Cebpg_129	0	0	0	0	0	1049467575	1188157491	0	0	0	0	0	0	0	0
Cebpb_130	0	0	0	0	0	1093269575	2399457491	0	0	0	0	0	0.066357491	0.234457491	0
Nfil3_131	0	0	0	0	0	6893357491	0.127457491	0	0	0	0	0	0	1437157491	0
Nfe2_132	0	0	0	0	0	5278065749	1785865749	0	3948357491	2551157491	0	2095157491	0.025457491	0	0
Dbp_133	0	0	0	0	0	1248257491	0	0	0	0	0	0	0	7799357491	0
Crem_134	1051575749	0	0	4948257491	0.227657491	1693985749	9268957491	0	1210425749	0.073457491	0	0	0	0	2178525749
Jund_135	0	0	0	0	0	1107181575	3110265749	0	2943645749	1112795749	0	0	0.473857491	0	6164257491
Mafb_136	0	0	0	0	0	0	5660557491	0.070957491	0.052957491	0.162857491	0.288457491	5312215749	0.540757491	0	0
Nfil3_137	0	0	0	0	0	0	0	0	0	0	0	0	0	0	0
Nfil3_138	0	0	0	0	0	4898257491	0	0	0	0	0	0	0	7012557491	0
Zeb1_139	0	0	3488525749	0.678357491	3999045749	0	0	0	0	0.088457491	0	0	0	0	0.256957491
Zscan4_140	0	0	0	0	0	0	0	0.169357491	0	0	0	0	0	0	0
Bcl6b_141	0	0	0	0	0	0	0	0	0	0	0	0	0	0	0
Sp1_142	3675105749	0	5287957491	0	1299055749	0	1311457491	0	1898805749	0	3552357491	0	0	0	2573065749
Klf4_143	1013958575	0	6424557491	1078425749	1066985749	1136321575	9569457491	2828657491	6992245749	1141257491	0.066557491	0	0	0	7820195749
Plag1_144	1303975749	0	8873657491	2667757491	1475245749	0.596557491	0.506257491	1417757491	8648357491	0.068857491	0.406157491	0	0	0	3871357491
Klf5_145	1139471575	0	4637395749	1000205749	5169665749	6989195749	1027485749	0.956557491	6047015749	0.290857491	2019157491	0	0	0	7328355749
Ctcf_146	0	0	0	0	0	0	0	0	0	0	0	0	0	0	0
Snai3_147	2077057491	0	0	3223057491	0	0	0	0	2017357491	0	0	0	0	1566857491	1244357491
Glis2_148	2324057491	0	1356457491	0.225757491	2831557491	0	0	0.238457491	0.060857491	0	0	0	0	0	0
Ikzf1_149	0	0	1383757491	0	1855657491	0	0	0	0	0	0	0	0.742757491	0.516757491	0
Sp2_150	5799785749	0	5651765749	3369557491	7211405749	1220275749	2619157491	0	2925765749	0	1902957491	0	0	0	4333715749
Zbtb4_151	4174557491	0	0	1665757491	0	0.717557491	0.068257491	0	6461757491	0	0.653357491	0	0	0	2869557491
Plagl1_152	1162185749	0	4276057491	4630957491	8412057491	2776357491	1767057491	0.873057491	1654045749	0	0.538557491	0	0	0	8866857491
Patz1_153	5238975749	0	5242055749	4258057491	5536705749	1588105749	3897257491	0	2600875749	0	0.086257491	0	0	0	3893125749
Yy1_154	0.244057491	0	0	0	0	1438857491	0	0	0	0	0.316057491	0	0	0	0
Gli3_155	7501957491	0	0.934857491	7151257491	2891157491	5360757491	1251757491	0	1649145749	0	0	0	0	0	3878357491
Zkscan3_156	0	0	0	0	0.749957491	0	0	0.064457491	0	0	0	0	0	0.065057491	0
Hivep1_157	1980955749	0	4512757491	1312657491	4675057491	8520557491	1537975749	0	2695657491	0	0	0.036357491	0	0	4346257491
Zfp369_158	0	0	0	1995457491	0	3484157491	0	0	0.531857491	0	0	0	0	0	0
Fezf2_159	0	0	0	0	0	0	0	0	0	0	0	0	0	0	0
Zfp187_160	0	0	0.457257491	0	0	0	0	0	0	0	0	0	0.878357491	2332257491	0
Osr2_161	0.862957491	0	0	0.461457491	0	0.973157491	0	0	0.221757491	0	0	0	0	0	0
Bcl6_162	0	0	5414457491	0	4564557491	0	0	0	0	0	0	0	0	0	0
Zfp263_163	0	0	1300357491	0.449657491	2981257491	0	0	0	0	0	0	0.325857491	0	0	0
Zscan10_164	0	0	4267657491	0	2069757491	0	1134357491	0	0	0	0	0	0	0	0
Zfp523_165	0	0	7294657491	0	4856857491	0	1420057491	0	0	0	0	0	0.184357491	0	0
Ovol1_166	0	0	0	0	0	0	0	0	0	0	0	0	0.233657491	1451057491	0
Sp4_167	4681255749	0	2521465749	0.962057491	2447635749	1226857491	1017757491	0	1821585749	0	1523357491	0	0	0	3370875749
Zfp711_168	4381657491	0	2882857491	2764557491	5987257491	2905257491	1790657491	0.396757491	5270257491	0.988957491	0	0	0	0	2540157491
Zfp202_169	7173657491	0	7334757491	1333557491	7060757491	0	0	0	5000857491	0	0	0	0	0	1886157491
Zfp282_170	0	0	0	0	0	3965657491	0	0	0	0	0	0	0	0	0
Klf7_171	7055525749	0	0.207557491	8723157491	5732757491	5226845749	2734157491	3862057491	3827365749	0.589057491	1049057491	0	0	0	4284235749
Gfi1b_172	0	0	0	0.612457491	0	0	0	0	0	0	0	0	0.027957491	0	1103557491
Mecom_173	0	0	0	0	0	0	0	0	0	0	0	0	0	0	0
Zbtb7b_174	4122257491	0	0.707057491	0.369257491	3444857491	0	0	0	2876457491	0	0	0	0	0	4688057491
Mtf1_175	0	0	0	0.405057491	0.045557491	0	0	0	0	0	0	0	0	0	4354957491
Zbtb49_176	0.550857491	0	2187257491	0	6546257491	0	0	0	0	0	0	0.799157491	0.332157491	0	0
Fezf1_177	0	0	0	0	0	0	0	0	0	0	0	0	0	0	0
Zkscan1_178	0	0	0	0	0	0	0	0	0	0.019357491	0	0	0.106857491	0	0
Mzf1_179	1390057491	0	0	0	0	0	1306157491	0	0	0	0	0	0	0	0
Zfp300_180	0	0	0	0	0	0	0	0	0	0	0	0	0	0	0
Zic1_181	0	0	5115457491	1076057491	6733557491	0	0	0	1345157491	0.403657491	0	1880957491	0	0	2394957491
Zbtb1_182	0	0	0	0	1774857491	0	0	0	0	0	0	0	0	0	0
Egr3_183	2914015749	0	0.684957491	0.025557491	3179357491	2260257491	2587557491	0	1827375749	0	3034857491	0	0	0	2465755749
Klf9_184	0.828557491	0	0	0	0	0.549257491	1808757491	0	2172157491	0	0	0	0	0	0
Glis1_185	4384757491	0	0	0	0	0	0.251557491	0	3203957491	0	0	0	0	0	1973057491
Prdm4_186	0.485557491	0	2971157491	0	1652957491	0	0	0	0	0	0	0	0	0	0
Zic4_187	0	0	0.021657491	0.886657491	3757057491	0	0	0	0	0.361357491	0	0	0	0	0
Egr2_188	1252345749	0	0	0.400757491	1613957491	0	0.245357491	0	1349585749	0	3100757491	0	0	0	1779345749
Prdm1_189	3229405749	0	0	5914857491	0	4596505749	1799365749	0	4395457491	0	0	0	0	0	4788057491
Egr1_190	2455505749	0	2007657491	0	7865057491	0	1521957491	0	1105435749	0	1368357491	0	0	0	1651985749
Sp6_191	4441205749	0	7646357491	0.559457491	1292675749	5034257491	1780457491	0.594557491	2567905749	0.774457491	0.232957491	0	0	0	2658215749
Rreb1_192	3633205749	0	1427257491	1359375749	1883557491	7666857491	1125257491	0	3213515749	0	0	0	0	0	4884145749
Zfp281_193	4962075749	0	7153915749	4146157491	5597135749	1810405749	4599857491	0	2260485749	0	0.186957491	0	0	0	3592405749
Klf8_194	7978115749	0	0.182957491	1005485749	3430557491	8860405749	4654157491	3704857491	5785185749	0.778557491	0.494057491	0	0	0	5994785749
Zic5_195	5653357491	0	1242857491	0.757657491	3435557491	0	0	0	2382157491	0	0.186957491	0	0	0	1253857491
Zfp410_196	0	0	0	0.290057491	0	0.222157491	0	0	0	0.009557491	0	0	0	0	0
Snai1_197	2077057491	0	0	3223057491	0	0	0	0	2017357491	0	0	0	0	1566857491	1244357491
Hic1_198	0	0	0.656057491	0.661057491	2156857491	0	0	0	0	0	0	0.624657491	0.554457491	0	0
Zfp784_199	0.491257491	0	0.213457491	0	0	0	0	0	0	0	0	0	0	0	0.332257491
Zfp3_200	3973057491	0	0	0	0	0	0	0	0	0	0	0	0	0	3260157491
Dnajc21_201	0.566957491	0	4516657491	1820357491	5004557491	3786457491	0.700257491	0.368457491	1261857491	0	0	0	0	0	1614457491
Zfp354c_202	0	0	0	0	0	0	0	0	0	0	0	0.125157491	0	0	0
Zfp691_203	0	0	0	0	0	0	0	0	0	0	0	1297757491	0	0	0
Zfp740_204	2941345749	0	3445755749	0.900257491	3696625749	3476557491	0.260257491	0	1353815749	0	0.881957491	0	0	0	2004695749
Scrt1_205	4118557491	0	3216457491	3202457491	0.737657491	0	0	0	0	0	0	0	0	0	1296557491
Osr1_206	0.314857491	0	0	1190757491	0	0.880057491	0	0	0.035157491	0	0	0	0	0	0
Sp8_207	5920335749	0	2183875749	4145757491	2558255749	1548755749	1467057491	0.735957491	3449075749	0	0	0	0	0	3905165749
Zfa_208	1447257491	0	1318355749	0	2963775749	0	0	0	8056357491	0.192557491	0	0	0	0	0.333657491
Zfp161_209	4477057491	0	0	0	1117257491	0	0	0	0	0	0	0	0	0	1385157491
Zbtb12_210	0	0	0	0	0	0	0	0	0	0	0	0	0.419957491	0	0
Hic2_211	0	0	0	3082257491	2011057491	0	0	0	0	0	0	2284057491	0	0	0
Zfp524_212	1084257491	0	0	0.770557491	0	0	0	0	0.608157491	0	0	1964857491	3517857491	0	2178557491
Zfy1_213	1447257491	0	1318355749	0	2963775749	0	0	0	8056357491	0.192557491	0	0	0	0	0.333657491
Klf1_214	7804035749	0	0	1066515749	1536057491	1422324575	8705757491	1751257491	6564915749	2665657491	0	0	0	0	5822055749
Zscan4c_215	0	0	0	0.632857491	0	0	0	0.096657491	0	0	0	0	0	0	0
Zkscan4_216	0	0	0	0	0.749957491	0	0	0.064457491	0	0	0	0	0	0.065057491	0
Zkscan5_217	1052936575	0	0	9805157491	0	1935435575	5147205749	0.217757491	2119405749	0.124457491	0	0	0	0	2458585749
Zfp105_218	0	0	0	0	0	0	0	0	0	0	0	0	0	2340457491	0
Zfp110_219	0	0	0	1995457491	0	3484157491	0	0	0.531857491	0	0	0	0	0	0
Zfp637_220	0	0	0	0	0	0	0	0	0	0	0	0	0	0	0
Scrt2_221	2933357491	0	4092957491	3859657491	0.980757491	0	0	0	0	0	0	0	0	0	0.320357491
Sp7_222	5920335749	0	2183875749	4145757491	2558255749	1548755749	1467057491	0.735957491	3449075749	0	0	0	0	0	3905165749
Zfp128_223	0	0	0	0	0	0	0	0	0.275757491	0	0.143957491	0	0	0	0
Zfp143_224	1528857491	0	0.103357491	0.139957491	0	1103957491	0.628857491	0.131557491	1237357491	0	0	0.123057491	0.084257491	0	0.586657491
Zic2_225	2826057491	0	4858157491	2347357491	6979857491	0	0	0.394057491	2363157491	0	0	0.347457491	0	0	1689357491
Zscan20_226	0	0	0	0	0	0	0	0	0	0	0	0	0	0	0.666957491
Zfp238_227	0	0	0	2010445749	0	0	0	0	0	0	0	0	0	0	0
Zbtb6_228	0	0	0	0	2212057491	0	0	0	0	0	0	0	0	0	0
Zic3_229	0	0	8555657491	1393557491	1159985749	0	0	0.860157491	2667457491	0	0	2632457491	0	0	2824157491
Insm1_230	6150857491	0	8698657491	3718457491	1368825749	0.224757491	0.380557491	0	3184357491	0	0	0	0	0	1712657491
Sp9_231	5920335749	0	2183875749	4145757491	2558255749	1548755749	1467057491	0.735957491	3449075749	0	0	0	0	0	3905165749
Zscan4ps2_232	0	0	0	0.632857491	0	0	0	0.096657491	0	0	0	0	0	0	0
Zscan4f_233	0	0	0	0.632857491	0	0	0	0.096657491	0	0	0	0	0	0	0
Egr4_234	2017025749	0	0	0	0.901157491	2188257491	3083757491	0	9192557491	0.196257491	1423057491	0	0	0	1458945749
Zbtb3_235	0	0	0	0.778157491	0	0	0	0	0.505257491	0.460157491	0	0.738857491	0	0	0
Klf12_236	7404735749	0	0	8572957491	2620157491	6841475749	3208757491	4627657491	4412035749	0.947957491	0.065557491	0	0	0	4708225749
Klf14_237	3444165749	0	4732257491	2108157491	8085757491	5529857491	1010057491	1482957491	1998575749	0.656257491	0.020257491	0	0	0	1924115749
Sp5_238	4441205749	0	7646357491	0.559457491	1292675749	5034257491	1780457491	0.594557491	2567905749	0.774457491	0.232957491	0	0	0	2658215749
Zfp652_239	0	0	0.832557491	0	0	0	0	0	0	0	0	0	0	2202257491	0
Zfx_240	0	0	0.001957491	0	0	3446657491	0.055157491	0	2016657491	0	0	0	0	0	0
Myt1l_241	0	0	0	0	0	0	0	0	0	0	0	0	0.158257491	0.200857491	0
Nfya_242	3488957491	0	8347457491	0	2017457491	0	0	0	1987957491	0	0	1381357491	0	0	2152057491
Cenpb_243	0	0	0	0	0	0	0	0	0	0	0	0	0	0	0
Cux2_244	0	0	0	0	0	0	0	0	0	0	0.723557491	0	0	0	0
Onecut3_245	0	0	0	0	0	0	0	0	0	0	0	0	0	2007557491	0
Lin54_246	0	0	0.048157491	0	0	0	0	0	0	0	0	0	0	0	0
Cxxc1_247	1223257491	0	1080357491	0	0	0	0	0	1392157491	0	0	0	0	0	0.989457491
Mbd1_248	3120857491	0	0	0	0	0	0	0	0	0	0	0	0	0.400257491	1166757491
Kdm2b_249	0	0	0	0	0	0	0	0	0	0	0	0	0	0	0
Dmrtc2_250	0	0	0	0	0	0	0	0	0	0	0	0	0	0	0
Dmrt1_251	0	0	0	0	0	0	0	0	0	0	0.630057491	0	0	0	0
Dmrt3_252	0	0	0	0	0	0	0	0	0	0	0.767957491	0	0	0	0
Dmrta1_253	0	0	0	0	0	0	0	0	0	0	0	0	0	1202357491	0
Dmrt2_254	0	0	0	0	0	0	0	0	0	0	0	0	0	1101657491	0
Tfdp2_255	0.173857491	0	0	0	0.521457491	0	0	0	0	0	1528857491	0	0	0	1233257491
Tfdp1_256	0.173857491	0	0	0	0.521457491	0	0	0	0	0	1528857491	0	0	0	1233257491
E2f4_257	1041757491	0	0	0	2574557491	0	0	0	3435457491	0	4323357491	0	0	0	1452657491
E2f3_258	0	0	0	0	0	0	0	0	0	0	0	0	0	0	0
E2f2_259	0	0	0	0	0	0	0	0	0	0	0	0	0	0	0
E2f7_260	0	0	0.543657491	0	0	0	0	0	0	0	0	0	0	0	0
E2f1_261	2324157491	0	0	0	4706757491	0	0	0	3925057491	0	2258057491	0	0	0	2321957491
E2f5_262	0.807757491	0	0	0	0	0	0	0	1460157491	0	0	0	0	0	1351457491
E2f8_263	0	0	1552357491	0	0	0	0	0	0	0	0	0	0	0	0
E2f6_264	3580457491	0	1097565749	0	2435875749	4898557491	2849257491	0	2304757491	0	1906957491	0	0	0	6245857491
Sfpi1_265	6905583575	0	0	5973445749	0	2412422157	3663765575	4865957491	2575675749	0	0	0	0	0	3298265749
Elf3_266	3126330575	0	0	1817265749	0	8035187575	1267803575	3126357491	6631995749	2142157491	0	0	0	0	7611135749
Etv3_267	1083444575	0	0	3601257491	0	1297186575	2397715749	0.997557491	9094285749	0.232357491	0	0	0	0	1109067575
Etv1_268	3819715749	0	0	0.374557491	0	2585905749	5242057491	0	5164315749	0	0	0	0	0	4558615749
Spic_269	4331770575	0	0	3563695749	0	1431380257	2214218575	2861657491	3029765749	0.731457491	0	0	0	0	4637485749
Etv2_270	1578090575	0	0	4861357491	0	1708184575	3231715749	0	1702278575	0	0	0	0	0	2019576575
Spib_271	2140835575	0	0	3032335749	0	7205201575	1384743575	2040157491	1583215749	0	0	0	0	0	2473145749
Elk3_272	4543395749	0	0	0.853657491	0	3173345749	6400357491	0	4997345749	0	0	0	0	0	4770315749
Gabpa_273	1226420575	0	0	4966057491	0	1464091575	2404985749	0.897857491	1368973575	0	0	0	0	0	1327607575
Elk1_274	4207425749	0	0	0.568157491	0	3180645749	6730857491	0	4692605749	0	0	0	0	0	4463435749
Ehf_275	3389681575	0	0	2478175749	0	8936937575	1442014575	3829657491	7829715749	3571257491	0	0	0	0	8886755749
Etv5_276	3917315749	0	0	0.606557491	0	2680525749	5395157491	0	5080705749	0	0	0	0	0	4251455749
Fli1_277	1634176575	0	0	7694657491	0	1801235575	3151555749	0.635257491	1955146575	0	0	0	0	0	2046465575
Etv4_278	4136205749	0	0	0.609757491	0	2780535749	6616157491	0	5543745749	0	0	0	0	0	4273165749
Spdef_279	1395985749	0	0	0.027557491	0	1017835749	1606057491	0	2262985749	0	0	0	0	0	2288735749
Elk4_280	4103415749	0	0	1673957491	0	2920825749	7401457491	0	4725965749	0	0	0	0	0	3979765749
Elf5_281	3490594575	0	0	2285025749	0	9603300575	1474660575	4044857491	7733745749	4901857491	0	0	0	0	8413965749
Etv6_282	2738107575	0	0	1328265749	0	4721004575	7529645749	1743357491	9705015749	1119757491	0	0	0	0	1143971575
Elf4_283	1103955575	0	0	3218057491	0	1864987575	3060685749	1056757491	9346365749	2464557491	0	0	0	0	1064209575
Ets1_284	1618470575	0	0	6974457491	0	1778183575	2949515749	0.527857491	2207362575	0	0	0	0	0	2134942575
Elf1_285	4761328575	0	0	3439535749	0	1226061157	2140726575	1848457491	2729703575	0.021357491	0	0	0	0	2776347575
Elf2_286	1000966575	0	0	3057157491	0	1706057575	2509055749	1604557491	6121375749	1216157491	0	0	0	0	7350545749
Erg_287	1681145575	0	0	7252857491	0	1870592575	3284585749	0.544257491	2109524575	0	0	0	0	0	2154953575
Erf_288	1614591575	0	0	5696157491	0	1692288575	2449465749	0	2204369575	0	0	0	0	0	2100691575
ENSMUSG00000044690_289	3917315749	0	0	0.606557491	0	2680525749	5395157491	0	5080705749	0	0	0	0	0	4251455749
Gm5454_290	3952865749	0	0	0.309757491	0	2541635749	6826557491	0	5584205749	0	0	0	0	0	4256585749
Fev_291	1297138575	0	0	4253757491	0	1061664575	1922245749	0	1440165575	0	0	0	0	0	1339644575
Gm4881_292	1226420575	0	0	4966057491	0	1464091575	2404985749	0.897857491	1368973575	0	0	0	0	0	1327607575
Gm4881_293	5272634575	0	0	4338355749	0	9079148575	1660372575	2434257491	5176564575	0.283257491	0	0	0	0	5358490575
Gm4881_294	7184457491	0	0	0	0	2427557491	0.671357491	0	1663875749	0	0	0	0	0	9313957491
Gm4881_295	0	0	0	0	0	0	0	0	0	0	0	0	0	0	0
Gm4881_296	1500727575	0	0	2435357491	0	2450517575	4117955749	0	1901390575	3003657491	0	0	0	0	2142679575
Gm4881_297	2212637575	0	0	1706565749	0	4087731575	8327925749	1338557491	2267087575	0	0	0	0	0	2130529575
Foxj2_298	0	0	0.252957491	0	0.349257491	0	0	0	0	0	0	0	0	0	0
Foxg1_299	0	0	0.177057491	0	0	0	0	0	0	0	0	0	0	0	0
Foxp4_300	0	0	0.252957491	0	0.349257491	0	0	0	0	0	0	0	0	0	0
Foxp2_301	0	0	0.252957491	0	0.349257491	0	0	0	0	0	0	0	0	0	0
Foxp1_302	0	0	3520057491	0	1600557491	0	0	0	0	0	0	0	0	1567757491	0
Foxj3_303	0	0	1282057491	0	0.441057491	0	0	0	0	0	0	0	0	0	0
Foxh1_304	0	0	0	0	0	0	0	0	0	0	0	0	0	0	0
Foxj1_305	0	0	0	0	0	0	0	0	0	0	0	0	0	0	0
Foxa1_306	0	0	0.498457491	0	0	0	0	0	0	0	0	0	0	0	0
Foxa2_307	0	0	0.532357491	0	0	0	0	0	0	0	0	0	0	2894057491	0
Foxf2_308	0	0	0.125457491	0	0.472557491	0	0	0	0	0	0	0	0	0	0
Foxq1_309	0	0	0	0	0	0	0	0	0	0	0	0	0	0.600157491	0
Foxk2_310	0	0	0.252957491	0	0.349257491	0	0	0	0	0	0	0	0	0	0
Foxp3_311	0	0	0.252957491	0	0.349257491	0	0	0	0	0	0	0	0	0	0
Foxf1a_312	0	0	0.125457491	0	0.472557491	0	0	0	0	0	0	0	0	0	0
Foxo4_313	0	0	0.115957491	0	0	0	0	0	0	0	0	0	0	0.129457491	0
Foxo1_314	8191557491	0	3184757491	0	1772657491	2546257491	0.944457491	0.038157491	0	0.649857491	0	0.308057491	0	0	7111157491
Foxe3_315	0	0	9828657491	0	3356857491	0	0	0	0	0	0	0	0.057757491	0	0.776357491
Foxc2_316	0	0	0	0	0	0	0	0	0	0	0	0	0	0.181757491	0
Foxi1_317	0	0	0	0	0	0	0	0	0	0	0	0	0	1729957491	0
Foxi2_318	0	0	0	0	0	0	0	0	0	0	0	0	0	1729957491	0
Foxo3_319	0	0	0.252957491	0	0.349257491	0	0	0	0	0	0	0	0	0	0
Foxc1_320	0	0	0	0	0	0	0	0	0	0	0	0	0	0	0
Foxo6_321	0	0	0.103657491	0	0	0	0	0	0	0	0	0	0	0.192457491	0
Foxd2_322	0	0	9828657491	0	3356857491	0	0	0	0	0	0	0	0.057757491	0	0.776357491
Foxi3_323	0	0	0	0	0	0	0	0	0	0	0	0	0	1729957491	0
Foxk1_324	0	0	0.252957491	0	0.349257491	0	0	0	0	0	0	0	0	0	0
Foxb2_325	0	0	0	0	0	0	0	0	0	0	0	0	0	0	0
Foxb1_326	0	0	0	0	0	0	0	0	0	0	0	0	0	0	0
Foxd3_327	0	0	0	0	0	0	0	0	0	0	0	0	0	0.859457491	0
Foxe1_328	0	0	0	0	0	0	0	0	0	0	0	0	0	0.859457491	0
Foxs1_329	0	0	0	0	0	0	0	0	0	0	0	0	0	0.181757491	0
Foxd1_330	0	0	0.196157491	0	0.879057491	0	0	0	0	0	0	0	0	0.202157491	0
Gm5294_331	0	0	1257825749	0	3830157491	0	0	0	0	0.587257491	0	0	0.015857491	0	3315357491
Gm5294_332	0	0	0	0	0	0	0	0	0	0	0	0	0	0	0
Gm5294_333	0	0	0	0	0	0	0	0	0	0	0	0	0	1257157491	0
Gm5294_334	0	0	0.196157491	0	0.879057491	0	0	0	0	0	0	0	0	0.202157491	0
Gm5294_335	0	0	0	0	0	0	0	0	0	0	0	0	0	0	0
Gm5294_336	0	0	0	0	0	0	0	0	0	0	0	0	0	0.940557491	0
Gm5294_337	0	0	0	0	0	0	0	0	0	0	0	0	0	0.442857491	0
Gm5294_338	0	0	0	0	0	0	0	0	0	0	0	0	0.174357491	6439357491	0
Gm5294_339	0	0	0.737757491	0	0	0	0	0	0	0	0	0	0	1326557491	0
Gm5294_340	0	0	0	0	0	0	0	0	0	0	0	0	0	1729957491	0
Gm5294_341	0	0	0	0	0	0	0	0	0	0	0	0	0	0.859457491	0
Gm5294_342	0	0	0	0	0	0	0	0	0	0	0	0	0	0	0
Gm5294_343	0	0	0	0	0	0	0	0	0	0	0	0	0	2065157491	0
Gm5294_344	0	0	0	0	0	0	0	0	0	0	0	0	0	2214857491	0
Gm5294_345	0	0	0	0	0	0	0	0	0	0	0	0	0	0	0
Gm5294_346	0	0	0	0	0	0	0	0	0	0	0	0	0	0	0
Gm5294_347	0	0	0	0	0	0	0	0	0	0	0	0	0	3064857491	0
Gm5294_348	0	0	0	0	0	0	0	0	0	0	0	0	0	2894157491	0
Gm5294_349	0	0	0	0	0	0	0	0	0	0	0	0	0	0	0
Gm5294_350	0.578357491	0	0	0	0	8454257491	2452157491	0	0.910757491	0	0	0	0	0	0.655657491
Gm5294_351	0	0	0	0	0	0	0	0	0	0	0	0	0	0.865957491	0
Gm5294_352	0	0	0	0	0	0	0	0	0	0	0	0	0	0	0
Gm5294_353	3398357491	0	3566257491	0	0.712657491	0.090057491	0	0	1293857491	0	0	0	0	0	0.666757491
Foxl1_354	0	0	1257825749	0	3830157491	0	0	0	0	0.587257491	0	0	0.015857491	0	3315357491
Foxl1_355	0	0	0	0	0	0	0	0	0	0	0	0	0	0	0
Foxl1_356	0	0	0	0	0	0	0	0	0	0	0	0	0	1257157491	0
Foxl1_357	0	0	0	0	0	0	0	0	0	0	0	0	0	0	0
Foxl1_358	0	0	0	0	0	0	0	0	0	0	0	0	0	0.442857491	0
Foxl1_359	0	0	0.196157491	0	0.879057491	0	0	0	0	0	0	0	0	0.202157491	0
Foxl1_360	0	0	0	0	0	0	0	0	0	0	0	0	0	0.940557491	0
Foxl1_361	0	0	0	0	0	0	0	0	0	0	0	0	0	0	0
Foxl1_362	0	0	0	0	0	0	0	0	0	0	0	0	0	1729957491	0
Foxl1_363	0	0	0.737757491	0	0	0	0	0	0	0	0	0	0	1326557491	0
Foxl1_364	0	0	0	0	0	0	0	0	0	0	0	0	0.174357491	6439357491	0
Foxl1_365	0	0	0	0	0	0	0	0	0	0	0	0	0	0	0
Foxl1_366	0	0	0	0	0	0	0	0	0	0	0	0	0	0.859457491	0
Foxl1_367	0	0	0	0	0	0	0	0	0	0	0	0	0	2641357491	0
Foxl1_368	0	0	0	0	0	0	0	0	0	0	0	0	0	0	0
Foxl1_369	0	0	0	0	0	0	0	0	0	0	0	0	0	2065157491	0
Foxl1_370	0	0	0	0	0	0	0	0	0	0	0	0	0	2214857491	0
Foxl1_371	0	0	0	0	0	0	0	0	0	0	0	0	0	0	0
Foxl1_372	0	0	0	0	0	0	0	0	0	0	0	0	0	0	0
Foxl1_373	0	0	0	0	0	0	0	0	0	0	0	0	0	3064857491	0
Foxl1_374	0	0	0	0	0	0	0	0	0	0	0	0	0	1137157491	0
Foxl1_375	0	0	0	0	0	0	0	0	0	0	0	0	0	2894157491	0
Foxl1_376	0.578357491	0	0	0	0	8454257491	2452157491	0	0.910757491	0	0	0	0	0	0.655657491
Foxl1_377	0	0	0	0	0	0	0	0	0	0	0	0	0	0.865957491	0
Foxl1_378	0	0	0	0	0	0	0	0	0	0	0	0	0	0	0
Foxl1_379	3398357491	0	3566257491	0	0.712657491	0.090057491	0	0	1293857491	0	0	0	0	0	0.666757491
Foxl1_380	0	0	0	0	0	0	0	0	0	0	0	0	0	4679057491	0
Foxl1_381	0	0	0	0	0	0	0	0	0	0	0	0	0	0.652157491	0
Gata6_382	0	0	0.618157491	0	0	0	0	0	3303557491	0.406457491	0	0	0	0	4196057491
Gata2_383	0	0	0	0	0	0	0	0	3576157491	0	0	0	0	0	4916157491
Gata3_384	0.043657491	0	0	0	0	0	0	0	0.659457491	0	0	0	0	0	2418257491
Gata5_385	0.749057491	0	0	0	0	0	0	0	2082357491	1054157491	0	0	0	0	3135757491
Gata4_386	0	0	1099357491	0	0	0	0	0	1436757491	0.234657491	0	0	0	0	3331157491
Gata1_387	0	0	0	0	0	0	0	0	0.638057491	0	0	0	0	0	6779457491
Gcm1_388	0	0	2083957491	0	1405157491	0	0	0	0.874257491	0	0	0	0	0	0.476757491
Tcfcp2_389	0	0	5586657491	0	2871557491	0	0	0	0	0	0	0	0	0	0
Grhl1_390	0	0	5111555749	0	5166775749	0	0	0	0	0.947157491	0	0	0	0	0
Tcfcp2l1_391	0	0	1497375575	0	1641517575	0	0	0	0	0	0	5837857491	0	0	0
Dux_392	0	0	4390757491	0	0	0	0	0	0	0	0	0	0	0	0
Lhx2_393	0	0	2118735749	0	1851857491	0	0	0	0	0	0	0	1820057491	7827857491	0
Hoxb6_394	0	0	1356645749	0	3185557491	0	0	0	0	0	0	0	0	0	0
Hoxa10_395	0	0	1813155749	0	2993857491	0	0	0	0	0	0	0	0	0	0
Hoxa4_396	0	0	1220435749	0	0	0	0	0	0	0	0	7158357491	1796357491	1495455749	0
Sebox_397	0	0	2016055749	0	0	0	0	0	0	0	0	0.935057491	0	1090345749	0
Meox1_398	0	0	2372115749	0	1777757491	0	0	0	0	0	0	0.287157491	0.900657491	1682857491	0
Nkx21_399	0	0	6482457491	0	0.270057491	0	0	0	0	0	0	0.712257491	0.099157491	0	0
Irx2_400	0	0	0	0	0	0	0	0	0	0	0	0	0.849657491	1547457491	0
Dlx3_401	0	0	5702857491	0	0	0	0	0	0	0	0	0	0	0.607257491	0
Mnx1_402	0	0	2028045749	0	0.588157491	0	0	0	0	0	0	0	1354157491	4888057491	0
Hoxc13_403	0	0	0	0	0	0	0	0	0	0	0	0	0	0	0
Hoxc11_404	0	0	1302615749	0	3697657491	0	0	0	0	0	0	0	0	0	0
Hoxc8_405	0	0	4132565749	0	4525857491	0	0	0	0	0	0	0	0.001257491	2562457491	0
Hoxc6_406	0	0	1258305749	0	0	0	0	0	0	0	0	2541857491	0	5166957491	0
Evx2_407	0	0	4400125749	0	1012195749	0	0	0	0	0	0	0	0.603457491	1880457491	0
Hoxd13_408	0	0	0	0	0	0	0	0	0	0	0	0	0	0	0
Hoxd12_409	0	0	0.982357491	0	0	0	0	0	0	0	0	0	0	1292957491	0
Evx1_410	0	0	2929675749	0	3729257491	0	0	0	0	0	0	0	0.832257491	5895957491	0
Otx1_411	0	0	0	0	0	0	0	0	0	0	0	0	0	0.003957491	0
Rhox6_412	0	0	2118735749	0	1851857491	0	0	0	0	0	0	0	1820057491	7827857491	0
Vax1_413	0	0	3617525749	0	2439757491	0	0	0	0	0	0	0.322557491	2374857491	1036355749	0
Pknox1_414	6687557491	0	0	6496257491	0	0	0	0	5469957491	0.615857491	0	0	0	0.147157491	2185157491
Phox2a_415	0	0	2088555749	0	1415557491	0	0	0	0	0	0	0	0.521757491	8227357491	0
Pou6f1_416	0	0	1397005749	0	0	0	0	0	0	0	0	0	0.933557491	2488557491	0
Nanog_417	0	0	1023805749	0	0	0	0	0	0	0	0	0	3083657491	3380157491	0
Phox2b_418	0	0	3381545749	0	7020357491	0	0	0	0	0	0	0	0.621557491	1582357491	0
Alx3_419	0	0	2767755749	0	0	0	0	0	0	0	0	2782657491	1247857491	1140495749	0
Hoxa2_420	0	0	3137415749	0	2952857491	0	0	0	0	0	0	0.652657491	0.222257491	5750657491	0
Nkx25_421	0	0	4316957491	0	1050957491	0	0	0.050357491	0	0	0	0.278957491	0.436257491	0	0
Lhx1_422	0	0	1272665749	0	0	0	0	0	0	0	0	0.958857491	0	7172757491	0
Hoxb1_423	0	0	0	0	0	0	0	0	0	0	0	0	0	0	0
Lhx9_424	0	0	3717895749	0	2263557491	0	0	0	0	0	0	0	1444457491	8498457491	0
Meis1_425	3896857491	0	0	4436957491	0	0	0	0	3760857491	0.599957491	0	0	0	0.237157491	0.909257491
Hnf1b_426	0	0	0	0	0	0	0	0	0	0	0	0	5218657491	1057125749	0
Dlx4_427	0	0	2314657491	0	0	0	0	0	0	0	0	0	0	0.806957491	0
Hoxb9_428	0	0	1519895749	0	5126757491	0	0	0	0	0	0	0	0	0.495757491	0
Gsc_429	0	0	0	0	0	0	0	0	0	0	0	0	0	0.118757491	0
Six6_430	0.875857491	0	0	0	0	0	0	0	1394057491	0	0	0	0	0	0
Vsx2_431	0	0	2657265749	0	3831057491	0	0	0	0	0	0	0.182757491	0	2440157491	0
Barx1_432	0	0	2832315749	0	4749557491	0	0	0	0	0	0	0.492057491	1617457491	2934957491	0
Msx2_433	0	0	1233285749	0	0.502257491	0	0	0	0	0	0	0	0	0	0
Pitx1_434	0	0	0	0	0	0	0	0	0	0	0	0	0	0.128257491	0
Irx4_435	0	0	1517857491	0	0	0	0	0	0	0	0	0	0	0.319757491	0
Otp_436	0	0	1136415749	0	0	0	0	0	0	0	0	4372357491	0.411057491	1345305749	0
Otx2_437	0	0	0	0	0	0	0	0	0	0	0.192357491	0	0	0	0
Hmbox1_438	0	0	0.249857491	0	0	0	0	0	0	0	0	0.445257491	4410357491	6990957491	0
Nkx31_439	0	0	8004057491	0	1176257491	0	0	0.106457491	0	0	0	0	0.229857491	0	0
Hoxc10_440	0	0	2256115749	0	2587557491	0	0	0	0	0	0	0	0	1872157491	0
Hoxc5_441	0	0	2767755749	0	0	0	0	0	0	0	0	2782657491	1247857491	1140495749	0
Gsc2_442	0	0	0	0	0	0	0	0	0	0	0	0.882757491	0	0	0
Dlx2_443	0	0	1234565749	0	0	0	0	0	0	0	0	0	0	0.284057491	0
Esx1_444	0	0	7044257491	0	0	0	0	0	0	0	0	0.763257491	0	1435695749	0
Six2_445	0.671957491	0	0	0	0	0	0	0	0.889957491	0	0	0	0	0	0
Pou4f3_446	0	0	0.880557491	0	0	0	0	0.125257491	0	0	0	3462257491	0.515757491	1138315749	0
Rax_447	0	0	3017195749	0	3470857491	0	0	0	0	0	0	0	0.713057491	4097157491	0
Cdx1_448	0	0	2466615749	0	4446557491	0	0	0	0	0	0	0	0	1472457491	0
Hhex_449	0	0	0.075157491	0	0	0.160657491	0	0	0	0	0	0	0	0.899957491	0
Tlx1_450	0	0	5938257491	0	4168557491	0	0	0	0	0	0	0.113657491	0	0	0
Lbx1_451	0	0	1272595749	0	0	0	0	0	0	0	0	0	1429857491	4736757491	0
Pitx3_452	0	0	0	0	0	0	0	0	0	0	0	0	0	0.048757491	0
Msx3_453	0	0	1020095749	0	0	0	0	0	0	0	0	0	0	0	0
Lhx4_454	0	0	3196265749	0	2725157491	0	0	0	0	0	0	0	1560057491	4794557491	0
Prrx1_455	0	0	2088555749	0	1415557491	0	0	0	0	0	0	0	0.521757491	8227357491	0
Lmx1a_456	0	0	1390557491	0	0	0	0	0	0	0	0	0.356957491	0.229857491	8402657491	0
Barhl1_457	0	0	9540657491	0	0.500957491	0	0	0	0	0	0	0	0	1258057491	0
Lhx6_458	0	0	2023765749	0	0	0	0	0	0	0	0	0	0.565057491	5972957491	0
Lhx3_459	0	0	1822305749	0	0	0	0	0	0	0	0	0.988457491	1280657491	1027815749	0
Hoxd8_460	0	0	2509205749	0	2629257491	0	0	0	0	0	0	0	0	0.417957491	0
Meis2_461	2621457491	0	0	4146657491	0	0	0	0	3822457491	0.590257491	0	0	0	0.115657491	0.924657491
Nkx22_462	0	0	1508657491	0	0.157257491	0	0	0	0	0	0	0	0.952557491	0	0
Shox2_463	0	0	1469185749	0	0	0	0	0	0	0	0	0	1241157491	3868357491	0
Pitx2_464	0	0	0	0	0	0	0	0	0	0	0	0	0	0.286857491	0
Lhx8_465	0	0	9096557491	0	0	0	0	0	0	0	0	0	0	0	0
Dmbx1_466	0	0	0	0	0	0	0	0	0	0	0	0	0	0	0
Pax7_467	0	0	0.871857491	0	0	0	0	0.141657491	0	0	0	0	0	2467957491	0
Nkx11_468	0	0	2769605749	0	6414357491	0	0	0	0	0	0	0	0.420357491	3290157491	0
Uncx_469	0	0	7028357491	0	0	0	0	0	0	0	0	1376557491	0	1629557491	0
Hnf1a_470	0	0	0	0	0	0	0	0	0	0	0	0	3502257491	9999557491	0
Lhx5_471	0	0	1272665749	0	0	0	0	0	0	0	0	0.958857491	0	7172757491	0
Pdx1_472	0	0	9338057491	0	0.897057491	0	0	0	0	0	0	0	0	0	0
Cdx2_473	0	0	1356195749	0	2055957491	0	0	0	0	0	0	0	0	0.740157491	0
Cux1_474	0	0	0	0	0	0	0	0	0	0	0	0	0	0.076457491	0
Pax4_475	0	0	0	0	0	0	0	0	0	0	0	0	0	0	0
Nobox_476	0	0	1297195749	0	0	0	0	0	0	0	0	0	1147957491	7378757491	0
Dlx6_477	0	0	1376115749	0	0.418257491	0	0	0	0	0	0.094257491	0	0	0	0
Dlx5_478	0	0	2736295749	0	3757557491	0	0	0	0	0	0	0.999957491	0	0	0
Hoxa1_479	0	0	3028465749	0	0.925857491	0	0	0	0	0	0	1284257491	0.561557491	1075825749	0
Dbx1_480	0	0	1720295749	0	0	0	0	0	0	0	0	1793557491	0	3102857491	0
Cdx4_481	0	0	2466615749	0	4446557491	0	0	0	0	0	0	0	0	1472457491	0
Isx_482	0	0	3924465749	0	7061557491	0	0	0	0	0	0	0	0	0.707157491	0
Irx3_483	0	0	0	0	0	0	0	0	0	0	0	0	0	0	0
Irx5_484	0	0	0.568457491	0	0	0	0	0	0	0	0	0	1196757491	0	0
Irx6_485	0	0	0	0	0	0	0	0	0	0	0	0	0	3933757491	0
Pbx4_486	0	0	0	0	0	0	0	0	0	0	0	0	0	0.276057491	0
Pou2f3_487	0	0	8112057491	0	0	0	0	0	0	0	0	3041757491	1553357491	1099515749	0
Barx2_488	0	0	1205335749	0	0	0	0	0	0	0	0	0	1862357491	1741257491	0
Isl2_489	0	0	1670595749	0	0	0	0	0	0	0	0.183557491	0	1265557491	1066557491	0
Vsx1_490	0	0	2484785749	0	1706157491	0	0	0	0	0	0	0	1724457491	8029357491	0
Emx1_491	0	0	2651085749	0	4138257491	0	0	0	0	0	0	0	0.181857491	9677457491	0
Barhl2_492	0	0	7173457491	0	0	0	0	0	0	0	0	0	0.480657491	1278257491	0
Six4_493	0.179757491	0	0	0	0	0	0	0	0.429157491	0	0	0	0	0	0.155757491
Gbx2_494	0	0	2179785749	0	3436357491	0	0	0	0	0	0	0	1569657491	8470557491	0
Hdx_495	0	0	0	0	0	1376757491	0.461557491	0	0	0	0	0	0	0	0
Pbx2_496	0	0	0	0	0	0	0	0	0	0	0	0	0	0.276057491	0
Vax2_497	0	0	3224525749	0	1645557491	0	0	0	0	0	0	0.048157491	0.989757491	9504757491	0
Lbx2_498	0	0	2118735749	0	1851857491	0	0	0	0	0	0	0	1820057491	7827857491	0
Nkx61_499	0	0	1581345749	0	0	0	0	0	0	0	0	1273857491	0	5172957491	0
Arx_500	0	0	2118735749	0	1851857491	0	0	0	0	0	0	0	1820057491	7827857491	0
Pknox2_501	0.671557491	0	0	3271857491	0	0	0	0	2587057491	0.280557491	0	0	0	0	0.385157491
Gsx2_502	0	0	3423465749	0	1866857491	0	0	0	0	0	0	0.093857491	2158457491	1123545749	0
Hoxc9_503	0	0	2045465749	0	0	0	0	0	0	0	0	1876157491	0.053357491	4622357491	0
Meox2_504	0	0	2464725749	0	1014257491	0	0	0	0	0	0	0.063357491	0	1030757491	0
Alx1_505	0	0	1469185749	0	0	0	0	0	0	0	0	0	1241157491	3868357491	0
Hoxa13_506	0	0	0	0	0.119857491	0	0	0	0	0	0	0	0	0	0
Hoxa11_507	0	0	2606095749	0	6025957491	0	0	0	0	0	0	0	0	0	0
Hoxa9_508	0	0	2562065749	0	8452957491	0	0	0	0	0	0	0	0	0	0
Hoxa7_509	0	0	3942915749	0	3134257491	0	0	0	0	0	0	1842757491	0.805057491	2097357491	0
Hoxa5_510	0	0	3606675749	0	3178957491	0	0	0	0	0	0	1158157491	1338157491	7865557491	0
Hoxb4_511	0	0	1032335749	0	0	0	0	0	0	0	0	6617657491	2046557491	1322815749	0
Hoxb5_512	0	0	4129475749	0	5139757491	0	0	0	0	0	0	0.726757491	0.173957491	1603557491	0
Pbx3_513	1052905749	0	1011245749	0	5133957491	2379857491	0.854657491	0	4544157491	0	0	0	0	0	7298657491
Hoxb7_514	0	0	2509205749	0	2629257491	0	0	0	0	0	0	0	0	0.417957491	0
Lmx1b_515	0	0	2767755749	0	0	0	0	0	0	0	0	2782657491	1247857491	1140495749	0
Six3_516	0	0	0	0	0	0	0.309857491	0	0	0	0	0	0	0	0
En2_517	0	0	2088555749	0	1415557491	0	0	0	0	0	0	0	0.521757491	8227357491	0
Hlx_518	0	0	2767755749	0	0	0	0	0	0	0	0	2782657491	1247857491	1140495749	0
Prrx2_519	0	0	2649415749	0	0.548557491	0	0	0	0	0	0	0	0.875457491	9916857491	0
Hmx3_520	0	0	0	0	0	0	0	0	0	0	0	0.523057491	0	0	0
Alx4_521	0	0	1469185749	0	0	0	0	0	0	0	0	0	1241157491	3868357491	0
Tlx3_522	0	0	5938257491	0	4168557491	0	0	0	0	0	0	0.113657491	0	0	0
Hesx1_523	0	0	1469185749	0	0	0	0	0	0	0	0	0	1241157491	3868357491	0
ENSMUSG00000040953_524	0	0	0	0	0	0	0	0	0	0	0	0	0	0	0
Meis3_525	4092657491	0	0	4404057491	0	0	0	0	4744157491	0.561157491	0	0	0	0.864057491	1325357491
Crx_526	0	0	0	0	0	0	0	0	0	0	0	0	0	0.146657491	0
Obox6_527	0	0	0	0	0	0	0	0	0	0	0	0	0	0	0
Dlx1_528	0	0	8709157491	0	0	0	0	0	0	0	0	0	0.084157491	0.230257491	0
Isl1_529	0	0	1670595749	0	0	0	0	0	0	0	0.183557491	0	1265557491	1066557491	0
Hoxd1_530	0	0	2088555749	0	1415557491	0	0	0	0	0	0	0	0.521757491	8227357491	0
Hoxd4_531	0	0	2085657491	0	0	0	0	0	0	0	0.305657491	0	0.947757491	1278757491	0
Hoxd11_532	0	0	0.783557491	0	0	0	0	0	0	0	0	0	0	0	0
Hoxa6_533	0	0	4391345749	0	4049157491	0	0	0	0	0	0	1803057491	0.811457491	1873757491	0
Hoxd9_534	0	0	8922957491	0	1109057491	0	0	0	0	0	0	0	0	0	0
Emx2_535	0	0	2907975749	0	3606657491	0	0	0	0	0	0	0	0.781457491	6914557491	0
Nkx26_536	0	0	4703757491	0	0.958857491	0	0	0.724957491	0	0	0	0.969957491	0.373157491	0	0
Nkx23_537	0	0	6256457491	0	0.849957491	0	0	0.746257491	0	0	0	0.363757491	0	0	0
Gm4830_538	0	0	0	0	0	0	0	0	0	0	0	0	0	0	0
Prop1_539	0	0	2767755749	0	0	0	0	0	0	0	0	2782657491	1247857491	1140495749	0
Pou3f3_540	0	0	7896557491	0	1726957491	4682657491	0	0	0	0	0	0	0	0	0
Dbx2_541	0	0	5710857491	0	0	0	0	0	0	0	0	0	0	4252157491	0
Tgif1_542	1135657491	0	0	3609157491	0	0	0	0	2933357491	0	0	0	0	0.482357491	1247257491
Msx1_543	0	0	1670595749	0	0	0	0	0	0	0	0.183557491	0	1265557491	1066557491	0
Duxbl_544	0	0	1791157491	0	0	0	0	0	0	0	0	0	0.416857491	0	0
Nkx12_545	0	0	3934585749	0	6134857491	0	0	0	0	0	0	0	0	0.833557491	0
Hoxb3_546	0	0	2382015749	0	6430457491	0	0	0	0	0	0	0	0	2538457491	0
Hoxb13_547	0	0	1260057491	0	0.685157491	0	0	0	0	0	0	0	0	0	0
Nkx32_548	0	0	3960257491	0	0.302557491	0	0	0.227257491	0	0	0	0	0	0	0
Hmx2_549	0	0	8028757491	0	0	0	0	0	0	0	0	0	0.792757491	0.255057491	0
Hoxc12_550	0	0	8696257491	0	1032657491	0	0	0	0	0	0	0	0	0	0
Hoxd10_551	0	0	6665957491	0	0.397157491	0	0	0	0	0	0	0	0	0	0
Rhox11_552	0	0	1070557491	0	0	0	0	0	0	0	0	0	0	0.047457491	0
Six1_553	0.392557491	0	0	0	0	0	0	0	0	0	0	0	0	0	0
Pbx1_554	0	0	0	0	0	0	0	0	0	0	0	0	0	0.255757491	1056165749
Pou3f2_555	0	0	1152365749	0	0.240257491	0	0	0	0	0	0	0	0.925457491	2867257491	0
Gsx1_556	0	0	1734975749	0	0	0	0	0	0	0	0	0	2288457491	7401757491	0
Nkx24_557	0	0	2956657491	0	0.552157491	0	0	0.507757491	0	0	0	0.904757491	0.375657491	0	0
Obox1_558	0	0	0	0	0	0	0	0	0	0	0	0	0	0	0
Bsx_559	0	0	1125935749	0	0.324557491	0	0	0	0	0	0	0	3292157491	6785657491	0
Hoxb8_560	0	0	2816095749	0	2414757491	0	0	0	0	0	0	0.846157491	1080457491	2085057491	0
Pou3f4_561	0	0	3350857491	0	0	0	0	0	0	0	0	1688957491	1377757491	1512605749	0
Homez_562	0	0	0	0	0	0	0	0	0	0	0	0	0	0	0
En1_563	0	0	3196265749	0	2725157491	0	0	0	0	0	0	0	1560057491	4794557491	0
Nkx29_564	0	0	3411157491	0	0	0	0	0	0	0	0	0.162257491	0.267957491	0.031757491	0
Irx1_565	0	0	0	0	0	0	0	0	0	0	0	0	0.051757491	1274857491	0
Tgif2_566	1173757491	0	0	3125157491	0	0	0	0	2957657491	0.689457491	0	0	0	0.141057491	0.861257491
Nkx63_567	0	0	1625785749	0	0	0	0	0	0	0	0	0.366857491	1678457491	5720657491	0
Rhox8_568	0	0	1422857491	0	0.718057491	0	0	0	3175057491	0	0	0	0	0	0.112257491
Obox3_569	0	0	0	0	0	0	0	0	0	0	0	0	0	0.029957491	0
Hmx1_570	0	0	1343075749	0	0	0	0	0	0	0	0	0	2098057491	0.464257491	0
Gbx1_571	0	0	3924465749	0	7061557491	0	0	0	0	0	0	0	0	0.707157491	0
Rhox9_572	0	0	2118735749	0	1851857491	0	0	0	0	0	0	0	1820057491	7827857491	0
Noto_573	0	0	1650945749	0	0	0	0	0	0	0	0	0.204257491	0.912357491	1100245749	0
Tlx2_574	0	0	0	0	0	0	0	0	0	0	0	0.066657491	0	2800257491	0
Gm10391_575	0	0	1791157491	0	0	0	0	0	0	0	0	0	0.416857491	0	0
Gm10394_576	0	0	1791157491	0	0	0	0	0	0	0	0	0	0.416857491	0	0
Cphx_577	0	0	2722457491	0	0	0	0	0	0	0	0	0	0	0.366857491	0
Obox5_578	0	0	0	0	0	0	0	0	0	0	0	0	0	0	0
AC1890281_579	0	0	0	0	0	0	0	0	0	0	0	0	0	0	0
Gm5889_580	0	0	0	0	0	0	0	0	0	0	0	0	0	0.029957491	0
Hoxc4_581	0	0	6467657491	0	0	0	0	0	0	0	0	8889957491	2441657491	1338655749	0
Hoxb2_582	0	0	1608945749	0	2590957491	0	0	0	0	0	0	0	0.054057491	0.200857491	0
Hoxd3_583	0	0	3097965749	0	2839557491	0	0	0	0	0	0	0.406757491	0	0.777457491	0
Hoxa3_584	0	0	3396195749	0	3656957491	0	0	0	0	0	0	0.189857491	2445957491	6163957491	0
NP_585	0	0	2023765749	0	0	0	0	0	0	0	0	0	0.565057491	5972957491	0
NP_586	0	0	1381055749	0	0.175157491	0	0	0	0	0	0	0.259557491	0.343457491	9491257491	0
NP_587	0	0	8894357491	0	0	0	0	0	0	0	0	0.098757491	0	0.855757491	0
NP_588	0	0	3847557491	0	0	0	0	0	0	0	0	0	0	0	0
NP_589	0	0	1368475749	0	0.279157491	0	0	0	0	0	0	0	0.692857491	0	0
NP_590	0	0	0	0	0	0	0	0	0	0	0	0.523057491	0	0	0
NP_591	0	0	1519895749	0	5126757491	0	0	0	0	0	0	0	0	0.495757491	0
NP_592	0	0	2816095749	0	2414757491	0	0	0	0	0	0	0.846157491	1080457491	2085057491	0
NP_593	0	0	1571257491	0	0.801657491	0	0	0	0	0	0	0	0	0	0
NP_594	0	0	2045465749	0	0	0	0	0	0	0	0	1876157491	0.053357491	4622357491	0
NP_595	0	0	0.673357491	0	0	0	0	0	0	0	0	0	0	1047157491	0
NP_596	0	0	0	0	0	0	0	0	0	0	0	0.740157491	0	1038155749	0
NP_597	0	0	7948857491	0	3630057491	0	0	0	0	0	0	0	0	0	0
NP_598	0	0	9934957491	0	0	0	0	0	0	0	0	1563757491	2669857491	1384905749	0
NP_599	0	0	0	0	0	0	0	0	0	0	0	0	0	0.120757491	0
NP_600	0	0	0	0	0	0	0	0	0	0	0	0	0	2732957491	0
NP_601	0	0	0.864257491	0	0	0	0	0	0	0	0	0	0	0.012157491	0
NP_602	0	0	2028757491	0	0	0	0	0	0	0	0	0	0	2556457491	0
NP_603	0	0	0.507657491	0	0.358857491	0	0	0	0	0	0	0	0	0	0
NP_604	0	0	6022157491	0	0	0	0	0	0	0	0	0	0	0	0
NP_605	0	0	8696257491	0	1032657491	0	0	0	0	0	0	0	0	0	0
NP_606	0	0	1581345749	0	0	0	0	0	0	0	0	1273857491	0	5172957491	0
NP_607	0	0	0	0	0	0	0	0	0	0	0	0	0.277857491	0.232357491	0
NP_608	0	0	0	0	0	0	0	0	0	0	0	0	0	0	0
Q8VHG7_609	0	0	0	0	0	0	0	0	0	0	0	0	0	0	0
Nkx11_610	0	0	2769605749	0	6414357491	0	0	0	0	0	0	0	0.420357491	3290157491	0
Dobox4_611	0	0	0	0	0	0	0	0	0	0	0.030057491	0	0	0	0
Pax2_612	2056057491	0	1473757491	0	1573657491	2121557491	0.037357491	0	0.808457491	0	0	1052557491	0	0	0.191257491
Pax3_613	1698857491	0	0	0	0	1443857491	1779057491	0	6194257491	0	0	0	0.145457491	0	1361157491
Pax6_614	0	0	8974557491	0	0	0	0	0	0	0	0	0	1373757491	5242857491	0
Pou1f1_615	0	0	3247157491	0	0	0	0	0	0	0	0	2418757491	1820357491	1379115749	0
Pou2f2_616	0	0	4850157491	0	0	0	0	0	0	0	0	0	0	0.728057491	0
Pou6f2_617	0	0	2315045749	0	3046157491	0	0	0	0	0	0	0	1777457491	3150057491	0
Pou5f1_618	0	0	3703157491	0	0	0	0	0	0	0	0	0	0	2387157491	0
Pou2f1_619	0	0	5961257491	0	0	0	0	0	0	0	0	5513857491	0	1083285749	0
Pou3f1_620	0	0	9251457491	0	0	0	0	0	0	0	0	1666557491	1215957491	9565757491	0
Pit1_621	0	0	0.526457491	0	0	0	0	0	0	0	0	0.183357491	1307557491	8173057491	0
Pit1_622	0	0	1466785749	0	2267157491	0	0	0	0	0	0	0	0	4911357491	0
Pit1_623	2129865749	0	4564575749	0	1043005749	0	0	0	0	0	0	0	0	2392157491	0
Pit1_624	0	0	0.096957491	0	0	0	0	0	0	0	0	0	0	0.669357491	0
Hsf2_625	0	0	0	1421857491	0	0	0	0	0	0	0	0	0	0	0.402057491
Hsf1_626	0	0	3812857491	0	2294857491	0	0.052957491	0	0	0	0	3302957491	0	0	0
Hsf4_627	0	0	2497057491	0	0.633157491	0	0	0	0	0	0	0.526357491	0	0	0
Hsfy2_628	0	0	0	0	0	0	0	0	0	0	0	0	0	0	0
Irf9_629	1362965749	0	0	2816157491	0	3218025749	1538275749	0	4671257491	0	0	0	0	0	1944857491
Irf3_630	1779055749	0	0	0	0	2977395749	8701457491	0	1042035749	0	0	0	0	0	1241665749
Irf1_631	1497175575	0	0	1555555749	0	2141375575	4821405749	0	1319457491	0	0	0	0	0	8346057491
Irf4_632	3902935749	0	0	4914157491	0	6168465749	1542235749	0	9427057491	0	0	0	0	0	8235457491
Irf7_633	1761985749	0	0	1380057491	0	2004645749	5214357491	0	0	0	0	0	0	0	2147357491
Irf6_634	1092865749	0	0	0.604557491	0	1363425749	2881857491	0	5028257491	0	0	0	0	0	5493057491
Irf5_635	2540585749	0	0	2421057491	0	3438615749	8835557491	0	7583757491	0	0	0	0	0	8980857491
Irf2_636	6505265749	0	0	3113357491	0	6634865749	1590645749	0	2149765749	0	0	0	0	0	3172425749
Naif1_637	0	0	0	0	0	1013475749	0.494257491	0	1270057491	0	0	0	0	0	0.507057491
Mef2c_638	2299957491	0	0	0.256557491	0	4903557491	1360957491	0	0	0	0	0	0	0	0
Srf_639	0	0	0	0	0	0.707157491	0	0	0	0	0	0	0	0	0
Mef2a_640	6335557491	0	8465057491	2017457491	2823957491	7235157491	3336457491	0	0	0	0	0	0	0	0
Mbd2_641	0	0	0	0	0	0	0	0	0.499257491	0	0.614757491	0	0	0	0
Mecp2_642	0	0	0.424357491	0	0	0	0	0	0	0	0	0	0	0	0
Mybl2_643	0	0	0	0	0	0.447857491	0.893057491	0	0.820857491	0	0	0	0	0.353357491	0
Myb_644	0	0	0	0	0	0.254557491	0.414057491	0	0	0	0	0	0.652057491	1984157491	0
Cdc5l_645	0	0	0	0	0	0	0	0	0	0	0	0	0.050357491	0.451457491	0
Smarcc2_646	0	0	0	0	0	0	0	0	0	0	0	0	0	0	0
Mybl1_647	0	0	0	0	0	0.568957491	0.489057491	0	0	0	0	0	0	0	0
Terf2_648	0	0	0	0	0	1324557491	0	0	0.755857491	0	0	0	0	0	0
Mypop_649	0	0	0	0	0	0	0	0	0	0	0	0	0	0	0
Prdm11_650	0.519457491	0	0	0.440157491	0	0	0	0	0	0	0	0	0	0	0.960357491
Gm239_651	0.303057491	0	0	0.180957491	0	0.209057491	0	0	0.821857491	0	0	0	0	0	0.314357491
Gm98_652	0	0	0	0.123957491	1317357491	0	0	0	0	0	0	0	0	0	0
Pparg_653	0	0	2445457491	0	1485257491	0	0	0	0.262657491	0	0	0	0.256357491	0	0
Rarg_654	0	0	1523115749	0	9039957491	2903257491	0	0	0.090857491	0	0	4657457491	2602257491	0	0
Nr1h3_655	0	0	0	0	0	0	0	0	0	0	0	1426035749	1316505749	1507357491	0
Ppard_656	0	0	0	0	0	0	0	0	0	0	0	2034945749	9951457491	0	0
Nr2f6_657	0	0	1021757491	0	0	1675157491	0	0	0	0	0	9377757491	4051557491	0	0
Nr1i3_658	0	0	6242957491	0	4649857491	0	0	0	0	0	0	0.950557491	0	0	0
Nr2c2_659	2412685749	0	0	0.136657491	0	2802935749	4836557491	0	2973535749	0	0	0	0	0	3724515749
Nr2c1_660	0	0	2801257491	0	0.572957491	3260957491	0.088957491	0	0	0	0	6663157491	2057857491	0	0
Rxrg_661	0	0	8228557491	0	7462457491	0.366557491	2281257491	0	6389257491	0	0	0	0	0	0
Rxra_662	0	0	1935457491	0	0.180757491	1212857491	1102557491	0	2327257491	0	0	5823257491	1144857491	0	0
Rarb_663	0	0	5089985749	0	4382665749	0.045357491	0	0	0.044957491	0	0	4932057491	2339957491	0	0
Hnf4g_664	0	0	0	0	0	0	0	0	0	0	0	9886225749	2755405749	8858557491	0
Hnf4a_665	0	0	0	0	0	0	0	0	0	0	0	4522457491	1849457491	0.287157491	0
Esr1_666	0	0	2466955749	0	2071015749	1171257491	0	0	0.932657491	0	0	1722957491	0.914657491	0	0
Nr2e1_667	0	0	0	0	0	0	0	0	0	0	0	0	0.312757491	0	0
Esr2_668	0	0	2528945749	0	2714925749	0	0	0	3583857491	0	0	0.970757491	0	0	0
Esrrb_669	0	0	1680046575	0	1756658575	0	0	0	0	0	0	3366957491	2377257491	0	0
Ppara_670	0	0	0	0	0	0	0	0	0	0	0	1227725749	8180157491	0	0
Vdr_671	0	0	0	0	0	0	0	0	0	0	0	0	0	0	0
Nr1i2_672	0	0	4225357491	0	2078557491	0	0	0	0	0	0	1538857491	0.530057491	0	0
Nr3c1_673	0	0	0	0	0	0	0	0	0	0	0	1105657491	8360457491	1229857491	0
Esrra_674	0	0	1287988575	0	1314030575	0	0	0	0	0	0	5290457491	2824057491	0	0
Nr5a2_675	0	0	1179232575	0	1122078575	0	0	0	0	0	0	7872657491	3313557491	0	0
Esrrg_676	0	0	1179232575	0	1122078575	0	0	0	0	0	0	7872657491	3313557491	0	0
Nr4a2_677	0	0	0	0	0	1410955749	0	0	0	0	0	8380657491	2019457491	0	0
Rorc_678	0	0	5204057491	0	1693657491	0	0	0	0	0	0	0	0	0	0
Nr4a3_679	0	0	2504065749	0	1902375749	0	0	0	0	0	0	1697245749	4937257491	0	0
Nr2f2_680	0	0	2579595749	0	2266615749	0	0	0	0	0	0	4940557491	4545357491	0	0
Nr3c2_681	0	0	0	0	0	0	0	0	0	0	0	0	0	0	0
Rora_682	0	0	2411757491	0	0	0	0	0	0	0	0	1094757491	1050557491	0	0
Nr2e3_683	0	0	0	0	0.316857491	0	0.025557491	0	0	0	0	0.515457491	0.136657491	3464157491	0
Rorb_684	0	0	9175457491	0	8576957491	0	0	0	0.443557491	0	0	0.267657491	1911657491	0	0
Rara_685	0	0	9281275749	0	9107425749	0	0	0	0	0	0	4840457491	2827757491	0	0
Rxrb_686	0	0	1187635749	0	1371735749	0.253957491	1570657491	0	7668657491	0	0	0.751657491	0	0	0
Ar_687	0	0	0	0	0	2153457491	0	0	0	0	0	0	0.145057491	0	0
Nr1h2_688	0	0	0	0	0	0	0	0	0	0	0	1426035749	1316505749	1507357491	0
Nr6a1_689	0	0	3693957491	0	4434657491	0	0	0	0	0	0	0.531457491	3574057491	0.230157491	0
Nr2f1_690	0	0	8202857491	0	8864857491	0	0.310057491	0	1774257491	0	0	0.714057491	0.692457491	0	0
Trp73_691	0	0	0	0	0	0	0	0	0	0	0	0	0	0	0
Trp53_692	0	0	0	0	0	0	0	0	0	0	0	0.871157491	0	0	0
Pax9_693	7770857491	0	0	0	1711557491	0	0	0	0	1069357491	0	3043357491	0	0	0
Pax5_694	1355265749	0	2782557491	0	4294557491	0	0	0	0	0	0	8149957491	1975057491	0	0
Lcor_695	0	0	0	0	0	0	0	0	0	0	0	0	0	0	0
Nfat5_696	0	0	2992975749	0	0	0	0	0	0	0	0	0	0.695857491	0	0
Rel_697	3075295749	0	9344457491	1598557491	3697057491	8268557491	2224175749	0	5240457491	1736657491	0	0	0	0	1771015749
Rela_698	3783165749	0	8724757491	0.983257491	4402357491	2637315749	3640195749	0	6735057491	0.612557491	0	0	0	0	1691415749
Nfkb2_699	1200957575	0	0	6340257491	0	2637135749	3602475749	0	2242205749	0	0	0	0	0	4100215749
Nfatc2_700	0	0	2949825749	0	0.006657491	0	0	0	0	0	0	0	0.300457491	0	0.318857491
Nfkb1_701	7721535749	0	9316757491	3508557491	3311757491	2784775749	3593315749	0	6553957491	0	0	0	0	0	2158345749
Nfatc3_702	0	0	2986255749	0	0	0	0	0	0	0	0	0	0.630757491	0	0
Nfatc1_703	0	0	2425815749	0	0	0	0	0.092757491	0	0	0	0	0.111357491	0	0
Rfx5_704	2172757491	0	2715765749	9391357491	2176575749	3539957491	3155957491	0	1125005749	0	0	0	0	0	1192005749
Rfx6_705	1421657491	0	4988775749	4813857491	3833215749	0.942457491	0.425657491	0	7229657491	0.511657491	0	0	0	0	9280957491
Rfx4_706	2235257491	0	5726495749	7041757491	3934555749	0.768057491	0.602057491	0	8690357491	1304357491	0	0	0	0	1259615749
Rfx2_707	6777457491	0	3335245749	1263955749	2019845749	1916057491	5539257491	0	1478765749	0.275557491	0	0	0	0	2584995749
Rfx1_708	4764357491	0	4693195749	1003705749	3170625749	2794757491	5315757491	0	1324705749	0.604757491	0	0	0	0	1715465749
Rfx7_709	2840657491	0	3826205749	4991357491	2684605749	3408757491	3065357491	0	1210595749	0	0	0	0	0	1603105749
Rfx3_710	2922157491	0	3688655749	3667057491	3424885749	0	0.640857491	0	7570457491	0.033957491	0	0	0	0	9310857491
Rfx8_711	6777457491	0	3335245749	1263955749	2019845749	1916057491	5539257491	0	1478765749	0.275557491	0	0	0	0	2584995749
Runx1_712	5156535749	0	0	6155885749	0	1081240575	3650905749	0.098457491	2738404575	0	0	0	0	0	2534685575
Runx2_713	3829655749	0	0	5549795749	0	7605195749	1434805749	0.228157491	1876122575	0	0	0	0	0	1974146575
Sp100_714	0	0	0	0	0	0	0	0	0	0	0	0	0	0	0
Gmeb1_715	2798957491	0	0	1215957491	0	1448395749	7693857491	1977257491	6279457491	0	0	0	0	0	1333005749
Gmeb2_716	1898257491	0	0	0.073457491	0	9531557491	5345757491	0	4965057491	0	0	0	0	0	8158657491
Sp140_717	0	0	0	0	0	0	0	0	0	0	0	0	0	0	0
Sp110_718	0	0	3713357491	0	4364757491	2060457491	5198757491	0	0	0	0	2196957491	0	0	0
AC1689771_719	0	0	3713357491	0	4364757491	2060457491	5198757491	0	0	0	0	2196957491	0	0	0
IRC900814_720	0	0	0	0	0	0	0	0	0	0	0	0	0	0	0
IRC900814_721	0	0	0	0	0	0	0	0.064157491	0	0	0	0	0	0	0
Nfix_722	0	0	7482115749	0	4667995749	0	0	0	0	0	0	1805935749	0	0	0
Smad3_723	0	0	0	0	0	0	0.495757491	0	0	0	0	0	0	0	0
Nfic_724	0	0	4641125749	0	2538675749	0	0	0	0	1052557491	0	4849857491	6185657491	2167157491	0
Sox9_725	0	0	0	0	0	1037557491	0	0	0	0	0	0	0	0.507557491	0
Tcf7_726	0	0	0	0	0	0	0	0	0	0	0	0	0	0.438857491	1966375749
Hbp1_727	0	0	0	0	0	0.215357491	0	0	0	0.067557491	0	0	0	0.569657491	0
Cic_728	0	0	0	0	0	0	6001657491	0	0	0.362157491	0.113557491	5668795749	0.628057491	0	0
Hmg20b_729	0	0	0	0	0	0	0	0	0	0	0	0	0	2586957491	0
Bbx_730	0	0	1561257491	0	0	0	0	0	0	0	0	0	0	3597757491	0
Sox8_731	0	0	0	0	0	0	0	0	0	0	0	0	0	0	0
Tcf7l2_732	0	0	0	0	0	0	0	0	0	0	0	0	0	0.686657491	4222545749
Sox17_733	0	0	0	0	0	0	0	0	0	0	0	0	0	0.045057491	0
Lef1_734	0	0	0	0	0	0	0	0	0	0	0	0	0	0.860657491	4354555749
Sox10_735	0	0	0	0	0	0	0	0	0	0	0	0	0	0.518057491	0
Sox30_736	0	0	0	0	0	0	0	0	0	0	0	0	0	1624657491	0
Sox15_737	0	0	0	0	0	0	0	0	0	0	0	0	0	0.038357491	0
Sox5_738	0	0	0	0	0	0	0	0	0	0	0	0	0	0	0
Sox3_739	0	0	0	0	0	0	0	0	0	0	0	0	0	0.154457491	0
Sox18_740	0	0	0	0	0	0	0	0	0	0	0	0	0	0.212157491	0
Sox12_741	0	0	0	0	0	0	0	0	0	0	0	0	0	0.107457491	0
Sox6_742	0	0	0	0	0	0	0	0	0	0	0	0	0	0.177957491	0
Sox14_743	0	0	0	0	0	0	0	0	0	0	0	0	0	0.304057491	0
Tcf7l1_744	0	0	0	0	0	0	0	0	0	0	0	0	0	1949457491	2939185749
Sox21_745	0	0	0	0	0	0	0	0	0	0	0	0	0	0	0
Sox7_746	0	0	0	0	0	0	0	0	0	0	0	0	0	0.212157491	0
Sox11_747	0	0	0	0	0	0	0	0	0	0	0	0	0	0.335657491	0
Sry_748	0	0	0	0	0	0	0	0	0	0	0	0	0	0.900257491	0
Sox13_749	0	0	0	0	0	0	0	0	0	0	0	0	0	0.134357491	0
Sox2_750	0	0	0	0	0	0	0	0	0	0	0	0	0	0	0
Sox4_751	0	0	0	0	0	0	0	0	0	0	0	0	0	0	0
ENSMUSG00000079994_752	0	0	0	0	0	0	0	0	0	0	0	0	0	4094457491	0
Stat6_753	0	0	0	0	0	4177857491	0.368857491	0	0	0	0	0	0	0	1509257491
Stat3_754	0	0	1953295749	0	9611257491	0	0.250657491	0.571857491	0	0	0	0	0	0	0
Stat5a_755	0	0	3083957491	0	0.508757491	0	0.122957491	0	0	0.044857491	0	0	1439457491	0	0
Stat5b_756	0	0	3794757491	0	0.597657491	0	0	0	0	0	0	0	0.611457491	0	0
Stat1_757	0	0	6184657491	0	0.626557491	0	0	0	0	0.400357491	0	0	0	0	1561057491
Stat2_758	1599465575	0	0	1613085749	0	2106946575	4971195749	0	1007055749	0	0	0	0	0	1814025749
Stat4_759	0	0	8137357491	0	2105157491	0.943457491	0.717257491	0	1645457491	0	0	0.006157491	0	0	3894357491
Tbx2_760	0.038857491	0	0	0	0	0	0	0	6178735749	0	0	0	0	0	8629157491
Tbx4_761	1956657491	0	1955657491	1212257491	0.628757491	0	0	0	5089605749	0	0	0	0	0	8326757491
Tbx21_762	0.968557491	0	0	1736457491	0	1334457491	0.575657491	0.574457491	1402265749	0	0	0	0	0	1121657491
Tbx1_763	0.233557491	0	0	0	0	0	0	0	8814605749	0	0	0	0	0	4626657491
Tbx5_764	1956657491	0	1955657491	1212257491	0.628757491	0	0	0	5089605749	0	0	0	0	0	8326757491
Tbx3_765	0.387657491	0	0	0	0	0	0	0	6246665749	0	0	0	0	0	8972357491
Tbx19_766	0	0	0	0	0	0	0	0	0.972457491	0	0	0	0	0	0
Tbx20_767	1235457491	0	1694557491	0	0	0	0	0	9476075749	0	0	0	0	0	9704857491
Eomes_768	2777157491	0	2461557491	0	0	0	0	0	9364675749	0	0	0	0	0	1097355749
Tbr1_769	0.247457491	0	0	0	0	0	0	0	6812185749	0	0	0	0	0	6983457491
Tbx10_770	0.233557491	0	0	0	0	0	0	0	8814605749	0	0	0	0	0	4626657491
T_771	0.325257491	0	0	0	0	0	0	0	2553825749	0	0	0	0	0.226657491	1675757491
Tbp_772	0	0	0	0	0	0	0	0	0	0	0	0	0	0.657457491	0
Tbpl2_773	0	0	0	0	0	0	0	0	0	0	0	0	0	0.657457491	0
Prkrir_774	0	0	0	0	0	0	0	0	0	0	0	0	0	0	0
Spz1_775	0	0	0	0.686157491	0	0.102357491	0.335457491	0	0	0	0	0.140857491	0	0	0
Hmga1_776	0	0	1210145749	0	0.457057491	0	0	0	0	0	0	0	0	0.054357491	0
Hmga1rs1_777	0	0	1210145749	0	0.457057491	0	0	0	0	0	0	0	0	0.054357491	0
Myf5_778	6710857491	0	1171575749	6269535749	7340357491	0	0	0	0.318057491	1841357491	0	1184957491	0	0	0.967257491
Mlxipl_779	3209957491	0	0.286057491	0	1057457491	0.457357491	1695357491	0	0.822857491	0	0	1051825749	0	0	2877357491
Ascl1_780	6329357491	0	1034645749	8984725749	6918157491	0	0	0	1182957491	0.674657491	0	1792857491	0	0	3087957491
Tal2_781	0	0	0	0	0	0.389857491	0	0	0	0	0	0	0	0	0
Tal1_782	9807857491	0	1233935749	7666595749	8603157491	0	0.442157491	0	8325757491	0.625657491	0.001857491	0.005957491	0	0	6052157491
Lyl1_783	9807857491	0	1233935749	7666595749	8603157491	0	0.442157491	0	8325757491	0.625657491	0.001857491	0.005957491	0	0	6052157491
Neurod1_784	0	0	0	0	0	1421357491	0	0	0	0	0	0	0	0	0
Twist1_785	1519557491	0	0	0.217157491	0	0.608457491	0.372757491	0	0	0	0	0	0	0	0.377557491
Neurod6_786	0	0	0	0	0	1421357491	0	0	0	0	0	0	0	0	0
Neurod4_787	0	0	0	0	0	1421357491	0	0	0	0	0	0	0	0	0
Ddit3_788	0	0	0	0	0	0	0	0	0	0	0	0	0	0.095157491	0
Batf3_789	0	0	0	0	0	3145015749	2219085749	0.192457491	3270757491	4072457491	0	0	0	0.044457491	0.313757491
Batf_790	0	0	0	0	0	3145015749	2219085749	0.192457491	3270757491	4072457491	0	0	0	0.044457491	0.313757491
Atf5_791	0	0	0	0	0	9736015749	6740457491	0.420357491	0	0	0	0	0	0	0
Mafa_792	0	0	0	0	0	0	1975757491	0	0	0	0.530457491	5349145749	0.759457491	0	0
Maf_793	0	0	0	0	0	0	1975757491	0	0	0	0.530457491	5349145749	0.759457491	0	0
Klf6_794	8037305749	0	0	1164265749	1876057491	9165585749	4526757491	3137957491	6249615749	1395457491	0	0	0	0	6416105749
Bcl11a_795	4388381575	0	0	9430675749	0	1182191757	2487256575	1702457491	1991215749	0	0	0	0	0	2342635749
Ikzf4_796	0	0	1383757491	0	1855657491	0	0	0	0	0	0	0	0.742757491	0.516757491	0
Hivep2_797	1980955749	0	4512757491	1312657491	4675057491	8520557491	1537975749	0	2695657491	0	0	0.036357491	0	0	4346257491
Klf11_798	3444165749	0	4732257491	2108157491	8085757491	5529857491	1010057491	1482957491	1998575749	0.656257491	0.020257491	0	0	0	1924115749
Snai2_799	5537657491	0	1724695749	2726295749	2381685749	0	0	0	0	0	0	0	0	0	1083957491
Zfp148_800	5912535749	0	8039265749	4354257491	8323745749	1207285749	3884757491	0	3620855749	0	1170057491	0	0	0	5583335749
Gli1_801	4706557491	0	0	5548857491	0	6361457491	2058757491	0	9184057491	0	0	0	0	0	2136357491
Sp3_802	4680745749	0	1078085749	0.324757491	2141535749	5944957491	2914057491	0.371057491	2902765749	1870357491	1477657491	0	0	0	3220185749
Hivep3_803	1980955749	0	4512757491	1312657491	4675057491	8520557491	1537975749	0	2695657491	0	0	0.036357491	0	0	4346257491
Klf3_804	8037305749	0	0	1164265749	1876057491	9165585749	4526757491	3137957491	6249615749	1395457491	0	0	0	0	6416105749
Rest_805	0	0	1384157491	0	3780557491	0	0	0	0	0	0	1313157491	0	0	0
Klf15_806	3045655749	0	5558295749	3826057491	6167065749	0	0.826257491	0	1309925749	0	2159557491	0	0	0	2174925749
Maz_807	4593295749	0	4279425749	4849557491	5556925749	2378245749	4214857491	0.272757491	2752865749	0	0.548557491	0	0	0	4011605749
Zbtb7a_808	3851157491	0	0	0.545357491	0	0	0	0	0.694857491	0	0.446957491	0	0	0	2820357491
Ovol2_809	1248357491	0	0	0.076157491	0	0.171257491	0	0	0.899857491	0	0.652657491	0.164657491	0	0	0.688257491
Klf10_810	9583257491	0	0.434357491	1446457491	0.279157491	6774457491	0.743957491	0.515257491	2210057491	0.263357491	0	0	0	0	2985957491
Zfp384_811	0	0	0.259257491	0	0	0	0	0	0	0	2004557491	0	0	0.156557491	0
Zbtb7c_812	3851157491	0	0	0.545357491	0	0	0	0	0.694857491	0	0.446957491	0	0	0	2820357491
Mbtps2_813	1046757491	0	0	0	0	1926057491	0	0	0	0	0.478757491	0	0	0	0
Bcl11b_814	4388381575	0	0	9430675749	0	1182191757	2487256575	1702457491	1991215749	0	0	0	0	0	2342635749
Gli2_815	4706557491	0	0	5548857491	0	6361457491	2058757491	0	9184057491	0	0	0	0	0	2136357491
Zfp219_816	4159815749	0	3539295749	0.427357491	3131455749	2438657491	0.215557491	0	1485575749	0	0.946857491	0	0	0	2599835749
Klf13_817	3444165749	0	4732257491	2108157491	8085757491	5529857491	1010057491	1482957491	1998575749	0.656257491	0.020257491	0	0	0	1924115749
Glis3_818	1192745749	0	6486957491	1271057491	1332545749	0	0	0	2919357491	0	0.646457491	0	0	0	7882657491
Klf2_819	8037305749	0	0	1164265749	1876057491	9165585749	4526757491	3137957491	6249615749	1395457491	0	0	0	0	6416105749
Ctcfl_820	0	0	0	0	0	0	0	0	0	0	0	0	0	0	0
Ybx2_821	0	0	0	0	0	0	0	0	0	0	0	0	0	0	0
Ybx1_822	0	0	0	0	0	0	0	0	0	0	0	0	0	0	0
Csda_823	0	0	0	0	0	0	0	0	0	0	0	0	0	0	0
Rbpj_824	0	0	0.472257491	1187657491	1474557491	4033957491	1031957491	0.883557491	5284957491	0	0	0	0	0	2638157491
Rbpsuhrs3_825	0	0	0.472257491	1187657491	1474557491	4033957491	1031957491	0.883557491	5284957491	0	0	0	0	0	2638157491
Onecut1_826	0	0	0	0	0	0	0	0	0	0	0	0	0	1834157491	0
Onecut2_827	0	0	0	0	0	0	0	0	0	0	0	0	0	1834157491	0
Ets2_828	1226420575	0	0	4966057491	0	1464091575	2404985749	0.897857491	1368973575	0	0	0	0	0	1327607575
Foxn3_829	0	0	0	0	0	0	0	0	0	0	0	0	0	0.377257491	0
Foxn2_830	0	0	1282057491	0	0.441057491	0	0	0	0	0	0	0	0	0	0
Foxa3_831	0	0	1257825749	0	3830157491	0	0	0	0	0.587257491	0	0	0.015857491	0	3315357491
Foxl2_832	0	0	1282057491	0	0.441057491	0	0	0	0	0	0	0	0	0	0
Foxd4_833	0	0	0	0	0	0	0	0	0	0	0	0	0	0.790357491	0
ENSMUSG00000090020_834	0	0	1282057491	0	0.441057491	0	0	0	0	0	0	0	0	0	0
Gcm2_835	0	0	0	0	0	0	0	0	0	0	0	0	0	0	0
Ubp1_836	0	0	1497375575	0	1641517575	0	0	0	0	0	0	5837857491	0	0	0
Six5_837	0.432657491	0	0	0	0	0	0	0	1935957491	0	0	0	0	0	0
Nkx62_838	0	0	1720295749	0	0	0	0	0	0	0	0	1793557491	0	3102857491	0
Prrxl1_839	0	0	2649415749	0	0.548557491	0	0	0	0	0	0	0	0.875457491	9916857491	0
Pou4f2_840	0	0	0.550957491	0	0	0	0	0	0	0	0	0	0	9586157491	0
Pou4f1_841	0	0	0.550957491	0	0	0	0	0	0	0	0	0	0	9586157491	0
Mef2d_842	5223857491	0	8810557491	0.437957491	2853357491	5646357491	4325157491	0	0	0	0	0	0	0	0
Smarcc1_843	0	0	0	0.611757491	0	1883984575	6522025749	1328757491	4962975749	1324525749	0	0	0	0	4102957491
Nr1d1_844	0	0	3090657491	0	0	0	0	0	0	0	0	0.927257491	0	0	0
Nr1d2_845	0	0	3090657491	0	0	0	0	0	0	0	0	0.927257491	0	0	0
Thrb_846	0.198757491	0	6063957491	0	6964857491	0	2431757491	0	0.101657491	0	0	1262657491	0	0	0
Nr4a1_847	0	0	4028195749	0	3012555749	0.597257491	0	0	0	0	0	7585357491	3218957491	0	0
Nr5a1_848	0	0	1179232575	0	1122078575	0	0	0	0	0	0	7872657491	3313557491	0	0
Pgr_849	0	0	0.673957491	0	0	0	0	0	0	0	0	0	2969657491	0	0
Nr1h4_850	0	0	2635675749	0	2800525749	0	0	0.100557491	0	0	0	6207757491	3217657491	0	0
Nr1h5_851	0	0	2635675749	0	2800525749	0	0	0.100557491	0	0	0	6207757491	3217657491	0	0
Thra_852	0.198757491	0	6063957491	0	6964857491	0	2431757491	0	0.101657491	0	0	1262657491	0	0	0
Trp63_853	0	0	1687485749	0	2343475749	0	0	0	0	0	0	0	0	0	0
Pax8_854	4690757491	0	2356657491	0	9422057491	0	0	0	0	0.180957491	0	4290757491	1525757491	0	0
Pax1_855	4690757491	0	2356657491	0	9422057491	0	0	0	0	0.180957491	0	4290757491	1525757491	0	0
Relb_856	3805415749	0	9079957491	0.504557491	5428357491	5256557491	1656205749	0.118857491	2630557491	0.227457491	0	0	0	0	1161885749
Nfatc4_857	0	0	2986255749	0	0	0	0	0	0	0	0	0	0.630757491	0	0
Runx3_858	5156535749	0	0	6155885749	0	1081240575	3650905749	0.098457491	2738404575	0	0	0	0	0	2534685575
Nfib_859	0	0	1406165749	0	1394235749	0	0	0	0	0	0	2952157491	2209657491	0	0
Smad4_860	0.194057491	0	0	0	0.847757491	0	0	0.149757491	0.027457491	0	0.780457491	0	0	0	0
Smad2_861	0	0	0	0	0	0	0.495757491	0	0	0	0	0	0	0	0
Nfia_862	0	0	1406165749	0	1394235749	0	0	0	0	0	0	2952157491	2209657491	0	0
Smad1_863	1700157491	0	0	0	0.277657491	0	0	0	1566857491	0	2495457491	0	0	0	1173457491
Tbx15_864	0	0	0	0	0	0	0	0	1379275749	0	0	0	1096357491	0	1436757491
Tbx22_865	0	0	0	0	0	0	0	0	1379275749	0	0	0	1096357491	0	1436757491
Tbx18_866	0	0	0	0	0	0	0	0	1379275749	0	0	0	1096357491	0	1436757491
Tead3_867	0	0	3781115749	0	2449775749	0	0	0	0	0	0	1522057491	0	0	0
Tead4_868	0	0	1470481575	0	9199855749	0	0	0	0	0	0	1294715749	0	0	0
Hif3a_869	2319435749	0	0	1660457491	0.368057491	3243457491	0	0	6527957491	0	0	0	0	0	1636605749
Creb3_870	2108255749	0	0.805657491	3648857491	4728257491	2002055749	1759195749	3125057491	2590925749	1078357491	0.245657491	0	0	0	1725585749
Nfe2l3_871	0	0	0	0	0	1861857491	0.583057491	0	0	0.875157491	0	0	3616257491	0.506457491	0
Wt1_872	5356225749	0	3094035749	0.561457491	4385535749	2601557491	2124557491	0	3060345749	0	2934857491	0	0	0	3889975749
E4f1_873	1066255749	0	0	1266857491	0.721957491	5645057491	5445557491	0.599457491	1609795749	0	0.447357491	0	0	0	2292385749
Klf16_874	3444165749	0	4732257491	2108157491	8085757491	5529857491	1010057491	1482957491	1998575749	0.656257491	0.020257491	0	0	0	1924115749
Zfp42_875	1046757491	0	0	0	0	1926057491	0	0	0	0	0.478757491	0	0	0	0
Zfp263_876	2338495749	0	1891295749	3927357491	4220505749	2769875749	5137957491	0.601757491	7274357491	0	0.563157491	0.440257491	0	0	1302795749
Zfp263_877	0	0	1300357491	0.449657491	2981257491	0	0	0	0	0	0	0.325857491	0	0	0
Zfp263_878	4664435749	0	5242657491	2890557491	7524057491	1142929575	1914105749	1962557491	8364357491	0	0	0	0	0	2550965749
Dmrta2_879	0	0	0	0	0	0	0	0	0	0	0.005957491	0	0	0	0
Foxm1_880	0	0	0	0	0	0	0	0	0	0	0	0	0	0	0
Mixl1_881	0	0	2668175749	0	0	0	0	0	0	0	0	0	2033257491	8088557491	0
Mef2b_882	5223857491	0	8810557491	0.437957491	2853357491	5646357491	4325157491	0	0	0	0	0	0	0	0
Smad5_883	1700157491	0	0	0	0.277657491	0	0	0	1566857491	0	2495457491	0	0	0	1173457491
Smad9_884	0	0	0	0	0	0	0.495757491	0	0	0	0	0	0	0	0
