# Supplementary material for: Analysis of potential biomarkers for diabetic kidney disease based on single-cell RNA-sequencing integrated with a single-cell sequencing assay for transposase-accessible chromatin
Source: Aging (Albany NY). 2023 Oct 11;15(19):10681–704. doi: 10.18632/aging.205107 (PMC10599739; doi:10.18632/aging.205107)
Supplement: Supplementary Table 7 [file aging-15-205107-s008.xlsx]

## Sheet: aging-23-016299-s008
Supplementary Table 7. Cell type specific positive TFs.
GeneIntegrationMatrix_name	MotifMatrix_name	cor	padj	pval	GeneIntegrationMatrix_seqnames	GeneIntegrationMatrix_start	GeneIntegrationMatrix_end	GeneIntegrationMatrix_strand	GeneIntegrationMatrix_idx	GeneIntegrationMatrix_matchName	MotifMatrix_seqnames	MotifMatrix_idx	MotifMatrix_matchName	maxDelta	TFRegulator
Runx3	Runx3_858	0.925625614	1.80E-207	3.48E-210	chr4	135120645	135177990	1	705	Runx3	z	858	Runx3	1659119402	YES
Runx1	Runx1_712	0.890114661	1.16E-167	2.25E-170	chr16	92826074	92601466	2	449	Runx1	z	712	Runx1	1659119402	YES
Cebpb	Cebpb_130	0.885164588	3.18E-163	6.17E-166	chr2	167688915	167690432	1	1077	Cebpb	z	130	Cebpb	5889976354	YES
Elf2	Elf2_286	0.882426083	7.44E-161	1.44E-163	chr3	51340644	51252720	2	125	Elf2	z	286	Elf2	7648201009	YES
Fli1	Fli1_277	0.865021326	4.62E-147	8.95E-150	chr9	32541452	32422204	2	151	Fli1	z	277	Fli1	1039675081	YES	T cell
Elf1	Elf1_285	0.864739094	7.45E-147	1.44E-149	chr14	79481194	79582491	1	451	Elf1	z	285	Elf1	2166285169	YES
Elf4	Elf4_283	0.849535336	2.55E-136	4.95E-139	chrX	48463132	48411049	2	126	Elf4	z	283	Elf4	8750873007	YES
Nfkb2	Nfkb2_699	0.844410663	4.99E-133	9.67E-136	chr19	46304737	46312385	1	465	Nfkb2	z	699	Nfkb2	6046764247	YES
Irf2	Irf2_636	0.831954501	1.67E-125	3.24E-128	chr8	46739745	46847458	1	204	Irf2	z	636	Irf2	9747958901	YES
Irf1	Irf1_631	0.829595291	3.80E-124	7.36E-127	chr11	53770014	53778374	1	286	Irf1	z	631	Irf1	1356514574	YES
Eomes	Eomes_768	0.827331137	7.26E-123	1.41E-125	chr9	118478189	118486132	1	777	Eomes	z	768	Eomes	7145689043	YES
Batf3	Batf3_789	0.806314943	8.51E-112	1.65E-114	chr1	191097880	191108943	1	884	Batf3	z	789	Batf3	7556857243	YES
Prdm1	Prdm1_189	0.805809688	1.51E-111	2.93E-114	chr10	44528501	44437174	2	163	Prdm1	z	189	Prdm1	6634902325	YES
Ets1	Ets1_284	0.788604518	1.78E-103	3.46E-106	chr9	32636221	32757820	1	152	Ets1	z	284	Ets1	1112022946	YES
Klf2	Klf2_819	0.773297549	6.66E-97	1.29E-99	chr8	72319062	72321654	1	359	Klf2	z	819	Klf2	5539858299	YES
Irf5	Irf5_635	0.770893287	6.44E-96	1.25E-98	chr6	29526625	29541869	1	75	Irf5	z	635	Irf5	4845878147	YES
Hnf4a	Hnf4a_665	0.738709507	8.62E-84	1.67E-86	chr2	163506857	163572907	1	1010	Hnf4a	z	665	Hnf4a	5625489875	YES
Nr1h3	Nr1h3_655	0.732718603	9.92E-82	1.92E-84	chr2	91195116	91184061	2	501	Nr1h3	z	655	Nr1h3	960624426	YES
Irf7	Irf7_633	0.72861125	2.38E-80	4.62E-83	chr7	141266424	141263183	2	1107	Irf7	z	633	Irf7	5767717556	YES
Nfkb1	Nfkb1_701	0.727008245	8.12E-80	1.57E-82	chr3	135691547	135584655	2	674	Nfkb1	z	701	Nfkb1	5630666763	YES
Nfic	Nfic_724	0.720789352	8.68E-78	1.68E-80	chr10	81430794	81396191	2	438	Nfic	z	724	Nfic	5922931245	YES
Irf9	Irf9_629	0.700861792	1.21E-71	2.35E-74	chr14	55603985	55610030	1	251	Irf9	z	629	Irf9	4960090586	YES
Hnf1b	Hnf1b_426	0.677174289	5.69E-65	1.10E-67	chr11	83850869	83905917	1	713	Hnf1b	z	426	Hnf1b	493503538	YES
Klf3	Klf3_804	0.675321576	1.78E-64	3.45E-67	chr5	64803523	64830129	1	282	Klf3	z	804	Klf3	5539858299	YES
Irf4	Irf4_632	0.672042705	1.32E-63	2.55E-66	chr13	30749258	30766927	1	144	Irf4	z	632	Irf4	7018846394	YES
Rela	Rela_698	0.657790236	5.83E-60	1.13E-62	chr19	5637490	5648130	1	91	Rela	z	698	Rela	5245236308	YES
Batf	Batf_790	0.651423844	2.14E-58	4.16E-61	chr12	85686720	85709087	1	332	Batf	z	790	Batf	7556857243	YES
Klf6	Klf6_794	0.626761062	1.14E-52	2.20E-55	chr13	5861489	5870393	1	16	Klf6	z	794	Klf6	5539858299	YES
Elk3	Elk3_272	0.616429346	2.01E-50	3.90E-53	chr10	93311159	93247416	2	519	Elk3	z	272	Elk3	4994375909	YES
Spic	Spic_269	0.595603566	3.89E-46	7.55E-49	chr10	88683023	88675269	2	499	Spic	z	269	Spic	2494571449	YES
Runx2	Runx2_713	0.580423498	3.34E-43	6.46E-46	chr17	44814797	44603989	2	496	Runx2	z	713	Runx2	1532180347	YES
Klf12	Klf12_236	0.572127723	1.15E-41	2.23E-44	chr14	100149795	99870632	2	466	Klf12	z	236	Klf12	4921621625	YES
Elk4	Elk4_280	0.568862014	4.53E-41	8.77E-44	chr1	132007605	132032610	1	517	Elk4	z	280	Elk4	4940562052	YES
Bcl11a	Bcl11a_795	0.566999311	9.80E-41	1.90E-43	chr11	24078056	24173558	1	127	Bcl11a	z	795	Bcl11a	2515703893	YES
Foxa1	Foxa1_306	0.565586916	1.76E-40	3.40E-43	chr12	57546121	57540631	2	164	Foxa1	z	306	Foxa1	7136802672	YES
Foxc1	Foxc1_320	0.55633068	7.48E-39	1.45E-41	chr13	31806646	31810635	1	149	Foxc1	z	320	Foxc1	4789720055	YES
Esrra	Esrra_674	0.542542835	1.62E-36	3.13E-39	chr19	6921808	6910977	2	139	Esrra	z	674	Esrra	8907419967	YES
Ets2	Ets2_828	0.542322028	1.76E-36	3.41E-39	chr16	95702407	95721049	1	465	Ets2	z	828	Ets2	8106459497	YES
Grhl1	Grhl1_390	0.523429998	1.87E-33	3.62E-36	chr12	24572287	24617391	1	69	Grhl1	z	390	Grhl1	8084280435	YES
Nfe2	Nfe2_132	0.511292169	1.31E-31	2.54E-34	chr15	103258403	103248212	2	600	Nfe2	z	132	Nfe2	97665773	YES
Nfix	Nfix_722	0.511081607	1.41E-31	2.73E-34	chr8	84800338	84704712	2	433	Nfix	z	722	Nfix	7452435	YES
Hoxd10	Hoxd10_551	0.899326652	1.61E-176	3.12E-179	chr2	74691891	74695106	1	432	Hoxd10	z	551	Hoxd10	1658050269	NO
Ikzf1	Ikzf1_149	-0.859054662	9.02E-143	1.75E-145	chr11	11685925	11772926	1	80	Ikzf1	z	149	Ikzf1	242325819	NO
Hoxb6	Hoxb6_394	0.834344562	6.74E-127	1.31E-129	chr11	96299171	96301569	1	835	Hoxb6	z	394	Hoxb6	2405650945	NO
Irf6	Irf6_634	-0.793207594	1.47E-105	2.85E-108	chr1	193153112	193172036	1	907	Irf6	z	634	Irf6	30912905	NO
Tcf7	Tcf7_726	0.77555039	7.75E-98	1.50E-100	chr11	52283014	52252283	2	270	Tcf7	z	726	Tcf7	3640891925	NO
Ahctf1	Ahctf1_13	0.768287836	7.30E-95	1.42E-97	chr1	179804015	179744904	2	821	Ahctf1	z	13	Ahctf1	142915238	NO
Hoxd11	Hoxd11_532	0.765460835	9.82E-94	1.90E-96	chr2	74679558	74687016	1	431	Hoxd11	z	532	Hoxd11	1154030153	NO
Zbtb7a	Zbtb7a_808	0.763255391	7.27E-93	1.41E-95	chr10	81136271	81151657	1	418	Zbtb7a	z	808	Zbtb7a	1741003106	NO
Hsf1	Hsf1_626	-0.76215895	1.95E-92	3.78E-95	chr15	76477445	76500972	1	241	Hsf1	z	626	Hsf1	124036365	NO
Nr1h2	Nr1h2_688	-0.757537544	1.18E-90	2.29E-93	chr7	44553965	44549616	2	448	Nr1h2	z	688	Nr1h2	960624426	NO
Atf1	Atf1_106	0.755095215	9.94E-90	1.93E-92	chr15	100227859	100261248	1	531	Atf1	z	106	Atf1	2736981565	NO
Rel	Rel_697	0.749393866	1.31E-87	2.53E-90	chr11	23770970	23741729	2	125	Rel	z	697	Rel	3784951859	NO
Klf7	Klf7_171	0.745551832	3.25E-86	6.29E-89	chr1	64121426	64035663	2	231	Klf7	z	171	Klf7	4549509194	NO
Hoxa7	Hoxa7_509	0.741424615	9.61E-85	1.86E-87	chr6	52220390	52215623	2	227	Hoxa7	z	509	Hoxa7	4235018742	NO
Atf4	Atf4_121	0.741280755	1.08E-84	2.09E-87	chr15	80255184	80257545	1	331	Atf4	z	121	Atf4	1249367427	NO
Cebpe	Cebpe_125	0.732901734	8.60E-82	1.67E-84	chr14	54712174	54710363	2	231	Cebpe	z	125	Cebpe	2380204014	NO
Mecom	Mecom_173	-0.732704439	1.00E-81	1.94E-84	chr3	30548008	29951296	2	62	Mecom	z	173	Mecom	1560777711	NO
Atf6b	Atf6b_100	0.718843329	3.65E-77	7.07E-80	chr17	34647146	34655074	1	382	Atf6b	z	100	Atf6b	2637831692	NO
Hoxb9	Hoxb9_428	0.715977474	2.96E-76	5.73E-79	chr11	96271330	96276595	1	831	Hoxb9	z	428	Hoxb9	2878800272	NO
Relb	Relb_856	0.715382219	4.55E-76	8.82E-79	chr7	19629438	19606222	2	159	Relb	z	856	Relb	3047335135	NO
Cic	Cic_728	-0.713639554	1.60E-75	3.10E-78	chr7	25267699	25294159	1	211	Cic	z	728	Cic	3524692358	NO
Sp4	Sp4_167	0.70597108	3.61E-73	7.00E-76	chr12	118301440	118231686	2	500	Sp4	z	167	Sp4	3203758577	NO
Lcor	Lcor_695	0.700834549	1.24E-71	2.39E-74	chr19	41482645	41559781	1	402	Lcor	z	695	Lcor	0.88877537	NO
Hnf1a	Hnf1a_470	0.695863509	3.51E-70	6.81E-73	chr5	114971062	114948980	2	559	Hnf1a	z	470	Hnf1a	4015546991	NO
Maf	Maf_793	0.694366927	9.50E-70	1.84E-72	chr8	115706894	115703253	2	674	Maf	z	793	Maf	4392569027	NO
Hivep2	Hivep2_797	0.678092407	3.22E-65	6.25E-68	chr10	13966077	14151378	1	46	Hivep2	z	797	Hivep2	336071757	NO
Arid5a	Arid5a_9	-0.674960709	2.22E-64	4.31E-67	chr1	36307733	36324029	1	81	Arid5a	z	9	Arid5a	2090101165	NO
Hoxd8	Hoxd8_460	0.674474441	2.99E-64	5.80E-67	chr2	74704615	74707933	1	434	Hoxd8	z	460	Hoxd8	2966248561	NO
Hoxd9	Hoxd9_534	0.672545154	9.70E-64	1.88E-66	chr2	74697763	74700208	1	433	Hoxd9	z	534	Hoxd9	1760269382	NO
Foxq1	Foxq1_309	0.668971191	8.36E-63	1.62E-65	chr13	31558170	31560976	1	147	Foxq1	z	309	Foxq1	1796865029	NO
Arid3b	Arid3b_6	-0.667804621	1.68E-62	3.25E-65	chr9	57836793	57790496	2	357	Arid3b	z	6	Arid3b	3822787071	NO
Gmeb2	Gmeb2_716	0.663773833	1.82E-61	3.52E-64	chr2	181287966	181251451	2	1159	Gmeb2	z	716	Gmeb2	2363754578	NO
Mef2c	Mef2c_638	0.661955175	5.26E-61	1.02E-63	chr13	83504034	83667079	1	453	Mef2c	z	638	Mef2c	4015929066	NO
Ddit3	Ddit3_788	0.66098114	9.26E-61	1.79E-63	chr10	127290793	127296288	1	649	Ddit3	z	788	Ddit3	0.883348759	NO
Egr2	Egr2_188	0.658700038	3.46E-60	6.70E-63	chr10	67537869	67542188	1	253	Egr2	z	188	Egr2	2075165134	NO
Mef2a	Mef2a_640	0.655053329	2.78E-59	5.38E-62	chr7	67372858	67231163	2	585	Mef2a	z	640	Mef2a	4305650596	NO
Pitx2	Pitx2_464	0.652018229	1.54E-58	2.98E-61	chr3	129199878	129219594	1	637	Pitx2	z	464	Pitx2	2634023244	NO
Hoxb7	Hoxb7_514	0.646890679	2.65E-57	5.14E-60	chr11	96286646	96290163	1	833	Hoxb7	z	514	Hoxb7	2966248561	NO
Pou3f3	Pou3f3_540	0.645501978	5.68E-57	1.10E-59	chr1	42697146	42700210	1	129	Pou3f3	z	540	Pou3f3	1973916756	NO
Sox12	Sox12_741	-0.642868906	2.38E-56	4.61E-59	chr2	152398046	152393611	2	887	Sox12	z	741	Sox12	1158180831	NO
Tbx21	Tbx21_762	0.639622405	1.37E-55	2.65E-58	chr11	97115331	97098007	2	854	Tbx21	z	762	Tbx21	2668621724	NO
Foxo6	Foxo6_321	0.633359002	3.76E-54	7.28E-57	chr4	120287261	120267078	2	509	Foxo6	z	321	Foxo6	3037823789	NO
Rara	Rara_685	-0.6284982	4.67E-53	9.05E-56	chr11	98937696	98974942	1	901	Rara	z	685	Rara	6524072692	NO
Mef2d	Mef2d_842	0.628243332	5.32E-53	1.03E-55	chr3	88142372	88172091	1	262	Mef2d	z	842	Mef2d	3700351674	NO
Pbx1	Pbx1_554	-0.626000968	1.67E-52	3.25E-55	chr1	168432169	168119364	2	721	Pbx1	z	554	Pbx1	1952234947	NO
Cenpb	Cenpb_243	-0.622433302	1.02E-51	1.97E-54	chr2	131180067	131177289	2	795	Cenpb	z	243	Cenpb	0.78557983	NO
Hoxc10	Hoxc10_440	0.617831875	1.01E-50	1.95E-53	chr15	102966796	102971898	1	590	Hoxc10	z	440	Hoxc10	3423367341	NO
Rxrg	Rxrg_661	0.610653957	3.35E-49	6.48E-52	chr1	167598362	167639623	1	720	Rxrg	z	661	Rxrg	1481501228	NO
Hlx	Hlx_518	-0.60573532	3.50E-48	6.79E-51	chr1	184732493	184727143	2	856	Hlx	z	518	Hlx	5916771979	NO
Atf3	Atf3_110	0.604832354	5.37E-48	1.04E-50	chr1	191218039	191170296	2	886	Atf3	z	110	Atf3	3765263031	NO
Etv1	Etv1_268	-0.599362844	6.92E-47	1.34E-49	chr12	38780258	38868215	1	120	Etv1	z	268	Etv1	4955552726	NO
Zfp263	Zfp263_878	0.598631884	9.69E-47	1.88E-49	chr16	3744099	3750788	1	2	Zfp263	z	878	Zfp263	4121937006	NO
Hoxc8	Hoxc8_405	0.588472343	9.71E-45	1.88E-47	chr15	102990539	102994254	1	592	Hoxc8	z	405	Hoxc8	4111727099	NO
Gata3	Gata3_384	0.587421419	1.55E-44	3.00E-47	chr2	9878600	9857078	2	30	Gata3	z	384	Gata3	412914313	NO
Smarcc2	Smarcc2_646	0.586953052	1.91E-44	3.70E-47	chr10	128459236	128490174	1	686	Smarcc2	z	646	Smarcc2	2158298	NO
Foxj3	Foxj3_303	0.58422404	6.36E-44	1.23E-46	chr4	119539661	119629119	1	505	Foxj3	z	303	Foxj3	3654321828	NO
Sp3	Sp3_802	0.583317417	9.46E-44	1.83E-46	chr2	72980446	72936430	2	418	Sp3	z	802	Sp3	3172810238	NO
Mecp2	Mecp2_642	0.571396116	1.57E-41	3.04E-44	chrX	74085690	74026592	2	205	Mecp2	z	642	Mecp2	1132721843	NO
Foxo3	Foxo3_319	0.562827346	5.44E-40	1.05E-42	chr10	42276742	42185786	2	148	Foxo3	z	319	Foxo3	2872502838	NO
Zfp652	Zfp652_239	-0.562674535	5.79E-40	1.12E-42	chr11	95749000	95764715	1	822	Zfp652	z	239	Zfp652	304829841	NO
Klf13	Klf13_817	0.561942159	7.80E-40	1.51E-42	chr7	63938915	63886351	2	564	Klf13	z	817	Klf13	3367565538	NO
Hivep3	Hivep3_803	0.556368465	7.37E-39	1.43E-41	chr4	119733784	120135411	1	508	Hivep3	z	803	Hivep3	336071757	NO
Sp110	Sp110_718	-0.554428701	1.59E-38	3.09E-41	chr1	85603891	85576899	2	339	Sp110	z	718	Sp110	240727724	NO
Smad4	Smad4_860	0.553210927	2.58E-38	5.00E-41	chr18	73703741	73639013	2	320	Smad4	z	860	Smad4	0.641653631	NO
Meis2	Meis2_461	0.551811458	4.48E-38	8.68E-41	chr2	116067444	115861264	2	607	Meis2	z	461	Meis2	2949071187	NO
Emx1	Emx1_491	0.548905607	1.39E-37	2.70E-40	chr6	85187931	85204463	1	368	Emx1	z	491	Emx1	3857931431	NO
Crem	Crem_134	0.536912784	1.35E-35	2.62E-38	chr18	3337589	3266354	2	1	Crem	z	134	Crem	3741172587	NO
Tbp	Tbp_772	0.535312178	2.45E-35	4.76E-38	chr17	15499888	15517427	1	69	Tbp	z	772	Tbp	1671864862	NO
Etv5	Etv5_276	-0.535272689	2.49E-35	4.83E-38	chr16	22439570	22381313	2	178	Etv5	z	276	Etv5	4873987193	NO
Fosl2	Fosl2_113	0.534133303	3.80E-35	7.37E-38	chr5	32136472	32157840	1	156	Fosl2	z	113	Fosl2	3087063297	NO
Atf7	Atf7_124	0.531794013	9.01E-35	1.75E-37	chr15	102625464	102523839	2	585	Atf7	z	124	Atf7	4555986147	NO
Mbd1	Mbd1_248	0.530061961	1.70E-34	3.29E-37	chr18	74268288	74282684	1	328	Mbd1	z	248	Mbd1	1086805	NO
Mafk	Mafk_102	-0.529025667	2.48E-34	4.80E-37	chr5	139791536	139802652	1	850	Mafk	z	102	Mafk	1645251271	NO
Creb3l2	Creb3l2_118	-0.521282528	4.01E-33	7.77E-36	chr6	37442148	37331021	2	117	Creb3l2	z	118	Creb3l2	1317859178	NO
Lhx1	Lhx1_422	0.517420231	1.56E-32	3.03E-35	chr11	84525534	84519379	2	720	Lhx1	z	422	Lhx1	4384873121	NO
Tcf7l1	Tcf7l1_744	-0.511280528	1.31E-31	2.55E-34	chr6	72789045	72626371	2	317	Tcf7l1	z	744	Tcf7l1	3588308437	NO
Rreb1	Rreb1_192	-0.50471178	1.22E-30	2.37E-33	chr13	37826038	37952005	1	178	Rreb1	z	192	Rreb1	687962995	NO
Setbp1	Setbp1_12	0.504539831	1.29E-30	2.51E-33	chr18	79109391	78750378	2	352	Setbp1	z	12	Setbp1	0.622719819	NO
Trp53	Trp53_692	-0.503162503	2.05E-30	3.98E-33	chr11	69580359	69591873	1	458	Trp53	z	692	Trp53	1784225841	NO
Egr3	Egr3_183	0.502699436	2.40E-30	4.64E-33	chr14	70077445	70082613	1	391	Egr3	z	183	Egr3	2823393991	NO
Tgif1	Tgif1_542	0.502554335	2.52E-30	4.88E-33	chr17	70853532	70844205	2	674	Tgif1	z	542	Tgif1	2851454391	NO
Irx3	Irx3_483	0.50109249	4.09E-30	7.93E-33	chr8	91801654	91798511	2	487	Irx3	z	483	Irx3	0.930189191	NO
Mypop	Mypop_649	-0.497543628	1.32E-29	2.56E-32	chr7	18991245	19001766	1	129	Mypop	z	649	Mypop	0.956323922	NO
Vdr	Vdr_671	0.496044514	2.15E-29	4.17E-32	chr15	97908296	97854427	2	480	Vdr	z	671	Vdr	2553073666	NO
Yy1	Yy1_154	0.495206167	2.83E-29	5.49E-32	chr12	108793311	108816632	1	436	Yy1	z	154	Yy1	3890283744	NO
Ybx2	Ybx2_821	-0.492043362	7.88E-29	1.53E-31	chr11	69935899	69941599	1	486	Ybx2	z	821	Ybx2	0.609772512	NO
Usf1	Usf1_46	0.491001815	1.10E-28	2.14E-31	chr1	171411313	171418759	1	759	Usf1	z	46	Usf1	1765904951	NO
Nr4a1	Nr4a1_847	-0.490310472	1.38E-28	2.66E-31	chr15	101266846	101274795	1	554	Nr4a1	z	847	Nr4a1	7437403885	NO
Nr2f6	Nr2f6_657	0.48960323	1.72E-28	3.34E-31	chr8	71381952	71374119	2	325	Nr2f6	z	657	Nr2f6	719771825	NO
Maz	Maz_807	-0.483936135	1.04E-27	2.01E-30	chr7	127027019	127022134	2	965	Maz	z	807	Maz	2305573018	NO
Spib	Spib_271	0.482111722	1.83E-27	3.55E-30	chr7	44532071	44525995	2	446	Spib	z	271	Spib	1650090486	NO
Pou6f1	Pou6f1_416	0.478788701	5.14E-27	9.95E-30	chr15	100599984	100575318	2	540	Pou6f1	z	416	Pou6f1	3500381478	NO
Gm5294	Gm5294_334	0.475946961	1.23E-26	2.38E-29	chr5	138820080	138821619	1	834	Gm5294	z	334	Gm5294	5824172467	NO
Hoxd3	Hoxd3_583	0.471061189	5.40E-26	1.05E-28	chr2	74711993	74748271	1	435	Hoxd3	z	583	Hoxd3	3805191125	NO
Nr1d1	Nr1d1_844	-0.470727491	5.97E-26	1.16E-28	chr11	98775377	98767932	2	894	Nr1d1	z	844	Nr1d1	2143137169	NO
Hlf	Hlf_99	0.47068097	6.05E-26	1.17E-28	chr11	90390917	90336535	2	782	Hlf	z	99	Hlf	2157414919	NO
Zfp354c	Zfp354c_202	-0.467995735	1.35E-25	2.62E-28	chr11	50827731	50811085	2	246	Zfp354c	z	202	Zfp354c	1935413721	NO
Hic1	Hic1_198	-0.467378366	1.62E-25	3.14E-28	chr11	75170255	75164565	2	578	Hic1	z	198	Hic1	188208602	NO
Id1	Id1_74	0.465343404	2.96E-25	5.74E-28	chr2	152736251	152737410	1	897	Id1	z	74	Id1	1202685296	NO
Zkscan3	Zkscan3_156	0.465168384	3.12E-25	6.04E-28	chr13	21402755	21387004	2	63	Zkscan3	z	156	Zkscan3	0.320617503	NO
Rarb	Rarb_663	0.46434966	3.97E-25	7.69E-28	chr14	17082331	16430839	2	28	Rarb	z	663	Rarb	5942622682	NO
Bcl6	Bcl6_162	-0.462993638	5.91E-25	1.14E-27	chr16	23988612	23965052	2	192	Bcl6	z	162	Bcl6	2132801554	NO
Stat2	Stat2_758	0.462273034	7.29E-25	1.41E-27	chr10	128270576	128292849	1	676	Stat2	z	758	Stat2	1466192102	NO
Cebpg	Cebpg_129	0.461160267	1.01E-24	1.95E-27	chr7	35056566	35046422	2	381	Cebpg	z	129	Cebpg	6185213332	NO
Fosl1	Fosl1_107	0.456906119	3.45E-24	6.68E-27	chr19	5447698	5455938	1	78	Fosl1	z	107	Fosl1	1145930095	NO
Trp63	Trp63_853	0.455495027	5.16E-24	1.00E-26	chr16	25683765	25892088	1	197	Trp63	z	853	Trp63	8779294305	NO
Egr1	Egr1_190	0.455204318	5.61E-24	1.09E-26	chr18	34861207	34864956	1	119	Egr1	z	190	Egr1	2114875331	NO
Esr1	Esr1_666	-0.454238372	7.38E-24	1.43E-26	chr10	4611989	5005633	1	10	Esr1	z	666	Esr1	3697326962	NO
Etv3	Etv3_267	0.449474564	2.83E-23	5.49E-26	chr3	87525578	87540158	1	246	Etv3	z	267	Etv3	8014416154	NO
Junb	Junb_127	0.445676769	8.14E-23	1.58E-25	chr8	84978748	84976909	2	446	Junb	z	127	Junb	1541705312	NO
Nr4a3	Nr4a3_679	-0.443482146	1.49E-22	2.89E-25	chr4	48045305	48086446	1	199	Nr4a3	z	679	Nr4a3	9222804167	NO
Zfp263	Zfp263_876	0.438525746	5.74E-22	1.11E-24	chr16	3744099	3750788	1	2	Zfp263	z	876	Zfp263	2127186064	NO
Tead3	Tead3_867	0.438470841	5.82E-22	1.13E-24	chr17	28350805	28331671	2	248	Tead3	z	867	Tead3	6012143121	NO
Klf8	Klf8_194	0.438116834	6.41E-22	1.24E-24	chrX	153238045	153396134	1	442	Klf8	z	194	Klf8	5500011423	NO
E4f1	E4f1_873	0.437599723	7.37E-22	1.43E-24	chr17	24455392	24443778	2	134	E4f1	z	873	E4f1	2896329815	NO
Emx2	Emx2_535	0.437519041	7.53E-22	1.46E-24	chr19	59458690	59465357	1	536	Emx2	z	535	Emx2	3702766596	NO
Gm5294	Gm5294_332	0.433141412	2.42E-21	4.70E-24	chr5	138820080	138821619	1	834	Gm5294	z	332	Gm5294	6010860664	NO
Gm5294	Gm5294_343	0.425424291	1.83E-20	3.54E-23	chr5	138820080	138821619	1	834	Gm5294	z	343	Gm5294	4331717343	NO
Sp1	Sp1_142	0.42354435	2.96E-20	5.74E-23	chr15	102406316	102436404	1	578	Sp1	z	142	Sp1	2899036596	NO
Nfatc2	Nfatc2_700	0.422540367	3.83E-20	7.43E-23	chr2	168601657	168476410	2	1086	Nfatc2	z	700	Nfatc2	2350295686	NO
Elk1	Elk1_274	0.419591721	8.12E-20	1.57E-22	chrX	20950608	20933395	2	80	Elk1	z	274	Elk1	490059051	NO
Hmbox1	Hmbox1_438	0.417348132	1.43E-19	2.77E-22	chr14	64949847	64811601	2	347	Hmbox1	z	438	Hmbox1	4168037291	NO
Hoxb8	Hoxb8_560	0.41599295	2.01E-19	3.90E-22	chr11	96281905	96285325	1	832	Hoxb8	z	560	Hoxb8	4267511693	NO
Nfya	Nfya_242	0.415924078	2.05E-19	3.96E-22	chr17	48409820	48386885	2	574	Nfya	z	242	Nfya	4226685723	NO
Meis1	Meis1_425	0.415363932	2.35E-19	4.56E-22	chr11	19018969	18880428	2	97	Meis1	z	425	Meis1	30481263	NO
Rxra	Rxra_662	0.411102532	6.77E-19	1.31E-21	chr2	27677201	27763319	1	173	Rxra	z	662	Rxra	3247113033	NO
Foxm1	Foxm1_880	0.40969584	9.57E-19	1.85E-21	chr6	128362994	128375886	1	670	Foxm1	z	880	Foxm1	2185416786	NO
Klf16	Klf16_874	0.409545545	9.93E-19	1.92E-21	chr10	80577296	80567121	2	391	Klf16	z	874	Klf16	3367565538	NO
Zeb1	Zeb1_139	-0.407659607	1.57E-18	3.05E-21	chr18	5591860	5775468	1	9	Zeb1	z	139	Zeb1	8046994606	NO
Six5	Six5_837	-0.407643879	1.58E-18	3.06E-21	chr7	19094544	19098345	1	134	Six5	z	837	Six5	1630744984	NO
Arid5b	Arid5b_8	0.400780063	8.24E-18	1.60E-20	chr10	68278726	68095593	2	255	Arid5b	z	8	Arid5b	0.549231539	NO
Hoxd4	Hoxd4_531	0.40064178	8.51E-18	1.65E-20	chr2	74721978	74729160	1	437	Hoxd4	z	531	Hoxd4	2193536061	NO
Rbpj	Rbpj_824	0.399786921	1.04E-17	2.02E-20	chr5	53555779	53657445	1	270	Rbpj	z	824	Rbpj	1604932858	NO
Gm5294	Gm5294_331	0.399370164	1.15E-17	2.23E-20	chr5	138820080	138821619	1	834	Gm5294	z	331	Gm5294	558111487	NO
Gata2	Gata2_383	0.399081365	1.23E-17	2.39E-20	chr6	88193891	88207032	1	412	Gata2	z	383	Gata2	587523082	NO
Pax2	Pax2_612	-0.398511372	1.41E-17	2.73E-20	chr19	44757394	44837871	1	444	Pax2	z	612	Pax2	1321082847	NO
Gata4	Gata4_386	0.398310529	1.48E-17	2.87E-20	chr14	63271692	63198914	2	337	Gata4	z	386	Gata4	5270096958	NO
Zkscan5	Zkscan5_217	-0.393601318	4.45E-17	8.62E-20	chr5	145204559	145221750	1	910	Zkscan5	z	217	Zkscan5	1001032057	NO
Zfp105	Zfp105_218	0.393370016	4.69E-17	9.10E-20	chr9	122923078	122931028	1	827	Zfp105	z	218	Zfp105	161096212	NO
Xbp1	Xbp1_103	0.393202586	4.88E-17	9.46E-20	chr11	5520641	5525993	1	45	Xbp1	z	103	Xbp1	2565145558	NO
Gm5294	Gm5294_339	0.393005329	5.11E-17	9.90E-20	chr5	138820080	138821619	1	834	Gm5294	z	339	Gm5294	318658481	NO
Hoxa2	Hoxa2_420	0.389997716	1.02E-16	1.98E-19	chr6	52164831	52162417	2	220	Hoxa2	z	420	Hoxa2	4055321157	NO
E2f3	E2f3_258	-0.388239916	1.53E-16	2.96E-19	chr13	29986063	29906575	2	139	E2f3	z	258	E2f3	1028627287	NO
Pou2f2	Pou2f2_616	-0.382402193	5.70E-16	1.10E-18	chr7	25132460	25091114	2	204	Pou2f2	z	616	Pou2f2	1826580209	NO
Erf	Erf_288	-0.382254526	5.89E-16	1.14E-18	chr7	25250758	25242560	2	210	Erf	z	288	Erf	1131460907	NO
Klf9	Klf9_184	-0.37947479	1.09E-15	2.12E-18	chr19	23141226	23166911	1	283	Klf9	z	184	Klf9	1399838699	NO
Rfx5	Rfx5_704	0.379474779	1.09E-15	2.12E-18	chr3	94954135	94961561	1	383	Rfx5	z	704	Rfx5	2823548741	NO
Kdm2b	Kdm2b_249	0.377999844	1.51E-15	2.93E-18	chr5	122989099	122870668	2	656	Kdm2b	z	249	Kdm2b	0.871182043	NO
Foxo1	Foxo1_314	-0.377515589	1.68E-15	3.26E-18	chr3	52268337	52350109	1	133	Foxo1	z	314	Foxo1	3095368285	NO
Gmeb1	Gmeb1_715	0.377012693	1.88E-15	3.64E-18	chr4	132261549	132221025	2	640	Gmeb1	z	715	Gmeb1	2856993728	NO
Creb3l3	Creb3l3_116	0.376932463	1.91E-15	3.70E-18	chr10	81098872	81084333	2	416	Creb3l3	z	116	Creb3l3	4563062597	NO
Hoxc4	Hoxc4_581	0.374576184	3.20E-15	6.20E-18	chr15	103018936	103036852	1	595	Hoxc4	z	581	Hoxc4	8202780694	NO
Nfat5	Nfat5_696	0.37182276	5.80E-15	1.12E-17	chr8	107293470	107379517	1	623	Nfat5	z	696	Nfat5	2595326218	NO
Sp2	Sp2_150	0.367516486	1.46E-14	2.82E-17	chr11	96977688	96953337	2	848	Sp2	z	150	Sp2	274695122	NO
Zfp263	Zfp263_163	-0.366079382	1.97E-14	3.83E-17	chr16	3744099	3750788	1	2	Zfp263	z	163	Zfp263	1437345518	NO
Zfp263	Zfp263_877	-0.366079382	1.97E-14	3.83E-17	chr16	3744099	3750788	1	2	Zfp263	z	877	Zfp263	1437345518	NO
Nfil3	Nfil3_131	0.365097679	2.43E-14	4.70E-17	chr13	52981039	52967209	2	264	Nfil3	z	131	Nfil3	2197737467	NO
Gm5294	Gm5294_352	0.364137828	2.97E-14	5.75E-17	chr5	138820080	138821619	1	834	Gm5294	z	352	Gm5294	1903489761	NO
Zfp202	Zfp202_169	-0.363959512	3.08E-14	5.97E-17	chr9	40192316	40213604	1	185	Zfp202	z	169	Zfp202	1490677117	NO
Esrrb	Esrrb_669	0.363063822	3.72E-14	7.20E-17	chr12	86361117	86521628	1	337	Esrrb	z	669	Esrrb	100310543	NO
Stat5b	Stat5b_756	-0.357936667	1.07E-13	2.08E-16	chr11	100850585	100780731	2	935	Stat5b	z	756	Stat5b	2532384355	NO
Glis3	Glis3_818	-0.356094938	1.57E-13	3.03E-16	chr19	28680077	28258851	2	304	Glis3	z	818	Glis3	1496224981	NO
Klf4	Klf4_143	0.355342508	1.82E-13	3.54E-16	chr4	55532475	55527137	2	228	Klf4	z	143	Klf4	5933087419	NO
Nfatc4	Nfatc4_857	0.354396041	2.21E-13	4.28E-16	chr14	55824795	55833943	1	269	Nfatc4	z	857	Nfatc4	2485665633	NO
Creb1	Creb1_109	0.352884903	3.00E-13	5.81E-16	chr1	64532804	64604548	1	232	Creb1	z	109	Creb1	4038382989	NO
Foxp1	Foxp1_302	0.350879926	4.49E-13	8.69E-16	chr6	99520993	98925342	2	469	Foxp1	z	302	Foxp1	4230429866	NO
Mycn	Mycn_65	-0.350131318	5.21E-13	1.01E-15	chr12	12941836	12936093	2	42	Mycn	z	65	Mycn	0.526847427	NO
Klf10	Klf10_810	0.349853383	5.51E-13	1.07E-15	chr15	38300711	38291464	2	97	Klf10	z	810	Klf10	2928015205	NO
Hoxb2	Hoxb2_582	0.346975265	9.74E-13	1.89E-15	chr11	96351632	96354016	1	839	Hoxb2	z	582	Hoxb2	2501700621	NO
Tef	Tef_105	0.345543359	1.29E-12	2.50E-15	chr15	81802673	81826863	1	350	Tef	z	105	Tef	2047397589	NO
Klf11	Klf11_798	0.345321255	1.35E-12	2.61E-15	chr12	24651371	24662782	1	70	Klf11	z	798	Klf11	3367565538	NO
Jdp2	Jdp2_114	0.344118884	1.71E-12	3.31E-15	chr12	85599105	85639878	1	331	Jdp2	z	114	Jdp2	4062535043	NO
Nfib	Nfib_859	0.343757433	1.83E-12	3.55E-15	chr4	82505779	82290173	2	290	Nfib	z	859	Nfib	4507374837	NO
Pou2f1	Pou2f1_619	-0.343233694	2.03E-12	3.93E-15	chr1	166002634	165865154	2	709	Pou2f1	z	619	Pou2f1	5628231834	NO
Crebzf	Crebzf_122	0.342773543	2.22E-12	4.30E-15	chr7	90442781	90448043	1	688	Crebzf	z	122	Crebzf	1111416629	NO
E2f1	E2f1_261	-0.341185882	3.02E-12	5.85E-15	chr2	154569892	154559400	2	920	E2f1	z	261	E2f1	0.99595203	NO
Sp140	Sp140_717	0.339033516	4.57E-12	8.85E-15	chr1	85600703	85645037	1	340	Sp140	z	717	Sp140	0.797390688	NO
Gm5294	Gm5294_351	0.338784729	4.79E-12	9.28E-15	chr5	138820080	138821619	1	834	Gm5294	z	351	Gm5294	1580554343	NO
Id2	Id2_33	0.337865715	5.71E-12	1.11E-14	chr12	25096092	25093799	2	75	Id2	z	33	Id2	1202685296	NO
Zscan20	Zscan20_226	0.337079562	6.63E-12	1.29E-14	chr4	128610098	128583539	2	585	Zscan20	z	226	Zscan20	0.935614991	NO
Tgif2	Tgif2_566	0.336292078	7.70E-12	1.49E-14	chr2	156840007	156855570	1	962	Tgif2	z	566	Tgif2	2918426671	NO
E2f6	E2f6_264	0.332996445	1.43E-11	2.78E-14	chr12	16810965	16826752	1	49	E2f6	z	264	E2f6	1659676966	NO
E2f2	E2f2_259	0.331570472	1.87E-11	3.63E-14	chr4	136172274	136196057	1	726	E2f2	z	259	E2f2	0.907513717	NO
Nfe2l1	Nfe2l1_117	-0.331064093	2.06E-11	3.99E-14	chr11	96829968	96817414	2	843	Nfe2l1	z	117	Nfe2l1	1730366115	NO
Zfx	Zfx_240	-0.331057631	2.06E-11	3.99E-14	chrX	94123407	94074631	2	247	Zfx	z	240	Zfx	1396513879	NO
Cdc5l	Cdc5l_645	-0.328761154	3.15E-11	6.11E-14	chr17	45433707	45391887	2	498	Cdc5l	z	645	Cdc5l	0.939576577	NO
Fosb	Fosb_98	-0.327384712	4.07E-11	7.88E-14	chr7	19310045	19302696	2	144	Fosb	z	98	Fosb	1589894889	NO
Zfp219	Zfp219_816	-0.325795225	5.44E-11	1.05E-13	chr14	52020733	52006075	2	205	Zfp219	z	816	Zfp219	2421300013	NO
Clock	Clock_52	-0.325718393	5.52E-11	1.07E-13	chr5	76304792	76209868	2	337	Clock	z	52	Clock	0.824349721	NO
Cxxc1	Cxxc1_247	0.324408021	7.00E-11	1.36E-13	chr18	74216212	74221491	1	327	Cxxc1	z	247	Cxxc1	122529469	NO
Rora	Rora_682	0.323126631	8.83E-11	1.71E-13	chr9	68653786	69388246	1	449	Rora	z	682	Rora	2791086334	NO
Dbp	Dbp_133	0.321689678	1.14E-10	2.22E-13	chr7	45705247	45710203	1	504	Dbp	z	133	Dbp	2800506551	NO
Sox9	Sox9_725	-0.320580155	1.40E-10	2.71E-13	chr11	112782210	112787757	1	1088	Sox9	z	725	Sox9	1465110439	NO
Spdef	Spdef_279	-0.318365441	2.07E-10	4.02E-13	chr17	27728951	27714447	2	235	Spdef	z	279	Spdef	3776645214	NO
Id3	Id3_22	0.318057321	2.19E-10	4.25E-13	chr4	136143822	136145392	1	725	Id3	z	22	Id3	1136743586	NO
Mbtps2	Mbtps2_813	0.316323723	2.98E-10	5.77E-13	chrX	157598715	157535371	2	452	Mbtps2	z	813	Mbtps2	3935797241	NO
Tbx2	Tbx2_760	-0.314284349	4.26E-10	8.26E-13	chr11	85832615	85841948	1	737	Tbx2	z	760	Tbx2	6573497313	NO
Nr3c2	Nr3c2_681	-0.312994521	5.34E-10	1.03E-12	chr8	76902508	77243639	1	375	Nr3c2	z	681	Nr3c2	0.763852555	NO
Sp5	Sp5_238	-0.312842654	5.48E-10	1.06E-12	chr2	70474923	70477726	1	401	Sp5	z	238	Sp5	3210431908	NO
Sim1	Sim1_30	0.312493757	5.82E-10	1.13E-12	chr10	50895651	50989152	1	168	Sim1	z	30	Sim1	1030334938	NO
Sim2	Sim2_92	0.308796119	1.10E-09	2.14E-12	chr16	94085260	94127032	1	457	Sim2	z	92	Sim2	1030334938	NO
Hoxc9	Hoxc9_503	0.307006648	1.50E-09	2.90E-12	chr15	102977032	102984444	1	591	Hoxc9	z	503	Hoxc9	4291647725	NO
Gm5294	Gm5294_336	0.305890527	1.81E-09	3.50E-12	chr5	138820080	138821619	1	834	Gm5294	z	336	Gm5294	3849741616	NO
Nr2c1	Nr2c1_660	-0.305702649	1.87E-09	3.62E-12	chr10	94147931	94197214	1	528	Nr2c1	z	660	Nr2c1	5756854406	NO
Nobox	Nobox_476	0.305700034	1.87E-09	3.62E-12	chr6	43309554	43303674	2	165	Nobox	z	476	Nobox	2255274467	NO
Jun	Jun_126	0.299884791	4.95E-09	9.59E-12	chr4	95052222	95049036	2	323	Jun	z	126	Jun	7331592649	NO
Dmrta2	Dmrta2_879	0.297327721	7.54E-09	1.46E-11	chr4	109978025	109983684	1	414	Dmrta2	z	879	Dmrta2	0.860391043	NO
Id4	Id4_35	0.295896619	9.53E-09	1.85E-11	chr13	48261427	48264036	1	229	Id4	z	35	Id4	1136743586	NO
Mybl1	Mybl1_647	0.295652443	9.92E-09	1.92E-11	chr1	9700209	9667411	2	11	Mybl1	z	647	Mybl1	1143906285	NO
Mafg	Mafg_123	0.293175527	1.48E-08	2.87E-11	chr11	120633547	120628348	2	1233	Mafg	z	123	Mafg	3571052042	NO
Mafb	Mafb_136	-0.292190489	1.74E-08	3.37E-11	chr2	160367065	160363677	2	992	Mafb	z	136	Mafb	3690778544	NO
Mtf1	Mtf1_175	0.289253238	2.78E-08	5.38E-11	chr4	124802549	124849800	1	544	Mtf1	z	175	Mtf1	1265558619	NO
Ovol1	Ovol1_166	0.287351717	3.75E-08	7.27E-11	chr19	5560575	5549137	2	87	Ovol1	z	166	Ovol1	0.814072468	NO
Hmg20b	Hmg20b_729	0.287258437	3.81E-08	7.38E-11	chr10	81350457	81346046	2	432	Hmg20b	z	729	Hmg20b	1767361511	NO
Meis3	Meis3_525	0.286659766	4.19E-08	8.11E-11	chr7	16175395	16186510	1	100	Meis3	z	525	Meis3	3040837582	NO
Atf6	Atf6_111	0.283812894	6.53E-08	1.27E-10	chr1	170867771	170704457	2	734	Atf6	z	111	Atf6	2637831692	NO
Hbp1	Hbp1_727	-0.28134098	9.58E-08	1.86E-10	chr12	31950535	31926455	2	97	Hbp1	z	727	Hbp1	0.798817779	NO
Smarcc1	Smarcc1_843	-0.279939527	1.19E-07	2.30E-10	chr9	110132024	110240178	1	733	Smarcc1	z	843	Smarcc1	257046675	NO
Rfx3	Rfx3_710	0.279893375	1.20E-07	2.32E-10	chr19	28011166	27761721	2	303	Rfx3	z	710	Rfx3	2979970382	NO
Mlxip	Mlxip_70	-0.279087719	1.35E-07	2.62E-10	chr5	123394798	123457932	1	665	Mlxip	z	70	Mlxip	0.727264299	NO
Prdm11	Prdm11_650	0.275995001	2.16E-07	4.19E-10	chr2	93046144	92974906	2	527	Prdm11	z	650	Prdm11	0.876297356	NO
Ahr	Ahr_28	0.27428881	2.79E-07	5.42E-10	chr12	35534989	35497979	2	111	Ahr	z	28	Ahr	0.781944598	NO
Zfp143	Zfp143_224	0.272652171	3.57E-07	6.91E-10	chr7	110061702	110095392	1	827	Zfp143	z	224	Zfp143	2595459823	NO
Osr2	Osr2_161	-0.271542764	4.21E-07	8.15E-10	chr15	35296112	35303305	1	81	Osr2	z	161	Osr2	1659708986	NO
Tfdp1	Tfdp1_256	0.271515209	4.22E-07	8.18E-10	chr8	13338751	13378448	1	68	Tfdp1	z	256	Tfdp1	1195117561	NO
Arid2	Arid2_11	-0.270737939	4.74E-07	9.18E-10	chr15	96287522	96405463	1	468	Arid2	z	11	Arid2	2281367231	NO
Etv6	Etv6_282	0.270158663	5.16E-07	1.00E-09	chr6	134035700	134270158	1	719	Etv6	z	282	Etv6	1332233216	NO
Zfp369	Zfp369_158	-0.26950736	5.68E-07	1.10E-09	chr13	65278854	65297795	1	362	Zfp369	z	158	Zfp369	1168115404	NO
Plagl1	Plagl1_152	0.266923493	8.28E-07	1.60E-09	chr10	13060504	13131694	1	39	Plagl1	z	152	Plagl1	2106965581	NO
Zfp110	Zfp110_219	-0.266901779	8.31E-07	1.61E-09	chr7	12834810	12850584	1	80	Zfp110	z	219	Zfp110	1168115404	NO
Pknox1	Pknox1_414	-0.264521002	1.17E-06	2.27E-09	chr17	31564773	31607693	1	293	Pknox1	z	414	Pknox1	3750869357	NO
Bach1	Bach1_108	0.263876	1.29E-06	2.49E-09	chr16	87698954	87733346	1	419	Bach1	z	108	Bach1	2139958504	NO
Hoxa10	Hoxa10_395	-0.263177257	1.42E-06	2.75E-09	chr6	52240854	52231197	2	229	Hoxa10	z	395	Hoxa10	2784001215	NO
Tcf7l2	Tcf7l2_732	-0.262211619	1.63E-06	3.16E-09	chr19	55741810	55933655	1	513	Tcf7l2	z	732	Tcf7l2	4591887939	NO
Nr1d2	Nr1d2_845	0.260998069	1.94E-06	3.76E-09	chr14	18239106	18204056	2	30	Nr1d2	z	845	Nr1d2	2143137169	NO
Arntl	Arntl_89	0.253404139	5.59E-06	1.08E-08	chr7	113207465	113314126	1	846	Arntl	z	89	Arntl	1485333508	NO
Hoxc6	Hoxc6_406	0.253101771	5.82E-06	1.13E-08	chr15	102998714	103011881	1	593	Hoxc6	z	406	Hoxc6	4673002322	NO
Zfp3	Zfp3_200	0.251059733	7.70E-06	1.49E-08	chr11	70764447	70772928	1	527	Zfp3	z	200	Zfp3	0.997488869	NO
Nfil3	Nfil3_137	0.249199168	9.90E-06	1.92E-08	chr13	52981039	52967209	2	264	Nfil3	z	137	Nfil3	0.829295014	NO
Snai1	Snai1_197	0.247143197	1.30E-05	2.53E-08	chr2	167538195	167542814	1	1074	Snai1	z	197	Snai1	3144024198	NO
Zfp691	Zfp691_203	0.24713286	1.31E-05	2.53E-08	chr4	119174195	119169516	2	494	Zfp691	z	203	Zfp691	168273863	NO
Klf15	Klf15_806	-0.246824395	1.36E-05	2.64E-08	chr6	90462626	90475221	1	432	Klf15	z	806	Klf15	2020788332	NO
Zfp300	Zfp300_180	0.246717646	1.38E-05	2.68E-08	chrX	21089229	21079150	2	83	Zfp300	z	180	Zfp300	0.717473061	NO
Prdm4	Prdm4_186	0.242751179	2.33E-05	4.52E-08	chr10	85917142	85891966	2	478	Prdm4	z	186	Prdm4	1484792728	NO
Elf3	Elf3_266	-0.242710941	2.34E-05	4.54E-08	chr1	135258472	135253574	2	558	Elf3	z	266	Elf3	1971688467	NO
Npas2	Npas2_44	0.240078452	3.30E-05	6.40E-08	chr1	39194272	39363240	1	110	Npas2	z	44	Npas2	1297140182	NO
Zbtb12	Zbtb12_210	-0.240041593	3.32E-05	6.43E-08	chr17	34894559	34896844	1	391	Zbtb12	z	210	Zbtb12	0.545383268	NO
Foxk1	Foxk1_324	0.23825576	4.18E-05	8.10E-08	chr5	142401497	142462015	1	867	Foxk1	z	324	Foxk1	2872502838	NO
Smad3	Smad3_723	-0.236808644	5.03E-05	9.75E-08	chr9	63757994	63646767	2	401	Smad3	z	723	Smad3	1456834485	NO
Zbtb4	Zbtb4_151	-0.236725605	5.08E-05	9.85E-08	chr11	69765912	69784026	1	472	Zbtb4	z	151	Zbtb4	2176680131	NO
Mnt	Mnt_18	0.233676233	7.48E-05	1.45E-07	chr11	74830924	74845725	1	573	Mnt	z	18	Mnt	1368805437	NO
Zfp281	Zfp281_193	0.230068043	0.000117392	2.28E-07	chr1	136624901	136630391	1	578	Zfp281	z	193	Zfp281	2793145487	NO
Lhx5	Lhx5_471	0.229290721	0.000129231	2.50E-07	chr5	120431886	120441457	1	607	Lhx5	z	471	Lhx5	4384873121	NO
Nfe2l2	Nfe2l2_101	0.22840115	0.000144191	2.79E-07	chr2	75704663	75675513	2	440	Nfe2l2	z	101	Nfe2l2	8864065684	NO
Hoxa9	Hoxa9_508	-0.227543418	0.000160186	3.10E-07	chr6	52227370	52223097	2	228	Hoxa9	z	508	Hoxa9	2560317898	NO
Mbd2	Mbd2_641	-0.226845068	0.000174458	3.38E-07	chr18	70568292	70626131	1	318	Mbd2	z	641	Mbd2	1025605674	NO
Arid3a	Arid3a_7	-0.226251943	0.000187533	3.63E-07	chr10	79927043	79955018	1	359	Arid3a	z	7	Arid3a	2404387706	NO
Stat4	Stat4_759	0.225552901	0.000204155	3.96E-07	chr1	51987148	52107189	1	154	Stat4	z	759	Stat4	146713415	NO
Lef1	Lef1_734	0.223742098	0.000254067	4.92E-07	chr3	131110297	131224357	1	652	Lef1	z	734	Lef1	4746632123	NO
Nr2c2	Nr2c2_659	0.219081382	0.000442373	8.57E-07	chr6	92091418	92173058	1	451	Nr2c2	z	659	Nr2c2	4149011926	NO
Pbx4	Pbx4_486	-0.218637176	0.00046609	9.03E-07	chr8	69832704	69872292	1	270	Pbx4	z	486	Pbx4	0.854715333	NO
Nr4a2	Nr4a2_677	-0.217531875	0.000530519	1.03E-06	chr2	57124003	57107226	2	351	Nr4a2	z	677	Nr4a2	512497264	NO
Ppard	Ppard_656	-0.214988466	0.000712826	1.38E-06	chr17	28232754	28301469	1	245	Ppard	z	656	Ppard	929247664	NO
Foxo4	Foxo4_313	0.213576295	0.000838576	1.63E-06	chrX	101254528	101260873	1	282	Foxo4	z	313	Foxo4	3178313735	NO
Smad1	Smad1_863	0.21357159	0.000839028	1.63E-06	chr8	79399468	79338395	2	385	Smad1	z	863	Smad1	1315618424	NO
Stat1	Stat1_757	0.213038346	0.000891858	1.73E-06	chr1	52119438	52161865	1	155	Stat1	z	757	Stat1	1758809429	NO
Mybl2	Mybl2_643	0.20672132	0.001816856	3.52E-06	chr2	163054635	163084687	1	1003	Mybl2	z	643	Mybl2	1452404422	NO
Zfp384	Zfp384_811	0.204915933	0.002217723	4.30E-06	chr6	125009238	125037870	1	635	Zfp384	z	811	Zfp384	1601557727	NO
E2f5	E2f5_262	0.204896613	0.002222439	4.31E-06	chr3	14578671	14606309	1	27	E2f5	z	262	E2f5	1393291129	NO
Sp6	Sp6_191	-0.201066491	0.003372667	6.54E-06	chr11	97013569	97024738	1	849	Sp6	z	191	Sp6	3210431908	NO
Zfp740	Zfp740_204	-0.199845776	0.003845791	7.45E-06	chr15	102203645	102215610	1	570	Zfp740	z	204	Zfp740	2496279499	NO
Dmrta1	Dmrta1_253	0.19960516	0.00394623	7.65E-06	chr4	89688198	89694766	1	313	Dmrta1	z	253	Dmrta1	0.840642908	NO
Irx2	Irx2_400	-0.19810284	0.004632184	8.98E-06	chr13	72628797	72634196	1	406	Irx2	z	400	Irx2	0.965246003	NO
Osr1	Osr1_206	0.198018673	0.004673797	9.06E-06	chr12	9574442	9581500	1	35	Osr1	z	206	Osr1	1045705383	NO
Rest	Rest_805	0.197900912	0.004732616	9.17E-06	chr5	77265494	77283697	1	348	Rest	z	805	Rest	3316869428	NO
Mitf	Mitf_62	-0.197814332	0.00477631	9.26E-06	chr6	97807058	98021358	1	468	Mitf	z	62	Mitf	1519041632	NO
Naif1	Naif1_637	0.197003566	0.005204553	1.01E-05	chr2	32450457	32455476	1	253	Naif1	z	637	Naif1	1713197263	NO
Thrb	Thrb_846	-0.195769204	0.005927407	1.15E-05	chr14	17660960	18038088	1	29	Thrb	z	846	Thrb	1493588883	NO
Gm5294	Gm5294_333	0.192648874	0.008204858	1.59E-05	chr5	138820080	138821619	1	834	Gm5294	z	333	Gm5294	2964992527	NO
Tcf3	Tcf3_31	-0.192101642	0.008681678	1.68E-05	chr10	80433653	80409165	2	389	Tcf3	z	31	Tcf3	1165556405	NO
Gfi1b	Gfi1b_172	0.191965676	0.00880417	1.71E-05	chr2	28621982	28609450	2	183	Gfi1b	z	172	Gfi1b	2016015638	NO
Pknox2	Pknox2_501	-0.191063236	0.009659759	1.87E-05	chr9	37147322	36890979	2	170	Pknox2	z	501	Pknox2	2715837923	NO
Lin54	Lin54_246	0.190243243	0.010505143	2.04E-05	chr5	100500639	100442033	2	429	Lin54	z	246	Lin54	2067375815	NO
Hoxa3	Hoxa3_584	0.189693752	0.011110452	2.15E-05	chr6	52213067	52169062	2	222	Hoxa3	z	584	Hoxa3	5395820777	NO
Sp100	Sp100_714	0.189574398	0.011246235	2.18E-05	chr1	85649988	85709998	1	341	Sp100	z	714	Sp100	0.58977844	NO
Foxp3	Foxp3_311	0.188075238	0.013091581	2.54E-05	chrX	7579676	7595243	1	8	Foxp3	z	311	Foxp3	2872502838	NO
Stat3	Stat3_754	0.185444281	0.017043144	3.30E-05	chr11	100939540	100886806	2	937	Stat3	z	754	Stat3	2639833022	NO
Tbx10	Tbx10_770	-0.185407896	0.017104993	3.31E-05	chr19	3992752	3999512	1	16	Tbx10	z	770	Tbx10	6670035748	NO
Max	Max_91	-0.18416211	0.019355569	3.75E-05	chr12	76962248	76937269	2	246	Max	z	91	Max	0.763256795	NO
Pbx2	Pbx2_496	0.183357343	0.020955446	4.06E-05	chr17	34592471	34597341	1	374	Pbx2	z	496	Pbx2	0.854715333	NO
Nr1i3	Nr1i3_658	-0.182976655	0.02175511	4.22E-05	chr1	171213970	171219193	1	745	Nr1i3	z	658	Nr1i3	2860079561	NO
Nfia	Nfia_862	0.182498043	0.022801457	4.42E-05	chr4	97581943	98118876	1	333	Nfia	z	862	Nfia	4507374837	NO
Ybx1	Ybx1_822	0.179465233	0.030621914	5.93E-05	chr4	119294513	119277327	2	499	Ybx1	z	822	Ybx1	0.609772512	NO
Hsf4	Hsf4_627	0.178847448	0.032498635	6.30E-05	chr8	105269801	105275845	1	565	Hsf4	z	627	Hsf4	1108424332	NO
Nr3c1	Nr3c1_673	0.177349347	0.037510335	7.27E-05	chr18	39489776	39410545	2	197	Nr3c1	z	673	Nr3c1	2565583157	NO
Zfp410	Zfp410_196	-0.177019986	0.038705869	7.50E-05	chr12	84316859	84344439	1	307	Zfp410	z	196	Zfp410	1842150937	NO
Mzf1	Mzf1_179	0.17492833	0.047178114	9.14E-05	chr7	13054764	13042303	2	92	Mzf1	z	179	Mzf1	1116902743	NO
Dmrt2	Dmrt2_254	0.170564206	0.070785138	0.00013718	chr19	25672411	25678991	1	298	Dmrt2	z	254	Dmrt2	2382443524	NO
Sox4	Sox4_751	-0.170368259	0.07206986	0.00013967	chr13	28953682	28950716	2	137	Sox4	z	751	Sox4	2150243744	NO
Neurog2	Neurog2_49	-0.169878955	0.075374209	0.000146074	chr3	127633145	127635631	1	633	Neurog2	z	49	Neurog2	3421287736	NO
Hoxa5	Hoxa5_510	0.169650362	0.076966204	0.000149159	chr6	52204587	52201754	2	225	Hoxa5	z	510	Hoxa5	4358548229	NO
Gm5294	Gm5294_335	0.169446983	0.078409081	0.000151956	chr5	138820080	138821619	1	834	Gm5294	z	335	Gm5294	3215504918	NO
Foxi1	Foxi1_317	0.16925882	0.07976658	0.000154586	chr11	34208089	34204341	2	173	Foxi1	z	317	Foxi1	2765406013	NO
Tbpl2	Tbpl2_773	0.166421234	0.103106537	0.000199819	chr2	24096595	24071366	2	90	Tbpl2	z	773	Tbpl2	1671864862	NO
Rorc	Rorc_678	-0.165063126	0.116413531	0.000225608	chr3	94372794	94398276	1	368	Rorc	z	678	Rorc	2679237077	NO
Mlxipl	Mlxipl_779	-0.165054413	0.116503868	0.000225783	chr5	135106891	135138382	1	750	Mlxipl	z	779	Mlxipl	1492057742	NO
Gm5294	Gm5294_348	0.164869471	0.118436969	0.000229529	chr5	138820080	138821619	1	834	Gm5294	z	348	Gm5294	2621843824	NO
Meox1	Meox1_398	-0.164050082	0.127368171	0.000246838	chr11	101894354	101877510	2	974	Meox1	z	398	Meox1	3763825469	NO
Zkscan1	Zkscan1_178	0.163473451	0.13402676	0.000259742	chr5	138085084	138107822	1	815	Zkscan1	z	178	Zkscan1	0.752655405	NO
Patz1	Patz1_153	0.162276711	0.148897496	0.000288561	chr11	3289131	3309083	1	4	Patz1	z	153	Patz1	2211001853	NO
Gm5294	Gm5294_337	0.16048153	0.174117705	0.000337437	chr5	138820080	138821619	1	834	Gm5294	z	337	Gm5294	3169918557	NO
Rarg	Rarg_654	-0.159375423	0.19158505	0.000371289	chr15	102257522	102234938	2	572	Rarg	z	654	Rarg	5528200566	NO
Plag1	Plag1_144	0.15934843	0.192031056	0.000372153	chr4	3938405	3901158	2	5	Plag1	z	144	Plag1	1226271268	NO
Sox5	Sox5_738	0.158148877	0.212856844	0.000412513	chr6	144781977	143828425	2	777	Sox5	z	738	Sox5	113002517	NO
Gm5294	Gm5294_340	0.156798812	0.238802016	0.000462795	chr5	138820080	138821619	1	834	Gm5294	z	340	Gm5294	2765406013	NO
Zfp637	Zfp637_220	-0.152769101	0.334786628	0.000648811	chr6	117841242	117845956	1	551	Zfp637	z	220	Zfp637	2409875233	NO
Terf2	Terf2_648	0.15103801	0.386115837	0.000748287	chr8	107096545	107069402	2	621	Terf2	z	648	Terf2	0.87038798	NO
Pou2f3	Pou2f3_487	-0.147612975	0.5097746	0.000987935	chr9	43205755	43123939	2	198	Pou2f3	z	487	Pou2f3	6115814123	NO
Gm5294	Gm5294_347	0.146200813	0.570678197	0.001105965	chr5	138820080	138821619	1	834	Gm5294	z	347	Gm5294	2667601849	NO
Ar	Ar_687	0.145837543	0.587395063	0.001138363	chrX	98148757	98323218	1	266	Ar	z	687	Ar	1415955138	NO
Hif3a	Hif3a_869	-0.145727798	0.592533357	0.00114832	chr7	17062427	17030993	2	122	Hif3a	z	869	Hif3a	3774045833	NO
Bcl6b	Bcl6b_141	0.145371681	0.60949339	0.001181189	chr11	70229798	70224127	2	502	Bcl6b	z	141	Bcl6b	0.779304019	NO
Foxn3	Foxn3_829	0.144715436	0.641923497	0.001244038	chr12	99450074	99195094	2	370	Foxn3	z	829	Foxn3	3253841497	NO
Nfe2l3	Nfe2l3_871	0.143626955	0.699234998	0.001355107	chr6	51432670	51458768	1	212	Nfe2l3	z	871	Nfe2l3	1730366115	NO
Zbtb1	Zbtb1_182	0.14303283	0.732467261	0.00141951	chr12	76370266	76388747	1	236	Zbtb1	z	182	Zbtb1	0.676395648	NO
Zfp784	Zfp784_199	0.143012957	0.733603555	0.001421712	chr7	5038446	5034446	2	54	Zfp784	z	199	Zfp784	1472891167	NO
Hoxa4	Hoxa4_396	0.142622367	0.756267727	0.001465635	chr6	52191703	52189687	2	224	Hoxa4	z	396	Hoxa4	7836104175	NO
Ikzf4	Ikzf4_796	-0.142139112	0.785198773	0.001521703	chr10	128645993	128632415	2	696	Ikzf4	z	796	Ikzf4	242325819	NO
Nr1h4	Nr1h4_850	-0.1417626	0.808439989	0.001566744	chr10	89533622	89454234	2	505	Nr1h4	z	850	Nr1h4	5454080963	NO
Hoxb3	Hoxb3_546	0.14025125	0.908227855	0.001760132	chr11	96323126	96347930	1	838	Hoxb3	z	546	Hoxb3	3900192963	NO
Srf	Srf_639	-0.138011812	1	0.00208713	chr17	46556162	46546839	2	530	Srf	z	639	Srf	0.962161155	NO
Creb3	Creb3_870	0.137859083	1	0.002111338	chr4	43562634	43567060	1	147	Creb3	z	870	Creb3	4563062597	NO
Ascl1	Ascl1_780	-0.136579901	1	0.002324399	chr10	87493660	87491041	2	490	Ascl1	z	780	Ascl1	1309017212	NO
Irx5	Irx5_484	-0.135434153	1	0.002531712	chr8	92357796	92361456	1	489	Irx5	z	484	Irx5	1813952319	NO
Atf5	Atf5_791	0.134321414	1	0.002749056	chr7	44816658	44812256	2	455	Atf5	z	791	Atf5	6370227132	NO
Onecut1	Onecut1_826	0.13383777	1	0.002848715	chr9	74861921	74889648	1	483	Onecut1	z	826	Onecut1	1560350234	NO
Six4	Six4_493	-0.133781096	1	0.002860606	chr12	73113245	73100259	2	217	Six4	z	493	Six4	1825430495	NO
Hmx2	Hmx2_549	0.133075846	1	0.003012403	chr7	131548773	131556582	1	1039	Hmx2	z	549	Hmx2	2399666875	NO
Tcf12	Tcf12_59	0.131779768	1	0.003310602	chr9	72111819	71844252	2	466	Tcf12	z	59	Tcf12	1117465328	NO
Tcf4	Tcf4_88	-0.131260137	1	0.003437505	chr18	69344492	69687967	1	312	Tcf4	z	88	Tcf4	1071732895	NO
Homez	Homez_562	0.130825632	1	0.003546991	chr14	54864158	54852736	2	233	Homez	z	562	Homez	0.646890654	NO
Zkscan4	Zkscan4_216	0.130181648	1	0.003715084	chr13	21478849	21485507	1	67	Zkscan4	z	216	Zkscan4	0.320617503	NO
Irx1	Irx1_565	0.128166614	1	0.004288723	chr13	71963723	71958232	2	405	Irx1	z	565	Irx1	0.897889743	NO
Rfx1	Rfx1_708	0.126660939	1	0.004768378	chr8	84066836	84096992	1	418	Rfx1	z	708	Rfx1	3400963963	NO
Sox6	Sox6_742	-0.125299996	1	0.005243017	chr7	116038744	115470872	2	859	Sox6	z	742	Sox6	1124883409	NO
Hivep1	Hivep1_157	-0.124689874	1	0.005469294	chr13	42052021	42185026	1	201	Hivep1	z	157	Hivep1	336071757	NO
Pax5	Pax5_694	-0.124659258	1	0.005480877	chr4	44710440	44531506	2	164	Pax5	z	694	Pax5	4504196832	NO
Hoxb4	Hoxb4_511	0.123362263	1	0.005992301	chr11	96318267	96321638	1	837	Hoxb4	z	511	Hoxb4	7913048783	NO
Ubp1	Ubp1_836	0.122471317	1	0.00636804	chr9	113930934	113977202	1	758	Ubp1	z	836	Ubp1	5755962602	NO
Fos	Fos_104	0.120108043	1	0.00746914	chr12	85473901	85477269	1	330	Fos	z	104	Fos	2392122275	NO
Arnt2	Arnt2_26	-0.118526374	1	0.00829821	chr7	84410038	84246275	2	667	Arnt2	z	26	Arnt2	111273911	NO
Usf2	Usf2_95	0.117704877	1	0.008760414	chr7	30956803	30945248	2	359	Usf2	z	95	Usf2	183977692	NO
Pgr	Pgr_849	-0.117554334	1	0.008847559	chr9	8899833	8968611	1	21	Pgr	z	849	Pgr	2638170864	NO
Hoxa1	Hoxa1_479	0.114854872	1	0.010546781	chr6	52158317	52155367	2	219	Hoxa1	z	479	Hoxa1	4307900777	NO
Hmga1	Hmga1_776	0.114555011	1	0.010752344	chr17	27556574	27563672	1	230	Hmga1	z	776	Hmga1	1832952337	NO
Gm5294	Gm5294_344	0.11272136	1	0.012088364	chr5	138820080	138821619	1	834	Gm5294	z	344	Gm5294	1472634086	NO
Hoxb5	Hoxb5_512	0.111573724	1	0.012997328	chr11	96303512	96306121	1	836	Hoxb5	z	512	Hoxb5	4160947917	NO
Elf5	Elf5_281	0.111358053	1	0.013174719	chr2	103412098	103450989	1	554	Elf5	z	281	Elf5	2099324622	NO
Srebf2	Srebf2_38	-0.110908378	1	0.013551459	chr15	82147269	82204960	1	361	Srebf2	z	38	Srebf2	1266630803	NO
Ascl2	Ascl2_23	-0.110415966	1	0.013974858	chr7	142969264	142966822	2	1140	Ascl2	z	23	Ascl2	1309017212	NO
Foxj1	Foxj1_305	0.110175822	1	0.014185536	chr11	116336390	116330704	2	1157	Foxj1	z	305	Foxj1	3215504918	NO
Cux2	Cux2_244	-0.110128901	1	0.014227025	chr5	122049851	121860216	2	637	Cux2	z	244	Cux2	1022449023	NO
Hoxc5	Hoxc5_441	0.109689793	1	0.014620496	chr15	103014008	103017429	1	594	Hoxc5	z	441	Hoxc5	5916771979	NO
Ehf	Ehf_275	0.105663927	1	0.018697049	chr2	103303196	103263433	2	552	Ehf	z	275	Ehf	1977547073	NO
Hes2	Hes2_51	-0.105210624	1	0.019213007	chr4	152158867	152162469	1	881	Hes2	z	51	Hes2	0.569478898	NO
Gm5294	Gm5294_341	0.104932408	1	0.019535784	chr5	138820080	138821619	1	834	Gm5294	z	341	Gm5294	2587121869	NO
Gm5294	Gm5294_342	-0.104025671	1	0.020620751	chr5	138820080	138821619	1	834	Gm5294	z	342	Gm5294	0.844397322	NO
Twist1	Twist1_785	0.103790927	1	0.02091003	chr12	33957671	33959831	1	108	Twist1	z	785	Twist1	2538745691	NO
Hoxa11	Hoxa11_507	-0.103169469	1	0.02169295	chr6	52245810	52242105	2	230	Hoxa11	z	507	Hoxa11	3091632252	NO
Stat6	Stat6_753	0.100236804	1	0.025740202	chr10	127642986	127660987	1	659	Stat6	z	753	Stat6	1071116077	NO
Arnt	Arnt_25	0.099123602	1	0.027438751	chr3	95434390	95497240	1	404	Arnt	z	25	Arnt	1205100379	NO
Barhl1	Barhl1_457	-0.098338745	1	0.028693474	chr2	28916440	28907680	2	188	Barhl1	z	457	Barhl1	1980446842	NO
Gabpa	Gabpa_273	0.097016882	1	0.030918086	chr16	84834925	84863779	1	408	Gabpa	z	273	Gabpa	8106459497	NO
Nfil3	Nfil3_138	0.095726828	1	0.033229869	chr13	52981039	52967209	2	264	Nfil3	z	138	Nfil3	2113916528	NO
Esr2	Esr2_668	0.095153211	1	0.034304235	chr12	76177259	76120419	2	231	Esr2	z	668	Esr2	3675662725	NO
Hoxa6	Hoxa6_533	0.092716331	1	0.039204274	chr6	52208624	52206365	2	226	Hoxa6	z	533	Hoxa6	4452616895	NO
Atf2	Atf2_112	-0.091375349	1	0.042144929	chr2	73892639	73816509	2	429	Atf2	z	112	Atf2	472744262	NO
Zfp524	Zfp524_212	0.090658389	1	0.043792072	chr7	5015508	5018488	1	52	Zfp524	z	212	Zfp524	1459029953	NO
Gm5294	Gm5294_350	0.089693373	1	0.046094382	chr5	138820080	138821619	1	834	Gm5294	z	350	Gm5294	1794424359	NO
Bhlhe41	Bhlhe41_56	-0.088562597	1	0.048920624	chr6	145865420	145858243	2	785	Bhlhe41	z	56	Bhlhe41	1148952552	NO
Lyl1	Lyl1_783	-0.088048724	1	0.050252124	chr8	84701457	84704716	1	432	Lyl1	z	783	Lyl1	1120699106	NO
Jund	Jund_135	0.088047939	1	0.050254182	chr8	70697739	70700616	1	305	Jund	z	135	Jund	196612619	NO
Meox2	Meox2_504	-0.0877064	1	0.051155825	chr12	37108546	37179528	1	117	Meox2	z	504	Meox2	3018123794	NO
Glis2	Glis2_148	0.087660891	1	0.051276978	chr16	4594713	4615957	1	16	Glis2	z	148	Glis2	1189579972	NO
Hmga2	Hmga2_14	0.086360665	1	0.054840922	chr10	120476935	120361275	2	613	Hmga2	z	14	Hmga2	1832952337	NO
Bhlhe40	Bhlhe40_55	-0.086151844	1	0.055432063	chr6	108660629	108666925	1	489	Bhlhe40	z	55	Bhlhe40	1367732131	NO
Zfp128	Zfp128_223	-0.086082539	1	0.055629421	chr7	12881178	12893422	1	81	Zfp128	z	223	Zfp128	0.721291538	NO
Scx	Scx_61	-0.083436086	1	0.063613664	chr15	76457438	76459468	1	239	Scx	z	61	Scx	5322806965	NO
Hoxc11	Hoxc11_404	-0.082526591	1	0.066566587	chr15	102954526	102956701	1	589	Hoxc11	z	404	Hoxc11	2946465224	NO
Rfx7	Rfx7_709	0.08182399	1	0.068924042	chr9	72532240	72622949	1	471	Rfx7	z	709	Rfx7	3132655795	NO
Smad5	Smad5_883	0.080575005	1	0.073283425	chr13	56703010	56742378	1	320	Smad5	z	883	Smad5	1315618424	NO
Smad2	Smad2_861	-0.079979723	1	0.075438916	chr18	76241701	76311747	1	340	Smad2	z	861	Smad2	1456834485	NO
Hnf4g	Hnf4g_664	0.07678274	1	0.087913321	chr3	3508030	3659800	1	1	Hnf4g	z	664	Hnf4g	1746948467	NO
Myc	Myc_37	0.07560622	1	0.092901855	chr15	61985341	61990361	1	164	Myc	z	37	Myc	2112079892	NO
Zfp282	Zfp282_170	0.075252968	1	0.094443105	chr6	47877555	47908485	1	173	Zfp282	z	170	Zfp282	0.851204148	NO
Glis1	Glis1_185	-0.074841611	1	0.096263552	chr4	107434591	107635059	1	385	Glis1	z	185	Glis1	1108085361	NO
Mga	Mga_96	0.074077282	1	0.099720302	chr2	119872551	119969581	1	653	Mga	z	96	Mga	5995772495	NO
Cux1	Cux1_474	-0.073661961	1	0.101639612	chr5	136567490	136248135	2	776	Cux1	z	474	Cux1	0.844975541	NO
Foxc2	Foxc2_316	0.069123635	1	0.124574397	chr8	121116171	121118895	1	715	Foxc2	z	316	Foxc2	4690368276	NO
Zbtb49	Zbtb49_176	-0.066670031	1	0.13854987	chr5	38220428	38189735	2	224	Zbtb49	z	176	Zbtb49	1155553358	NO
Hesx1	Hesx1_523	0.06639908	1	0.140164227	chr14	27000362	27002326	1	83	Hesx1	z	523	Hesx1	3020269692	NO
Irf3	Irf3_630	-0.064108114	1	0.154395882	chr7	44997648	45002848	1	468	Irf3	z	630	Irf3	5280824441	NO
Mesp1	Mesp1_58	-0.062718195	1	0.163548484	chr7	79793590	79792241	2	618	Mesp1	z	58	Mesp1	1104777935	NO
Hes1	Hes1_39	0.06167	1	0.170716188	chr16	30065357	30067796	1	211	Hes1	z	39	Hes1	0.922046954	NO
Ctcf	Ctcf_146	0.0579932	1	0.197714815	chr8	105636538	105682922	1	581	Ctcf	z	146	Ctcf	6389689251	NO
Sox15	Sox15_737	0.057821798	1	0.199045377	chr11	69655037	69656727	1	463	Sox15	z	737	Sox15	1113632115	NO
Mlx	Mlx_27	0.056519266	1	0.209370335	chr11	101087290	101092207	1	942	Mlx	z	27	Mlx	1510340043	NO
Gm5294	Gm5294_345	-0.054801227	1	0.223572799	chr5	138820080	138821619	1	834	Gm5294	z	345	Gm5294	0.718076522	NO
Nr1i2	Nr1i2_672	-0.054517379	1	0.22598389	chr16	38294824	38248349	2	298	Nr1i2	z	672	Nr1i2	310343823	NO
Sox13	Sox13_749	-0.054329632	1	0.227588793	chr1	133424212	133382300	2	535	Sox13	z	749	Sox13	0.783928949	NO
Zfp148	Zfp148_800	0.053972412	1	0.230664732	chr16	33380775	33503903	1	250	Zfp148	z	800	Zfp148	2203679786	NO
Ebf1	Ebf1_90	-0.053647307	1	0.233489634	chr11	44618100	45008096	1	198	Ebf1	z	90	Ebf1	218884598	NO
Tfdp2	Tfdp2_255	0.052461318	1	0.244001937	chr9	96196275	96323646	1	578	Tfdp2	z	255	Tfdp2	1195117561	NO
Bcl11b	Bcl11b_814	-0.051170832	1	0.255812031	chr12	108003414	107910403	2	427	Bcl11b	z	814	Bcl11b	2515703893	NO
Nr6a1	Nr6a1_689	-0.050424542	1	0.262819736	chr2	38926503	38723374	2	316	Nr6a1	z	689	Nr6a1	4547954096	NO
Hes7	Hes7_40	-0.05041489	1	0.262911229	chr11	69120453	69123259	1	444	Hes7	z	40	Hes7	0.81475163	NO
Myb	Myb_644	-0.050375568	1	0.263284177	chr10	21160984	21124930	2	70	Myb	z	644	Myb	0.779038974	NO
Foxj2	Foxj2_298	0.048688667	1	0.279627249	chr6	122820184	122845366	1	597	Foxj2	z	298	Foxj2	2872502838	NO
Zbtb6	Zbtb6_228	0.048445349	1	0.282040103	chr2	37443121	37425500	2	306	Zbtb6	z	228	Zbtb6	1017055159	NO
Stat5a	Stat5a_755	0.048444016	1	0.282053362	chr11	100859351	100885169	1	936	Stat5a	z	755	Stat5a	2020334171	NO
Gm5294	Gm5294_346	0.043643821	1	0.332534913	chr5	138820080	138821619	1	834	Gm5294	z	346	Gm5294	2256923642	NO
Cdx4	Cdx4_481	-0.042435485	1	0.346106917	chrX	103321398	103330224	1	301	Cdx4	z	481	Cdx4	2834359038	NO
Zfp523	Zfp523_165	-0.042323806	1	0.347378809	chr17	28177418	28205886	1	243	Zfp523	z	165	Zfp523	1251716946	NO
Ovol2	Ovol2_809	-0.041466547	1	0.357240502	chr2	144332080	144305175	2	841	Ovol2	z	809	Ovol2	1381973763	NO
Heyl	Heyl_60	-0.040297652	1	0.370967308	chr4	123233556	123249870	1	530	Heyl	z	60	Heyl	0.755391176	NO
Foxn2	Foxn2_830	-0.039702803	1	0.378076499	chr17	88440712	88490533	1	768	Foxn2	z	830	Foxn2	3654321828	NO
Nfatc3	Nfatc3_702	0.038375977	1	0.394232492	chr8	106058840	106130537	1	602	Nfatc3	z	702	Nfatc3	2485665633	NO
Hhex	Hhex_449	-0.036883901	1	0.412889707	chr19	37434841	37440731	1	372	Hhex	z	449	Hhex	1102653784	NO
Gm5294	Gm5294_353	0.036551564	1	0.417115242	chr5	138820080	138821619	1	834	Gm5294	z	353	Gm5294	4546241122	NO
Tbx3	Tbx3_765	0.036542475	1	0.417231165	chr5	119670862	119684724	1	603	Tbx3	z	765	Tbx3	6621687048	NO
Zbtb7c	Zbtb7c_812	0.036151523	1	0.42223517	chr18	75820178	76148564	1	339	Zbtb7c	z	812	Zbtb7c	1741003106	NO
Tal2	Tal2_781	-0.036086237	1	0.423074207	chr4	53779705	53786885	1	224	Tal2	z	781	Tal2	307140751	NO
Pparg	Pparg_653	-0.035819319	1	0.426514651	chr6	115360951	115490401	1	530	Pparg	z	653	Pparg	165394747	NO
Bach2	Bach2_119	0.03445906	1	0.444298574	chr4	32238950	32586108	1	71	Bach2	z	119	Bach2	1926942867	NO
Klf1	Klf1_214	-0.034110734	1	0.448919496	chr8	84901928	84905295	1	441	Klf1	z	214	Klf1	6673939082	NO
Zbtb3	Zbtb3_235	0.034101744	1	0.449039124	chr19	8802496	8804854	1	180	Zbtb3	z	235	Zbtb3	1216600621	NO
E2f4	E2f4_257	-0.033167563	1	0.461567221	chr8	105297663	105305370	1	569	E2f4	z	257	E2f4	1004337744	NO
Rorb	Rorb_684	0.032711053	1	0.467759463	chr19	19111196	18930609	2	274	Rorb	z	684	Rorb	2895371838	NO
Smad9	Smad9_884	-0.032180884	1	0.47500808	chr3	54755582	54801269	1	146	Smad9	z	884	Smad9	1456834485	NO
Zbtb7b	Zbtb7b_174	0.031368212	1	0.486237465	chr3	89393203	89377646	2	308	Zbtb7b	z	174	Zbtb7b	179999079	NO
Hic2	Hic2_211	-0.030011888	1	0.505293308	chr16	17233587	17263430	1	105	Hic2	z	211	Hic2	1791988243	NO
Dnajc21	Dnajc21_201	-0.029437231	1	0.513483712	chr15	10470516	10446763	2	37	Dnajc21	z	201	Dnajc21	1630749574	NO
Gm5294	Gm5294_338	0.027732238	1	0.538183738	chr5	138820080	138821619	1	834	Gm5294	z	338	Gm5294	2969245407	NO
Rfx2	Rfx2_707	0.027425212	1	0.542693921	chr17	56831008	56775897	2	629	Rfx2	z	707	Rfx2	3888988166	NO
Zfp711	Zfp711_168	-0.027107937	1	0.547374307	chrX	112600526	112635062	1	334	Zfp711	z	168	Zfp711	1015017831	NO
Tead4	Tead4_868	0.026735525	1	0.552893339	chr6	128300813	128227143	2	667	Tead4	z	868	Tead4	9067150512	NO
Gcm1	Gcm1_388	-0.026173692	1	0.561270659	chr9	78051958	78065624	1	504	Gcm1	z	388	Gcm1	0.79507004	NO
Pax8	Pax8_854	-0.025987855	1	0.564055029	chr2	24475599	24420551	2	95	Pax8	z	854	Pax8	3938640156	NO
Sox18	Sox18_740	0.02551652	1	0.571146579	chr2	181671640	181669837	2	1172	Sox18	z	740	Sox18	125042045	NO
Snai3	Snai3_147	0.021472204	1	0.633665829	chr8	122460692	122454206	2	728	Snai3	z	147	Snai3	3144024198	NO
Bbx	Bbx_730	0.020281206	1	0.652613932	chr16	50432389	50191844	2	354	Bbx	z	730	Bbx	3306150209	NO
Foxp4	Foxp4_300	-0.018793551	1	0.676598061	chr17	47924632	47867133	2	564	Foxp4	z	300	Foxp4	2872502838	NO
Nr2f2	Nr2f2_680	0.017665224	1	0.695011387	chr7	70366746	70351950	2	594	Nr2f2	z	680	Nr2f2	4803416291	NO
Nfatc1	Nfatc1_703	0.017564864	1	0.6966581	chr18	80713071	80606205	2	360	Nfatc1	z	703	Nfatc1	2805279656	NO
Foxp2	Foxp2_301	0.016884534	1	0.707858193	chr6	14901349	15441977	1	35	Foxp2	z	301	Foxp2	2872502838	NO
Srebf1	Srebf1_32	-0.015209801	1	0.735694264	chr11	60220627	60199084	2	358	Srebf1	z	32	Srebf1	1458941218	NO
Rxrb	Rxrb_686	0.015195732	1	0.735929641	chr17	34031812	34038403	1	353	Rxrb	z	686	Rxrb	1948426002	NO
Lhx2	Lhx2_393	0.015122464	1	0.737155806	chr2	38339281	38369737	1	313	Lhx2	z	393	Lhx2	3447421389	NO
Ppara	Ppara_670	0.013180625	1	0.769887758	chr15	85735564	85806851	1	410	Ppara	z	670	Ppara	738798758	NO
Sox7	Sox7_746	0.011827369	1	0.792946584	chr14	63943706	63950732	1	343	Sox7	z	746	Sox7	125042045	NO
Etv4	Etv4_278	0.010639203	1	0.813343003	chr11	101785310	101769748	2	973	Etv4	z	278	Etv4	503602616	NO
Msx2	Msx2_433	0.00960254	1	0.831242871	chr13	53472780	53466881	2	268	Msx2	z	433	Msx2	1541206334	NO
Klf5	Klf5_145	-0.009411239	1	0.834555885	chr14	99298691	99313412	1	465	Klf5	z	145	Klf5	45262634	NO
Atoh8	Atoh8_67	0.008773936	1	0.845613729	chr6	72235577	72206177	2	303	Atoh8	z	67	Atoh8	8986018575	NO
Hsf2	Hsf2_625	-0.007127168	1	0.874322368	chr10	57486385	57513143	1	186	Hsf2	z	625	Hsf2	0.548525686	NO
Sp9	Sp9_231	0.004397247	1	0.922261274	chr2	73271926	73275771	1	421	Sp9	z	231	Sp9	3630106375	NO
Thra	Thra_852	-0.004260885	1	0.924664752	chr11	98741785	98769006	1	893	Thra	z	852	Thra	1493588883	NO
Mesp2	Mesp2_57	-0.00373004	1	0.934027566	chr7	79810727	79813431	1	619	Mesp2	z	57	Mesp2	1104777935	NO
Phf21a	Phf21a_15	0.003332127	1	0.94105183	chr2	92184182	92364666	1	520	Phf21a	z	15	Phf21a	2497610961	NO
Gm5294	Gm5294_349	0.002642033	1	0.953244414	chr5	138820080	138821619	1	834	Gm5294	z	349	Gm5294	0.705291482	NO
Pbx3	Pbx3_513	0.000577373	1	0.989776772	chr2	34372045	34171457	2	280	Pbx3	z	513	Pbx3	4537428939	NO
Foxk2	Foxk2_310	0.000466155	1	0.991745973	chr11	121259683	121309896	1	1255	Foxk2	z	310	Foxk2	2872502838	NO
Cebpa	Cebpa_115	0.000373933	1	0.993378879	chr7	35119293	35121928	1	382	Cebpa	z	115	Cebpa	3995786381	NO
Esrrg	Esrrg_676	-0.000219026	1	0.996121736	chr1	187609006	188214884	1	870	Esrrg	z	676	Esrrg	8671030392	NO
E2f7	E2f7_260	-9.16E-05	1	0.998377619	chr10	110745465	110787384	1	565	E2f7	z	260	E2f7	0.879553547	NO
Sox17	Sox17_733	NA	NA	NA	chr1	4497354	4490928	2	2	Sox17	z	733	Sox17	1575290734	NO
Gli2	Gli2_815	NA	NA	NA	chr1	119053619	118834061	2	459	Gli2	z	815	Gli2	2587779453	NO
Prrx1	Prrx1_455	NA	NA	NA	chr1	163313650	163245119	2	681	Prrx1	z	455	Prrx1	3430787356	NO
Hey2	Hey2_29	NA	NA	NA	chr10	30842783	30832359	2	106	Hey2	z	29	Hey2	0.755391176	NO
Atoh7	Atoh7_64	NA	NA	NA	chr10	63100156	63100605	1	245	Atoh7	z	64	Atoh7	2278981673	NO
Sox30	Sox30_736	NA	NA	NA	chr11	45980310	46017992	1	203	Sox30	z	736	Sox30	1003252542	NO
Gli3	Gli3_155	NA	NA	NA	chr13	15463235	15730026	1	45	Gli3	z	155	Gli3	2173893529	NO
Pitx1	Pitx1_434	NA	NA	NA	chr13	55831425	55825054	2	312	Pitx1	z	434	Pitx1	2323246365	NO
Ahrr	Ahrr_36	NA	NA	NA	chr13	74292331	74211118	2	423	Ahrr	z	36	Ahrr	0.781944598	NO
Pou4f1	Pou4f1_841	NA	NA	NA	chr14	104467999	104462320	2	478	Pou4f1	z	841	Pou4f1	5089108519	NO
Snai2	Snai2_799	NA	NA	NA	chr16	14705859	14709385	1	81	Snai2	z	799	Snai2	9519762752	NO
Erg	Erg_287	NA	NA	NA	chr16	95586593	95359169	2	464	Erg	z	287	Erg	1077766658	NO
Zscan10	Zscan10_164	NA	NA	NA	chr17	23600826	23611019	1	105	Zscan10	z	164	Zscan10	1089205909	NO
Sox8	Sox8_731	NA	NA	NA	chr17	25570686	25565893	2	181	Sox8	z	731	Sox8	113002517	NO
Gata6	Gata6_382	NA	NA	NA	chr18	11052510	11085635	1	29	Gata6	z	382	Gata6	5026936616	NO
Pitx3	Pitx3_452	NA	NA	NA	chr19	46148325	46135685	2	463	Pitx3	z	452	Pitx3	207272162	NO
Lhx6	Lhx6_458	NA	NA	NA	chr2	36105408	36081953	2	300	Lhx6	z	458	Lhx6	3907041107	NO
Wt1	Wt1_872	NA	NA	NA	chr2	105126529	105173614	1	574	Wt1	z	872	Wt1	2579142277	NO
Ctcfl	Ctcfl_820	NA	NA	NA	chr2	173119525	173093609	2	1103	Ctcfl	z	820	Ctcfl	5691129547	NO
Hey1	Hey1_73	NA	NA	NA	chr3	8667038	8663359	2	8	Hey1	z	73	Hey1	0.755391176	NO
Sox2	Sox2_750	NA	NA	NA	chr3	34649995	34652461	1	88	Sox2	z	750	Sox2	0.745603754	NO
Tbx15	Tbx15_864	NA	NA	NA	chr3	99253760	99354260	1	474	Tbx15	z	864	Tbx15	2662894788	NO
Foxd2	Foxd2_322	NA	NA	NA	chr4	114908898	114906280	2	421	Foxd2	z	322	Foxd2	4755768207	NO
Tal1	Tal1_782	NA	NA	NA	chr4	115056426	115071755	1	424	Tal1	z	782	Tal1	1120699106	NO
Trp73	Trp73_691	NA	NA	NA	chr4	154140208	154056249	2	892	Trp73	z	691	Trp73	7408596031	NO
Msx1	Msx1_543	NA	NA	NA	chr5	37824585	37820491	2	221	Msx1	z	543	Msx1	3018043642	NO
Uncx	Uncx_469	NA	NA	NA	chr5	139543898	139548179	1	847	Uncx	z	469	Uncx	2914470902	NO
Bhlha15	Bhlha15_87	NA	NA	NA	chr5	144190286	144194441	1	896	Bhlha15	z	87	Bhlha15	2715897741	NO
Tlx2	Tlx2_574	NA	NA	NA	chr6	83070225	83068325	2	337	Tlx2	z	574	Tlx2	3508294983	NO
Lbx2	Lbx2_498	NA	NA	NA	chr6	83086365	83088241	1	339	Lbx2	z	498	Lbx2	3447421389	NO
E2f8	E2f8_263	NA	NA	NA	chr7	48881596	48866429	2	539	E2f8	z	263	E2f8	1012294233	NO
Gata1	Gata1_387	NA	NA	NA	chrX	7976574	7959260	2	29	Gata1	z	387	Gata1	5523117382	NO
